# Supplementary material for: Global evidence on falls and subsequent social isolation in older adults: a scoping review
Source: PubMed Central journal article supplement — BMJ Open. 2022 Sep 28;12(9):e062124. doi: 10.1136/bmjopen-2022-062124 (PMC9528590; doi:10.1136/bmjopen-2022-062124), 2022-09-28
Supplement: bmjopen-2022-062124.draft_revisions.pdf [file bmjopen-2022-062124.draft_revisions.pdf]

# BMJ Open

BMJ Open is committed to open peer review. As part of this commitment we make the peer review history of every article we publish publicly available.

When an article is published we post the peer reviewers' comments and the authors' responses online. We also post the versions of the paper that were used during peer review. These are the versions that the peer review comments apply to.

The versions of the paper that follow are the versions that were submitted during the peer review process. They are not the versions of record or the final published versions. They should not be cited or distributed as the published version of this manuscript.

BMJ Open is an open access journal and the full, final, typeset and author-corrected version of record of the manuscript is available on our site with no access controls, subscription charges or pay-per-view fees (<http://bmjopen.bmj.com>).

If you have any questions on BMJ Open's open peer review process please email [info.bmjopen@bmj.com](mailto:info.bmjopen@bmj.com)

# BMJ Open

## Global evidence on falls and subsequent social isolation in older adults: A scoping review

|                               |                                                                                                                                                                                                                                                                                                                                                                                                                                                                                                                                                                                                                                                                                                                                                                                                                                                                                                                                                                                                                                                                                                                                                                                                                                                                                                                                                                                                                                                                                                   |
|-------------------------------|---------------------------------------------------------------------------------------------------------------------------------------------------------------------------------------------------------------------------------------------------------------------------------------------------------------------------------------------------------------------------------------------------------------------------------------------------------------------------------------------------------------------------------------------------------------------------------------------------------------------------------------------------------------------------------------------------------------------------------------------------------------------------------------------------------------------------------------------------------------------------------------------------------------------------------------------------------------------------------------------------------------------------------------------------------------------------------------------------------------------------------------------------------------------------------------------------------------------------------------------------------------------------------------------------------------------------------------------------------------------------------------------------------------------------------------------------------------------------------------------------|
| Journal:                      | <i>BMJ Open</i>                                                                                                                                                                                                                                                                                                                                                                                                                                                                                                                                                                                                                                                                                                                                                                                                                                                                                                                                                                                                                                                                                                                                                                                                                                                                                                                                                                                                                                                                                   |
| Manuscript ID                 | bmjopen-2022-062124                                                                                                                                                                                                                                                                                                                                                                                                                                                                                                                                                                                                                                                                                                                                                                                                                                                                                                                                                                                                                                                                                                                                                                                                                                                                                                                                                                                                                                                                               |
| Article Type:                 | Original research                                                                                                                                                                                                                                                                                                                                                                                                                                                                                                                                                                                                                                                                                                                                                                                                                                                                                                                                                                                                                                                                                                                                                                                                                                                                                                                                                                                                                                                                                 |
| Date Submitted by the Author: | 17-Feb-2022                                                                                                                                                                                                                                                                                                                                                                                                                                                                                                                                                                                                                                                                                                                                                                                                                                                                                                                                                                                                                                                                                                                                                                                                                                                                                                                                                                                                                                                                                       |
| Complete List of Authors:     | <p>Thomas, Sonia; St Michael's Hospital Li Ka Shing Knowledge Institute, Knowledge Translation Program</p> <p>Parker, Amanda; St Michael's Hospital Li Ka Shing Knowledge Institute</p> <p>Fortune, Jennifer; RCSI University of Medicine and Health Sciences, Department of Public Health and Epidemiology</p> <p>Mitchell, Gary; Queen's University Belfast, School of Nursing and Midwifery</p> <p>Hezam, Areej; St Michael's Hospital Li Ka Shing Knowledge Institute</p> <p>Jiang, Ying; Public Health Agency of Canada, Centre for Surveillance and Applied Research</p> <p>Degroh, Margaret; Public Health Agency of Canada, Centre for Surveillance and Applied Research</p> <p>Anderson, Kerry; Public Health Agency of Canada, Centre for Health Promotion</p> <p>Gauthier-Beaupré, Amélie; Public Health Agency of Canada, Centre for Health Promotion; University of Ottawa, Faculty of Health Sciences</p> <p>Barker, Joan; St Michael's Hospital Li Ka Shing Knowledge Institute</p> <p>Watt, Jennifer; St Michael's Hospital Li Ka Shing Knowledge Institute; University of Toronto, Department of Geriatric Medicine</p> <p>Straus, Sharon; St Michael's Hospital Li Ka Shing Knowledge Institute; University of Toronto, Department of Geriatric Medicine</p> <p>Tricco, Andrea; St Michael's Hospital Li Ka Shing Knowledge Institute; University of Toronto Dalla Lana School of Public Health, Epidemiology Division and Institute for Health, Management, and Evaluation</p> |
| Keywords:                     | REHABILITATION MEDICINE, GERIATRIC MEDICINE, PREVENTIVE MEDICINE                                                                                                                                                                                                                                                                                                                                                                                                                                                                                                                                                                                                                                                                                                                                                                                                                                                                                                                                                                                                                                                                                                                                                                                                                                                                                                                                                                                                                                  |
|                               |                                                                                                                                                                                                                                                                                                                                                                                                                                                                                                                                                                                                                                                                                                                                                                                                                                                                                                                                                                                                                                                                                                                                                                                                                                                                                                                                                                                                                                                                                                   |

SCHOLARONE™  
Manuscripts

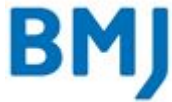

I, the Submitting Author has the right to grant and does grant on behalf of all authors of the Work (as defined in the below author licence), an exclusive licence and/or a non-exclusive licence for contributions from authors who are: i) UK Crown employees; ii) where BMJ has agreed a CC-BY licence shall apply, and/or iii) in accordance with the terms applicable for US Federal Government officers or employees acting as part of their official duties; on a worldwide, perpetual, irrevocable, royalty-free basis to BMJ Publishing Group Ltd ("BMJ") its licensees and where the relevant Journal is co-owned by BMJ to the co-owners of the Journal, to publish the Work in this journal and any other BMJ products and to exploit all rights, as set out in our [licence](#).

The Submitting Author accepts and understands that any supply made under these terms is made by BMJ to the Submitting Author unless you are acting as an employee on behalf of your employer or a postgraduate student of an affiliated institution which is paying any applicable article publishing charge ("APC") for Open Access articles. Where the Submitting Author wishes to make the Work available on an Open Access basis (and intends to pay the relevant APC), the terms of reuse of such Open Access shall be governed by a Creative Commons licence – details of these licences and which [Creative Commons](#) licence will apply to this Work are set out in our licence referred to above.

Other than as permitted in any relevant BMJ Author's Self Archiving Policies, I confirm this Work has not been accepted for publication elsewhere, is not being considered for publication elsewhere and does not duplicate material already published. I confirm all authors consent to publication of this Work and authorise the granting of this licence.

## 1 Global evidence on falls and subsequent social isolation in older adults: A scoping review

- 2 Sonia M. Thomas<sup>1</sup> email: [Sonia.Thomas@unityhealth.to](mailto:Sonia.Thomas@unityhealth.to)
- 3 Amanda Parker<sup>1</sup> email: [Amanda.Parker@unityhealth.to](mailto:Amanda.Parker@unityhealth.to)
- 4 Jennifer Fortune<sup>2</sup> email: [jenniferfortune@rcsi.ie](mailto:jenniferfortune@rcsi.ie)
- 5 Gary Mitchell<sup>3</sup> email: [Gary.Mitchell@qub.ac.uk](mailto:Gary.Mitchell@qub.ac.uk)
- 6 Areej Hezam<sup>1</sup> email: [Areej.Hezam@unityhealth.to](mailto:Areej.Hezam@unityhealth.to)
- 7 Ying Jiang<sup>4</sup> email: [ying.jiang@phac-aspc.gc.ca](mailto:ying.jiang@phac-aspc.gc.ca)
- 8 Margaret de Groh<sup>4</sup> email: [margaret.degroh@phac-aspc.gc.ca](mailto:margaret.degroh@phac-aspc.gc.ca)
- 9 Kerry Anderson<sup>5</sup> email: [kerry.anderson@phac-aspc.gc.ca](mailto:kerry.anderson@phac-aspc.gc.ca)
- 10 Amélie Gauthier-Beaupré<sup>5,6</sup> email: [amelie.gauthier-beaupre@phac-aspc.gc.ca](mailto:amelie.gauthier-beaupre@phac-aspc.gc.ca)
- 11 Joan Barker<sup>1</sup> email: [joanbarker@rogers.com](mailto:joanbarker@rogers.com)
- 12 Jennifer Watt<sup>1,7</sup> email: [Jennifer.Watt@unityhealth.to](mailto:Jennifer.Watt@unityhealth.to)
- 13 Sharon E. Straus<sup>1,7</sup> email: [Sharon.Straus@utoronto.ca](mailto:Sharon.Straus@utoronto.ca)
- 14 Andrea C. Tricco<sup>1,8\*</sup> email: [Andrea.Tricco@unityhealth.to](mailto:Andrea.Tricco@unityhealth.to)
- 15 <sup>1</sup>Li Ka Shing Knowledge Institute, St. Michael's Hospital, 209 Victoria Street, East Building,  
16 Toronto, Ontario, M5B 1W8, Canada
- 17 <sup>2</sup>Department of Public Health and Epidemiology, RCSI University of Medicine and Health  
18 Sciences, Dublin, Ireland
- 19 <sup>3</sup>School of Nursing and Midwifery, Queen's University Belfast, Belfast, United Kingdom.
- 20 <sup>4</sup>Centre for Surveillance and Applied Research, Public Health Agency of Canada, Ottawa,  
21 Ontario, Canada
- 22 <sup>5</sup>Centre for Health Promotion, Public Health Agency of Canada, Ottawa, Ontario, Canada

1  
2  
3 23 <sup>6</sup>Faculty of Health Sciences, University of Ottawa, Ottawa, Ontario, Canada  
4

5 24 <sup>7</sup>Department of Geriatric Medicine, University of Toronto, Toronto, Ontario, Canada  
6

7  
8 25 <sup>8</sup>Epidemiology Division and Institute for Health, Management, and Evaluation, Dalla Lana  
9

10 26 School of Public Health, University of Toronto, Toronto, Ontario, Canada  
11

12 27 **\*Corresponding Author:**  
13

14 28 Dr. Andrea C. Tricco, PhD, MSc  
15

16 29 Scientist and Director of the Knowledge Synthesis Team,  
17

18  
19 30 Knowledge Translation Program, Li Ka Shing Knowledge Institute, St. Michael's Hospital  
20

21 31 209 Victoria Street, East Building, Toronto, Ontario, M5B 1W8, Canada  
22

23  
24 32 Phone: (416) 864-6060 ext. 77521, Fax: (416) 864-6057, Email: [Andrea.Tricco@unityhealth.to](mailto:Andrea.Tricco@unityhealth.to)  
25  
26  
27  
28  
29  
30  
31  
32  
33  
34  
35  
36  
37  
38  
39  
40  
41  
42  
43  
44  
45  
46  
47  
48  
49  
50  
51  
52  
53  
54  
55  
56  
57  
58  
59  
60

## 33 **ABSTRACT**

34 **Objective:** To summarize evidence on falls and subsequent social isolation and/or loneliness in  
35 older adults in any setting, including the role of fear of falling, other risk factors, and how the  
36 COVID-19 context affects this relationship.

37 **Methods:** MEDLINE, CINAHL, Embase, and Ageline databases were searched from inception  
38 until January 11, 2021, in addition to a grey literature search. Studies were eligible for inclusion  
39 if the population had a mean age of 60 years or older, they examined falls and subsequent social  
40 isolation, loneliness, fear of falling or risk factors, and were primary studies (e.g., experimental,  
41 quasi-experimental, observational, qualitative).

42 **Results:** After screening 4,993 citations and 304 full-text articles, 39 studies were included in  
43 this review. Most studies included participants with a history of falling, ranging from 11 to 100  
44 percent of the study population. Most studies were conducted in Europe (44%) and North  
45 America (33%) and were of the cross-sectional study design (66.7%), in the community (79%).  
46 Studies utilized 15 different scales. Six studies examined risk factors for social isolation and  
47 activity restriction associated with fear of falling. Six studies reported mental health outcomes  
48 related to falls and subsequent social isolation. No studies evaluated falls and social isolation in  
49 the context of COVID-19.

50 **Conclusions:** Consistency in outcome measurement is recommended, as multiple outcomes were  
51 used across the included studies. Further research is warranted in this area, given the aging  
52 population and the importance of falls and social isolation to the health of older adults.

53 **Scoping Review Registration:** 10.17605/OSF.IO/2R8HM

54 **Word count:** 243/250 (abstract), 2960/3000 (main text)

55 **Keywords:** scoping review, older adults, falling, social isolation, loneliness, fear of falling

1  
2  
3 56 **Strengths and Limitations of this Study:**  
4

- 5 57 • A robust methodology including a thorough and extensive literature search was used to  
6  
7 review the literature in the area.  
8 58  
9  
10 59 • There was no date limits or language limits for studies eligible for inclusion in this  
11  
12 scoping review.  
13 60  
14  
15 61 • Scoping reviews do not assess the quality of included studies and we cannot confirm the  
16  
17 directional causality between falls and social isolation.  
18 62  
19  
20  
21  
22  
23  
24  
25  
26  
27  
28  
29  
30  
31  
32  
33  
34  
35  
36  
37  
38  
39  
40  
41  
42  
43  
44  
45  
46  
47  
48  
49  
50  
51  
52  
53  
54  
55  
56  
57  
58  
59  
60

## 63 INTRODUCTION

64 Globally, falls are the second leading cause of unintentional injury death, making falls a major  
65 public health concern [1]. In Canada, falls are the leading cause of injury-related hospitalizations  
66 among adults aged 65 years and older, and 20-30% of older adults experience at least one fall  
67 each year [2]. Falls may result in serious health-related consequences including physical (e.g.,  
68 fractures), physiological (e.g., cognitive decline), and psychological (e.g., anxiety, depressive  
69 symptoms, fear of falling, and social isolation) outcomes [3].

70 Specific to social isolation, this is a priority in Canada, as over 30% older adults are at  
71 risk of social isolation [4]. Social isolation among older adults is associated with adverse health  
72 outcomes including cognitive decline, depression, anxiety, and dementia [5]. Given the  
73 detrimental outcomes associated with both falls and social isolation, there is a need to understand  
74 the relationship between falls and subsequent social isolation in older adults. The current scoping  
75 review is focused on falling and the subsequent experience of social isolation and/or loneliness  
76 and to ascertain whether the COVID-19 context affected the relationship between falls and  
77 subsequent social isolation.

## 78 METHODS

### 79 Protocol and registration

80 The protocol for this scoping review was developed in accordance with the JBI (formerly Joanna  
81 Briggs Institute) guidance for scoping reviews and registered with Open Science Framework [6].  
82 An integrated knowledge translation approach was used [7], whereby colleagues from the Public  
83 Health Agency of Canada (YJ, KA, MdG, AGB) co-developed the review and were included as  
84 coauthors on this review, along with our patient partner (JB). The results are reported using the



1  
2  
3 85 Preferred Reporting Items for Systematic Reviews and Meta-analysis (PRISMA) extension to  
4  
5 86 scoping reviews [8] supplemented by the updated PRISMA 2020 statement [9].  
6  
7

### 8 87 Patient and Public Involvement

9  
10 88 Through the Strategy for Patient-Oriented Research (SPOR) Evidence Alliance, we worked with  
11  
12 89 a patient partner who provided feedback on our protocol, participated in a full-text screening  
13  
14 90 pilot, provided input for revisions to the draft and final manuscript, and is a coauthor on this  
15  
16 91 paper (JB).  
17  
18

### 19 92 Search strategy

20  
21 93 An experienced information specialist developed our comprehensive literature search strategy,  
22  
23 94 which was peer-reviewed by a second information specialist using the Peer Review of Electronic  
24  
25 95 Search Strategies (PRESS) checklist [10]. MEDLINE, CINAHL, Embase, and Ageline were  
26  
27 96 searched from inception until January 11, 2021 (Appendix 1). References of included studies and  
28  
29 97 relevant reviews were scanned. Grey literature (i.e., unpublished or difficult to locate studies)  
30  
31 98 was searched using the Canadian Agency for Drugs and Technologies in Health's Grey Matters  
32  
33 99 checklist [11].  
34  
35  
36

### 37 100 Eligibility criteria

38  
39 101 The population of interest was studies of older adults, with a mean age of 60 years or older. The  
40  
41 102 core concept examined was the relationship between falls and subsequent social isolation,  
42  
43 103 loneliness. As mentioned in our related systematic review on interventions for social isolation  
44  
45 104 after falling, social isolation and loneliness are distinct concepts [12]. We defined social isolation  
46  
47 105 as including any of the following: decreased number of social contacts, decreased feeling of  
48  
49 106 belonging, reduced or lack of fulfilling relationships, decreased engagement with others, and  
50  
51 107 reduced quality of the members in one's network [12]. We defined loneliness as "the unpleasant  
52  
53  
54  
55  
56  
57  
58  
59  
60

1  
2  
3 108 experience that occurs when a person's network of social relations is deficient in some way,  
4  
5 109 either quantitatively or qualitatively"[13]. The context included any community or institutional  
6  
7  
8 110 setting, and for our secondary objective, this was limited to the COVID-19 context (i.e., studies  
9  
10 111 that specified consideration of the COVID-19 pandemic in their work). Studies including  
11  
12 112 participants reporting a history of falling (i.e., regardless of the proportion of the sample who  
13  
14 113 fell), the role of fear of falling in this relationship, as well as any risk or protective factors were  
15  
16 114 considered eligible for inclusion.

17  
18  
19 115 Eligible study designs included primary research studies of experimental (e.g.,  
20  
21 116 randomized controlled trials), quasi-experimental (eg, non-randomized controlled trials,  
22  
23 117 controlled before and after studies, interrupted time series), observational (e.g., cohort studies,  
24  
25 118 case-control studies, cross-sectional studies), qualitative (phenomenological, ethnography,  
26  
27 119 qualitative interview, etc.) and mixed method (e.g., convergent parallel, embedded, explanatory  
28  
29 120 sequential) design. No restrictions based on study year, language of publication, or study  
30  
31 121 duration were applied.

### 32 33 34 35 122 Study selection

36  
37  
38 123 A screening form was developed based on the eligibility criteria, and those contributing to article  
39  
40 124 reviews/extraction completed a training exercise using 50 citations to ensure adequate agreement  
41  
42 125 was achieved. After achieving 80% agreement during the training exercise, all remaining titles  
43  
44 126 and abstracts identified in the search were screened independently by pairs of reviewers (SMT,  
45  
46 127 AP, JF, GM, AH). All discrepancies were resolved by a third reviewer.

47  
48  
49 128 Similarly, a training exercise was completed for screening of full-text articles. After  
50  
51 129 completing two training exercises (achieving 27% and 40% agreement, respectively), and then  
52  
53  
54  
55  
56  
57  
58  
59  
60

130 revising our screening criteria form for clarity, full-text articles were assigned to independent  
 131 pairs of reviewers, and any discrepancies were resolved by a third reviewer.

### 132 Data charting

133 A charting form was developed to capture data on study characteristics, population  
 134 characteristics and outcomes of interest. Relevant outcomes included any data illustrating the  
 135 relationship between falls and subsequent social isolation, including the role of fear of falling,  
 136 and other risk factors or protective factors. A training pilot exercise was conducted using five  
 137 studies. After achieving sufficient agreement based on discussion with the team and a systematic  
 138 review methodologist, full data charting was completed by independent pairs of reviewers and  
 139 discrepancies were resolved by a third reviewer.

### 140 Analysis and presentation of results

141 The review findings were summarized descriptively using summary tables.

## 142 **RESULTS**

143 After screening 4993 citations and 304 full-text articles against our eligibility criteria, 39 studies  
 144 were identified as eligible for inclusion based on our primary objective for this review (Figure 1).  
 145 No studies were identified when limiting to the COVID-19 context for our secondary objective.  
 146 Study and patient characteristics have been summarized in Table 1 and detailed data are reported  
 147 in Appendices 2 and 3.

148 Table 1: Summary of study and patient characteristics

| Characteristics                     | Number (%) |
|-------------------------------------|------------|
| <b>Study Characteristics (n=39)</b> |            |
| <b>Geographical region</b>          |            |
| Asia                                | 5 (12.8%)  |
| Australia                           | 1 (2.5%)   |
| Europe                              | 17 (43.6%) |
| North America                       | 13 (33.3%) |
| South America                       | 3 (7.7%)   |

|                                                                                |                                   |
|--------------------------------------------------------------------------------|-----------------------------------|
| <b>Study design</b>                                                            |                                   |
| Cohort                                                                         | 6 (13.8%)                         |
| Cross-sectional                                                                | 26 (66.7%)                        |
| Qualitative                                                                    | 7 (19.4%)                         |
| <b>Study duration</b>                                                          |                                   |
| NA                                                                             | 29 (74.3%)                        |
| ≤ 1 year                                                                       | 5 (12.8%)                         |
| ≥ 1 year                                                                       | 5 (12.8%)                         |
| <b>Patient characteristics</b>                                                 |                                   |
| <b>Mean age</b>                                                                | 74.9 (range, 65.0 to 95.0)        |
| NR                                                                             | 11 (28.2%)                        |
| 65.0-69.9 years                                                                | 4 (10.2%)                         |
| 70.0-74.9 years                                                                | 8 (20.5%)                         |
| 75.0-79.9 years                                                                | 14 (35.9%)                        |
| ≥80.0 years                                                                    | 2 (5.1%)                          |
| <b>Proportion of female participants</b>                                       | Mean: 65.3% (range, 42.5 to 88.9) |
| <b>Sample size</b>                                                             | Mean: 3043.6 (9 to 43487)         |
| <100                                                                           | 11 (28.2%)                        |
| 100-499                                                                        | 11 (28.2%)                        |
| 500-999                                                                        | 3 (7.7%)                          |
| 1000-1999                                                                      | 4 (10.2%)                         |
| 2000-5000                                                                      | 4 (10.2%)                         |
| >5000                                                                          | 6 (15.4%)                         |
| <b>Study setting</b>                                                           |                                   |
| Community                                                                      | 31 (79.4%)                        |
| Medical                                                                        | 6 (15.4%)                         |
| Nursing home                                                                   | 1 (2.5%)                          |
| Multi-site                                                                     | 1 (2.5%)                          |
| <b>Participants living alone</b>                                               | 44.1% (range, 0 to 100)           |
| <b>Participants with a history of falling</b>                                  | Mean: 50.8% (range, 11.2 to 100)  |
| Not reported*                                                                  | 11 (28.2%)                        |
| ≤25%                                                                           | 6 (15.4%)                         |
| 25-40%                                                                         | 10 (25.6%)                        |
| 40-85%                                                                         | 5 (12.8%)                         |
| >85%                                                                           | 7 (17.9%)                         |
| <b>Abbreviations:</b> NA, not applicable; *not reported for the overall sample |                                   |

#### 149 Study characteristics

150 The publication year for included studies ranged from 1987 to 2020, with more than half  
 151 published since 2010. Most studies were conducted in Europe (17/39, 44%) and North America  
 152 (13/39, 33%). More than half of the studies were cross-sectional study design (66.7%) and 7

153 qualitative studies were included. Most were conducted in the community (79%). Studies utilized  
 154 15 different scales and a variety of self reported responses to assess variables such as social  
 155 isolation, loneliness. (e.g., 18-item Lubben Social Network Scale, 6-item de Jong-Gierveld  
 156 Loneliness Scale). Six studies identified risk factors for social isolation and for activity  
 157 restriction due to fear of falling (Table 2). Six studies reported mental health outcomes  
 158 (Appendix 4).

159 Table 2: Potential risk factors for social isolation and activity restriction associated with fear of  
 160 falling

| Author, Year                                       | Risk factor                                | Associated evidence                                                                                                                                                          |
|----------------------------------------------------|--------------------------------------------|------------------------------------------------------------------------------------------------------------------------------------------------------------------------------|
| <b>Social Isolation after injurious fall</b>       |                                            |                                                                                                                                                                              |
| Nicholson, 2005                                    | Sex (female)                               | The authors noted a strong positive correlation between injurious falls and social isolation for women ( $\rho = -0.5$ ; $p = 0.01$ ), but this was not significant for men. |
| <b>Activity Restriction due to fear of falling</b> |                                            |                                                                                                                                                                              |
| Zijlstra, 2007                                     | Aged 80 years or older                     | OR: 1.56 (95% CI, 1.24-1.95)                                                                                                                                                 |
|                                                    | Fair perceived general health              | OR: 2.92 (95% CI, 2.43-3.52)                                                                                                                                                 |
|                                                    | Poor perceived general health              | OR: 5.7 (95% CI, 3.57-9.12)                                                                                                                                                  |
| Curcio, 2009                                       | Poor perceived health                      | OR: 1.38 (95% CI, 1.06-1.79)                                                                                                                                                 |
|                                                    | Depression                                 | OR: 1.76 (95% CI, 1.38-2.24)                                                                                                                                                 |
|                                                    | Low social participation                   | OR: 1.52 (95% CI, 1.20-1.92)                                                                                                                                                 |
|                                                    | Difficulties in activities of daily living | OR: 1.65 (95% CI, 1.16-2.32)                                                                                                                                                 |
|                                                    | Decreased physical activity                | OR: 1.35 (95% CI, 1.06-1.70)                                                                                                                                                 |
|                                                    | Polypharmacy                               | OR: 1.56 (95% CI, 1.14-2.14)                                                                                                                                                 |
|                                                    | Below poverty level                        | OR: 1.32 (95% CI, 1.05-1.65)                                                                                                                                                 |
| Dias, 2011                                         | Depression                                 | Chi-square=15.2, $p = 0.004$                                                                                                                                                 |
|                                                    | Exhaustion (frailty)                       | Chi-square=9.2, $p = 0.01$                                                                                                                                                   |
|                                                    | Participation in social activities         | Chi-square=10.4, $p = 0.016$                                                                                                                                                 |
| Murphy, 2002                                       | Two or more chronic conditions             | ARR: 1.34 (95% CI, 1.08-1.65)                                                                                                                                                |
|                                                    | Slow-timed physical performance            | ARR: 1.44 (95% CI, 1.18-1.75)                                                                                                                                                |

|                |            |                               |
|----------------|------------|-------------------------------|
| Merchant, 2020 | Sarcopenia | OR, 8.13 (95% CI, 1.52–43.41) |
|----------------|------------|-------------------------------|

Abbreviations: OR, odds ratio; ARR, adjusted risk ratio

### Patient characteristics

Across all studies, the total number of included patients was 118,702, with an average of 3,043 patients per study. Their mean age ranged from 65 to 95 years, and approximately 65% of patients were female. Most studies included participants with a history of falling, ranging from 11 to 100 percent of the study population.

### Cohort studies

Among the 39 included studies, six were cohort studies (Appendix 5). Tinetti et al (1998) demonstrated a significant relationship between experiencing multiple non-injurious falls and a decline in social functioning (Regression coefficient = -0.538 (p<0.05)), which was measured using the Social Activity scale, in a sample of 770 older adults after 3 years of follow-up [14]. Similarly, Pin et al. (2016) found that in their cohort of 16,583 participants, individuals who experienced a fall showed decreased social participation after falling (p<0.001), which was no longer statistically significant when frailty was added in the model [15].

Vellas et al. (1987) compared people who fall to people who had not experienced a fall in two populations: a retirement home (n=118) and older adults living at home (n=60) [16]. Among the older adults who lived at home, they noted that fewer fallers were able to maintain the same level of activity after 6 months of follow-up when compared to non-fallers (p<0.02).

Van der Meulen et al. (2014) assessed social participation (using the Frenchay Activities Index) in 260 older adults with low and high levels of concern about falling over a 14-month period [17]. They reported significant differences (specific results not reported) between the

1  
2  
3 182 groups, with lower social participation scores in those who had a higher level of concern about  
4  
5 183 falling.

6  
7  
8 184 In 4,680 older adults, Yu et al. (2021) reported a statistically significant relationship  
9  
10 185 between the number of falls and loneliness scores (measured using the 3 item University of  
11  
12 186 California, Los Angeles (UCLA) Loneliness Scale) across three time points over a 4-year period  
13  
14 187 ( $B = 0.008$ ,  $p < 0.05$ ) [18]. A cohort study by Hajek et al. (2020) looked at loneliness (as measured  
15  
16 188 using the Bude and Lantermann scale) and social isolation (measured using the De Jong Gierveld  
17  
18 189 Loneliness Scale) and their link to fear of falling 669 older adults [19]. They compared older  
19  
20 190 adults with an onset of fear of falling, to those whose fear of falling had ended. Their findings  
21  
22 191 revealed that the end of fear of falling was associated with lower loneliness scores ( $\beta = -0.06$ ,  
23  
24 192  $p < 0.05$ ) and other negative psychosocial outcomes (e.g., increased depressive symptoms).

### 25 26 27 28 193 Cross-sectional studies related to falls and social isolation

29  
30  
31 194 Of the twenty-six cross-sectional studies included in this review, 11 reported on the relationship  
32  
33 195 between falls and social isolation or loneliness (Appendix 6).

34  
35 196 Quach et al. (2016) examined the relationship between falls and scores on the Social  
36  
37 197 Relationship Index including 8,464 participants [20]. They noted that participants who reported  
38  
39 198 experiencing a fall or multiple falls had a lower social relationship index score (mean, 3.24 and  
40  
41 199 3.08 respectively) compared to those who had not fallen (mean, 3.34;  $p < 0.0001$ ).

42  
43  
44 200 Hajek et al (2017) examined variables associated with a history of falling in 7,808  
45  
46 201 participants [21]. They found those reporting a fall in the previous 12 months had higher  
47  
48 202 loneliness scores (De Jong Gierveld Loneliness Scale;  $\beta = .08$ ,  $p < .001$ ) and social exclusion  
49  
50 203 scores (Bude and Lantermann scale;  $\beta = .08$ ,  $p < .001$ ) compared to those who had not fallen.  
51  
52  
53  
54  
55  
56  
57  
58  
59  
60

1  
2  
3 204 Schnittger et al. (2012) conducted a study in 579 older adults identifying risk factors for  
4  
5 205 different pathways of loneliness – emotional loneliness, social loneliness (both measured using  
6  
7 206 the De Jong Gierveld Loneliness Scale), and social support (measured using the Lubben Social  
8  
9 207 Network Scale) [22]. A history of falls was the only biological variable that was identified as a  
10  
11 208 statistically significant risk factor for inclusion in the model for social support (correlation  
12  
13 209 coefficient= -0.247;  $p < 0.003$ ).

14  
15  
16  
17 210 Stel et al (2004) reported a statistically significant decline in social activities in 204 older  
18  
19 211 adults who experienced a fall inside their home (OR: 2.6 (95% CI: 1.1-6.5);  $p < 0.05$ ) [23], and  
20  
21 212 Vanden Wyngaert et al. (2020) reported an association between risk of falls and participation in  
22  
23 213 social roles and activities in 154 older adult haemodialysis patients (PROMIS questionnaire;  
24  
25 214  $R^2 = 0.11$ ;  $p = 0.01$ ) [24]. Finally, Nicholson et al. (2005) reported a strong positive relationship  
26  
27 215 between experiencing an injurious fall and increasing social isolation in a sample of 68 older  
28  
29 216 adults (Lubben Social Network Scale;  $\rho = -0.4$ ;  $p < 0.05$ ), and highlighted that this relationship  
30  
31 217 was stronger in women ( $\rho = -0.5$ ;  $p = 0.01$ ) [25]. Additionally, they assessed this relationship using  
32  
33 218 both the Family and Friends subscales of the Lubben Social Network Scale and found that the  
34  
35 219 correlation was specific to the Friends subscale ( $\rho = -0.43$ ;  $p < 0.05$ ).

36  
37  
38  
39 220 Iliffe et al. (2007) and Robins et al. (2018) found no statistically significant associations  
40  
41 221 between falls and social isolation using the Lubben Social Network Scale in a sample of 3,139  
42  
43 222 older adults and the Friendship Scale for social isolation in a sample of 245 older adults,  
44  
45 223 respectively [26, 27]. Similarly, Van Lankveld et al. (2011) and Faria et al. (2020) found no  
46  
47 224 correlation between falls and loneliness, using the De Jong Gierveld Loneliness scale in a sample  
48  
49 225 of 579 older adults, and the UCLA scale in a sample of 48 older adults, respectively [28, 29].  
50  
51  
52  
53  
54  
55  
56  
57  
58  
59  
60



226 Additionally, Finn et al. (2001) noted no difference in scores for the OARS social support scale  
227 when comparing fallers to non-fallers in a nursing home setting (n=49) [30].

#### 228 Cross-sectional studies related to fear of falling and social isolation

229 Seven studies examined fear of falling linked to falls and social isolation (Appendix 7). Gagnon  
230 et al. (2005) reported a statistically significant positive relationship between fear of falling and  
231 social support in a sample of 105 older adults (measured using the confiding-relationships  
232 component of the Bedford Life Events and Difficulties Schedule modified for elderly subjects;  
233 Wald chi-square= 3.77; p=0.05) [31]. Curcio et al. (2009) reported a strong relationship between  
234 fear of falling and low social participation in 1,668 older adults (OR, 1.52; 95% CI, 1.20-1.92;  
235 p<0.01) [32]. Petrincic et al. (2020) identified fear of falling as an independent predictor of social  
236 functioning (as measured by the Medical Outcomes Study 36-item Short-Form General Health  
237 Survey;  $\beta$ = -0.29) in 108 older adults [33].

238 Merchant et al. (2020) and Iliffe et al. (2007) showed no statistically significant  
239 relationship between fear of falling and social isolation in 493 older adults and 3,139 older  
240 adults, respectively [26, 34]. Ferreira et al. (2018) and Kara et al. (2009) showed no association  
241 between fear of falling and social participation (n= 7,935) or fear of falling and loneliness  
242 (n=47), respectively [35, 36].

#### 243 Cross-sectional studies related to falls and activity restriction due to fear of falling

244 Eight studies examined the relationship between falls and activity restriction due to fear of  
245 falling (Appendix 7). Tinetti et al (1994) and Apikommonkon et al. (2003) both reported a  
246 statistically significant decrease in activity due to fear of falling in individuals who experienced a  
247 fall compared to those who had not (n=1,103, chi-square= 13.1, p < 0.001; and n=546, chi-  
248 square=5.49, p<0.05, respectively) [37, 38]. Similarly, in 1,668 older adults, Curcio et al. (2009)

1  
2  
3 249 demonstrated that those who restricted activity due to fear of falling were more likely to have  
4  
5 250 experienced a fall in the year prior (OR: 1.48 (95%CI, 1.18-1.86); p=0.001) [32], and Mendes da  
6  
7 251 Costa et al. (2012) demonstrated that activity restriction increased in those with multiple falls  
8  
9 252 over the past year (OR, 3.04; 95% CI, 1.70-5.42) [39]. Murphy et al. (2002) , and Choi et al.  
10  
11 253 (2015) showed that a history of injurious falls was independently associated with activity  
12  
13 254 restriction due to fear of falling (n=1,064, ARR: 1.36; 95% CI, 1.11-1.66; p=0.003; and n=4,247,  
14  
15 255 OR, 3.03; 95% CI, 1.21-7.54, p=0.008, respectively) [40, 41].  
16  
17  
18

19 256 Howland et al. (1998) reported no relationship between the experience of a fall and  
20  
21 257 activity restriction in a sample of 266 older adults (OR: 1.094; 95% CI, 0.376-3.177;  
22  
23 258 p=0.869)[42], as did Choi et al. (2015) (OR, 2.12; 95% CI, 0.96-4.67; p=0.062) among 4,247  
24  
25 259 older adults [41]. Similarly, Merchant et al. (2020) also reported no significant relationship  
26  
27 260 between the number of falls and fear-based activity restriction in 493 older adults (OR, 1.4; 95%  
28  
29 261 CI, 0.94–2.20)[34].  
30  
31  
32

### 33 262 Qualitative studies

34  
35 263 Seven qualitative studies were included (Appendix 8). All participants interviewed were older  
36  
37 264 adults (n=124), and of that aggregated group, 51 were stroke survivors [43, 44] and 10 were  
38  
39 265 experiencing frailty [45]. Common categories identified across these studies include: activity  
40  
41 266 restriction as a strategy to manage fear of falling, changing behaviours to avoid falling again [43,  
42  
43 267 45-47], feeling restricted due to reduced mobility after falling [43, 44, 48], increasing  
44  
45 268 dependence on caregivers [43, 45], developing fear of falling [43, 45], feelings of loneliness or  
46  
47 269 isolation [43, 48], and a negative impact on identity or autonomy [47].  
48  
49  
50

## 51 270 **DISCUSSION**

1  
2  
3 271 We conducted a comprehensive scoping review including 39 studies examining the relationship  
4  
5 272 between falls and subsequent social isolation. We limited the scoping review to studies that  
6  
7  
8 273 identified social isolation after a fall, although many studies investigated the association between  
9  
10 274 social isolation and a subsequent fall; this was due to the request of the commissioning  
11  
12 275 knowledge user. More than half of the studies were published since 2010, suggesting increased  
13  
14 276 interest in the relationship between falls and social isolation in older adults. Social isolation and  
15  
16 277 loneliness were measured using a variety of outcome measures across studies, such as degree of  
17  
18 278 activity, and varying scales for loneliness, social isolation, social participation, social support,  
19  
20 279 etc. This highlights the growing need for consistency in the measurement of social isolation and  
21  
22  
23 280 loneliness to allow for meaningful comparison across studies.

26 281 Only a few studies examined risk factors and mental health outcomes related to falls and  
27  
28 282 subsequent social isolation. Risk factors linked to social isolation and activity restriction  
29  
30  
31 283 included age, sex/gender, poor perceived health, poverty, frailty, and comorbidity. Few studies  
32  
33 284 also documented an association between activity restriction due to fear of falling and depression.  
34  
35 285 Our findings suggest the presence of gaps in the literature for these important outcomes,  
36  
37 286 highlighting the need for further research.

40 287 We did not identify any studies on falls and subsequent social isolation that were specific  
41  
42 288 to the COVID-19 context, highlighting another gap in the evidence base. Particularly as  
43  
44 289 lockdowns related to the pandemic are likely to cause social isolation for older adults. Closing of  
45  
46 290 community centers could risk deconditioning of older adults and lead to an increase in falls as  
47  
48 291 things re-open.

51 292 There are several strengths to our scoping review, such as the use of the JBI guide for the  
52  
53 293 methods, and the PRISMA-ScR for structuring and writing the results. Included studies were  
54  
55  
56  
57  
58  
59  
60

1  
2  
3 294 gathered through a thorough and extensive literature search from numerous databases and grey  
4  
5 295 literature sources to ensure relevant studies were included. Several different types of study  
6  
7  
8 296 designs were included, such as cohort, cross-sectional and qualitative studies. However,  
9  
10 297 limitations include that all studies were conducted in middle-high- or high-income economy  
11  
12 298 countries. This suggests that our results may not be generalizable to low- and middle-income  
13  
14 299 countries, highlighting a gap in the literature. It should be noted that as many of the included  
15  
16  
17 300 studies were cross-sectional, we cannot confirm the directional causality between falls and social  
18  
19 301 isolation without more robust research.

20  
21 302 In summary, we identified 39 studies examining social isolation after a fall in older  
22  
23 303 adults. We found a dearth of research, particularly examining risk factors and mental health  
24  
25  
26 304 outcomes. Further research is warranted in this area, given the importance of falls and social  
27  
28 305 isolation to the health of older adults.  
29  
30  
31  
32  
33  
34  
35  
36  
37  
38  
39  
40  
41  
42  
43  
44  
45  
46  
47  
48  
49  
50  
51  
52  
53  
54  
55  
56  
57  
58  
59  
60

1  
2  
3 306 **LIST OF ABBREVIATIONS**  
4

5 307 ARR Absolute Risk Reduction  
6

7  
8 308 CADTH Canadian Agency for Drugs and Technologies in Health  
9

10 309 CI Confidence interval  
11

12 310 OR Odds Ratio  
13

14  
15 311 PRESS Peer Review of Electronic Search Strategies  
16

17 312 PRISMA Preferred Reporting Items for Systematic Reviews and Meta-Analyses  
18  
19  
20

21 313 **DECLARATIONS**  
22

23  
24 314 Funding  
25

26 315 This project was commissioned and funded by the Public Health Agency of Canada  
27

28 316 [4500415303] through the query services of the SPOR Evidence Alliance. The SPOR Evidence  
29

30  
31 317 Alliance is supported by the Canadian Institutes of Health Research (CIHR) under Canada's  
32

33 318 Strategy for Patient-Oriented Research (SPOR) initiative, and the generosity of partners from 41  
34

35 319 public agencies and organizations across Canada who have made cash or in-kind contributions.  
36

37 320 Dr. Tricco is funded by a Tier 2 Canada Research Chair in Knowledge Synthesis [17-0126-  
38

39 321 AWA], and Dr. Straus is funded by a Tier 1 Canada Research Chair in Knowledge Translation  
40

41  
42 322 [17-0245-SUB].  
43

44 323 Ethics approval  
45

46 324 Not required.  
47  
48

49 325 Consent for publication  
50

51 326 Not applicable.  
52

53  
54 327 Availability of data and materials  
55  
56  
57  
58  
59  
60

1  
2  
3 328 The full dataset is available from the corresponding author upon reasonable request.  
4

5 329 Conflict of interests  
6

7  
8 330 All authors do not have any potential (or perceived) conflicts of interest.  
9

10 331 Author Contribution  
11

12 332 ACT and ST wrote and revised the final manuscript. All authors revised the manuscript and  
13  
14 333 approved of the final version. ST, AP, AH, JF, GM, JW screened citations and full text articles,  
15  
16 334 abstracted and verified data. ST interpreted results and ST and AP wrote the first draft  
17  
18 335 manuscript. ACT developed the protocol, obtained funding, interpreted results, and edited the  
19  
20 336 manuscript.  
21  
22

23  
24 337 Role of the funder  
25

26 338 The funders were co-developers of this research project and contributed to the design of the  
27  
28 339 study and reviewed/approved of the manuscript.  
29

30  
31 340 Acknowledgements  
32

33 341 We thank Alissa Epworth for running the searches, de-duplicating results and obtaining full-text  
34  
35 342 articles. We also thank Katrina Chiu and Faryal Khan for their support with formatting the  
36  
37 343 manuscript and creating tables and appendices.  
38  
39  
40  
41

42 344 **SUPPLEMENTAL FILES**  
43

44 345 Supplemental File 1: PRISMA Checklist  
45

46  
47 346 Supplemental File 2: Appendices  
48  
49  
50  
51  
52  
53  
54  
55  
56  
57  
58  
59  
60

## REFERENCES

1. World Health Organization. Falls. 2021, April 26; Available from: <https://www.who.int/news-room/fact-sheets/detail/falls>.
2. Public Health Agency of Canada. Seniors' Falls in Canada: Second Report. 2014.
3. Terroso M, Rosa N, Marques AT, Simoes R. Physical consequences of falls in the elderly: a literature review from 1995 to 2010. *Eur Rev Aging Phys Act*. 2014;11(1):51-9.
4. Keefe J, Andrew M, Fancey P, Hall M. A profile of social isolation in Canada. Report submitted to the F/P/T Working Group on Social Isolation Province of British Columbia and Mount Saint Vincent University. 2006.
5. Government of Canada. Report on the Social Isolation of Seniors. 2016, July 20.
6. Tricco A, Thomas SM, Ramkissoon N, Mitchell G, Fortune J, Watt J, et al. Falls and social isolation in older adults. 2021; Available from: <https://osf.io/2r8hm>.
7. Kothari A, McCutcheon C, Graham ID. Defining integrated knowledge translation and moving forward: a response to recent commentaries. *Int J Health Policy Manag*. 2017;6(5):299.
8. Tricco AC, Lillie E, Zarin W, O'Brien KK, Colquhoun H, Levac D, et al. PRISMA extension for scoping reviews (PRISMA-ScR): checklist and explanation. *Ann Intern Med*. 2018;169(7):467-73.
9. Page MJ, McKenzie JE, Bossuyt PM, Boutron I, Hoffmann TC, Mulrow CD, et al. The PRISMA 2020 statement: an updated guideline for reporting systematic reviews. *BMJ*. 2021;372.
10. McGowan J, Sampson M, Salzwedel DM, Cogo E, Foerster V, Lefebvre C. PRESS peer review of electronic search strategies: 2015 guideline statement. *J Clin Epidemiol*. 2016;75:40-6.
11. Canadian Agency for Drugs Technologies in Health. Grey Matters: a practical tool for searching health-related grey literature (Internet). 2018.
12. Tricco A, Thomas SM, Radhakrishnan A, Ramkissoon N, Mitchell G, Fortune J, et al. Interventions for social isolation in older adults who have experienced a fall: A systematic review [Manuscript submitted for publication]. *BMJ Open*. 2022.
13. Perlman D, Peplau LA. Toward a social psychology of loneliness. *Pers Relatsh*. 1981;3:31-56.
14. Tinetti ME, Williams CS. The effect of falls and fall injuries on functioning in community-dwelling older persons. *J Gerontol A Biol Sci Med Sci*. 1998 Mar;53(2):M112-9.
15. Pin S, Spini D. Impact of falling on social participation and social support trajectories in a middle-aged and elderly European sample. *SSM Popul Health*. 2016 Dec;2:382-9.
16. Vellas B, Cayla F, Bocquet H, de Pemille F, Albaredo JL. Prospective study of restriction of activity in old people after falls. *Age Ageing*. 1987 May;16(3):189-93.
17. van der Meulen E, Zijlstra GA, Ambergen T, Kempen GI. Effect of fall-related concerns on physical, mental, and social function in community-dwelling older adults: a prospective cohort study. *J Am Geriatr Soc*. 2014 Dec;62(12):2333-8.
18. Yu K, Wu S, Jang Y, Chou CP, Wilber KH, Aranda MP, et al. Longitudinal Assessment of the Relationships Between Geriatric Conditions and Loneliness. *J Am Med Dir Assoc*. 2021 May;22(5):1107-13.e1.
19. Hajek A, König HH. What are the psychosocial consequences when fear of falling starts or ends? Evidence from an asymmetric fixed effects analysis based on longitudinal data from the general population. *Int J Geriatr Psychiatry*. 2020 Sep;35(9):1028-35.



20. Quach LT. Social Determinants of Falls: The Role of Social Support and Depression Among Community-Dwelling Older Adults. *Dissertation Abstracts International: Section B: The Sciences and Engineering* 2018; 78(8-B(E)):No Pagination Specified. 2016.
21. Hajek A, König HH. The association of falls with loneliness and social exclusion: evidence from the DEAS German Ageing Survey. *BMC Geriatr.* 2017 Sep 5;17(1):204.
22. Schnittger RI, Wherton J, Prendergast D, Lawlor BA. Risk factors and mediating pathways of loneliness and social support in community-dwelling older adults. *Aging Ment Health.* 2012;16(3):335-46.
23. Stel VS, Smit JH, Pluijm SM, Lips P. Consequences of falling in older men and women and risk factors for health service use and functional decline. *Age Ageing.* 2004 Jan;33(1):58-65.
24. Vanden Wyngaert K, Van Craenenbroeck AH, Eloot S, Calders P, Celie B, Holvoet E, et al. Associations between the measures of physical function, risk of falls and the quality of life in haemodialysis patients: a cross-sectional study. *BMC Nephrol.* 2020 Jan 6;21(1):7.
25. Nicholson Jr NR. The relationship between injurious falls, fear of falling, social isolation and depression. 2005.
26. Iliffe S, Kharicha K, Harari D, Swift C, Gillmann G, Stuck AE. Health risk appraisal in older people 2: the implications for clinicians and commissioners of social isolation risk in older people. *Br J Gen Pract.* 2007;57(537):277.
27. Robins LM, Hill KD, Finch CF, Clemson L, Haines T. The association between physical activity and social isolation in community-dwelling older adults. *Aging Ment Health.* 2018 Feb;22(2):175-82.
28. van Lankveld W, Fransen M, van den Hoogen F, den Broeder A. Age-related health hazards in old patients with first-time referral to a rheumatologist: a descriptive study. *Arthritis.* 2011;2011:823527.
29. Faria A, Martins M, Ribeiro O, Gomes BP, Fernandes C. Elderly residents in the community: gaining knowledge to support a rehabilitation nursing program. *Rev Bras Enferm.* 2020;73Suppl 3(Suppl 3):e20200194.
30. Finn JM. The relationship between falls and fall-related efficacy, depression, and social resources: *Adler School of Professional Psychology*; 2001.
31. Gagnon N, Flint AJ, Naglie G, Devins GM. Affective correlates of fear of falling in elderly persons. *Am J Geriatr Psychiatry.* 2005 Jan;13(1):7-14.
32. Curcio CL, Gomez F, Reyes-Ortiz CA. Activity restriction related to fear of falling among older people in the Colombian Andes mountains: are functional or psychosocial risk factors more important? *J Aging Health.* 2009 Jun;21(3):460-79.
33. Petrinc AB, Crowe ML, Flanagan SK, Baker J. Health-related Quality of Life of Older Women Religious: Negative Influence of Frailty. *West J Nurs Res.* 2020 Dec;42(12):1088-96.
34. Merchant RA, Chen MZ, Wong BLL, Ng SE, Shirooka H, Lim JY, et al. Relationship Between Fear of Falling, Fear-Related Activity Restriction, Frailty, and Sarcopenia. *J Am Geriatr Soc.* 2020 Nov;68(11):2602-8.
35. Ferreira FR, César CC, Andrade FB, Souza Junior PRB, Lima-Costa MF, Proietti FA. Aspects of social participation and neighborhood perception: ELSI-Brazil. *Rev Saude Publica.* 2018 Oct 25;52Suppl 2(Suppl 2):18s.
36. Kara B, Yildirim Y, Genc A, Ekizler S. Assessment of home environment and life satisfaction in geriatrics and relation to fear of falling. *Turk J Physiother Rehabil.* 2009;20(3):190-200.



- 1  
2  
3 37. Tinetti ME, Mendes de Leon CF, Doucette JT, Baker DI. Fear of falling and fall-related  
4 efficacy in relationship to functioning among community-living elders. *J Gerontol.* 1994  
5 May;49(3):M140-7.  
6  
7 38. Apikommon H. Fear of falling and fall circumstances in Thailand: Curtin University;  
8 2003.  
9  
10 39. Mendes da Costa E, Pepersack T, Godin I, Bantuelle M, Petit B, Levêque A. Fear of  
11 falling and associated activity restriction in older people. results of a cross-sectional study  
12 conducted in a Belgian town. *Arch Public Health.* 2012 Jan 3;70(1):1.  
13  
14 40. Murphy SL, Williams CS, Gill TM. Characteristics associated with fear of falling and  
15 activity restriction in community-living older persons. *J Am Geriatr Soc.* 2002 Mar;50(3):516-  
16 20.  
17  
18 41. Choi K, Ko Y. Characteristics Associated With Fear of Falling and Activity Restriction  
19 in South Korean Older Adults. *J Aging Health.* 2015 Sep;27(6):1066-83.  
20  
21 42. Howland J, Lachman ME, Peterson EW, Cote J, Kasten L, Jette A. Covariates of fear of  
22 falling and associated activity curtailment. *Gerontologist.* 1998 Oct;38(5):549-55.  
23  
24 43. Schmid AA, Rittman M. Consequences of poststroke falls: activity limitation, increased  
25 dependence, and the development of fear of falling. *Am J Occup Ther.* 2009;63(3):310-6.  
26  
27 44. Xu T, O'Loughlin K, Clemson L, Lannin NA, Dean C, Koh G. Developing a falls  
28 prevention program for community-dwelling stroke survivors in Singapore: client and caregiver  
29 perspectives. *Disabil Rehabil.* 2019;41(9):1044-54.  
30  
31 45. Faes MC, Reelick MF, Joosten-Weyn Banningh LW, Gier Md, Esselink RA, Olde  
32 Rikkert MG. Qualitative study on the impact of falling in frail older persons and family  
33 caregivers: foundations for an intervention to prevent falls. *Aging Ment Health.* 2010;14(7):834-  
34 42.  
35  
36 46. Meltem M, Oflaz, Ç Fahriye. A Qualitative Study on the Perception of Elderly about fear  
37 of falling and it's impact on daily life. *Turk Geriatri Derg.* 2007;10(1):19-23.  
38  
39 47. Høst D, Hendriksen C, Borup I. Older people's perception of and coping with falling, and  
40 their motivation for fall-prevention programmes. *Scand J Public Health.* 2011;39(7):742-8.  
41  
42 48. Chiu MW-Y. Psychosocial responses to falling in older Chinese immigrants living in the  
43 community 2010.  
44  
45  
46  
47  
48  
49  
50  
51  
52  
53  
54  
55  
56  
57  
58  
59  
60

1  
2  
3 347 **FIGURE LEGEND:**  
4

5 348 Figure 1 – PRISMA 2020 study flow diagram.  
6  
7  
8  
9  
10  
11  
12  
13  
14  
15  
16  
17  
18  
19  
20  
21  
22  
23  
24  
25  
26  
27  
28  
29  
30  
31  
32  
33  
34  
35  
36  
37  
38  
39  
40  
41  
42  
43  
44  
45  
46  
47  
48  
49  
50  
51  
52  
53  
54  
55  
56  
57  
58  
59  
60

For peer review only

Figure 1: PRISMA 2020 study flow diagram

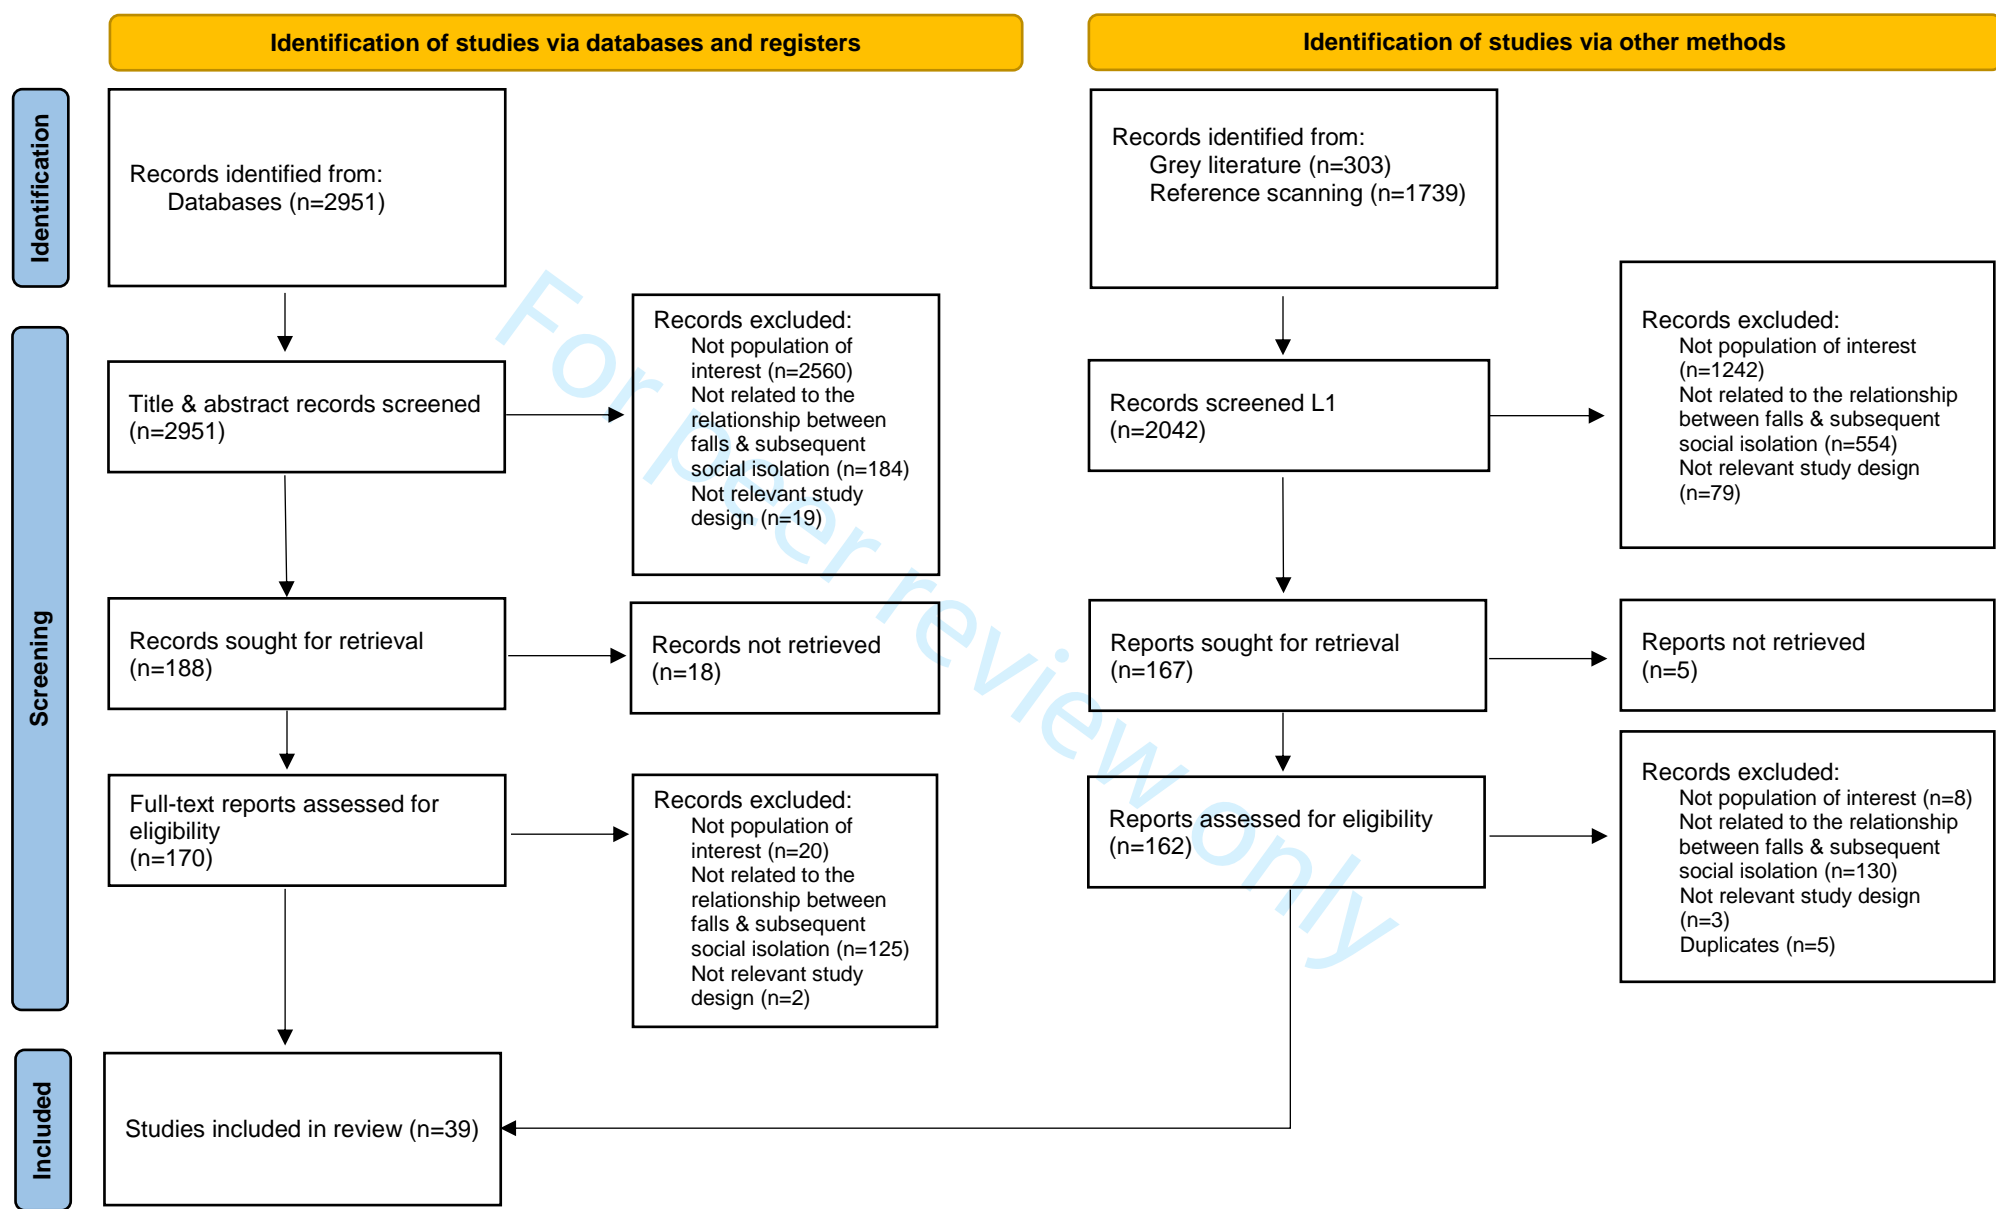

## Preferred Reporting Items for Systematic reviews and Meta-Analyses extension for Scoping Reviews (PRISMA-ScR) Checklist

| SECTION                                               | ITEM | PRISMA-ScR CHECKLIST ITEM                                                                                                                                                                                                                                                                                  | REPORTED ON PAGE # |
|-------------------------------------------------------|------|------------------------------------------------------------------------------------------------------------------------------------------------------------------------------------------------------------------------------------------------------------------------------------------------------------|--------------------|
| <b>TITLE</b>                                          |      |                                                                                                                                                                                                                                                                                                            |                    |
| Title                                                 | 1    | Identify the report as a scoping review.                                                                                                                                                                                                                                                                   | 1                  |
| <b>ABSTRACT</b>                                       |      |                                                                                                                                                                                                                                                                                                            |                    |
| Structured summary                                    | 2    | Provide a structured summary that includes (as applicable): background, objectives, eligibility criteria, sources of evidence, charting methods, results, and conclusions that relate to the review questions and objectives.                                                                              | 3                  |
| <b>INTRODUCTION</b>                                   |      |                                                                                                                                                                                                                                                                                                            |                    |
| Rationale                                             | 3    | Describe the rationale for the review in the context of what is already known. Explain why the review questions/objectives lend themselves to a scoping review approach.                                                                                                                                   | 5                  |
| Objectives                                            | 4    | Provide an explicit statement of the questions and objectives being addressed with reference to their key elements (e.g., population or participants, concepts, and context) or other relevant key elements used to conceptualize the review questions and/or objectives.                                  | 5                  |
| <b>METHODS</b>                                        |      |                                                                                                                                                                                                                                                                                                            |                    |
| Protocol and registration                             | 5    | Indicate whether a review protocol exists; state if and where it can be accessed (e.g., a Web address); and if available, provide registration information, including the registration number.                                                                                                             | 5-6                |
| Eligibility criteria                                  | 6    | Specify characteristics of the sources of evidence used as eligibility criteria (e.g., years considered, language, and publication status), and provide a rationale.                                                                                                                                       | 6-7                |
| Information sources*                                  | 7    | Describe all information sources in the search (e.g., databases with dates of coverage and contact with authors to identify additional sources), as well as the date the most recent search was executed.                                                                                                  | 6                  |
| Search                                                | 8    | Present the full electronic search strategy for at least 1 database, including any limits used, such that it could be repeated.                                                                                                                                                                            | Appendix 1         |
| Selection of sources of evidence†                     | 9    | State the process for selecting sources of evidence (i.e., screening and eligibility) included in the scoping review.                                                                                                                                                                                      | 6                  |
| Data charting process‡                                | 10   | Describe the methods of charting data from the included sources of evidence (e.g., calibrated forms or forms that have been tested by the team before their use, and whether data charting was done independently or in duplicate) and any processes for obtaining and confirming data from investigators. | 7-8                |
| Data items                                            | 11   | List and define all variables for which data were sought and any assumptions and simplifications made.                                                                                                                                                                                                     | 7                  |
| Critical appraisal of individual sources of evidence§ | 12   | If done, provide a rationale for conducting a critical appraisal of included sources of evidence; describe the methods used and how this information was used in any data synthesis (if appropriate).                                                                                                      | N/A                |
| Synthesis of results                                  | 13   | Describe the methods of handling and summarizing the data that were charted.                                                                                                                                                                                                                               | Appendix 4-6       |

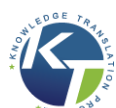

| SECTION                                       | ITEM | PRISMA-ScR CHECKLIST ITEM                                                                                                                                                                       | REPORTED ON PAGE #     |
|-----------------------------------------------|------|-------------------------------------------------------------------------------------------------------------------------------------------------------------------------------------------------|------------------------|
| <b>RESULTS</b>                                |      |                                                                                                                                                                                                 |                        |
| Selection of sources of evidence              | 14   | Give numbers of sources of evidence screened, assessed for eligibility, and included in the review, with reasons for exclusions at each stage, ideally using a flow diagram.                    | 8; Figure 1            |
| Characteristics of sources of evidence        | 15   | For each source of evidence, present characteristics for which data were charted and provide the citations.                                                                                     | 8; Table 1; Appendix 7 |
| Critical appraisal within sources of evidence | 16   | If done, present data on critical appraisal of included sources of evidence (see item 12).                                                                                                      | N/A                    |
| Results of individual sources of evidence     | 17   | For each included source of evidence, present the relevant data that were charted that relate to the review questions and objectives.                                                           | 9-13                   |
| Synthesis of results                          | 18   | Summarize and/or present the charting results as they relate to the review questions and objectives.                                                                                            | Table 2                |
| <b>DISCUSSION</b>                             |      |                                                                                                                                                                                                 |                        |
| Summary of evidence                           | 19   | Summarize the main results (including an overview of concepts, themes, and types of evidence available), link to the review questions and objectives, and consider the relevance to key groups. | 13-14                  |
| Limitations                                   | 20   | Discuss the limitations of the scoping review process.                                                                                                                                          | 14-15                  |
| Conclusions                                   | 21   | Provide a general interpretation of the results with respect to the review questions and objectives, as well as potential implications and/or next steps.                                       | 15                     |
| <b>FUNDING</b>                                |      |                                                                                                                                                                                                 |                        |
| Funding                                       | 22   | Describe sources of funding for the included sources of evidence, as well as sources of funding for the scoping review. Describe the role of the funders of the scoping review.                 | 16-17                  |

JBI = Joanna Briggs Institute; PRISMA-ScR = Preferred Reporting Items for Systematic reviews and Meta-Analyses extension for Scoping Reviews.

\* Where *sources of evidence* (see second footnote) are compiled from, such as bibliographic databases, social media platforms, and Web sites.

† A more inclusive/heterogeneous term used to account for the different types of evidence or data sources (e.g., quantitative and/or qualitative research, expert opinion, and policy documents) that may be eligible in a scoping review as opposed to only studies. This is not to be confused with *information sources* (see first footnote).

‡ The frameworks by Arksey and O'Malley (6) and Levac and colleagues (7) and the JBI guidance (4, 5) refer to the process of data extraction in a scoping review as data charting.

§ The process of systematically examining research evidence to assess its validity, results, and relevance before using it to inform a decision. This term is used for items 12 and 19 instead of "risk of bias" (which is more applicable to systematic reviews of interventions) to include and acknowledge the various sources of evidence that may be used in a scoping review (e.g., quantitative and/or qualitative research, expert opinion, and policy document).

From: Tricco AC, Lillie E, Zarin W, O'Brien KK, Colquhoun H, Levac D, et al. PRISMA Extension for Scoping Reviews (PRISMA-ScR): Checklist and Explanation. *Ann Intern Med.* 2018;169:467–473. doi: 10.7326/M18-0850.

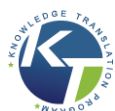

St. Michael's

Inspired Care.  
Inspiring Science.

For peer review only - <http://bmjopen.bmj.com/site/about/guidelines.xhtml>

## Supplementary File 2: Appendices

|                                                                                                                                  |    |
|----------------------------------------------------------------------------------------------------------------------------------|----|
| Appendix 1: Literature search strategies.....                                                                                    | 2  |
| Appendix 2: Study Characteristics (n=39).....                                                                                    | 4  |
| Appendix 3: Patient Characteristics (n=39).....                                                                                  | 8  |
| Appendix 4: Mental health outcomes related to falls, fear of falling, and social isolation (n=6). 15                             |    |
| Appendix 5: Findings from included cohort studies (n=6).....                                                                     | 17 |
| Appendix 6: Cross-sectional studies reporting on falls and social isolation/loneliness (n=11) ...                                | 20 |
| Appendix 7: Cross-sectional studies reporting on fear of falling and activity restriction due to<br>fear of falling (n= 15)..... | 24 |
| Appendix 8: Relevant findings from qualitative studies (n=7).....                                                                | 30 |

## Appendix 1: Literature search strategies

### **Ovid MEDLINE(R) ALL <1946 to Jan 11, 2021>**

1 Accidental Falls/  
 2 (slip\* or trip\* or stumbl\* or tumbl\*).tw,kf.  
 3 (fall\* or fell or "fall- related" or "near- fall").tw,kf.  
 4 or/1-3  
 5 limit 4 to "all aged (65 and over)"  
 6 exp Aged/ or geriatrics/  
 7 (geriatric\* or elder\* or age\* or "of age" or aging or senior\* or older  
 8 adult\* or retired or retiree\* or elder\* or pensioner\* or older people or older  
 9 patient\* or gerontology or Sexagenarian\* or septuagenarian\* or  
 10 octogenarian or nonagenarian\* or centenarian\* or sixties or seventies or  
 11 eighties or nineties).tw,kf.  
 12 4 and (6 or 7)  
 13 5 or 8  
 14 Social Isolation/  
 15 loneliness/  
 16 exp social support/  
 17 (social barrier\* or social isolat\* or social support\* or social car\* or  
 18 psychosocial support\* or psycho-social support\* or social frailt\* or  
 19 friendship\* or "social\* connected\*" or connectedness or lonely or loneliness  
 20 or "feel\* alone\*" or companionship).tw,kf.  
 21 ((lack or absence or minimi\*) adj2 (contact or communication or  
 22 support\*)),tw,kf.  
 23 or/10-14  
 24 9 and 15  
 25 animals/ not humans/  
 26 16 not 17

### **PsycINFO <1806 to January Week 2 2021>**

1 falls/  
 2 (slip\* or trip\* or stumbl\* or tumbl\*).tw.  
 3 (fall\* or fell or "fall- related" or "near- fall").tw.  
 4 or/1-3  
 5 limit 4 to "380 aged <age 65 yrs and older>"  
 6 (geriatric\* or elder\* or age\* or "of age" or aging or senior\* or older  
 7 adult\* or retired or retiree\* or elder\* or pensioner\* or older people or older  
 8 patient\* or gerontology or Sexagenarian\* or septuagenarian\* or

9 octogenarian or nonagenarian\* or centenarian\* or sixties or seventies or  
 10 eighties or nineties).tw.  
 11 4 and 6  
 12 5 or 7  
 13 social isolation/ or loneliness/ or social support/ or friendship/  
 14 (social barrier\* or social isolat\* or social support\* or social car\* or  
 15 psychosocial support\* or psycho-social support\* or social frailt\* or  
 16 friendship\* or "social\* connected\*" or connectedness or lonely or loneliness  
 17 or "feel\* alone\*" or companionship).tw.  
 18 ((lack or absence or minimi\*) adj2 (contact or communication or  
 19 support\*)),tw.  
 20 or/9-11  
 21 8 and 12  
 22 Limit 13 to human

### **Embase Classic+Embase <1947 to 2021 January 11>**

1 falling/  
 2 (slip\* or trip\* or stumbl\* or tumbl\*).tw.  
 3 (fall\* or fell or "fall- related" or "near- fall").tw.  
 4 or/1-3  
 5 limit 4 to aged <65+ years>  
 6 loneliness/ or social support/ or friendship/  
 7 exp social isolation/  
 8 (social barrier\* or social isolat\* or social support\* or social car\* or  
 9 psychosocial support\* or psycho-social support\* or social frailt\* or  
 10 friendship\* or "social\* connected\*" or connectedness or lonely or loneliness  
 11 or "feel\* alone\*" or companionship).tw.  
 12 ((lack or absence or minimi\*) adj2 (contact or communication or  
 13 support\*)),tw.  
 14 or/6-9  
 15 5 and 10  
 16 limit 11 to human

### **Database: EBM Reviews - Cochrane Database of Systematic Reviews <2005 to January 11, 2021>, EBM Reviews - ACP Journal Club <1991 to January 11, 2021>, EBM Reviews - Cochrane Clinical Answers <January 2021>, EBM Reviews - Database of Abstracts of Reviews of Effects <1st Quarter 2016>**

1 (slip\* or trip\* or stumbl\* or tumbl\*).mp.  
 2 (fall\* or fell or "fall- related" or "near- fall").mp.

3 1 or 2  
 4 (geriatric\* or elder\* or age\* or "of age" or aging or senior\* or older  
 5 adult\* or retired or retiree\* or elder\* or pensioner\* or older people or older  
 6 patient\* or gerontology or Sexagenarian\* or septuagenarian\* or  
 7 octogenarian or nonagenarian\* or centenarian\* or sixties or seventies or  
 8 eighties or nineties).mp.  
 9 3 and 4  
 6 (social barrier\* or social isolation\* or social support\* or social care\* or  
 10 psychosocial support\* or psycho-social support\* or social frailty\* or  
 11 friendship\* or "social\* connected\*" or connectedness or lonely or loneliness  
 12 or "feel\* alone\*" or companionship).mp.  
 13 7 ((lack or absence or minimi\*) adj2 (contact or communication or  
 14 support\*)).mp.  
 15 8 6 or 7  
 16 9 5 and 8

#### Joanna Briggs Institute EBP Database - <Current to January 11, 2021>

1 (slip\* or trip\* or stumbl\* or tumbl\*).mp.  
 2 (fall\* or fell or "fall- related" or "near- fall").mp.  
 3 1 or 2  
 4 (geriatric\* or elder\* or age\* or "of age" or aging or senior\* or older  
 5 adult\* or retired or retiree\* or elder\* or pensioner\* or older people or older  
 6 patient\* or gerontology or Sexagenarian\* or septuagenarian\* or  
 7 octogenarian or nonagenarian\* or centenarian\* or sixties or seventies or  
 8 eighties or nineties).mp.  
 9 3 and 4  
 6 (social barrier\* or social isolation\* or social support\* or social care\* or  
 7 psychosocial support\* or psycho-social support\* or social frailty\* or  
 8 friendship\* or "social\* connected\*" or connectedness or lonely or loneliness  
 9 or "feel\* alone\*" or companionship).mp.  
 10 7 ((lack or absence or minimi\*) adj2 (contact or communication or  
 11 support\*)).mp.  
 12 8 6 or 7  
 13 9 5 and 8

#### AMED (Allied and Complementary Medicine) <1985 to January 2021>

1 (slip\* or trip\* or stumbl\* or tumbl\*).mp.  
 2 (fall\* or fell or "fall- related" or "near- fall").mp.  
 3 1 or 2

4 (geriatric\* or elder\* or age\* or "of age" or aging or senior\* or older  
 5 adult\* or retired or retiree\* or elder\* or pensioner\* or older people or older  
 6 patient\* or gerontology or Sexagenarian\* or septuagenarian\* or  
 7 octogenarian or nonagenarian\* or centenarian\* or sixties or seventies or  
 8 eighties or nineties).mp.  
 9 3 and 4  
 6 (social barrier\* or social isolation\* or social support\* or social care\* or  
 7 psychosocial support\* or psycho-social support\* or social frailty\* or  
 8 friendship\* or "social\* connected\*" or connectedness or lonely or loneliness  
 9 or "feel\* alone\*" or companionship).mp.  
 10 7 ((lack or absence or minimi\*) adj2 (contact or communication or  
 11 support\*)).mp.  
 12 8 6 or 7  
 13 9 5 and 8



## Appendix 2: Study Characteristics (n=39)

| Author, year        | Study title                                                                                                                               | Journal name                                                                   | Country     | Study design    | Study duration (months) |
|---------------------|-------------------------------------------------------------------------------------------------------------------------------------------|--------------------------------------------------------------------------------|-------------|-----------------|-------------------------|
| Apikomkon, 2003[26] | Fear of falling and fall circumstances in Thailand                                                                                        | NA                                                                             | Thailand    | cross-sectional | NA                      |
| Chiu, 2011[37]      | Psychosocial responses to falling in older Chinese immigrants living in the community                                                     | Dissertation Abstracts International Section A: Humanities and Social Sciences | Canada      | qualitative     | 6                       |
| Choi, 2015[30]      | Characteristics associated with fear of falling and activity restriction in South Korean older adults                                     | Journal of Aging and Health                                                    | South Korea | cross-sectional | NA                      |
| Curcio, 2009[4]     | Activity restriction related to fear of falling among older people in the Colombian Andes Mountain                                        | Journal of Aging and Health                                                    | Columbia    | cross-sectional | NA                      |
| Dias, 2011[5]       | Characteristics associated with activity restriction induced by fear of falling in community-dwelling elderly                             | Revista Brasileira de Fisioterapia                                             | Brazil      | cross-sectional | NA                      |
| Faes, 2010[36]      | Qualitative study on the impact of falling in frail older persons and family caregivers: Foundations for an intervention to prevent falls | Aging & Mental Health                                                          | Netherlands | qualitative     | NA                      |
| Faria, 2020[22]     | Elderly residents in the community: gaining knowledge to support a rehabilitation nursing program                                         | Revista Brasileira de Enfermagem                                               | Portugal    | cross-sectional | NA                      |
| Ferreira, 2018[31]  | Aspects of social participation and neighborhood perception: ELSI-Brazil                                                                  | Revista de saude Publica                                                       | Brazil      | cross sectional | NA                      |
| Finn, 2001[14]      | The relationship between falls and fall-related efficacy, depression, and social resources                                                | Dissertation Abstracts International: Section B: The Sciences and Engineering  | USA         | cross-sectional | NA                      |
| Gagnon, 2005[3]     | Affective correlates of fear of falling in elderly persons                                                                                | American Journal of Geriatric Psychiatry                                       | Canada      | cross-sectional | NA                      |
| Hajek, 2017[20]     | The association of falls with loneliness and social exclusion: evidence from the DEAS German Ageing Survey                                | BMC Geriatrics                                                                 | Germany     | cross-sectional | NA                      |

|                           |                                                                                                                                                                                       |                                                 |                                                                  |                 |    |
|---------------------------|---------------------------------------------------------------------------------------------------------------------------------------------------------------------------------------|-------------------------------------------------|------------------------------------------------------------------|-----------------|----|
| Hajek, 2020[13]           | What are the psychosocial consequences when fear of falling starts or ends? Evidence from an asymmetric fixed effects analysis based on longitudinal data from the general population | International Journal of Geriatric Psychiatry   | Germany                                                          | cohort          | 36 |
| Host, 2011[38]            | Older people's perception of and coping with falling, and their motivation for fall-prevention programmes                                                                             | Scandinavian Journal of Public Health           | Denmark                                                          | qualitative     | 2  |
| Howland, 1998[25]         | Covariates of fear of falling and associated activity curtailment                                                                                                                     | The Gerontological Society of America           | USA                                                              | cross-sectional | NA |
| Iliffe, 2007[16]          | Health risk appraisal in older people 2: the implications for clinicians and commissioners of social isolation risk in older people                                                   | British Journal of General Practice             | England                                                          | cross-sectional | NA |
| Kara, 2009[28]            | Evaluation of home environment and life satisfaction and falling in geriatrics: Examination of its relationship with fear                                                             | Physiotherapy Rehabilitation                    | Turkey                                                           | cross-sectional | NA |
| Mendes da Costa, 2012[29] | Fear of falling and associated activity restriction in older people. results of a cross-sectional study conducted in a Belgian town                                                   | Archives of Public Health                       | Belgium                                                          | cross-sectional | NA |
| Merchant, 2020[7]         | Relationship between fear of falling, fear-related activity restriction, frailty, and sarcopenia                                                                                      | Journal of the American Geriatrics Society      | Singapore                                                        | cross-sectional | NA |
| Meric, 2007[34]           | A qualitative study on the perceptions of old individuals regarding the life of the fall and its effect on their daily lives                                                          | Turkish Journal of Geriatrics                   | Turkey                                                           | qualitative     | 2  |
| Murphy, 2002[1]           | Characteristics associated with fear of falling and activity restriction in community-living older Persons                                                                            | Journal of the American Geriatrics Society      | USA                                                              | cross-sectional | NA |
| Nakaya, 2013[6]           | The association between self-reported history of physical diseases and psychological distress in a community-dwelling Japanese population: the Ohsaki Cohort 2006 Study               | European Journal of Public Health               | Japan                                                            | cross-sectional | NA |
| Nicholson, 2005[15]       | The relationship between injurious falls, fear of falling, social isolation, and depression                                                                                           | NA                                              | USA                                                              | cross-sectional | NA |
| Petrinec, 2020[32]        | Health-related quality of life of older women religious: negative influence of frailty                                                                                                | Western Journal of Nursing Research             | USA                                                              | cross-sectional | NA |
| Pin, 2016[11]             | Impact of falling on social participation and social support trajectories in a middle-aged and elderly European sample                                                                | Social Science and Medicine - Population Health | Denmark, Sweden, Netherlands, Austria, Germany, France, Belgium, | cohort          | 72 |

|                           |                                                                                                                                                  |                                                                               |                           |                 |    |
|---------------------------|--------------------------------------------------------------------------------------------------------------------------------------------------|-------------------------------------------------------------------------------|---------------------------|-----------------|----|
|                           |                                                                                                                                                  |                                                                               | Switzerland, Italy, Spain |                 |    |
| Quach, 2016[19]           | Social determinants of falls: The role of social support and depression among community-dwelling older adults                                    | Dissertation Abstracts International: Section B: The Sciences and Engineering | USA                       | cohort          | 36 |
| Robins, 2018[21]          | The association between physical activity and social isolation in community-dwelling older adults                                                | Aging & Mental Health                                                         | Australia                 | cross-sectional | NA |
| Schmid, 2009[35]          | Consequences of poststroke falls: activity limitation, increased dependence, and the development of fear of falling                              | American Journal of Occupational Therapy                                      | USA                       | qualitative     | 6  |
| Schnittger, 2012[18]      | Risk factors and mediating pathways of loneliness and social support in community-dwelling older adults                                          | Aging & Mental Health                                                         | Ireland                   | cross-sectional | NA |
| Stel, 2004[2]             | Consequences of falling in older men and women and risk factors for health service use and functional decline                                    | Age and Ageing                                                                | Netherlands               | cross-sectional | NA |
| Tinetti, 1998[9]          | The effect of falls and fall injuries on functioning in community-dwelling older persons                                                         | Journal of Gerontology                                                        | USA                       | cohort          | 36 |
| Tinetti, 1994[24]         | Fear of falling and fall-related efficacy in relationship to functioning among community-living elders                                           | Journal of Gerontology                                                        | USA                       | cross-sectional | NA |
| van der Meulen, 2014[10]  | Effect of fall-related concerns on physical, mental, and social function in community-dwelling older adults: A prospective cohort study          | Journal of American Geriatrics Society                                        | Netherlands               | cohort          | 14 |
| van Lankveld, 2011[17]    | Age-related health hazards in old patients with first-time referral to a rheumatologist: A descriptive study                                     | Arthritis                                                                     | Netherlands               | cross sectional | NA |
| Vanden Wyngaert, 2020[23] | Associations between the measures of physical function, risk of falls and the quality of life in haemodialysis patients: a cross-sectional study | BMC Nephrology                                                                | Belgium                   |                 |    |
| Vellas, 1987[8]           | Prospective study of restriction of activity in old people after falls                                                                           | Age and Ageing                                                                | France                    | cohort          | 6  |
| Ward-Griffin, 2004[33]    | Falls and fear of falling among community dwelling seniors: the dynamic tension between exercising precaution and striving for independence      | Canadian Journal on Aging                                                     | Canada                    | qualitative     | NA |

|                    |                                                                                                                                               |                                                       |             |                 |    |
|--------------------|-----------------------------------------------------------------------------------------------------------------------------------------------|-------------------------------------------------------|-------------|-----------------|----|
| Xu, 2019[39]       | Developing a falls prevention program for community-dwelling stroke survivors in Singapore: client and caregiver perspectives                 | Disability and Rehabilitation                         | Singapore   | qualitative     | NA |
| Yu, 2020[12]       | Longitudinal Assessment of the relationships between geriatric conditions and loneliness                                                      | Journal of the American Medical Directors Association | USA         | cohort          | 96 |
| Zijlstra, 2007[27] | Prevalence and correlates of fear of falling, and associated avoidance of activity in the general population of community-living older people | Age and Ageing                                        | Netherlands | cross-sectional | NA |

## Appendix 3: Patient Characteristics (n=39)

| DEMOGRAPHIC DATA          |                     |                     |                    |                              |                             |          |        |
|---------------------------|---------------------|---------------------|--------------------|------------------------------|-----------------------------|----------|--------|
| Author, year              | Overall sample size | Overall age (years) | Overall age (type) | Overall age variance (value) | Overall age variance (type) | % female | % male |
| Apikomokon, 2003[26]      | 546                 | NR                  | NR                 | 60-94                        | range                       | 61       | 39     |
| Chiu, 2011[37]            | 18                  | 81                  | mean               | 71 to 94                     | range                       | 88.9     | 11.1   |
| Choi, 2015[30]            | 4,247               | NR                  | NR                 | NR                           | NR                          | NR       | NR     |
| Curcio, 2009[4]           | 1668                | 70.9                | mean               | 7.4                          | SD                          | 54.5     | 45.5   |
| Dias, 2011[5]             | 113                 | 74.5                | mean               | 7                            | SD                          | 85       | 15     |
| Faes, 2010[36]            | 10                  | 70-90               | range              | NR                           | NR                          | 60       | 40     |
| Faria, 2020[22]           | 48                  | 75                  | mean               | 6.8                          | SD                          | 66.67    | 33.33  |
| Ferreira, 2018[31]        | 7935                | NR                  | NR                 | NR                           | NR                          | 56.9     | 43.1   |
| Finn, 2001[14]            | 49                  | NR                  | mean               | NR                           | SD                          | NR       | NR     |
| Gagnon, 2005[3]           | 105                 | 78.2                | mean               | 8.9                          | SD                          | 86.7     | 13.3   |
| Hajek, 2017[20]           | 7808                | 73.8                | mean               | 5.9                          | SD                          | 46.2     | 53.8   |
| Hajek, 2020[13]           | 8836                | 65.5                | mean               | 10.7                         | SD                          | 50.4     | 49.6   |
| Host, 2011[38]            | 14                  | 77                  | mean               | 68-87                        | range                       | 64.3     | 35.7   |
| Howland, 1998[25]         | 266                 | 76.3                | mean               | 7.9                          | SD                          | 77       | 23     |
| Iliffe, 2007[16]          | 3139                | NR                  | NR                 | 65-75+                       | range                       | 54.5     | 45.5   |
| Kara, 2009[28]            | 47                  | 71.7                | mean               | 5.6                          | SD                          | 55.3     | 44.7   |
| Mendes da Costa, 2012[29] | 501                 | NR                  | NR                 | 65-85+                       | NR                          | 57.7     | 42.3   |
| Merchant, 2020[7]         | 493                 | 73                  | mean               | 8                            | SD                          | 79.3     | 20.7   |
| Meric, 2007[34]           | 22                  | NR                  | NR                 | 65-83+                       | range                       | 63.6     | 36.4   |
| Murphy, 2002[1]           | 1064                | 79.6                | mean               | 5.3                          | SD                          | 73       | 27     |
| Nakaya, 2013[6]           | 43487               | 65+                 | range              | NR                           | NR                          | 53.9     | 46.1   |
| Nicholson, 2005[15]       | 68                  | 78.5                | mean               | 6.3                          | SD                          | 60.4     | 39.6   |
| Petrinec, 2020[32]        | 108                 | 75.6                | mean               | 65-93                        | range                       | 100      | 0      |
| Pin, 2016[11]             | 16583               | 50-95               | range              | NR                           | NR                          | NR       | NR     |
| Quach, 2016[19]           | 8464                | 74                  | mean               | 7                            | SD                          | 58.7     | 41.3   |
| Robins, 2018[21]          | 245                 | 77                  | mean               | 6                            | SD                          | 60       | 40     |
| Schmid, 2009[35]          | 42                  | 67.5                | mean               | 11.93                        | SD                          | NR       | NR     |
| Schnittger, 2012[18]      | 579                 | NR                  | NR                 | NR                           | NR                          | 69.1     | 30.9   |
| Stel, 2004[2]             | 204                 | 78.7                | mean               | 6.3                          | SD                          | 54.9     | 45.1   |
| Tinetti, 1998[9]          | 1103                | NR                  | NR                 | NR                           | NR                          | NR       | NR     |
| Tinetti, 1994[24]         | 1103                | 79.6                | mean               | 5.2                          | SD                          | 73       | 27     |

|                           |      |        |       |       |       |      |      |
|---------------------------|------|--------|-------|-------|-------|------|------|
| van der Meulen, 2014[10]  | 260  | 77.9   | mean  | 5     | SD    | 72.7 | 27.3 |
| van Lankveld, 2011[17]    | 154  | 79.2   | mean  | 5.1   | SD    | 79   | 21   |
| Vanden Wyngaert, 2020[23] | 113  | 67.5   | mean  | 16    | SD    | 42.5 | 57.5 |
| Vellas, 1987[8]           | 178  | 65-85+ | range | NR    | NR    | 76.4 | 23.6 |
| Ward-Griffin, 2004[33]    | 9    | 81.7   | mean  | 72-92 | range | 77.7 | 22.3 |
| Xu, 2019[39]              | 17   | 65     | mean  | 7     | SD    | 44.4 | 55.6 |
| Yu, 2020[12]              | 4680 | 74.01  | mean  | 9.69  | SD    | 56.1 | 43.9 |
| Zijlstra, 2007[27]        | 4376 | 77.1   | mean  | 4.9   | SD    | 59.9 | 40.1 |

| SETTING DATA        |                                                               |                                 |                               |                                                                                                                                                                                                                         |
|---------------------|---------------------------------------------------------------|---------------------------------|-------------------------------|-------------------------------------------------------------------------------------------------------------------------------------------------------------------------------------------------------------------------|
| Author, year        | Setting                                                       | Streamlined setting description | Participants living alone (%) | Description of access to caregivers                                                                                                                                                                                     |
| Apikomkon, 2003[26] | Community in 4 provinces of Thailand                          | Community                       | 9.9                           | NR                                                                                                                                                                                                                      |
| Chiu, 2011[37]      | Community in the Greater Toronto Area, Canada                 | Community                       | 61                            | Two respondents lived with their children. The rest lived alone or only with their spouse. Only seven of 18 respondents had at least one grown child living in the same city, who might provide assistance when needed. |
| Choi, 2015[30]      | Community setting in Korea                                    | Community                       | NR                            | NR                                                                                                                                                                                                                      |
| Curcio, 2009[4]     | Community in Columbian Andes Mountains                        | Community                       | 9.5                           | NR                                                                                                                                                                                                                      |
| Dias, 2011[5]       | Community setting in Brazil                                   | Community                       | 38                            | NR                                                                                                                                                                                                                      |
| Faes, 2010[36]      | Home and outpatient clinic in Netherlands                     | Community + Medical             | 10                            | All participants had access to a caregiver (either child or spouse)                                                                                                                                                     |
| Faria, 2020[22]     | Urban health unit in northern Portugal                        | Medical                         | NR                            | NR                                                                                                                                                                                                                      |
| Ferreira, 2018[31]  | Urban communities in Brazil                                   | Community                       | NR                            | NR                                                                                                                                                                                                                      |
| Finn, 2001[14]      | Two nursing homes in the Chicago Metropolitan Area, USA       | Nursing home                    | 0                             | In general, they have entered a nursing home because of an inability to adequately care for themselves, and they do not have anyone who can ably assist them, or they lack financial resources.                         |
| Gagnon, 2005[3]     | Medical or orthopedic wards of 3 hospitals in Toronto, Canada | Medical                         | 65.7                          | NR                                                                                                                                                                                                                      |
| Hajek, 2017[20]     | Communities in Germany                                        | Community                       | NR                            | NR                                                                                                                                                                                                                      |

|                           |                                                                                                                                           |           |      |                                                                                                         |
|---------------------------|-------------------------------------------------------------------------------------------------------------------------------------------|-----------|------|---------------------------------------------------------------------------------------------------------|
| Hajek, 2020[13]           | Community in Germany                                                                                                                      | Community | 28.9 | NR                                                                                                      |
| Host, 2011[38]            | Copenhagen area in Denmark                                                                                                                | Community | 64.3 | NR                                                                                                      |
| Howland, 1998[25]         | Communities in Eastern Massachusetts                                                                                                      | Community | 87   | NR                                                                                                      |
| Iliife, 2007[16]          | Community in London, England                                                                                                              | Community | 32.8 | NR                                                                                                      |
| Kara, 2009[28]            | Districts of Narlıdere, Gülbahçe and Mordoğan in Izmir, Turkey                                                                            | Community | 27.7 | NR                                                                                                      |
| Mendes da Costa, 2012[29] | Community in Walloon region of Belgium                                                                                                    | Community | 36.4 | NR                                                                                                      |
| Merchant, 2020[7]         | Community in northwest region of Singapore                                                                                                | Community | NR   | NR                                                                                                      |
| Meric, 2007[34]           | Geriatric Outpatient of Gülhane Military Medical Academy in Turkey                                                                        | Medical   | 13.6 | NR                                                                                                      |
| Murphy, 2002[1]           | Community setting in New Haven, Connecticut, USA                                                                                          | Community | 70   | NR                                                                                                      |
| Nakaya, 2013[6]           | Community in Japan                                                                                                                        | Community | NR   | 87.3% reported sufficient social support, 12.2% reported lack of social support, 4.2% unknown.          |
| Nicholson, 2005[15]       | Community in United States                                                                                                                | Community | 53.4 | NR                                                                                                      |
| Petrinec, 2020[32]        | Cleveland Catholic Diocese in USA                                                                                                         | Community | 100  | Participants were not included if they needed caregiver assistance.                                     |
| Pin, 2016[11]             | Communities in 10 European Countries (Denmark, Sweden, The Netherlands, Austria, Germany, France, Belgium, Switzerland, Italy, and Spain) | Community | NR   | NR                                                                                                      |
| Quach, 2016[19]           | Communities in USA                                                                                                                        | Community | 23.3 | One-third did not have the perceived support with basic personal care (eating or dressing) when needed. |
| Robins, 2018[21]          | Communities in Australia                                                                                                                  | Community | 49   | NR                                                                                                      |
| Schmid, 2009[35]          | Community in United States                                                                                                                | Community | NR   | All participants had a caregiver.                                                                       |
| Schnittger, 2012[18]      | Technology Research for Independent Living (TRIL) clinic at St James's Hospital, Dublin.                                                  | Medical   | NR   | NR                                                                                                      |
| Stel, 2004[2]             | Community in three regions in the Netherlands                                                                                             | Community | NR   | NR                                                                                                      |

|                           |                                                                                                     |           |      |                                                                                                                          |
|---------------------------|-----------------------------------------------------------------------------------------------------|-----------|------|--------------------------------------------------------------------------------------------------------------------------|
| Tinetti, 1998[9]          | Community in New Haven, Connecticut, USA                                                            | Community | NR   | NR                                                                                                                       |
| Tinetti, 1994[24]         | Community in New Haven, Connecticut, USA                                                            | Community | 69   | NR                                                                                                                       |
| van der Meulen, 2014[10]  | Community in the Netherlands                                                                        | Community | 53.1 | NA                                                                                                                       |
| van Lankveld, 2011[17]    | Community in the Netherlands                                                                        | Community | NR   | NR                                                                                                                       |
| Vanden Wyngaert, 2020[23] | Dialysis centres in Belgium                                                                         | Medical   | NR   | NR                                                                                                                       |
| Vellas, 1987[8]           | Community in Toulouse, France                                                                       | Community | NR   | NR                                                                                                                       |
| Ward-Griffin, 2004[33]    | Community in Canada (11 senior apartment towers and in the Health Information and Promotion Centre) | Community | 77.7 | NR                                                                                                                       |
| Xu, 2019[39]              | Community rehabilitation centers in Singapore                                                       | Medical   | 0    | Four family caregivers (two male) and four maids (all female) were interviewed. 33% employed a maid as a main caregiver. |
| Yu, 2020[12]              | Community in USA                                                                                    | Community | NR   | NR                                                                                                                       |
| Zijlstra, 2007[27]        | Community in two urban areas in the Netherlands                                                     | Community | 44   | NR                                                                                                                       |

| FALLS AND FRAILITY DATA |                                          |                                                                                                                                   |                               |               |                       |                            |                        |                       |
|-------------------------|------------------------------------------|-----------------------------------------------------------------------------------------------------------------------------------|-------------------------------|---------------|-----------------------|----------------------------|------------------------|-----------------------|
| Author, year            | Participants with history of falling (%) | List of comorbidities [comorbidity 1 (%), etc.]                                                                                   | Participants with frailty (%) | Frailty scale | Overall frailty score | Overall frailty score type | Frailty variance value | Frailty variance type |
| Apikomokon, 2003[26]    | 21                                       | NR                                                                                                                                | NR                            | NR            | NR                    | NR                         | NR                     | NR                    |
| Chiu, 2011[37]          | 100                                      | All participants reported having chronic conditions. The most common physical conditions reported were diabetes and hypertension. | NR                            | NR            | NR                    | NR                         | NR                     | NR                    |
| Choi, 2015[30]          | NR                                       | NR                                                                                                                                | NR                            | NR            | NR                    | NR                         | NR                     | NR                    |
| Curcio, 2009[4]         | 31.9                                     | Hypertension (53.0), Osteoarthritis (39.2), heart disease (20.2), COPD                                                            | NR                            | NR            | NR                    | NR                         | NR                     | NR                    |



|                           |            |                                                                                                                                                                                          |      |             |    |    |    |    |    |
|---------------------------|------------|------------------------------------------------------------------------------------------------------------------------------------------------------------------------------------------|------|-------------|----|----|----|----|----|
|                           |            | (16.8), Diabetes Mellitus (13.4), Lower extremities fracture (11.7), Pain in joints (33.1), Dizziness (15.2), Breathlessness (11.4), Hearing impairment (33.0), visual impairment (68.9) |      |             |    |    |    |    |    |
| Dias, 2011[5]             | NR         | NR                                                                                                                                                                                       | NR   | NR          | NR | NR | NR | NR | NR |
| Faes, 2010[36]            | 100        | Cognitive impairment (70%)                                                                                                                                                               | NR   | NR          | NR | NR | NR | NR | NR |
| Faria, 2020[22]           | 25         | Cardiovascular diseases (76.6), endocrine diseases (56.8), musculoskeletal diseases (45.7), depression (16.3), respiratory diseases (14.3) and cerebrovascular diseases (9.3).           | NR   | NR          | NR | NR | NR | NR | NR |
| Ferreira, 2018[31]        | NR         | Overweight (women=65.2%, men=59.0%)                                                                                                                                                      | NR   | NR          | NR | NR | NR | NR | NR |
| Finn, 2001[14]            | 51         | NR                                                                                                                                                                                       | NR   | NR          | NR | NR | NR | NR | NR |
| Gagnon, 2005[3]           | 100        | NR                                                                                                                                                                                       | NR   | NR          | NR | NR | NR | NR | NR |
| Hajek, 2017[20]           | 17.6       | NR                                                                                                                                                                                       | NR   | NR          | NR | NR | NR | NR | NR |
| Hajek, 2020[13]           | NR         | Number of physical illnesses is mean = 2.6, SD = 1.9                                                                                                                                     | NR   | NR          | NR | NR | NR | NR | NR |
| Host, 2011[38]            | 100        | NR                                                                                                                                                                                       | NR   | NR          | NR | NR | NR | NR | NR |
| Howland, 1998[25]         | 35         | Vision problems (26), stroke (11), dizziness (29)                                                                                                                                        | NR   | NR          | NR | NR | NR | NR | NR |
| Iiliffe, 2007[16]         | 11.20      | Two or more chronic conditions (59.0%), takes 4 or more meds (33.4%)                                                                                                                     | NR   | NR          | NR | NR | NR | NR | NR |
| Kara, 2009[28]            | 29.9       | NR                                                                                                                                                                                       | NR   | NR          | NR | NR | NR | NR | NR |
| Mendes da Costa, 2012[29] | 31.6       | NR                                                                                                                                                                                       | NR   | NR          | NR | NR | NR | NR | NR |
| Merchant, 2020[7]         | mean = 0.4 | NR                                                                                                                                                                                       | 51.3 | FRAIL scale | NR | NR | NR | NR | NR |
| Meric, 2007[34]           | 81         | NR                                                                                                                                                                                       | NR   | NR          | NR | NR | NR | NR | NR |
| Murphy, 2002[1]           | 39.70      | Chronic dizziness (24.2), 5 or more medications (35.8), vision impairment (40.5)                                                                                                         | NR   | NR          | NR | NR | NR | NR | NR |
| Nakaya, 2013[6]           | 17.3       | NR                                                                                                                                                                                       | NR   | NR          | NR | NR | NR | NR | NR |
| Nicholson, 2005[15]       | 100        | NR                                                                                                                                                                                       | NR   | NR          | NR | NR | NR | NR | NR |

|                           |      |                                                                                                                                                                                                                                                                                                                                                                                                                                                                                                       |    |                                 |    |    |    |    |
|---------------------------|------|-------------------------------------------------------------------------------------------------------------------------------------------------------------------------------------------------------------------------------------------------------------------------------------------------------------------------------------------------------------------------------------------------------------------------------------------------------------------------------------------------------|----|---------------------------------|----|----|----|----|
| Petrinec, 2020[32]        | NR   | Hypertension (60), Cataracts (60), Thyroid disorders (30), Osteoporosis (17), Diabetes (7)                                                                                                                                                                                                                                                                                                                                                                                                            | 19 | Tilburg Frailty Indicator (TFI) | NR | NR | NR | NR |
| Pin, 2016[11]             | 2.8  | NR                                                                                                                                                                                                                                                                                                                                                                                                                                                                                                    | NR | NR                              | NR | NR | NR | NR |
| Quach, 2016[19]           | 38.0 | NR                                                                                                                                                                                                                                                                                                                                                                                                                                                                                                    | NR | NR                              | NR | NR | NR | NR |
| Robins, 2018[21]          | 38   | Congestive heart failure (4%); Heart disease (33%); stroke (9%); Cancer (25%); diabetes (18%); lung disease (16%); Parkinson's disease (1%)                                                                                                                                                                                                                                                                                                                                                           | NR | NR                              | NR | NR | NR | NR |
| Schmid, 2009[35]          | NR   | Stroke (100%)                                                                                                                                                                                                                                                                                                                                                                                                                                                                                         | NR | NR                              | NR | NR | NR | NR |
| Schnittger, 2012[18]      | NR   | NR                                                                                                                                                                                                                                                                                                                                                                                                                                                                                                    | NR | NR                              | NR | NR | NR | NR |
| Stel, 2004[2]             | 100  | Dizziness (27.9%), visual impairment (23%)                                                                                                                                                                                                                                                                                                                                                                                                                                                            | NR | NR                              | NR | NR | NR | NR |
| Tinetti, 1998[9]          | 30.3 | NR                                                                                                                                                                                                                                                                                                                                                                                                                                                                                                    | NR | NR                              | NR | NR | NR | NR |
| Tinetti, 1994[24]         | 39   | One or more chronic conditions (78%)                                                                                                                                                                                                                                                                                                                                                                                                                                                                  | NR | NR                              | NR | NR | NR | NR |
| van der Meulen, 2014[10]  | 55.5 | NA                                                                                                                                                                                                                                                                                                                                                                                                                                                                                                    | NR | NA                              | NA | NA | NA | NA |
| van Lankveld, 2011[17]    | 44   | Cardiac 36%, hypertension 40%, vascular 25%, respiratory 12%, EENT 21%, upper GI 14%, lower GI 10%, Hepatic 3%, kidney 3%, other GU 16%, neurological 18%, endocrine 21%, psychiatric 8%, Rheumatic disease general (56%), Osteoarthritis (49%), Spondylosis(31%), Rheumatoid arthritis(17%), Arthritis otherwise defined (12%), Gout (6%), Chodrocalcinosis (12%), Osteoporosis (1%), Shoulder problem (6%), Polymyalgia rheumatica (3%), Soft tissue (1%), Carpal tunnel syndrome (2%), Others (6%) | NR | NR                              | NR | NR | NR | NR |
| Vanden Wyngaert, 2020[23] | NR   | Cardiovascular disease (74.3%) diabetes (46.0%) musculoskeletal complications (44.2%), Neuropathy (28.3), retinopathy (31.9), respiratory complications (24.8), hepatopathy (17.7), pain (27.4%), depression                                                                                                                                                                                                                                                                                          | NR | NR                              | NR | NR | NR | NR |

1  
2  
3  
4  
5  
6  
7  
8  
9  
10  
11  
12  
13  
14  
15  
16  
17  
18  
19  
20  
21  
22  
23  
24  
25  
26  
27  
28  
29  
30  
31  
32  
33  
34  
35  
36  
37  
38  
39  
40  
41  
42  
43  
44  
45  
46  
47

|                        |            |                                                                       |    |    |    |    |    |    |
|------------------------|------------|-----------------------------------------------------------------------|----|----|----|----|----|----|
|                        |            | (23.9%), fatigue (18.6%), anxiety (15.0%), sleep disturbances (12.4%) |    |    |    |    |    |    |
| Vellas, 1987[8]        | 50         | NR                                                                    | NR | NR | NR | NR | NR | NR |
| Ward-Griffin, 2004[33] | NR         | NR                                                                    | NR | NR | NR | NR | NR | NR |
| Xu, 2019[39]           | 100        | Stroke (100%)                                                         | NR | NR | NR | NR | NR | NR |
| Yu, 2020[12]           | mean =0.74 | The mean number of comorbidities at baseline was 2.24 (SD=1.38)       | NR | NR | NR | NR | NR | NR |
| Zijlstra, 2007[27]     | 32.6       | NR                                                                    | NR | NR | NR | NR | NR | NR |

For peer review only

## Appendix 4: Mental health outcomes related to falls, fear of falling, and social isolation (n=6)

| Author, Year    | Sample | Results                                                                                                                                                                                                                                                                                                                                                                             | Text description/ interpretation of findings                                                                                                                                                                                                                                                                                                                                                                                                                                                                                                                                                                                                                                                                                                                          |
|-----------------|--------|-------------------------------------------------------------------------------------------------------------------------------------------------------------------------------------------------------------------------------------------------------------------------------------------------------------------------------------------------------------------------------------|-----------------------------------------------------------------------------------------------------------------------------------------------------------------------------------------------------------------------------------------------------------------------------------------------------------------------------------------------------------------------------------------------------------------------------------------------------------------------------------------------------------------------------------------------------------------------------------------------------------------------------------------------------------------------------------------------------------------------------------------------------------------------|
| Murphy, 2002[1] | n=1064 | <p><b>Variables independently associated with activity restriction in participants with fear of falling</b></p> <p><i>Depression (CES-D scale)</i><br/>Adj relative risk: 1.27 (95% CI, 1.00-1.60); p=0.048</p>                                                                                                                                                                     | “We found that a history of an injurious fall within the past year, slow timed physical performance, two or more chronic conditions, and depressive symptoms were all independently associated with activity restriction.”                                                                                                                                                                                                                                                                                                                                                                                                                                                                                                                                            |
| Stel, 2004[2]   | n=204  | <p><b>Relationship between higher depression score and decline in social activities because of a fall</b></p> <p>OR: 2.0 (95% CI: 1.2-3.3); p&lt;0.05</p>                                                                                                                                                                                                                           | “A decline in functional status, social activities and physical activities was reported more often in respondents with a higher depression score.”                                                                                                                                                                                                                                                                                                                                                                                                                                                                                                                                                                                                                    |
| Gagnon, 2005[3] | n=105  | <p><b>Variables associated with fear of falling</b><br/>(Comparing subjects with no/slight fear and subjects with moderate/severe fear)</p> <p><b>Depression</b><br/>(Structured Clinical Interview for DSM-IV (SCID))</p> <p>Wald chi-square= 8.76; p=0.03</p> <p><b>Anxiety</b><br/>(Structured Clinical Interview for DSM-IV (SCID))</p> <p>Wald chi-square= 5.95; p&lt;0.02</p> | <p>“Not only were depressive disorders and depression severity independently associated with fear of falling, but depression had the strongest association with this fear among all the variables that we measured.</p> <p>Given that this was a cross-sectional study, a causal relationship between depression and fear of falling cannot be inferred. [...] It is possible, therefore, that in some individuals, fear of falling is an anxious manifestation of depression. However, depression could also be a consequence of activity restriction or social isolation resulting from a fear of falling”</p> <p>“Depressive disorders and anxiety disorders were significantly associated with categorical fear of falling, independently of these variables”</p> |
| Curcio, 2009[4] | n=1668 | <p><b>Variables associated with activity restriction related to fear of falling</b></p> <p><b>Depression</b><br/>OR: 1.76 (95% CI, 1.38-2.24)</p>                                                                                                                                                                                                                                   | “A second model was then constructed with the psychosocial associated factors and other clinical and functional covariates (see Table 4). After adjustment, functional and clinical factors remained independently associated with activity restriction related to fear of falling. Only depression and poor perceived health variables emerged as independent factors.”                                                                                                                                                                                                                                                                                                                                                                                              |
| Dias, 2011[5]   | n=113  | <p><b>Variables associated with activity restriction due to fear of falling</b><br/>(compared to no FOF or FOF alone)</p>                                                                                                                                                                                                                                                           | “The variables that best discriminated the groups were depression, exhaustion and participation in social activities, demonstrated in the diagram (Figure 1). For the grouping obtained through the Chi-square                                                                                                                                                                                                                                                                                                                                                                                                                                                                                                                                                        |

1  
2  
3  
4  
5  
6  
7  
8  
9  
10  
11  
12  
13  
14  
15  
16  
17  
18  
19  
20  
21  
22  
23  
24  
25  
26  
27  
28  
29  
30  
31  
32  
33  
34  
35  
36  
37  
38  
39  
40  
41  
42  
43  
44  
45  
46  
47

|                   |         |                                                                                                                                                                                                                                                                                               |                                                                                                                                                                                                                                                                                                                                                                                                                                                                                                                                                                                                                                                                                                                                                                                                                                                                                                                  |
|-------------------|---------|-----------------------------------------------------------------------------------------------------------------------------------------------------------------------------------------------------------------------------------------------------------------------------------------------|------------------------------------------------------------------------------------------------------------------------------------------------------------------------------------------------------------------------------------------------------------------------------------------------------------------------------------------------------------------------------------------------------------------------------------------------------------------------------------------------------------------------------------------------------------------------------------------------------------------------------------------------------------------------------------------------------------------------------------------------------------------------------------------------------------------------------------------------------------------------------------------------------------------|
|                   |         | <p><b>Depression</b><br/>Chi-square=15.2, p=0.004</p>                                                                                                                                                                                                                                         | <p>Automatic Interaction Detection (CHAID) method, it may be observed that the first distinctive characteristic was depression, evaluated using GDS. Those with positive symptoms for depression showed 90% chance of restricting activities due to fear of falling.</p> <p>Additionally, the presence of depressive symptoms seems to modulate the factors that are associated with activity restriction due to fear of falling. A greater risk for depression has been associated with inadequate evaluation of coping self-efficacy in stressful events of life. It is worth noting that the participants of the present study who restricted activities by FOF showed lower self-efficacy in relation to the other participants. Thus, it is possible that elders with depressive symptoms perceive themselves less capable of performing certain tasks and, because of that, restrict their activities.</p> |
| Nakaya, 2013[6]   | n=43487 | <p><b>Relationship between history of falling and psychological distress</b></p> <p><u>Sufficient social support</u><br/>OR, 1.6 (95% CI: 1.3-1.9)<br/>p&lt;0.01</p> <p><u>Lack of social support</u><br/>OR, 2.0 (95% CI: 1.4-2.8)<br/>p&lt;0.01</p>                                         | <p>“We also conducted stratified analyses regarding OR of psychological distress according to differences in social support status. Almost all subjects with a history of physical disease (including those with history of fall/fracture) were at increased risk of psychological distress, regardless of social support.”</p>                                                                                                                                                                                                                                                                                                                                                                                                                                                                                                                                                                                  |
| Merchant, 2020[7] | n=493   | <p><b>Variables associated with fear of falling alone</b></p> <p><b>Depression</b><br/>OR, 4.90 ( 95% CI, 1.06–22.67)<br/>p&lt;0.05</p> <p><b>Variables associated with fear of falling + fear-based activity restriction</b></p> <p><b>Depression</b><br/>OR, 5.17 ( 95% CI, 1.84–14.54)</p> | <p>“In our study, FOF and/or FAR were both significantly associated with <b>depression</b> in univariate and multivariate logistics regression model. Those with FOF + FAR were nine times more likely to be depressed than those with no FOF. [...] Strong links between depressive symptoms with FOF and/or FAR have been reported in various studies, and their association is believed to be bidirectional, where management of one condition would improve the other.”</p>                                                                                                                                                                                                                                                                                                                                                                                                                                  |

## Appendix 5: Findings from included cohort studies (n=6)

| Author, Year     | Sample                                                                                                                                                                                                      | Results                                                                                                                                                                                                                                                                                                                                                                                                                                                                                                                                                                                                                                                                                                                                                                                                         | Text description/ interpretation of findings                                                                                                                                                                                                                                                                                                                                                                                                                                                                                                                                                                                                                                                                                                                                                                                                                                 |
|------------------|-------------------------------------------------------------------------------------------------------------------------------------------------------------------------------------------------------------|-----------------------------------------------------------------------------------------------------------------------------------------------------------------------------------------------------------------------------------------------------------------------------------------------------------------------------------------------------------------------------------------------------------------------------------------------------------------------------------------------------------------------------------------------------------------------------------------------------------------------------------------------------------------------------------------------------------------------------------------------------------------------------------------------------------------|------------------------------------------------------------------------------------------------------------------------------------------------------------------------------------------------------------------------------------------------------------------------------------------------------------------------------------------------------------------------------------------------------------------------------------------------------------------------------------------------------------------------------------------------------------------------------------------------------------------------------------------------------------------------------------------------------------------------------------------------------------------------------------------------------------------------------------------------------------------------------|
| Vellas, 1987[8]  | <p>n=178</p> <p>Studied two populations:</p> <p>1) Individuals living in a retirement home (Fall victims = 59; Non-fallers=59)</p> <p>2) Individuals living at home (Fall victims = 30; Non-fallers=30)</p> | <p><u>Retirement home (n=118)</u></p> <p>Among the fall victims there was a tendency towards restriction of activity: 3% walked less indoors, 5% went outside less, 4% had no leisure activity, 7% no longer visited their children and 11% no longer visited their friends. The lack of significance (<math>P&gt;0.05</math>) is linked both to the very low level of activity on day 1 of the aged population living in retirement homes and to our small sample.</p> <p><u>At home (n=60)</u></p> <p>On day 1, the fallers and control group had identical levels of activity. Reported a significant difference in the number of participants who maintained the same level of activity after 6 months, with this number being reduced in fall victims compared to non-fallers (<math>p&lt;0.02</math>)</p> | <p>“The interpersonal relationships of the fallers were very poor: 90% did not belong to any group, 54% never visited their children, 40% never visited anybody.”</p> <p>“A fall may lead to loss of autonomy. Factors arising as a result of falls have been identified by Isaacs and his co-workers. Our prospective study confirms these findings and demonstrates the restriction of activity following a fall without fracture.”</p> <p>“Falls in elderly persons give rise to a decrease in activity and social life. The fear of recurrence often leads to 'institutionalizing' the patient. But, it is difficult to show whether falls are an indication or the cause of the loss of autonomy.”</p>                                                                                                                                                                  |
| Tinetti, 1998[9] | <p>n=1103 at baseline, 770 at 3 years follow-up</p>                                                                                                                                                         | <p><b>Effect of having 2 or more non-injurious falls on social functioning</b> (Social Activity Scale):</p> <p>Regression coefficient = -0.538 (<math>p&lt;0.05</math>)</p>                                                                                                                                                                                                                                                                                                                                                                                                                                                                                                                                                                                                                                     | <p>“While there did not appear to be an increased risk of decline in social functioning among participants experiencing a single noninjurious fall, repetitive fallers experienced a decline in social functioning in both short- and long-term follow-up analyses. The relationship between repetitive falling and decline in social functioning remained after adjusting for each category of covariates.</p> <p>Experiencing a serious fall injury, on the other hand, was only marginally associated with decline in social functioning over the 1-year follow-up, and not at all over the 3-year follow-up. Preferential loss to follow-up of persons experiencing decline in social functioning between the 1- and 3-year follow-up interviews might at least partially explain the lack of relationship between injurious falls and change in social activities.”</p> |

|                                 |                                                                                                                                                 |                                                                                                                                                                                                                                                                                                                                                                                                                                                                                                                                                                                                                                                                                                                                                                                                        |                                                                                                                                                                                                                                                                                                                                                                                                                                                                                                                                                                                                                                                                                                                                                                                                                                                                                                                                                                                                                                                                                                                                                                                                                                                                                                                                                                                                                |
|---------------------------------|-------------------------------------------------------------------------------------------------------------------------------------------------|--------------------------------------------------------------------------------------------------------------------------------------------------------------------------------------------------------------------------------------------------------------------------------------------------------------------------------------------------------------------------------------------------------------------------------------------------------------------------------------------------------------------------------------------------------------------------------------------------------------------------------------------------------------------------------------------------------------------------------------------------------------------------------------------------------|----------------------------------------------------------------------------------------------------------------------------------------------------------------------------------------------------------------------------------------------------------------------------------------------------------------------------------------------------------------------------------------------------------------------------------------------------------------------------------------------------------------------------------------------------------------------------------------------------------------------------------------------------------------------------------------------------------------------------------------------------------------------------------------------------------------------------------------------------------------------------------------------------------------------------------------------------------------------------------------------------------------------------------------------------------------------------------------------------------------------------------------------------------------------------------------------------------------------------------------------------------------------------------------------------------------------------------------------------------------------------------------------------------------|
| <p>Van der Meulen, 2014[10]</p> | <p>n=260<br/>Low level of concern about falling (n=127)<br/><br/>High level of concern about falling (n=129)<br/><br/>Follow-up = 14 months</p> | <p><b>Social participation</b><br/>(Frenchay Activities Index)<br/><u>Low level falling concern:</u><br/>Baseline mean, 39.9 (SD, 7.1)<br/>Follow-up mean, 38.8 (SD, 7.6)<br/><u>High level falling concern:</u><br/>Baseline mean, 36.8 (SD, 7)<br/>Follow-up mean, 35.7 (SD, 7.7)<br/><br/><b>p-value = 0.006</b></p>                                                                                                                                                                                                                                                                                                                                                                                                                                                                                | <p>“High and low levels of fall-related concerns predicted significant differences in ADL dysfunction and social participation that were persistent over 14 months of follow-up. [...] Accompanying effect size estimations were medium (social participation) to large (ADL dysfunction).”</p>                                                                                                                                                                                                                                                                                                                                                                                                                                                                                                                                                                                                                                                                                                                                                                                                                                                                                                                                                                                                                                                                                                                |
| <p>Pin, 2016[11]</p>            | <p>n=16583<br/>Fallers (n=411)<br/>Non-fallers (n=14205)</p>                                                                                    | <p><b>Effect of falls on social participation</b><br/>(binary variable based on if they reported performing at least one activity from a prespecified list of activities)<br/><br/>Model 2 adjusted by time, age, sociodemographic variables and health indicators:<br/>OR, 0.86 [95% CI, 0.76-0.89] (p&lt;0.001)<br/><br/>Model 3 added adjustment for frailty:<br/>OR, 0.95 [95% CI, 0.89-1.02]<br/>The interaction between initial frailty status and falling was significant (Table 4, Model 7a).<br/>Contrast analyses revealed that the probability of social participation was less among frail people than among people who did not meet any of the frailty criteria in both fallers (<math>\chi^2</math> (1)=6.93; p&lt;0.01) and non-fallers (<math>\chi^2</math> (1)=41.21; p&lt;0.001)</p> | <p>“Falling significantly decreased the probability of social participation in each of these activities and of participation in at least one of them, but only before frailty was introduced into the models (Table 3, Models 2 and 3). Frailty is indeed a strong confounder in the relationship between falls and social participation. When it is taken in consideration in multivariate models, the size of the effect for falling decreased and was no longer significant.”<br/><br/>“Then, we demonstrated the major role of frailty in the relationship between falling and social participation. The construction of the frailty phenotype (Fried et al., 2001; Santos-Eggimann et al., 2009) was based on its physical component. In this manner, frailty and falling were very close constructs. They shared similar risk factors, such as mobility disorders or bone density, and they had similar consequences in terms of disability or mortality. Moreover, we showed that they had similar consequences in terms of social participation. Thus, it may be difficult to distinguish between the two concepts and to identify a specific impact of falling (Nowak &amp; Hubbard, 2009). However, our analyses showed that the continuity in or disengagement from social activities was due to a long-term process that was amplified by health events, rather than by the falls themselves.”</p> |
| <p>Yu, 2020[12]</p>             | <p>n=4680</p>                                                                                                                                   | <p><b>Relationship between number of falls and loneliness over 3 time-points</b><br/>(3 item UCLA Loneliness Scale)<br/><br/>Regression coefficient = 0.008, SE = 0.04, p = 0.048;</p>                                                                                                                                                                                                                                                                                                                                                                                                                                                                                                                                                                                                                 | <p>“Only the number of falls was significantly correlated with the loneliness score in the next time point, and more frequent loneliness at the previous wave predicts an increased number of falls in 4 years [...] The results suggest that a vicious circle relationship exists between loneliness and falls. [...] An increased number of falls also predicted more frequent loneliness in 4 years. These findings support evidence reported in cross-</p>                                                                                                                                                                                                                                                                                                                                                                                                                                                                                                                                                                                                                                                                                                                                                                                                                                                                                                                                                 |

|                 |                                                                                                                                                                                                                        |                                                                                                                                                                                                                                                                                                                                                                                                                                          |                                                                                                                                                                                                                                                                                                                                                                                                                                                                                                                                                                                                                                                                                                                                                                                                                                                                                                                                                                                                                                                                                                                                                                                                                                                          |
|-----------------|------------------------------------------------------------------------------------------------------------------------------------------------------------------------------------------------------------------------|------------------------------------------------------------------------------------------------------------------------------------------------------------------------------------------------------------------------------------------------------------------------------------------------------------------------------------------------------------------------------------------------------------------------------------------|----------------------------------------------------------------------------------------------------------------------------------------------------------------------------------------------------------------------------------------------------------------------------------------------------------------------------------------------------------------------------------------------------------------------------------------------------------------------------------------------------------------------------------------------------------------------------------------------------------------------------------------------------------------------------------------------------------------------------------------------------------------------------------------------------------------------------------------------------------------------------------------------------------------------------------------------------------------------------------------------------------------------------------------------------------------------------------------------------------------------------------------------------------------------------------------------------------------------------------------------------------|
|                 |                                                                                                                                                                                                                        | Wave 1-2: $\beta=0.030$ ,<br>Wave 2-3: $\beta=0.068$                                                                                                                                                                                                                                                                                                                                                                                     | sectional studies that the occurrence of falls was related to social exclusion. [...] Older adults who have fallen more frequently might choose to avoid risky activities such as going outside of the home and engaging in social activities. This could lead to a discrepancy in desired and actual social engagement, which in turn results in more frequent experience of loneliness.”                                                                                                                                                                                                                                                                                                                                                                                                                                                                                                                                                                                                                                                                                                                                                                                                                                                               |
| Hajek, 2020[13] | n=8836<br><br>In total, 669 individuals changed fear of falling (FOF) status from wave 5 to wave 6. More specifically, while the onset of FOF occurred in 431 individuals, the end of FOF occurred in 238 individuals. | <b>Relationship between fear of falling and loneliness</b> (Bude and Lantermann scale)<br><br><b>Onset of FOF</b><br>$\beta=0.02$ , SE=0.02, p=NR<br><b>End of FOF</b><br>$\beta= -0.06$ , SE=0.03, p<0.05<br><br><b>Relationship between fear of falling and social isolation</b> (De Jong Gierveld Loneliness Scale)<br><br><b>Onset of FOF</b><br>$\beta=0.06$ , SE=0.03, p<0.1<br><b>End of FOF</b><br>$\beta= 0.01$ , SE=0.04, p=NR | “The end of FOF was associated with reduced depressive symptoms ( $\beta = -1.08$ , $P < .05$ ), decreased loneliness scores ( $\beta = -0.06$ , $P < .05$ ), as well as decreased negative affect ( $\beta = -0.07$ , $P < .05$ ).<br>We assume that the end of FOF has the potential to mark a decisive turning point in life for individuals who scored high in these adverse conditions (severe depressive symptoms, high loneliness, or frequent negative emotions) when they had FOF.”<br><br>“The end of FOF was associated with decreases in negative psychosocial outcome measures (depressive symptoms, negative affect, and loneliness). However, and in contrast to the other negative psychosocial outcome measures, it is quite puzzling why the end of FOF was not associated with decreases in social isolation. A possible explanation may be that even a major life event, such as the end of FOF, does not have the power to reduce social isolation because feelings of isolation may remain largely stable over the years among middle-aged and older adults with FOF. Thus, individuals developing feelings of social isolation caused by FOF, several years ago, may have difficulties in overcoming these feelings of isolation” |



## Appendix 6: Cross-sectional studies reporting on falls and social isolation/loneliness (n=11)

| Author, Year        | Sample | Results                                                                                                                                                                                                                                                                                                                                                                         | Text description/ interpretation of findings                                                                                                                                                                                                                                                                                                                                                                                                                                                                                                                                                                                                                                                                                                                                                                                                                                                                                                                                                                                                                                                                                                                                                                                                                                                                                          |
|---------------------|--------|---------------------------------------------------------------------------------------------------------------------------------------------------------------------------------------------------------------------------------------------------------------------------------------------------------------------------------------------------------------------------------|---------------------------------------------------------------------------------------------------------------------------------------------------------------------------------------------------------------------------------------------------------------------------------------------------------------------------------------------------------------------------------------------------------------------------------------------------------------------------------------------------------------------------------------------------------------------------------------------------------------------------------------------------------------------------------------------------------------------------------------------------------------------------------------------------------------------------------------------------------------------------------------------------------------------------------------------------------------------------------------------------------------------------------------------------------------------------------------------------------------------------------------------------------------------------------------------------------------------------------------------------------------------------------------------------------------------------------------|
| Finn, 2001[14]      | n=49   | <p><b>Social Resources</b><br/>(OARS Social Support Scale)</p> <p><u>Fallers (n=25)</u><br/>Mean: 2.4 (SD, 1)</p> <p><u>Non-Fallers (n=24)</u><br/>Mean: 2.0 (SD, 0.78)</p> <p>p = 0.59</p>                                                                                                                                                                                     | <p>“The data from the present study supports the conclusion that the social resources of nursing home residents are the same, regardless of a history of falls that does not change their level of previous functioning. Most nursing home residents are already in a position where they have to rely on others to come to them for visits, outings, etc.. Unlike many community-based elderly individuals most nursing home residents do not have the means or capabilities to visit others who are not in their immediate environment. Therefore, regardless of fall-history the social resources available to nursing home residents is dependent on others.”</p>                                                                                                                                                                                                                                                                                                                                                                                                                                                                                                                                                                                                                                                                 |
| Stel, 2004[2]       | n=204  | <p><b>Relationship between falls inside and decline in social activities because of a fall</b></p> <p>OR: 2.6 (95% CI: 1.1-6.5); p&lt;0.05</p>                                                                                                                                                                                                                                  | <p>“A decline in social activities after falling was significantly associated with falls inside. The current study shows that falls could also have consequences on the level of functioning in older people: respondents reported a decline in functional status (35.3%), a decline in social activities outside the house (16.7%) and physical activities (15.2%) as a direct consequence of the last fall.”</p>                                                                                                                                                                                                                                                                                                                                                                                                                                                                                                                                                                                                                                                                                                                                                                                                                                                                                                                    |
| Nicholson, 2005[15] | n=68   | <p><b>Relationship between injurious falls and social isolation</b><br/>(Lubben Social Network Scale)</p> <p><b>Social isolation</b><br/><math>\rho = -0.4</math>; <math>p &lt; 0.05</math></p> <p><b>Female</b><br/><math>\rho = -0.5</math>; <math>p = 0.01</math></p> <p><b>Family Sub Scale of Social Isolation</b><br/><math>\rho = -0.2</math>; <math>p = 0.12</math></p> | <p>“Results suggest that there is a strong positive relationship between injurious falls and social isolation. Results from this sample suggest that there is an association between lower scores of the LSNS and higher number of injurious falls, which means that increased injurious falls are related to increased social isolation. In the findings for this sample it appears that there may be some direct link between injurious falls and social isolation.</p> <p>Gender appeared to play a role when examining H4. Males as a group did not show a significant relationship between number of injurious falls and social isolation. The relationship for females as a group was positive and significant. This female sample showed a high Pearson’s correlation coefficient (see Table 4). This suggests that injurious falls may trigger some direct link to social isolation in females.”</p> <p>“When examining the family subscale of the LSNS, there was no correlation between injurious falls and social isolation (see Table 3). It is possible that as the participant continues to have injurious falls and becomes less likely to leave the house due to a fear of future injurious falls, he/she will eventually become socially isolated. This is not necessarily the case when families are involved.”</p> |

|                        |        |                                                                                                                                                                                                                                                                                                                                                                                     |                                                                                                                                                                                                                                                                                                                                                                                                                                                                                                                                                                                                                                                                                                                                                 |
|------------------------|--------|-------------------------------------------------------------------------------------------------------------------------------------------------------------------------------------------------------------------------------------------------------------------------------------------------------------------------------------------------------------------------------------|-------------------------------------------------------------------------------------------------------------------------------------------------------------------------------------------------------------------------------------------------------------------------------------------------------------------------------------------------------------------------------------------------------------------------------------------------------------------------------------------------------------------------------------------------------------------------------------------------------------------------------------------------------------------------------------------------------------------------------------------------|
|                        |        | <p><b>Friend Sub Scale of Social Isolation</b><br/> <math>\rho = -0.43</math>; <math>p &lt; 0.05</math></p>                                                                                                                                                                                                                                                                         | <p>“On the other hand, in the case of the friends subscale, there was a strong correlation between injurious falls and social isolation, such that a greater number of injurious falls was associated with a greater degree of social isolation. A possible explanation for this may be the opposite of the phenomenon with family and social isolation. The participant who has increasing injurious falls may become more likely to stay in the house thus losing contact with friends. Friends of the participants tend to be around the same age as the participant and are less likely to increase the amount of visits to the participant to make up for the lack of contact the participant suffers as a result of being homebound.”</p> |
| Iliffe, 2007[16]       | n=3139 | <p><b>Falls and social isolation</b><br/> (Lubben social network scale)<br/> <u>Socially isolated (n=368)</u><br/> 13.6% reported multiple falls in the past 12 months<br/> <u>Not socially isolated (n=2133)</u> 10.7% reported multiple falls in the past 12 months<br/> <math>p = 0.11</math></p>                                                                                | <p>Multivariate analysis taking into account all statistically significant associations shows a different pattern. The risk of social isolation appears to be associated with depressed mood and living alone, while male sex, memory impairment and perceived poor health may be weakly associated. For the other factors [multiple falls] listed in the second hypothesis, no significant associations in bivariate or multivariate analyses were found.</p>                                                                                                                                                                                                                                                                                  |
| Van Lankveld, 2011[17] | n=154  | <p><b>Relationship of falls with loneliness</b><br/> (De Jong Gierveld Loneliness scale)<br/> Correlation coefficient = 0.14<br/> <math>p = \text{not significant}</math></p>                                                                                                                                                                                                       | <p>“Health status indicators were unrelated to falls and cognitive functioning, and showed low to moderate relations with the remaining health hazards.”</p>                                                                                                                                                                                                                                                                                                                                                                                                                                                                                                                                                                                    |
| Schnittger, 2012[18]   | n=579  | <p><b>Association between history of falls and pathways of loneliness</b></p> <p><b>Emotional loneliness</b><br/> (de Jong-Gierveld Loneliness Scale)<br/> Correlation coefficient=0.134<br/> <math>p &lt; 0.003</math></p> <p><b>Social loneliness</b><br/> (de Jong-Gierveld Loneliness Scale)<br/> Correlation coefficient=0.09<br/> <math>p = \text{not significant}</math></p> | <p>“Interestingly, social support was the only outcome in which a biological variable, falls history, emerged in the final model; this may indicate the relative importance of health factors compared to psychosocial factors in the loneliness models”</p>                                                                                                                                                                                                                                                                                                                                                                                                                                                                                    |

|                  |                                                                                                                |                                                                                                                                                                                                                                                                                                                                 |                                                                                                                                                                                                                                                                                                                                                                                                                                                                                                                                                                                               |
|------------------|----------------------------------------------------------------------------------------------------------------|---------------------------------------------------------------------------------------------------------------------------------------------------------------------------------------------------------------------------------------------------------------------------------------------------------------------------------|-----------------------------------------------------------------------------------------------------------------------------------------------------------------------------------------------------------------------------------------------------------------------------------------------------------------------------------------------------------------------------------------------------------------------------------------------------------------------------------------------------------------------------------------------------------------------------------------------|
|                  |                                                                                                                | <p><b>Social support</b><br/>(Lubben Social Network Scale)<br/>Correlation coefficient= -0.247<br/>p&lt;0.003</p>                                                                                                                                                                                                               |                                                                                                                                                                                                                                                                                                                                                                                                                                                                                                                                                                                               |
| Quach, 2016[19]  | <p>n=8464</p> <p>No falls group (n=5249)<br/>One fall group (n=1352)<br/>At least two falls group (n=1863)</p> | <p><b>Social Relationship Index [mean (SD)]</b></p> <p>No falls: 3.34 (1.32)<br/>One fall: 3.24 (1.35)<br/>At least two falls: 3.08 (1.35)<br/>p&lt;0.0001</p> <p><i>Note: this is a cohort study, but the outcomes relevant to our review question are from a cross-sectional survey given to participants at baseline</i></p> | <p>“Respondents who fell had a higher prevalence of clinically significant depression symptoms, were more often not married, had fewer good friends living in their neighborhood, were less likely to attend religious services or to be a volunteer, and were less likely to have perceived support from friends or relatives, when needed. The average score of the social relationship index for fallers (3.08 or 3.24 for respondents with at least 2 falls or one fall respectively) tended to be lower than for respondents who did not fall (3.34 score of the index, p&lt;.0001)”</p> |
| Hajek, 2017[20]  | <p>n=7808</p>                                                                                                  | <p><b>Variables associated with history of falls</b></p> <p><b>Social exclusion</b><br/>(Bude and Lantermann scale)<br/><math>\beta = 0.08</math>; SE, -0.02; p&lt;0.001</p> <p><b>Loneliness</b><br/>(De Jong Gierveld Loneliness Scale)<br/><math>\beta = 0.08</math>; SE, -0.02; p&lt;0.001</p>                              | <p>Controlling for potential confounders, linear regression analysis showed that reporting a fall in the previous 12 months was associated with higher social exclusion scores (<math>\beta = .08</math>, p &lt; .001), and higher loneliness scores (<math>\beta = .08</math>, p &lt; .001). Contrarily, reporting a fall in the preceding 12 months was not associated with the number of important people in regular contact.</p>                                                                                                                                                          |
| Robins, 2018[21] | <p>n=245</p>                                                                                                   | <p><b>Relationship between falls and social isolation</b><br/>(Friendship Scale for social isolation)<br/>OR 1.03 (95% CI: 0.66-1.62);<br/>p=0.9</p>                                                                                                                                                                            | <p>No statistically significant association reported between experiencing a fall in the past 12 months and social isolation.</p>                                                                                                                                                                                                                                                                                                                                                                                                                                                              |
| Faria, 2020[22]  | <p>n=48</p>                                                                                                    | <p><b>Relationship between falls and loneliness</b><br/>(UCLA scale)<br/>p=0.384</p>                                                                                                                                                                                                                                            | <p>No statistically significant association reported between experiencing a fall in the past 6 months and loneliness</p>                                                                                                                                                                                                                                                                                                                                                                                                                                                                      |

|                           |       |                                                                                                                                                                                                                                             |                                                                                                                                                                                                                                                                                                                                                                                                                                                                                                                                                                                                                                                                                                                                                                                                                                 |
|---------------------------|-------|---------------------------------------------------------------------------------------------------------------------------------------------------------------------------------------------------------------------------------------------|---------------------------------------------------------------------------------------------------------------------------------------------------------------------------------------------------------------------------------------------------------------------------------------------------------------------------------------------------------------------------------------------------------------------------------------------------------------------------------------------------------------------------------------------------------------------------------------------------------------------------------------------------------------------------------------------------------------------------------------------------------------------------------------------------------------------------------|
| Vanden Wyngaert, 2020[23] | n=113 | <p><b>Variables associated with risk of falls</b></p> <p><b>Ability to participate in social roles and activities</b><br/>(PROMIS questionnaire)<br/>R<sup>2</sup>=0.11; p=0.01</p> <p><b>Depression</b><br/>R<sup>2</sup>=0.08; p=0.01</p> | <p>“Regarding the PROMIS questionnaire, low associations were found between measures of the risk of falls and the appreciation of participation in social roles and activities on the one hand (R<sup>2</sup> = 0.11), and depression on the other (R<sup>2</sup> = 0.08)”</p> <p>“Remarkably, the risk of falls on itself was identified as a determinant of difficulties on psycho-social well-being (i.e. depression and social isolation) and of objective health utility [...]</p> <p>As such, falls and an increased risk of falls can deter subjects to continue their outdoor social activities, resulting in changes in means and location of social contact to less stimulating activities (e.g. a phone call rather than a rendezvous point), promoting the risk of impairments in mental health and depression”</p> |
|---------------------------|-------|---------------------------------------------------------------------------------------------------------------------------------------------------------------------------------------------------------------------------------------------|---------------------------------------------------------------------------------------------------------------------------------------------------------------------------------------------------------------------------------------------------------------------------------------------------------------------------------------------------------------------------------------------------------------------------------------------------------------------------------------------------------------------------------------------------------------------------------------------------------------------------------------------------------------------------------------------------------------------------------------------------------------------------------------------------------------------------------|

1  
2  
3  
4  
5  
6  
7  
8  
9  
10  
11  
12  
13  
14  
15  
16  
17  
18  
19  
20  
21  
22  
23  
24  
25  
26  
27  
28  
29  
30  
31  
32  
33  
34  
35  
36  
37  
38  
39  
40  
41  
42  
43  
44  
45  
46  
47

**Appendix 7: Cross-sectional studies reporting on fear of falling and activity restriction due to fear of falling (n= 15)**

| Author, Year      | Sample | Results                                                                                                                                                                                                                                                                                                                                                                                                                                                                                                                             | Text description/ interpretation of findings                                                                                                                                                                                                                                                                                                                                                                                                                                                                                                                                                                                                                                                                                                                                                                                                                                                                                                                                                                                                                                                                                                          |
|-------------------|--------|-------------------------------------------------------------------------------------------------------------------------------------------------------------------------------------------------------------------------------------------------------------------------------------------------------------------------------------------------------------------------------------------------------------------------------------------------------------------------------------------------------------------------------------|-------------------------------------------------------------------------------------------------------------------------------------------------------------------------------------------------------------------------------------------------------------------------------------------------------------------------------------------------------------------------------------------------------------------------------------------------------------------------------------------------------------------------------------------------------------------------------------------------------------------------------------------------------------------------------------------------------------------------------------------------------------------------------------------------------------------------------------------------------------------------------------------------------------------------------------------------------------------------------------------------------------------------------------------------------------------------------------------------------------------------------------------------------|
| Tinetti, 1994[24] | n=1103 | <p><b>Fear of falling</b><br/>(Falls Efficacy Scale – modified so low score corresponds with low confidence or greater fear)</p> <p><u>Fallers</u><br/>Mean, 79.8 (SD 23.4)</p> <p><u>Non-fallers</u><br/>Mean, 88.1 (SD 17.9)</p> <p>p &lt; .0001</p> <p><b>Activity restriction because of fear of falling</b><br/>Fallers = 24%<br/>Non-fallers =15%<br/>chi-square= 13.1; p &lt; 0.001</p>                                                                                                                                      | <p>In order to examine the impact of recent falls, we also determined the proportion of subjects reporting fear and the mean fall-related efficacy scores separately for subjects who did and did not experience a fall in the year prior to the interview. The proportion of subjects reporting a decrease in activity because of fear of falling was 24% among fallers vs 15% among non-fallers (chi-square= 13.1; p &lt; .001). The mean fall-related efficacy scores were 79.8 (SD 23.4) and 88.1 (SD 17.9) among fallers and non-fallers, respectively (p &lt; .0001).</p>                                                                                                                                                                                                                                                                                                                                                                                                                                                                                                                                                                       |
| Howland, 1998[25] | n=266  | <p><b>Relationship between falls and fear of falling</b><br/>OR: 2.498 (95% CI: 1.013-6.159); p=0.05</p> <p><b>Relationship between falls and activity curtailment among those afraid of falling</b><br/>OR: 1.094 (95% CI: 0.376-3.177); p=0.869</p> <p><b>Relationship between social support and activity curtailment among those afraid of falling</b><br/>(Social Support Scale)<br/>OR: 1.574 (95% CI: 1.082-2.290); p=0.018<br/><i>Note: Here a higher social support score indicates lower levels of social support</i></p> | <p>“The contribution of personal falls experience to fear of falling was apparent. Those who suffered a previous fall were more likely to have a fear of falling.”</p> <p>“Surprisingly, neither the degree of fear of falling nor the experience of falls was associated with activity restriction. This finding suggests that activity curtailment is not just associated with extreme levels of fear. The presence of social support was, however, important. Those who could rely on others or talk with friends about falling were least likely to report activity curtailment. Thus, support of family and friends may be an important prerequisite for continuing to remain active even in the face of fear of falling. This support may serve as a buffer to the potentially debilitating consequences of fear of falling. It is possible this support is manifested as encouragement for remaining active.”</p> <p>“Those who curtailed activities [...] did not differ with respect to social integration but were significantly (p = .024) less likely to be able to rely on friends or relatives in times of crisis (social support)”</p> |
| Murphy, 2002[1]   | n=1064 | <p><b>Variables independently associated with activity restriction in participants with fear of falling</b></p>                                                                                                                                                                                                                                                                                                                                                                                                                     | <p>“We found that a history of an injurious fall within the past year, slow timed physical performance, two or more chronic conditions, and</p>                                                                                                                                                                                                                                                                                                                                                                                                                                                                                                                                                                                                                                                                                                                                                                                                                                                                                                                                                                                                       |

|                       |        |                                                                                                                                                                                                                                                                                                                                          |                                                                                                                                                                                                                                                                                                                                                                                                                                                                                                                                                                                                    |
|-----------------------|--------|------------------------------------------------------------------------------------------------------------------------------------------------------------------------------------------------------------------------------------------------------------------------------------------------------------------------------------------|----------------------------------------------------------------------------------------------------------------------------------------------------------------------------------------------------------------------------------------------------------------------------------------------------------------------------------------------------------------------------------------------------------------------------------------------------------------------------------------------------------------------------------------------------------------------------------------------------|
|                       |        | <p><i>Injurious fall</i><br/>Adjusted relative risk (ARR): 1.36 (95% CI, 1.11-1.66); p=0.003</p> <p><i>Two or more chronic conditions</i><br/>ARR: 1.34 (95% CI, 1.08-1.65); p=0.007</p> <p><i>Slow-timed physical performance</i><br/>ARR: 1.44 (95% CI, 1.18-1.75); p=0.0004</p>                                                       | depressive symptoms were all independently associated with activity restriction.”                                                                                                                                                                                                                                                                                                                                                                                                                                                                                                                  |
| Apikomonkon, 2003[26] | n=546  | <p><b>Relationship between falls and activity restriction</b><br/>Chi-square=5.49, p&lt;0.05</p> <p><b>Relationship between fear of falling and activity restriction</b><br/>Chi-square=23.27, p&lt;0.001</p>                                                                                                                            | <p>“Compared with non-fallers, the older persons with falls experiences were more likely to have activity restriction (25% vs 16%). The Chi-square test indicated that fall history was associated with activity restriction measured by dichotomous question.”</p> <p>“Older people with FOF were more likely to have activity restriction (26% vs 10%). The FOF using the SAFE Thai version was significantly associated with activity restriction as measured by dichotomous question.”</p>                                                                                                     |
| Gagnon, 2005[3]       | n=105  | <p><b>Variables associated with fear of falling</b><br/>(Comparing subjects with no/slight fear and subjects with moderate/severe fear)</p> <p><b>Social support</b><br/>(confiding-relationships component of the Bedford Life Events and Difficulties Schedule modified for elderly subjects)</p> <p>Wald chi-square= 3.77; p=0.05</p> | “The following secondary independent variables were significantly associated with categorical fear of falling: dizziness (Wald chi-square 6.58; p 0.01), total number of medications (Wald chi-square 5.40; p 0.02), and social support (Wald chi-square 3.77; p 0.05). (Note: Higher scores mean less support.)”                                                                                                                                                                                                                                                                                  |
| Zijlstra, 2007[27]    | n=4376 | <p><b>Variables significantly associated with avoidance of activity due to fear of falling</b></p> <p><b>Multiple falls in past 6 months</b><br/>OR: 1.97 (95% CI, 1.52-2.54)</p>                                                                                                                                                        | <p>“When fear of falling was added as an additional variable (model 3; Table 3), odds ratios of all variables that showed significance in model 2 decreased. Nevertheless, the association for the highest age group (<math>\geq 80</math> years), fair and poor perceived general health and multiple falls with avoidance of activities remained statistically significant.</p> <p>Our findings regarding avoidance of activity remained fairly similar when fear of falling was entered into the logistic model. Although sometimes, often and very often experiencing fear of falling were</p> |

1  
2  
3  
4  
5  
6  
7  
8  
9  
10  
11  
12  
13  
14  
15  
16  
17  
18  
19  
20  
21  
22  
23  
24  
25  
26  
27  
28  
29  
30  
31  
32  
33  
34  
35  
36  
37  
38  
39  
40  
41  
42  
43  
44  
45  
46  
47

|                            |               |                                                                                                                                                                                                                                                                                                                                                                                                                                                                                                           |                                                                                                                                                                                                                                                                                                                                                                                                                                                                                                                                                                                                                                                                                                                                                                                                                                                                                                                                                                                                                                                                                                                                                                                                                                                                                                |
|----------------------------|---------------|-----------------------------------------------------------------------------------------------------------------------------------------------------------------------------------------------------------------------------------------------------------------------------------------------------------------------------------------------------------------------------------------------------------------------------------------------------------------------------------------------------------|------------------------------------------------------------------------------------------------------------------------------------------------------------------------------------------------------------------------------------------------------------------------------------------------------------------------------------------------------------------------------------------------------------------------------------------------------------------------------------------------------------------------------------------------------------------------------------------------------------------------------------------------------------------------------------------------------------------------------------------------------------------------------------------------------------------------------------------------------------------------------------------------------------------------------------------------------------------------------------------------------------------------------------------------------------------------------------------------------------------------------------------------------------------------------------------------------------------------------------------------------------------------------------------------|
|                            |               | <p><b>Aged 80 years or older</b><br/>OR: 1.56 (95% CI, 1.24-1.95)</p> <p><b>Fair perceived general health</b><br/>OR: 2.92 (95% CI, 2.43-3.52)</p> <p><b>Poor perceived general health</b><br/>OR: 5.7 (95% CI, 3.57-9.12)</p>                                                                                                                                                                                                                                                                            | <p>strongly associated with avoidance of activity, higher age (<math>\geq 80</math> years), fair and poor perceived health and multiple falls remained independently associated with avoidance of activity in community-living older people. This implies that interventions aimed at reducing avoidance of activity should not focus on fear of falling alone, but on other modifiable factors, like falls, as well”</p>                                                                                                                                                                                                                                                                                                                                                                                                                                                                                                                                                                                                                                                                                                                                                                                                                                                                      |
| <p>Ilfie,<br/>2007[16]</p> | <p>n=3139</p> | <p><b>Relationship between fear of falling and social isolation</b><br/>(Lubben Social Network Scale)</p> <p>OR: 1.21 (95% CI, 0.88-1.65)</p>                                                                                                                                                                                                                                                                                                                                                             | <p>Multivariate analysis taking into account all statistically significant associations shows a different pattern. The risk of social isolation appears to be associated with depressed mood and living alone, while male sex, memory impairment and perceived poor health may be weakly associated. For the other factors [(fear of falling)] listed in the second hypothesis, no significant associations in bivariate or multivariate analyses were found.</p>                                                                                                                                                                                                                                                                                                                                                                                                                                                                                                                                                                                                                                                                                                                                                                                                                              |
| <p>Curcio,<br/>2009[4]</p> | <p>n=1668</p> | <p><b>Variables associated with activity restriction related to fear of falling</b></p> <p><b>At least 1 fall in past year</b><br/>OR: 1.48 (95% CI, 1.18-1.86); p=0.001</p> <p><b>Low social participation</b><br/>OR: 1.52 (95% CI, 1.20-1.92); p&lt;0.01</p> <p><b>Poor perceived health</b><br/>OR: 1.38 (95% CI, 1.06-1.79)</p> <p><b>Difficulties in activities of daily living</b><br/>OR: 1.65 (95% CI, 1.16-2.32)</p> <p><b>Decreased physical activity</b><br/>OR: 1.35 (95% CI, 1.06-1.70)</p> | <p>“Those who had activity restriction related to fear of falling were significantly more likely to have had a fall within the past year, with a trend to suffer recurrent falls and injurious falls”</p> <p>“Table 3 shows the bivariate relationships between activity restriction related to fear of falling and psychosocial factors. Activity restriction related to fear of falling had a strong bivariate association with poor perceived health, depression, low social participation, and poor life satisfaction.”</p> <p>“A second model was then constructed with the psychosocial associated factors and other clinical and functional covariates (see Table 4). After adjustment, functional and clinical factors remained independently associated with activity restriction related to fear of falling. Only depression and poor perceived health variables emerged as independent factors.”</p> <p>“logistic regression analyses for activity restriction related to fear of falling. In the first model, 19 demographic, functional, and health-related variables with p values less than .05 derived from the bivariate analysis were entered into the logistic regression as independent variables. Difficulties in ADL, decreased physical activity, polypharmacy, and</p> |



|                |       |                                                                                                                                                                                                                                                                                                                                                                                                                                                |                                                                                                                                                                                                                                                                                                                                                                                                                                                                                                                                                                                                                                                                                                                                                                                                                                                                                                                                                                                                                                                                                                                                                                                                                                                                                                                                                                                                                                                                                                                                                                                                                                                                                                                                                                                                                                                                 |
|----------------|-------|------------------------------------------------------------------------------------------------------------------------------------------------------------------------------------------------------------------------------------------------------------------------------------------------------------------------------------------------------------------------------------------------------------------------------------------------|-----------------------------------------------------------------------------------------------------------------------------------------------------------------------------------------------------------------------------------------------------------------------------------------------------------------------------------------------------------------------------------------------------------------------------------------------------------------------------------------------------------------------------------------------------------------------------------------------------------------------------------------------------------------------------------------------------------------------------------------------------------------------------------------------------------------------------------------------------------------------------------------------------------------------------------------------------------------------------------------------------------------------------------------------------------------------------------------------------------------------------------------------------------------------------------------------------------------------------------------------------------------------------------------------------------------------------------------------------------------------------------------------------------------------------------------------------------------------------------------------------------------------------------------------------------------------------------------------------------------------------------------------------------------------------------------------------------------------------------------------------------------------------------------------------------------------------------------------------------------|
|                |       | <p><b>Polypharmacy</b><br/>OR: 1.56 (95% CI, 1.14-2.14)</p> <p><b>Below poverty level</b><br/>OR: 1.32 (95% CI, 1.05-1.65)</p>                                                                                                                                                                                                                                                                                                                 | <p>extreme poverty were independently associated with activity restriction related to fear of falling. A second model was then constructed with the psychosocial associated factors and other clinical and functional covariates (see Table 4). After adjustment, functional and clinical factors remained independently associated with activity restriction related to fear of falling.”</p>                                                                                                                                                                                                                                                                                                                                                                                                                                                                                                                                                                                                                                                                                                                                                                                                                                                                                                                                                                                                                                                                                                                                                                                                                                                                                                                                                                                                                                                                  |
| Kara, 2009[28] | n=47  | <p><b>Relationship between fear of falling and loneliness</b><br/>(Philadelphia Geriatric Center Morale Scale)<br/><math>\rho= 0.258</math>; <math>p=</math>Not significant</p>                                                                                                                                                                                                                                                                | <p>When the correlation between the fear of falling and the subscales of the Philadelphia Geriatric Center Morale Scale is examined, no correlations were found (Table 5).</p>                                                                                                                                                                                                                                                                                                                                                                                                                                                                                                                                                                                                                                                                                                                                                                                                                                                                                                                                                                                                                                                                                                                                                                                                                                                                                                                                                                                                                                                                                                                                                                                                                                                                                  |
| Dias, 2011[5]  | n=113 | <p><b>Variables associated with activity restriction due to fear of falling</b><br/>(compared to no FOF or FOF alone)</p> <p><b>Fear of falling intensity</b><br/>Mean 3.4 (SD, 0.9); <math>p&lt;0.0</math></p> <p><b>Depression</b><br/>Chi-square=15.2, <math>p=0.004</math></p> <p><b>Exhaustion</b><br/>Chi-square=9.2, <math>p=0.01</math></p> <p><b>Participation in social activities</b><br/>Chi-square=10.4, <math>p=0.016</math></p> | <p>“The three groups were statistically different in relation to FOF evaluated using the question about fear intensity. The group that reported FOF and activity restriction demonstrated higher levels of fear when compared with the other groups”</p> <p>“The variables that best discriminated the groups were depression, exhaustion and participation in social activities, demonstrated in the diagram (Figure 1). For the grouping obtained through the Chi-square Automatic Interaction Detection (CHAID) method, it may be observed that the first distinctive characteristic was depression, evaluated using GDS. Those with positive symptoms for depression showed 90% chance of restricting activities due to fear of falling.</p> <p>Additionally, the presence of depressive symptoms seems to modulate the factors that are associated with activity restriction due to fear of falling. A greater risk for depression has been associated with inadequate evaluation of coping self-efficacy in stressful events of life. It is worth noting that the participants of the present study who restricted activities by FOF showed lower self-efficacy in relation to the other participants. Thus, it is possible that elders with depressive symptoms perceive themselves less capable of performing certain tasks and, because of that, restrict their activities.</p> <p>Out of the elders that did not have depressive symptoms, those who had positive result for exhaustion of the frailty phenotype had 78% chance of restricting activities due to fear of falling.”</p> <p>“Out of the ones who did not show positive result for exhaustion, the other distinctive characteristic was participation in social activities. Those who stopped performing activities had 73% chance of restricting activities due to fear of falling.</p> |



|                           |        |                                                                                                                                                                                                                                                |                                                                                                                                                                                                                                                                                                                                                      |
|---------------------------|--------|------------------------------------------------------------------------------------------------------------------------------------------------------------------------------------------------------------------------------------------------|------------------------------------------------------------------------------------------------------------------------------------------------------------------------------------------------------------------------------------------------------------------------------------------------------------------------------------------------------|
|                           |        |                                                                                                                                                                                                                                                | Participation in social activities was the last discriminatory factor for the studied sample; however this variable did not show association with activity restriction in the bivariate analysis. It is possible that this difference in relation to the participation in social activities only occurs for a subgroup and not for the whole sample” |
| Mendes da Costa, 2012[29] | n=501  | <p><b>Relationship between activity restriction due to fear of falling and number of falls in past 12 months</b></p> <p>2 or more falls<br/>OR, 3.04 (95% CI, 1.70-5.42)</p> <p>1 fall<br/>OR, 1.33 (95% CI, 0.66-2.68)</p>                    | “activity restriction was increased significantly with age and with the number of falls within the past 12 months, affecting however one quarter of the subjects who did not fall. In the logistic regression model, these associations remained significant”                                                                                        |
| Choi, 2015[30]            | n=4247 | <p><b>Relationship between falls and fear-induced activity restriction</b></p> <p><u>Previous fall experiences</u><br/>OR, 2.12 [95% CI, 0.96-4.67]<br/>p=0.062</p> <p><u>Injurious falls</u><br/>OR, 3.03 [95% CI, 1.21-7.54]<br/>p=0.008</p> | Characteristics independently associated with fear-induced activity restriction were low socioeconomic status, cognitive impairment, difficulty with activities of daily living, and a history of injurious falls.                                                                                                                                   |
| Ferreira, 2018[31]        | n=7935 | <p><b>Relationship between fear of falling because of sidewalk defects and social participation</b></p> <p>OR 1.01 (95% CI: 0.99-1.04)</p>                                                                                                     | “As in the univariate analysis, the fear of falling because of defects in sidewalks and the perception of violence in the neighborhood were not associated with social participation.”                                                                                                                                                               |
| Petrinec, 2020[32]        | n=108  | <p><b>Relationship between fear of falling and social functioning</b></p> <p>(Medical Outcomes Study 36-item Short-Form General Health Survey)</p> <p><math>\beta = -0.29</math></p>                                                           | “Fear of falls was an independent predictor for role physical, physical functioning, and social functioning.”                                                                                                                                                                                                                                        |
| Merchant, 2020[7]         | n=493  | <p><b>Variables associated with fear of falling alone</b></p> <p><b>Number of falls</b></p>                                                                                                                                                    | “The multivariate logistics regression in Table 2 shows that female sex (OR = 3.54; 95% CI = 1.82–6.90), number of medications (OR = 1.28; 95% CI = 1.03–13.60), prefrail or frail (OR = 2.17; 95% CI = 1.26–3.73), depression (OR = 4.90; 95% CI = 1.06–22.67), and number of falls in the                                                          |

|  |  |                                                                                                                                                                                                                                                                                                                                                                                                                                                                           |                                                                                                                                                                                                                                                                                                                                                                                                                                                                                                                                                                                                                                                                                                                                                                                                                                                                                               |
|--|--|---------------------------------------------------------------------------------------------------------------------------------------------------------------------------------------------------------------------------------------------------------------------------------------------------------------------------------------------------------------------------------------------------------------------------------------------------------------------------|-----------------------------------------------------------------------------------------------------------------------------------------------------------------------------------------------------------------------------------------------------------------------------------------------------------------------------------------------------------------------------------------------------------------------------------------------------------------------------------------------------------------------------------------------------------------------------------------------------------------------------------------------------------------------------------------------------------------------------------------------------------------------------------------------------------------------------------------------------------------------------------------------|
|  |  | <p>OR, 2.13 ( 95% CI, 1.20–3.78)<br/>p&lt;0.05</p> <p><b>Social isolation</b><br/>OR, 0.99 ( 95% CI, 0.51–1.89)<br/>p=not significant</p> <p><b>Variables associated with fear of falling + fear-based activity restriction</b></p> <p><b>Number of falls</b><br/>OR, 1.4 ( 95% CI, 0.94–2.20)<br/>p=not significant</p> <p><b>Social isolation</b><br/>OR, 1.7 ( 95% CI, 0.82–3.55)<br/>p=not significant</p> <p><b>Sarcopenia</b><br/>OR, 8.13 (95% CI, 1.52–43.41)</p> | <p>past 12 months (OR = 2.13; 95% CI = 1.20–3.78) were significantly associated with FOF. Only sarcopenia (OR = 8.13; 95% CI = 1.52–43.41) and depression (OR = 5.17; 95% CI = 1.84–14.54) were significantly associated with FOF + FAR.”</p> <p>“<b>History of falling</b> is a well-known risk factor for FOF and/or FAR as persons who have experienced falls are more likely to develop fear. However, three-quarters of those with FOF and two-thirds of those with FOF + FAR had never experienced a fall in our study”</p> <p>“<b>Social isolation</b> is another factor that is poorly studied. In our study, one in three older adults with FOF + FAR were at risk of social isolation compared with one in five with no FOF”</p> <p>“Prefrailty, frailty, and <b>sarcopenia</b> have significant association with FOF and/or FAR in both univariate and multivariate analysis.”</p> |
|--|--|---------------------------------------------------------------------------------------------------------------------------------------------------------------------------------------------------------------------------------------------------------------------------------------------------------------------------------------------------------------------------------------------------------------------------------------------------------------------------|-----------------------------------------------------------------------------------------------------------------------------------------------------------------------------------------------------------------------------------------------------------------------------------------------------------------------------------------------------------------------------------------------------------------------------------------------------------------------------------------------------------------------------------------------------------------------------------------------------------------------------------------------------------------------------------------------------------------------------------------------------------------------------------------------------------------------------------------------------------------------------------------------|

Appendix 8: Relevant findings from qualitative studies (n=7)

| Author, Year           | Qualitative analysis approach, and sample size | Results                                                                                                                                                                                                                                                                                                                                                                                                                                                                                                                                                                                                                                                                                                                                                                                                                                                                                                                                                                                                                                                                                                                                                                                                                                                                                                                                                                                                                                                                                                                                                                                                                                                                                                                                                                                                                                                                                                                                                                                                                                                                                                                                                                                                                                                               |
|------------------------|------------------------------------------------|-----------------------------------------------------------------------------------------------------------------------------------------------------------------------------------------------------------------------------------------------------------------------------------------------------------------------------------------------------------------------------------------------------------------------------------------------------------------------------------------------------------------------------------------------------------------------------------------------------------------------------------------------------------------------------------------------------------------------------------------------------------------------------------------------------------------------------------------------------------------------------------------------------------------------------------------------------------------------------------------------------------------------------------------------------------------------------------------------------------------------------------------------------------------------------------------------------------------------------------------------------------------------------------------------------------------------------------------------------------------------------------------------------------------------------------------------------------------------------------------------------------------------------------------------------------------------------------------------------------------------------------------------------------------------------------------------------------------------------------------------------------------------------------------------------------------------------------------------------------------------------------------------------------------------------------------------------------------------------------------------------------------------------------------------------------------------------------------------------------------------------------------------------------------------------------------------------------------------------------------------------------------------|
| Ward-Griffin, 2004[33] | Phenomenological approach<br><br>n=9           | <b><i>“Restricting activities was a second strategy identified by the participants, which involved avoiding certain social activities or/and physical environments. Participants used this strategy when they wanted to “play it safe” in times of inclement weather or in situations where ambulation might be difficult.</i></b> Precarious weather conditions seemed to heighten their awareness and fear of falling. As Sarah explained, “I do not fear falling, except around steps. They terrify me to death [along with] scaffolding around the town—that bothers me. Little kids on bicycles on the sidewalk— that bothers me. And I am restricted to the house when there’s fresh snow on the ground.” Similarly Wilfred stated, “When it’s really, really icy, and I don’t have to go out, I don’t drive the car. I don’t go out either.””                                                                                                                                                                                                                                                                                                                                                                                                                                                                                                                                                                                                                                                                                                                                                                                                                                                                                                                                                                                                                                                                                                                                                                                                                                                                                                                                                                                                                  |
| Meric, 2007[34]        | Analysis approach not reported<br><br>n=22     | <b><i>“After having a falling experience, elderly individuals had behavioral changes, which decreased the competency of achieving daily life activities, such as staying away from the crowded environments, not going outside alone, acting very slowly, not able to do daily activities alone:</i></b><br>“... I can't go out anymore. I haven't been out alone for 2 years, there are always people next to me.” (75; woman).<br>“... I take my man's arm on the street, I can't get out much in case I fall into the street” (77; woman).””                                                                                                                                                                                                                                                                                                                                                                                                                                                                                                                                                                                                                                                                                                                                                                                                                                                                                                                                                                                                                                                                                                                                                                                                                                                                                                                                                                                                                                                                                                                                                                                                                                                                                                                       |
| Schmid, 2009[35]       | Latent content analysis<br><br>n=42            | <b><i>“Quotes regarding the subsequent consequences of poststroke falls categorized into the following three themes: (1) limiting activity and participation, (2) increasing dependence, and (3) developing a fear of falling”</i></b><br><br><b><i>“Limiting activity: Because falling became common for some participants, talk about strategies for the prevention of future falls was common and emerged naturally during interviews. A significant consequence was the choice to limit everyday life activities at home and in the community to help manage and prevent falls”</i></b><br><br><b><i>“Increasing dependence: Participants discussed their dependence on assistive devices such as walkers, canes, and wheelchairs to reduce falls and feel secure in their environment. Some participants indicated use of the furniture, walls, or people as alternative assistive devices. Many discussed dependence on caregivers for maintaining balance and preventing falls. Participants easily became isolated because they were fearful to leave their home, and some were even fearful to move about their own home, becoming increasingly dependent.”</i></b><br><br><b><i>“Developing fear of falling: This initial experience of falling with stroke onset was a traumatic event that consequently resulted in participants expressing fear that future falls would mean having another stroke. They also discussed the subsequent development of fear of falling and the fear of being left on the floor for hours at a time. Participants described genuine fear of falling and fear about being hurt as well as the subsequent impact on function and independence. Some participants discussed falls becoming a frequent event and a common and pervasive concern; fear, worry, and concern became a daily consequence of poststroke falls. Some participants were fearful that they would fall while out in the community and addressed the embarrassment of a public fall. They were concerned about how they looked while walking around and seemed to be worried about the stigma related to falls and decreased mobility. Managing falls and fear of falling in everyday life became an important aspect of poststroke adjustment.”</i></b> |

|                       |                                                   |                                                                                                                                                                                                                                                                                                                                                                                                                                                                                                                                                                                                                                                                                                                                                                                                                                                                                                                                                                                                                                                                                                                                                                                                                                 |
|-----------------------|---------------------------------------------------|---------------------------------------------------------------------------------------------------------------------------------------------------------------------------------------------------------------------------------------------------------------------------------------------------------------------------------------------------------------------------------------------------------------------------------------------------------------------------------------------------------------------------------------------------------------------------------------------------------------------------------------------------------------------------------------------------------------------------------------------------------------------------------------------------------------------------------------------------------------------------------------------------------------------------------------------------------------------------------------------------------------------------------------------------------------------------------------------------------------------------------------------------------------------------------------------------------------------------------|
| <p>Faes, 2010[36]</p> | <p>Grounded theory approach</p> <p>n=10</p>       | <p><b><i>“Patients described social withdrawal and attributed this to their fear of falling and the loss of physical capabilities after falling. Patients recognised that they became (more) dependent on their caregiver after falling. One patient experienced social benefits from her fall, since she now receives more attention from her children”</i></b></p> <p>“P#1 I can’t travel anymore because of my limited mobility. I injured my leg in a fall.<br/>P#4 I stay at home more often and don’t visit my friends anymore. I am afraid to fall when I go out.<br/>P#5 My grandson is almost one year old. I still haven’t seen his room. His room is upstairs; I am too anxious to fall when climbing the stairs.”</p> <p><b><i>“Furthermore, our findings confirmed the consequences of falls in cognitively unimpaired older persons that are mentioned in the literature; these include a fear of falling and social withdrawal due to the fear of falling and physical limitations”</i></b></p>                                                                                                                                                                                                                  |
| <p>Chiu, 2011[37]</p> | <p>Focussed ethnographic approach</p> <p>n=18</p> | <p>“Following their initial fall, it appeared that changes occurred in individuals’ independent living and use of informal support networks. While activities of daily living are continued either independently, or with help from —hourly maids during the rehabilitation period or for longer, <b><i>recreational activities usually were a second priority and were soon discontinued.</i></b> Mah-Jong, one of the most popular tile games among Chinese was mentioned by 12 respondents as a favourite pass time. Other social activities mentioned included Cantonese opera, volunteering within their communities, and dim sum with friends. <b><i>After a fall, these activities were interrupted for two main reasons: 1) lack of transportation means and 2) lower mobility capabilities. Feelings of loneliness arose as the respondents felt that they were cut off from their friends.”</i></b></p> <p>“Intuitive changes included modifications made to personal behaviours. <b><i>Avoidance behaviour was reported as an intuitive change. Specifically, fallers would avoid outdoor activities.</i></b> Other intuitive changes include being more careful ("taking care") when walking and slowing down.”</p> |
| <p>Host, 2011[38]</p> | <p>Phenomenographic approach</p> <p>n=14</p>      | <p>“Others <b><i>stopped doing certain activities to avoid falling and they did not choose activities that made them scared and nervous and caused bodily pain. They thus perceived that physical activity was not good and therefore stopped the activity.</i></b> The families and the general practitioner (GP) supported their choices. Conversely, some felt that it was a loss if they had to stop activities they had enjoyed because it increased their risk of falling.”</p> <p><b><i>“Fall accidents had implications for older people’s identity and autonomy, and they could lead to social isolation.”</i></b></p> <p>“Conversely, social interaction in the context of participation in fall-prevention activities was not always welcomed because it placed the respondents in a context in which they did not like to see themselves.”</p> <p>“For others, <b><i>support from professionals was important in how they coped with falls</i></b> and their prevention. The GP was a good support when they needed knowledge about appropriate and applicable preventive activities.”</p>                                                                                                                          |
| <p>Xu, 2019[39]</p>   | <p>Thematic analysis</p> <p>n=17</p>              | <p>Identified theme of restricted mobility and social participation.</p>                                                                                                                                                                                                                                                                                                                                                                                                                                                                                                                                                                                                                                                                                                                                                                                                                                                                                                                                                                                                                                                                                                                                                        |

1  
2  
3  
4  
5  
6  
7  
8  
9  
10  
11  
12  
13  
14  
15  
16  
17  
18  
19  
20  
21  
22  
23  
24  
25  
26  
27  
28  
29  
30  
31  
32  
33  
34  
35  
36  
37  
38  
39  
40  
41  
42  
43  
44  
45  
46  
47

|  |  |                                                                                                                                                                                                                                                                                                                                                                                                                                                                                                                                                                                                     |
|--|--|-----------------------------------------------------------------------------------------------------------------------------------------------------------------------------------------------------------------------------------------------------------------------------------------------------------------------------------------------------------------------------------------------------------------------------------------------------------------------------------------------------------------------------------------------------------------------------------------------------|
|  |  | <p><b><i>“Stroke participants felt that they were restricted after the fall, particularly around having reduced balance, and this affected their mobility functions and degree of social participation:</i></b></p> <p>I am getting worse, especially my balance. I used to walk for a short distance outside, but now I can’t. (S7)</p> <p>There was a big difference ... I used to walk with walking stick. But I have not been able to walk since that fall. (S8)</p> <p>Last time I could take public transport, go to [central area] and take a walk, now it’s too difficult for me. (S1)”</p> |
|--|--|-----------------------------------------------------------------------------------------------------------------------------------------------------------------------------------------------------------------------------------------------------------------------------------------------------------------------------------------------------------------------------------------------------------------------------------------------------------------------------------------------------------------------------------------------------------------------------------------------------|

For peer review only

## References

1. Murphy SL, Williams CS, Gill TM. Characteristics associated with fear of falling and activity restriction in community-living older persons. *J Am Geriatr Soc*. 2002 Mar;50(3):516-20.
2. Stel VS, Smit JH, Pluijm SM, Lips P. Consequences of falling in older men and women and risk factors for health service use and functional decline. *Age Ageing*. 2004 Jan;33(1):58-65.
3. Gagnon N, Flint AJ, Naglie G, Devins GM. Affective correlates of fear of falling in elderly persons. *Am J Geriatr Psychiatry*. 2005 Jan;13(1):7-14.
4. Curcio CL, Gomez F, Reyes-Ortiz CA. Activity restriction related to fear of falling among older people in the Colombian Andes mountains: are functional or psychosocial risk factors more important? *J Aging Health*. 2009 Jun;21(3):460-79.
5. Dias RC, Freire MT, Santos EG, Vieira RA, Dias JM, Perracini MR. Characteristics associated with activity restriction induced by fear of falling in community-dwelling elderly. *Rev Bras Fisioter*. 2011 Sep-Oct;15(5):406-13.
6. Nakaya N, Kogure M, Saito-Nakaya K, Tomata Y, Sone T, Kakizaki M, et al. The association between self-reported history of physical diseases and psychological distress in a community-dwelling Japanese population: the Ohsaki Cohort 2006 Study. *Eur J Public Health*. 2014 Feb;24(1):45-9.
7. Merchant RA, Chen MZ, Wong BLL, Ng SE, Shirooka H, Lim JY, et al. Relationship Between Fear of Falling, Fear-Related Activity Restriction, Frailty, and Sarcopenia. *J Am Geriatr Soc*. 2020 Nov;68(11):2602-8.
8. Vellas B, Cayla F, Bocquet H, de Pemille F, Albarede JL. Prospective study of restriction of activity in old people after falls. *Age Ageing*. 1987 May;16(3):189-93.
9. Tinetti ME, Williams CS. The effect of falls and fall injuries on functioning in community-dwelling older persons. *J Gerontol A Biol Sci Med Sci*. 1998 Mar;53(2):M112-9.
10. van der Meulen E, Zijlstra GA, Ambergen T, Kempen GI. Effect of fall-related concerns on physical, mental, and social function in community-dwelling older adults: a prospective cohort study. *J Am Geriatr Soc*. 2014 Dec;62(12):2333-8.
11. Pin S, Spini D. Impact of falling on social participation and social support trajectories in a middle-aged and elderly European sample. *SSM Popul Health*. 2016 Dec;2:382-9.
12. Yu K, Wu S, Jang Y, Chou CP, Wilber KH, Aranda MP, et al. Longitudinal Assessment of the Relationships Between Geriatric Conditions and Loneliness. *J Am Med Dir Assoc*. 2021 May;22(5):1107-13.e1.
13. Hajek A, König HH. What are the psychosocial consequences when fear of falling starts or ends? Evidence from an asymmetric fixed effects analysis based on longitudinal data from the general population. *Int J Geriatr Psychiatry*. 2020 Sep;35(9):1028-35.
14. Finn JM. The relationship between falls and fall-related efficacy, depression, and social resources: Adler School of Professional Psychology; 2001.
15. Nicholson Jr NR. The relationship between injurious falls, fear of falling, social isolation and depression. 2005.
16. Iliffe S, Kharicha K, Harari D, Swift C, Gillmann G, Stuck AE. Health risk appraisal in older people 2: the implications for clinicians and commissioners of social isolation risk in older people. *Br J Gen Pract*. 2007;57(537):277.

17. van Lankveld W, Fransen M, van den Hoogen F, den Broeder A. Age-related health hazards in old patients with first-time referral to a rheumatologist: a descriptive study. *Arthritis*. 2011;2011:823527.
18. Schnittger RI, Wherton J, Prendergast D, Lawlor BA. Risk factors and mediating pathways of loneliness and social support in community-dwelling older adults. *Aging Ment Health*. 2012;16(3):335-46.
19. Quach LT. Social Determinants of Falls: The Role of Social Support and Depression Among Community-Dwelling Older Adults. *Dissertation Abstracts International: Section B: The Sciences and Engineering 2018*; 78(8-B(E)):No Pagination Specified. 2016.
20. Hajek A, König HH. The association of falls with loneliness and social exclusion: evidence from the DEAS German Ageing Survey. *BMC Geriatr*. 2017 Sep 5;17(1):204.
21. Robins LM, Hill KD, Finch CF, Clemson L, Haines T. The association between physical activity and social isolation in community-dwelling older adults. *Aging Ment Health*. 2018 Feb;22(2):175-82.
22. Faria A, Martins M, Ribeiro O, Gomes BP, Fernandes C. Elderly residents in the community: gaining knowledge to support a rehabilitation nursing program. *Rev Bras Enferm*. 2020;73Suppl 3(Suppl 3):e20200194.
23. Vanden Wyngaert K, Van Craenenbroeck AH, Eloot S, Calders P, Celie B, Holvoet E, et al. Associations between the measures of physical function, risk of falls and the quality of life in haemodialysis patients: a cross-sectional study. *BMC Nephrol*. 2020 Jan 6;21(1):7.
24. Tinetti ME, Mendes de Leon CF, Doucette JT, Baker DI. Fear of falling and fall-related efficacy in relationship to functioning among community-living elders. *J Gerontol*. 1994 May;49(3):M140-7.
25. Howland J, Lachman ME, Peterson EW, Cote J, Kasten L, Jette A. Covariates of fear of falling and associated activity curtailment. *Gerontologist*. 1998 Oct;38(5):549-55.
26. Apikomkon H. Fear of falling and fall circumstances in Thailand: Curtin University; 2003.
27. Zijlstra GA, van Haastregt JC, van Eijk JT, van Rossum E, Stalenoef PA, Kempen GI. Prevalence and correlates of fear of falling, and associated avoidance of activity in the general population of community-living older people. *Age Ageing*. 2007 May;36(3):304-9.
28. Kara B, Yildirim Y, Genc A, Ekizler S. Assessment of home environment and life satisfaction in geriatrics and relation to fear of falling. *Turk J Physiother Rehabil*. 2009;20(3):190-200.
29. Mendes da Costa E, Pepersack T, Godin I, Bantuelle M, Petit B, Levêque A. Fear of falling and associated activity restriction in older people. results of a cross-sectional study conducted in a Belgian town. *Arch Public Health*. 2012 Jan 3;70(1):1.
30. Choi K, Ko Y. Characteristics Associated With Fear of Falling and Activity Restriction in South Korean Older Adults. *J Aging Health*. 2015 Sep;27(6):1066-83.
31. Ferreira FR, César CC, Andrade FB, Souza Junior PRB, Lima-Costa MF, Proietti FA. Aspects of social participation and neighborhood perception: ELSI-Brazil. *Rev Saude Publica*. 2018 Oct 25;52Suppl 2(Suppl 2):18s.
32. Petrinc AB, Crowe ML, Flanagan SK, Baker J. Health-related Quality of Life of Older Women Religious: Negative Influence of Frailty. *West J Nurs Res*. 2020 Dec;42(12):1088-96.
33. Ward-Griffin C, Hobson S, Melles P, Kloseck M, Vandervoort A, Crilly R. Falls and Fear of Falling among Community-Dwelling Seniors: The Dynamic Tension between Exercising Precaution and Striving for Independence. *Canadian Journal on Aging / La Revue canadienne du vieillissement*. 2004;23(4):307-18.



- 1  
2  
3 34. Meric MO, Fahriye. A qualitative study on perception of elderly about fear of falling and it's impact on daily life. Turkish Journal of  
4 Geriatrics. 2007;10(1):19-23.  
5 35. Schmid AA, Rittman M. Consequences of poststroke falls: activity limitation, increased dependence, and the development of fear of  
6 falling. Am J Occup Ther. 2009 May-Jun;63(3):310-6.  
7 36. Faes MC, Reelick MF, Joosten-Weyn Banningh LW, Gier M, Esselink RA, Olde Rikkert MG. Qualitative study on the impact of falling in frail  
8 older persons and family caregivers: foundations for an intervention to prevent falls. Aging Ment Health. 2010 Sep;14(7):834-42.  
9 37. Chiu MW-Y. Psychosocial responses to falling in older Chinese immigrants living in the community 2010.  
10 38. Høst D, Hendriksen C, Borup I. Older people's perception of and coping with falling, and their motivation for fall-prevention  
11 programmes. Scand J Public Health. 2011 Nov;39(7):742-8.  
12 39. Xu T, O'Loughlin K, Clemson L, Lannin NA, Dean C, Koh G. Developing a falls prevention program for community-dwelling stroke survivors  
13 in Singapore: client and caregiver perspectives. Disabil Rehabil. 2019 May;41(9):1044-54.  
14  
15  
16  
17  
18  
19  
20  
21  
22  
23  
24  
25  
26  
27  
28  
29  
30  
31  
32  
33  
34  
35  
36  
37  
38  
39  
40  
41  
42  
43  
44  
45  
46  
47



# BMJ Open

## Global evidence on falls and subsequent social isolation in older adults: A scoping review

|                                 |                                                                                                                                                                                                                                                                                                                                                                                                                                                                                                                                                                                                                                                                                                                                                                                                                                                                                                                                                                                                                                                                                                                                                                                                                                                                                                                                                                                                                                                                                                   |
|---------------------------------|---------------------------------------------------------------------------------------------------------------------------------------------------------------------------------------------------------------------------------------------------------------------------------------------------------------------------------------------------------------------------------------------------------------------------------------------------------------------------------------------------------------------------------------------------------------------------------------------------------------------------------------------------------------------------------------------------------------------------------------------------------------------------------------------------------------------------------------------------------------------------------------------------------------------------------------------------------------------------------------------------------------------------------------------------------------------------------------------------------------------------------------------------------------------------------------------------------------------------------------------------------------------------------------------------------------------------------------------------------------------------------------------------------------------------------------------------------------------------------------------------|
| Journal:                        | <i>BMJ Open</i>                                                                                                                                                                                                                                                                                                                                                                                                                                                                                                                                                                                                                                                                                                                                                                                                                                                                                                                                                                                                                                                                                                                                                                                                                                                                                                                                                                                                                                                                                   |
| Manuscript ID                   | bmjopen-2022-062124.R1                                                                                                                                                                                                                                                                                                                                                                                                                                                                                                                                                                                                                                                                                                                                                                                                                                                                                                                                                                                                                                                                                                                                                                                                                                                                                                                                                                                                                                                                            |
| Article Type:                   | Original research                                                                                                                                                                                                                                                                                                                                                                                                                                                                                                                                                                                                                                                                                                                                                                                                                                                                                                                                                                                                                                                                                                                                                                                                                                                                                                                                                                                                                                                                                 |
| Date Submitted by the Author:   | 05-Jul-2022                                                                                                                                                                                                                                                                                                                                                                                                                                                                                                                                                                                                                                                                                                                                                                                                                                                                                                                                                                                                                                                                                                                                                                                                                                                                                                                                                                                                                                                                                       |
| Complete List of Authors:       | <p>Thomas, Sonia; St Michael's Hospital Li Ka Shing Knowledge Institute, Knowledge Translation Program</p> <p>Parker, Amanda; St Michael's Hospital Li Ka Shing Knowledge Institute</p> <p>Fortune, Jennifer; RCSI University of Medicine and Health Sciences, Department of Public Health and Epidemiology</p> <p>Mitchell, Gary; Queen's University Belfast, School of Nursing and Midwifery</p> <p>Hezam, Areej; St Michael's Hospital Li Ka Shing Knowledge Institute</p> <p>Jiang, Ying; Public Health Agency of Canada, Centre for Surveillance and Applied Research</p> <p>Degroh, Margaret; Public Health Agency of Canada, Centre for Surveillance and Applied Research</p> <p>Anderson, Kerry; Public Health Agency of Canada, Centre for Health Promotion</p> <p>Gauthier-Beaupré, Amélie; Public Health Agency of Canada, Centre for Health Promotion; University of Ottawa, Faculty of Health Sciences</p> <p>Barker, Joan; St Michael's Hospital Li Ka Shing Knowledge Institute</p> <p>Watt, Jennifer; St Michael's Hospital Li Ka Shing Knowledge Institute; University of Toronto, Department of Geriatric Medicine</p> <p>Straus, Sharon; St Michael's Hospital Li Ka Shing Knowledge Institute; University of Toronto, Department of Geriatric Medicine</p> <p>Tricco, Andrea; St Michael's Hospital Li Ka Shing Knowledge Institute; University of Toronto Dalla Lana School of Public Health, Epidemiology Division and Institute for Health, Management, and Evaluation</p> |
| <b>Primary Subject Heading</b>: | Geriatric medicine                                                                                                                                                                                                                                                                                                                                                                                                                                                                                                                                                                                                                                                                                                                                                                                                                                                                                                                                                                                                                                                                                                                                                                                                                                                                                                                                                                                                                                                                                |
| Secondary Subject Heading:      | Mental health                                                                                                                                                                                                                                                                                                                                                                                                                                                                                                                                                                                                                                                                                                                                                                                                                                                                                                                                                                                                                                                                                                                                                                                                                                                                                                                                                                                                                                                                                     |
| Keywords:                       | REHABILITATION MEDICINE, GERIATRIC MEDICINE, PREVENTIVE MEDICINE                                                                                                                                                                                                                                                                                                                                                                                                                                                                                                                                                                                                                                                                                                                                                                                                                                                                                                                                                                                                                                                                                                                                                                                                                                                                                                                                                                                                                                  |
|                                 |                                                                                                                                                                                                                                                                                                                                                                                                                                                                                                                                                                                                                                                                                                                                                                                                                                                                                                                                                                                                                                                                                                                                                                                                                                                                                                                                                                                                                                                                                                   |

SCHOLARONE™  
Manuscripts



I, the Submitting Author has the right to grant and does grant on behalf of all authors of the Work (as defined in the below author licence), an exclusive licence and/or a non-exclusive licence for contributions from authors who are: i) UK Crown employees; ii) where BMJ has agreed a CC-BY licence shall apply, and/or iii) in accordance with the terms applicable for US Federal Government officers or employees acting as part of their official duties; on a worldwide, perpetual, irrevocable, royalty-free basis to BMJ Publishing Group Ltd ("BMJ") its licensees and where the relevant Journal is co-owned by BMJ to the co-owners of the Journal, to publish the Work in this journal and any other BMJ products and to exploit all rights, as set out in our [licence](#).

The Submitting Author accepts and understands that any supply made under these terms is made by BMJ to the Submitting Author unless you are acting as an employee on behalf of your employer or a postgraduate student of an affiliated institution which is paying any applicable article publishing charge ("APC") for Open Access articles. Where the Submitting Author wishes to make the Work available on an Open Access basis (and intends to pay the relevant APC), the terms of reuse of such Open Access shall be governed by a Creative Commons licence – details of these licences and which [Creative Commons](#) licence will apply to this Work are set out in our licence referred to above.

Other than as permitted in any relevant BMJ Author's Self Archiving Policies, I confirm this Work has not been accepted for publication elsewhere, is not being considered for publication elsewhere and does not duplicate material already published. I confirm all authors consent to publication of this Work and authorise the granting of this licence.

## Global evidence on falls and subsequent social isolation in older adults: A scoping review

1  
2  
3  
4  
5  
6  
7  
8 Sonia M. Thomas<sup>1</sup> email: [Sonia.Thomas@unityhealth.to](mailto:Sonia.Thomas@unityhealth.to)  
9  
10 Amanda Parker<sup>1</sup> email: [Amanda.Parker@unityhealth.to](mailto:Amanda.Parker@unityhealth.to)  
11  
12 Jennifer Fortune<sup>2</sup> email: [jenniferfortune@rcsi.ie](mailto:jenniferfortune@rcsi.ie)  
13  
14 Gary Mitchell<sup>3</sup> email: [Gary.Mitchell@qub.ac.uk](mailto:Gary.Mitchell@qub.ac.uk)  
15  
16 Areej Hezam<sup>1</sup> email: [Areej.Hezam@unityhealth.to](mailto:Areej.Hezam@unityhealth.to)  
17  
18 Ying Jiang<sup>4</sup> email: [ying.jiang@phac-aspc.gc.ca](mailto:ying.jiang@phac-aspc.gc.ca)  
19  
20 Margaret de Groh<sup>4</sup> email: [margaret.degroh@phac-aspc.gc.ca](mailto:margaret.degroh@phac-aspc.gc.ca)  
21  
22 Kerry Anderson<sup>5</sup> email: [kerry.anderson@phac-aspc.gc.ca](mailto:kerry.anderson@phac-aspc.gc.ca)  
23  
24 Amélie Gauthier-Beaupré<sup>5,6</sup> email: [amelie.gauthier-beaupre@phac-aspc.gc.ca](mailto:amelie.gauthier-beaupre@phac-aspc.gc.ca)  
25  
26 Joan Barker<sup>1</sup> email: [joanbarker@rogers.com](mailto:joanbarker@rogers.com)  
27  
28 Jennifer Watt<sup>1,7</sup> email: [Jennifer.Watt@unityhealth.to](mailto:Jennifer.Watt@unityhealth.to)  
29  
30 Sharon E. Straus<sup>1,7</sup> email: [Sharon.Straus@utoronto.ca](mailto:Sharon.Straus@utoronto.ca)  
31  
32 Andrea C. Tricco<sup>1,8\*</sup> email: [Andrea.Tricco@unityhealth.to](mailto:Andrea.Tricco@unityhealth.to)  
33  
34  
35  
36  
37

38 <sup>1</sup>Li Ka Shing Knowledge Institute, St. Michael's Hospital, 209 Victoria Street, East Building,  
39 Toronto, Ontario, M5B 1W8, Canada  
40

41  
42 <sup>2</sup>Department of Public Health and Epidemiology, RCSI University of Medicine and Health  
43 Sciences, Dublin, Ireland  
44

45  
46 <sup>3</sup>School of Nursing and Midwifery, Queen's University Belfast, Belfast, United Kingdom.  
47

48  
49 <sup>4</sup>Centre for Surveillance and Applied Research, Public Health Agency of Canada, Ottawa,  
50 Ontario, Canada  
51

52  
53 <sup>5</sup>Centre for Health Promotion, Public Health Agency of Canada, Ottawa, Ontario, Canada  
54  
55  
56  
57  
58  
59  
60

1  
2  
3 <sup>6</sup>Faculty of Health Sciences, University of Ottawa, Ottawa, Ontario, Canada  
4

5 <sup>7</sup>Department of Geriatric Medicine, University of Toronto, Toronto, Ontario, Canada  
6

7 <sup>8</sup>Epidemiology Division and Institute for Health, Management, and Evaluation, Dalla Lana  
8

9  
10 School of Public Health, University of Toronto, Toronto, Ontario, Canada  
11

12 **\*Corresponding Author:**  
13

14 Dr. Andrea C. Tricco, PhD, MSc  
15

16  
17 Scientist and Director of the Knowledge Synthesis Team,  
18

19 Knowledge Translation Program, Li Ka Shing Knowledge Institute, St. Michael's Hospital  
20

21 209 Victoria Street, East Building, Toronto, Ontario, M5B 1W8, Canada  
22

23  
24 Phone: (416) 864-6060 ext. 77521, Fax: (416) 864-6057, Email: [Andrea.Tricco@unityhealth.to](mailto:Andrea.Tricco@unityhealth.to)  
25  
26  
27  
28  
29  
30  
31  
32  
33  
34  
35  
36  
37  
38  
39  
40  
41  
42  
43  
44  
45  
46  
47  
48  
49  
50  
51  
52  
53  
54  
55  
56  
57  
58  
59  
60

## 1 ABSTRACT

2 **Background:** Falls are a leading cause of injury-related hospitalizations among adults aged 65  
3 years and older and may result in social isolation.

4 **Objective:** To summarize evidence on falls and subsequent social isolation and/or loneliness in  
5 older adults through a scoping review.

6 **Eligibility criteria:** Studies were eligible for inclusion if the population had a mean age of 60  
7 years or older, they examined falls and subsequent social isolation, loneliness, fear of falling or  
8 risk factors, and were primary studies (e.g., experimental, quasi-experimental, observational,  
9 qualitative).

10 **Sources of evidence:** MEDLINE, CINAHL, Embase, Ageline, and grey literature from  
11 inception until January 11, 2021.

12 **Charting methods:** A screening and charting form was developed and pilot-tested.  
13 Subsequently, two reviewers screened citations and full-text articles, and charted the evidence.

14 **Results:** After screening 4,993 citations and 304 full-text articles, 39 studies were included in  
15 this review. Participants had a history of falling (range: 11 to 100%). Most studies were  
16 conducted in Europe (44%) and North America (33%) and were of the cross-sectional study  
17 design (66.7%), in the community (79%). Studies utilized 15 different scales. Six studies  
18 examined risk factors for social isolation and activity restriction associated with fear of falling.  
19 Six studies reported mental health outcomes related to falls and subsequent social isolation.

20 **Conclusions:** Consistency in outcome measurement is recommended, as multiple outcomes were  
21 used across the included studies. Further research is warranted in this area, given the aging  
22 population and the importance of falls and social isolation to the health of older adults.

23 **Scoping Review Registration:** 10.17605/OSF.IO/2R8HM

1  
2  
3 24 **Word count:** 246/250 (abstract), 2981/3000 (main text)  
4

5 25 **Keywords:** scoping review, older adults, falling, social isolation, loneliness, fear of falling  
6  
7

8 26 **Strengths and Limitations of this Study:**  
9

- 10 27 • A robust methodology including a thorough and extensive literature search was used to  
11  
12 28 review the literature in the area.  
13  
14 29 • There was no date limits or language limits for studies eligible for inclusion in this  
15  
16 30 scoping review.  
17  
18 31 • Scoping reviews do not assess the quality of included studies and we cannot confirm the  
19  
20 32 directional causality between falls and social isolation.  
21  
22  
23  
24  
25  
26  
27  
28  
29  
30  
31  
32  
33  
34  
35  
36  
37  
38  
39  
40  
41  
42  
43  
44  
45  
46  
47  
48  
49  
50  
51  
52  
53  
54  
55  
56  
57  
58  
59  
60

## 33 INTRODUCTION

34 Addressing social isolation in older adults is a growing priority in Canada, as over 30% older  
35 adults are at risk of social isolation [1]. Social isolation among older adults is associated with  
36 adverse health outcomes including cognitive decline, depression, anxiety, and dementia [2].  
37 Globally, falls are the second leading cause of unintentional injury death, making falls a major  
38 public health concern [3]. In Canada, falls are the leading cause of injury-related hospitalizations  
39 among adults aged 65 years and older, and 20-30% of older adults experience at least one fall  
40 each year [4]. Falls may result in serious health-related consequences including physical (e.g.,  
41 fractures), physiological (e.g., cognitive decline), and psychological (e.g., anxiety, depressive  
42 symptoms, fear of falling, and social isolation) outcomes [5].

43         Given the detrimental outcomes associated with both falls and social isolation, there is a  
44 need to understand the relationship between falls and subsequent social isolation in older adults.  
45 The current scoping review is focused on falling and the subsequent experience of social  
46 isolation and/or loneliness and to ascertain whether the COVID-19 context affected the  
47 relationship between falls and subsequent social isolation.

## 48 METHODS

### 49 Protocol and registration

50 The protocol for this scoping review was developed in accordance with the JBI (formerly Joanna  
51 Briggs Institute) guidance for scoping reviews and registered with Open Science Framework [6].  
52 An integrated knowledge translation approach was used [7], whereby colleagues from the Public  
53 Health Agency of Canada (YJ, KA, MdG, AGB) co-developed the review. The results are  
54 reported using the Preferred Reporting Items for Systematic Reviews and Meta-analysis  
55 (PRISMA) extension to scoping reviews [8] supplemented by PRISMA 2020 [9].

## 56 Patient and Public Involvement

57 Through the Strategy for Patient-Oriented Research (SPOR) Evidence Alliance, we collaborated  
58 closely with a patient partner who provided feedback on our protocol, participated in full-text  
59 screening piloting, and provided input on the manuscript (JB).

## 60 Search strategy

61 An experienced librarian developed our comprehensive literature search strategy, which was  
62 peer-reviewed by a second information specialist using the Peer Review of Electronic Search  
63 Strategies (PRESS) checklist [10]. MEDLINE, CINAHL, Embase, and Ageline were searched  
64 from inception until January 11, 2021 (Appendix 1). References of included studies and relevant  
65 reviews were scanned. Grey literature (i.e., unpublished or difficult to locate studies) was  
66 searched using the Canadian Agency for Drugs and Technologies in Health's Grey Matters  
67 checklist [11].

## 68 Eligibility criteria

69 The population of interest were older adults with a mean age of 60 years or older. The concept  
70 was the relationship between falls and subsequent social isolation or loneliness. As mentioned in  
71 our related systematic review on interventions for social isolation after falling, social isolation  
72 and loneliness are distinct concepts [12]. Social isolation included a decrease in any of the  
73 following: number of social contacts, feeling of belonging, fulfilling relationships, engagement  
74 with others, and quality of their personal network [12]. We defined loneliness as "the unpleasant  
75 experience that occurs when a person's network of social relations is deficient in some way,  
76 either quantitatively or qualitatively" [13]. For our primary objective, the context included any  
77 community or institutional setting. For our secondary objective, we limited the context to include  
78 studies that specified their consideration of the COVID-19 pandemic. Studies including



1  
2  
3 79 participants reporting a history of falling (i.e., regardless of the proportion of the sample who  
4  
5 80 fell), the role of fear of falling in this relationship, as well as any risk (e.g. medication use,  
6  
7 81 frailty) or protective (e.g. exercise, gait or balance training) factors were considered eligible for  
8  
9 82 inclusion.

10  
11  
12 83 Eligible study designs included primary research studies of experimental (e.g.,  
13  
14 84 randomized controlled trials), quasi-experimental (e.g. non-randomized controlled trials,  
15  
16 85 controlled before and after studies, interrupted time series), observational (e.g., cohort studies,  
17  
18 86 case-control studies, cross-sectional studies), qualitative (phenomenological, ethnography,  
19  
20 87 qualitative interview, etc.) and mixed method (e.g., convergent parallel, embedded, explanatory  
21  
22 88 sequential) design. No restrictions based on study year, language of publication, or study  
23  
24 89 duration were applied.

#### 25 26 27 28 90 Study selection

29  
30  
31 91 A screening form was developed and a pilot-test using 50 citations was completed with 80%  
32  
33 92 agreement, and subsequently, all remaining titles and abstracts were screened independently by  
34  
35 93 pairs of reviewers (SMT, AP, JF, GM, AH). Discrepancies were resolved by a third reviewer.

36  
37 94 Similarly, two pilot-tests were completed for full-text article screening (achieving 27%  
38  
39 95 and 40% agreement, respectively), screening criteria were revised, and subsequently, full-text  
40  
41 96 articles were assigned to independent pairs of reviewers. Discrepancies were resolved by a third  
42  
43 97 reviewer.

#### 44 45 46 98 Data charting

47  
48  
49 99 A charting form was developed to capture data on study characteristics, population  
50  
51 100 characteristics and outcomes of interest. Relevant outcomes included any data illustrating the  
52  
53 101 relationship between falls and subsequent social isolation, including the role of fear of falling,  
54  
55  
56  
57  
58  
59  
60

102 and other risk factors or protective factors. A pilot-test was conducted using five studies,  
 103 sufficient agreement was achieved, and subsequently, full data charting was completed by  
 104 independent pairs of reviewers. Discrepancies were resolved by a third reviewer.

### 105 Analysis and presentation of results

106 The review findings were summarized descriptively using summary tables.

## 107 **RESULTS**

108 After screening 4993 citations and 304 full-text articles against our eligibility criteria, 39 studies  
 109 were identified as eligible for inclusion based on our primary objective for this review (Figure 1).

110 No studies were identified when limiting to the COVID-19 context for our secondary objective.

111 Study and patient characteristics have been summarized in Table 1 and detailed data are reported  
 112 in Appendices 2 and 3.

113 Table 1: Summary of study and patient characteristics

| Characteristics                     | Number (%)                 |
|-------------------------------------|----------------------------|
| <b>Study Characteristics (n=39)</b> |                            |
| <b>Geographical region</b>          |                            |
| Asia                                | 5 (12.8%)                  |
| Australia                           | 1 (2.5%)                   |
| Europe                              | 17 (43.6%)                 |
| North America                       | 13 (33.3%)                 |
| South America                       | 3 (7.7%)                   |
| <b>Study design</b>                 |                            |
| Cohort                              | 6 (13.8%)                  |
| Cross-sectional                     | 26 (66.7%)                 |
| Qualitative                         | 7 (19.4%)                  |
| <b>Study duration</b>               |                            |
| NA                                  | 29 (74.3%)                 |
| ≤ 1 year                            | 5 (12.8%)                  |
| ≥ 1 year                            | 5 (12.8%)                  |
| <b>Patient characteristics</b>      |                            |
| <b>Mean age</b>                     | 74.9 (range, 65.0 to 95.0) |
| NR                                  | 11 (28.2%)                 |
| 65.0-69.9 years                     | 4 (10.2%)                  |
| 70.0-74.9 years                     | 8 (20.5%)                  |
| 75.0-79.9 years                     | 14 (35.9%)                 |

|                                                                                |                                   |            |
|--------------------------------------------------------------------------------|-----------------------------------|------------|
|                                                                                | ≥80.0 years                       | 2 (5.1%)   |
| <b>Proportion of female participants</b>                                       | Mean: 65.3% (range, 42.5 to 88.9) |            |
| <b>Sample size</b>                                                             | Mean: 3043.6 (9 to 43487)         |            |
|                                                                                | <100                              | 11 (28.2%) |
|                                                                                | 100-499                           | 11 (28.2%) |
|                                                                                | 500-999                           | 3 (7.7%)   |
|                                                                                | 1000-1999                         | 4 (10.2%)  |
|                                                                                | 2000-5000                         | 4 (10.2%)  |
|                                                                                | >5000                             | 6 (15.4%)  |
| <b>Study setting</b>                                                           |                                   |            |
|                                                                                | Community                         | 31 (79.4%) |
|                                                                                | Medical                           | 6 (15.4%)  |
|                                                                                | Nursing home                      | 1 (2.5%)   |
|                                                                                | Multi-site                        | 1 (2.5%)   |
| <b>Participants living alone</b>                                               | 44.1% (range, 0 to 100)           |            |
| <b>Participants with a history of falling</b>                                  | Mean: 50.8% (range, 11.2 to 100)  |            |
|                                                                                | Not reported*                     | 11 (28.2%) |
|                                                                                | ≤25%                              | 6 (15.4%)  |
|                                                                                | 25-40%                            | 10 (25.6%) |
|                                                                                | 40-85%                            | 5 (12.8%)  |
|                                                                                | >85%                              | 7 (17.9%)  |
| <b>Abbreviations:</b> NA, not applicable; *not reported for the overall sample |                                   |            |

## 114 Study characteristics

115 The publication year for included studies ranged from 1987 to 2020, with more than half  
 116 published since 2010. Most studies were conducted in Europe (17/39, 44%) and North America  
 117 (13/39, 33%). More than half of the studies were cross-sectional study design (66.7%) and 7  
 118 qualitative studies were included. Most were conducted in the community (79%). Studies utilized  
 119 15 different scales and a variety of self reported responses to assess variables such as social  
 120 isolation, loneliness. (e.g., 18-item Lubben Social Network Scale, 6-item de Jong-Gierveld  
 121 Loneliness Scale). Six studies identified risk factors for social isolation and for activity  
 122 restriction due to fear of falling (Table 2). Six studies reported mental health outcomes  
 123 (Appendix 4).

124 Table 2: Potential risk factors for social isolation and activity restriction associated with fear of  
 125 falling

| Author, Year                                       | Risk factor                                | Associated evidence                                                                                                                                                          |
|----------------------------------------------------|--------------------------------------------|------------------------------------------------------------------------------------------------------------------------------------------------------------------------------|
| <b>Social Isolation after injurious fall</b>       |                                            |                                                                                                                                                                              |
| Nicholson, 2005                                    | Sex (female)                               | The authors noted a strong positive correlation between injurious falls and social isolation for women ( $\rho = -0.5$ ; $p = 0.01$ ), but this was not significant for men. |
| <b>Activity Restriction due to fear of falling</b> |                                            |                                                                                                                                                                              |
| Zijlstra, 2007                                     | Aged 80 years or older                     | OR: 1.56 (95% CI, 1.24-1.95)                                                                                                                                                 |
|                                                    | Fair perceived general health              | OR: 2.92 (95% CI, 2.43-3.52)                                                                                                                                                 |
|                                                    | Poor perceived general health              | OR: 5.7 (95% CI, 3.57-9.12)                                                                                                                                                  |
| Curcio, 2009                                       | Poor perceived health                      | OR: 1.38 (95% CI, 1.06-1.79)                                                                                                                                                 |
|                                                    | Depression                                 | OR: 1.76 (95% CI, 1.38-2.24)                                                                                                                                                 |
|                                                    | Low social participation                   | OR: 1.52 (95% CI, 1.20-1.92)                                                                                                                                                 |
|                                                    | Difficulties in activities of daily living | OR: 1.65 (95% CI, 1.16-2.32)                                                                                                                                                 |
|                                                    | Decreased physical activity                | OR: 1.35 (95% CI, 1.06-1.70)                                                                                                                                                 |
|                                                    | Polypharmacy                               | OR: 1.56 (95% CI, 1.14-2.14)                                                                                                                                                 |
| Dias, 2011                                         | Below poverty level                        | OR: 1.32 (95% CI, 1.05-1.65)                                                                                                                                                 |
|                                                    | Depression                                 | Chi-square=15.2, $p = 0.004$                                                                                                                                                 |
|                                                    | Exhaustion (frailty)                       | Chi-square=9.2, $p = 0.01$                                                                                                                                                   |
| Murphy, 2002                                       | Participation in social activities         | Chi-square=10.4, $p = 0.016$                                                                                                                                                 |
|                                                    | Two or more chronic conditions             | ARR: 1.34 (95% CI, 1.08-1.65)                                                                                                                                                |
|                                                    | Slow-timed physical performance            | ARR: 1.44 (95% CI, 1.18-1.75)                                                                                                                                                |
| Merchant, 2020                                     | Sarcopenia                                 | OR, 8.13 (95% CI, 1.52-43.41)                                                                                                                                                |

126 Abbreviations: OR, odds ratio; ARR, adjusted risk ratio

### 127 Patient characteristics

128 Across all studies, the number of included patients was 118,702, with an average of 3,043

129 patients per study. Their mean age ranged from 65 to 95 years. Approximately 65% of patients

1  
2  
3 130 were female. Most studies included participants with a history of falling, ranging from 11% to  
4  
5 131 100% of the study population.

7  
8 132 Cohort studies

9  
10 133 Among the 39 included studies, six were cohort studies (Appendix 5). Tinetti et al (1998)  
11  
12 134 demonstrated a significant relationship between multiple non-injurious falls and a decline in  
13  
14 135 social functioning (Regression coefficient = -0.538 ( $p < 0.05$ )), measured using the Social Activity  
15  
16 136 scale, in a sample of 770 older adults after 3 years of follow-up [14]. Similarly, Pin et al. (2016)  
17  
18 137 found that in their cohort of 16,583 participants, those who fell showed decreased social  
19  
20 138 participation after falling ( $p < 0.001$ ), which was no longer statistically significant when frailty  
21  
22 139 was added in the model [15].

23  
24  
25  
26 140 Vellas et al. (1987) compared people who fall versus those who did not in two  
27  
28 141 populations: a retirement home ( $n=118$ ) and older adults living at home ( $n=60$ ) [16]. Among the  
29  
30 142 older adults who lived at home, they noted that fewer fallers were able to maintain the same level  
31  
32 143 of activity after 6 months of follow-up when compared to non-fallers ( $p < 0.02$ ).

33  
34  
35 144 Van der Meulen et al. (2014) assessed social participation (using the Frenchay Activities  
36  
37 145 Index) in 260 older adults with low and high levels of concern about falling over 14-months [17].  
38  
39 146 They reported significant differences (specific results not reported) between the groups, with  
40  
41 147 lower social participation scores in those who had a higher level of concern about falling.

42  
43  
44 148 In 4,680 older adults, Yu et al. (2021) reported a significant relationship between the  
45  
46 149 number of falls and loneliness scores (measured using the 3 item University of California, Los  
47  
48 150 Angeles (UCLA) Loneliness Scale) across three time points over 4-years ( $B = 0.008$ ,  $p < 0.05$ )  
49  
50 151 [18]. A cohort study by Hajek et al. (2020) looked at loneliness (as measured using the Bude and  
51  
52 152 Lantermann scale) and social isolation (measured using the De Jong Gierveld Loneliness Scale)

1  
2  
3 153 and their link to fear of falling 669 older adults [19]. They compared older adults with an onset  
4  
5 154 of fear of falling, to those who had no fear. Their findings revealed that the end of fear of falling  
6  
7  
8 155 was associated with lower loneliness scores ( $\beta = -0.06$ ,  $p < 0.05$ ) and other negative psychosocial  
9  
10 156 outcomes (e.g., increased depressive symptoms).

### 12 157 Cross-sectional studies related to falls and social isolation

14  
15 158 Of the twenty-six cross-sectional studies included in this review, 11 reported on the relationship  
16  
17 159 between falls and social isolation or loneliness (Appendix 6).

19 160 Quach et al. (2016) examined the relationship between falls and scores on the Social  
20  
21 161 Relationship Index including 8,464 participants [20]. They noted that participants who reported  
22  
23 162 experiencing a fall or multiple falls had a lower social relationship index score (mean, 3.24 and  
24  
25 163 3.08 respectively) compared to those who had not fallen (mean, 3.34;  $p < 0.0001$ ).

28 164 Hajek et al (2017) examined variables associated with a history of falling in 7,808  
29  
30 165 participants [21]. They found those reporting a fall in the previous 12 months had higher  
31  
32 166 loneliness scores (De Jong Gierveld Loneliness Scale;  $\beta = .08$ ,  $p < .001$ ) and social exclusion  
33  
34 167 scores (Bude and Lantermann scale;  $\beta = .08$ ,  $p < .001$ ) compared to those who had not fallen.

37 168 Schnittger et al. (2012) conducted a study in 579 older adults identifying risk factors for  
38  
39 169 different pathways of loneliness – emotional loneliness, social loneliness (both measured using  
40  
41 170 the De Jong Gierveld Loneliness Scale), and social support (measured using the Lubben Social  
42  
43 171 Network Scale) [22]. A history of falls was the only biological variable that was identified as a  
44  
45 172 statistically significant risk factor for inclusion in the model for social support (correlation  
46  
47 173 coefficient= -0.247;  $p < 0.003$ ).

51 174 Stel et al (2004) reported a statistically significant decline in social activities in 204 older  
52  
53 175 adults who experienced a fall inside their home (OR: 2.6 (95% CI: 1.1-6.5);  $p < 0.05$ ) [23], and

1  
2  
3 176 Vanden Wyngaert et al. (2020) reported an association between risk of falls and participation in  
4  
5 177 social roles and activities in 154 older adult haemodialysis patients (PROMIS questionnaire;  
6  
7  
8 178  $R^2=0.11$ ;  $p=0.01$ ) [24]. Finally, Nicholson et al. (2005) reported a strong positive relationship  
9  
10 179 between experiencing an injurious fall and increasing social isolation in a sample of 68 older  
11  
12 180 adults (Lubben Social Network Scale;  $p= -0.4$ ;  $p<0.05$ ), and highlighted that this relationship  
13  
14 181 was stronger in women ( $p= -0.5$ ;  $p=0.01$ ) [25]. Additionally, they assessed this relationship using  
15  
16 182 both the Family and Friends subscales of the Lubben Social Network Scale and found that the  
17  
18 183 correlation was specific to the Friends subscale ( $p= -0.43$ ;  $p<0.05$ ).

19  
20 184 Iffle et al. (2007) and Robins et al. (2018) found no statistically significant associations  
21  
22 185 between falls and social isolation using the Lubben Social Network Scale in a sample of 3,139  
23  
24 186 older adults and the Friendship Scale for social isolation in a sample of 245 older adults,  
25  
26 187 respectively [26, 27]. Similarly, Van Lankveld et al. (2011) and Faria et al. (2020) found no  
27  
28 188 correlation between falls and loneliness, using the De Jong Gierveld Loneliness scale in a sample  
29  
30 189 of 579 older adults, and the UCLA scale in a sample of 48 older adults, respectively [28, 29].  
31  
32 190 Additionally, Finn et al. (2001) noted no difference in scores for the OARS social support scale  
33  
34 191 when comparing fallers to non-fallers in a nursing home setting ( $n=49$ ) [30].

#### 192 Cross-sectional studies related to fear of falling and social isolation

193 Seven studies examined fear of falling linked to falls and social isolation (Appendix 7). Gagnon  
194 et al. (2005) reported a statistically significant positive relationship between fear of falling and  
195 social support in a sample of 105 older adults (measured using the confiding-relationships  
196 component of the Bedford Life Events and Difficulties Schedule modified for elderly subjects;  
197 Wald chi-square= 3.77;  $p=0.05$ ) [31]. Curcio et al. (2009) reported a strong relationship between  
198 fear of falling and low social participation in 1,668 older adults (OR, 1.52; 95% CI, 1.20-1.92;

199 p<0.01) [32]. Petrinec et al. (2020) identified fear of falling as an independent predictor of social  
200 functioning (as measured by the Medical Outcomes Study 36-item Short-Form General Health  
201 Survey;  $\beta = -0.29$ ) in 108 older adults [33].

202 Merchant et al. (2020) and Iliffe et al. (2007) showed no statistically significant  
203 relationship between fear of falling and social isolation in 493 older adults and 3,139 older  
204 adults, respectively [26, 34]. Ferreira et al. (2018) and Kara et al. (2009) showed no association  
205 between fear of falling and social participation (n= 7,935) or fear of falling and loneliness  
206 (n=47), respectively [35, 36].

#### 207 Cross-sectional studies related to falls and activity restriction due to fear of falling

208 Eight studies examined the relationship between falls and activity restriction due to fear of  
209 falling (Appendix 7). Tinetti et al (1994) and Apikomkon et al. (2003) both reported a  
210 statistically significant decrease in activity due to fear of falling in individuals who experienced a  
211 fall compared to those who had not (n=1,103, chi-square= 13.1, p < 0.001; and n=546, chi-  
212 square=5.49, p<0.05, respectively) [37, 38]. Similarly, in 1,668 older adults, Curcio et al. (2009)  
213 demonstrated that those who restricted activity due to fear of falling were more likely to have  
214 experienced a fall in the year prior (OR: 1.48 (95%CI, 1.18-1.86); p=0.001) [32], and Mendes da  
215 Costa et al. (2012) demonstrated that activity restriction increased in those with multiple falls  
216 over the past year (OR, 3.04; 95% CI, 1.70-5.42) [39]. Murphy et al. (2002) , and Choi et al.  
217 (2015) showed that a history of injurious falls was independently associated with activity  
218 restriction due to fear of falling (n=1,064, ARR: 1.36; 95% CI, 1.11-1.66; p=0.003; and n=4,247,  
219 OR, 3.03; 95% CI, 1.21-7.54, p=0.008, respectively) [40, 41].

220 Howland et al. (1998) reported no relationship between the experience of a fall and  
221 activity restriction in a sample of 266 older adults (OR: 1.094; 95% CI, 0.376-3.177; p=0.869)



1  
2  
3 222 [42], as did Choi et al. (2015) (OR, 2.12; 95% CI, 0.96-4.67; p=0.062) among 4,247 older adults  
4  
5 223 [41]. Similarly, Merchant et al. (2020) also reported no significant relationship between the  
6  
7 224 number of falls and fear-based activity restriction in 493 older adults (OR, 1.4; 95% CI, 0.94–  
8  
9 225 2.20) [34].

## 12 226 Qualitative studies

14 227 Seven qualitative studies were included (Appendix 8). All participants interviewed were older  
15  
16 228 adults (n=124), including 51 stroke survivors [43, 44] and 10 experiencing frailty [45]. Common  
17  
18 229 categories identified across these studies were activity restriction to manage fear of falling,  
19  
20 230 changing behaviours to avoid falling [43, 45-47], feeling restricted due to reduced mobility after  
21  
22 231 falling [43, 44, 48], increasing dependence on caregivers [43, 45], developing fear of falling [43,  
23  
24 232 45], feelings of loneliness or isolation [43, 48], and a negative impact on identity or autonomy  
25  
26 233 [47].

## 30 234 **DISCUSSION**

32 235 We conducted a comprehensive scoping review including 39 studies examining the relationship  
33  
34 236 between falls and subsequent social isolation. We limited the scoping review to studies that  
35  
36 237 identified social isolation after a fall, this was due to the request of the commissioning  
37  
38 238 knowledge user. More than half of the studies were published since 2010, suggesting increased  
39  
40 239 interest in the relationship between falls and social isolation in older adults. Social isolation and  
41  
42 240 loneliness were measured using a variety of outcome measures across studies, such as degree of  
43  
44 241 activity, and varying scales for loneliness, social isolation, social participation, social support,  
45  
46 242 etc. This highlights the growing need for consistency in the measurement of social isolation and  
47  
48 243 loneliness to allow for meaningful comparison across studies. Cornwall et al. (2009) highlight  
49  
50 244 previous efforts to consolidate different measures of social isolation and build off this work.  
51  
52  
53  
54  
55  
56  
57  
58  
59  
60

1  
2  
3 245 They combined multiple measures of social isolation to develop two scales that measure distinct  
4  
5 246 dimensions of social isolation – social disconnectedness and perceived isolation [49].  
6

7  
8 247 Only a few studies examined risk factors and mental health outcomes related to falls and  
9  
10 248 subsequent social isolation. Risk factors linked to social isolation and activity restriction  
11  
12 249 included age, sex/gender, poor perceived health, poverty, frailty, and comorbidity. Few studies  
13  
14 250 also documented an association between activity restriction due to fear of falling and depression.  
15  
16  
17 251 Our findings suggest the presence of gaps in the literature for these important outcomes,  
18  
19 252 highlighting the need for further research. No randomized trials exploring interventions for social  
20  
21 253 isolation after a fall were identified in our scoping review, highlighting another gap in the  
22  
23 254 literature and an area for future research to explore.  
24  
25

26 255 We did not identify any studies on falls and subsequent social isolation that were specific  
27  
28 256 to the COVID-19 context, highlighting another gap in the evidence base. A scoping review by  
29  
30 257 Kasar et al. (2021) suggests that older adults face increased social isolation as a result of  
31  
32 258 pandemic-related restrictions, which can result in increased loneliness and reduced quality of life  
33  
34 259 [50]. They also highlighted how technology can be used to deliver virtual or tele-health support  
35  
36 260 services, and to allow older adults stay connected with their social networks [50]. A systematic  
37  
38 261 review by Larson et al. (2021) assessed the impact of COVID-19 lockdowns on physical activity  
39  
40 262 in older adults and reported that most studies demonstrated a decline in physical activity or an  
41  
42 263 increase in sedentary behaviours in this population. The effectiveness of physical activity and  
43  
44 264 exercise in preventing falls and fractures in older adults is well-established in the literature [51-  
45  
46 265 53]. A decline in physical activity in older adults could lead to sarcopenia, and an increased risk  
47  
48  
49 266 of falls or fractures [53].  
50  
51  
52  
53  
54  
55  
56  
57  
58  
59  
60

1  
2  
3 267           There are several strengths to our scoping review, such as the use of the JBI guide, and  
4  
5 268   the PRISMA-ScR. A comprehensive literature search was conducted and several different types  
6  
7  
8 269   of study designs were included. However, limitations include that all studies were conducted in  
9  
10 270   middle-high- or high-income economy countries. This suggests that our results may not be  
11  
12 271   generalizable to low- and middle-income countries, highlighting a gap in the literature. Many of  
13  
14 272   the included studies were cross-sectional and we cannot confirm the directional causality  
15  
16  
17 273   between falls and social isolation without more robust research.

18  
19 274           In summary, we found a dearth of research, particularly examining risk factors and  
20  
21 275   mental health outcomes related to social isolation and falling older adults. Further research is  
22  
23  
24 276   warranted in this area, given the importance of falls and social isolation to the health of older  
25  
26 277   adults.  
27  
28  
29  
30  
31  
32  
33  
34  
35  
36  
37  
38  
39  
40  
41  
42  
43  
44  
45  
46  
47  
48  
49  
50  
51  
52  
53  
54  
55  
56  
57  
58  
59  
60

1  
2  
3 278 **LIST OF ABBREVIATIONS**  
4

5 279 ARR Absolute Risk Reduction  
6

7  
8 280 CADTH Canadian Agency for Drugs and Technologies in Health  
9

10 281 CI Confidence interval  
11

12 282 OR Odds Ratio  
13

14  
15 283 PRESS Peer Review of Electronic Search Strategies  
16

17 284 PRISMA Preferred Reporting Items for Systematic Reviews and Meta-Analyses  
18  
19  
20

21 285 **DECLARATIONS**  
22

23  
24 286 Funding  
25

26 287 This project was commissioned and funded by the Public Health Agency of Canada  
27

28 288 [4500415303] through the query services of the SPOR Evidence Alliance. The SPOR Evidence  
29

30  
31 289 Alliance is supported by the Canadian Institutes of Health Research (CIHR) under Canada's  
32

33 290 Strategy for Patient-Oriented Research (SPOR) initiative, and the generosity of partners from 41  
34

35 291 public agencies and organizations across Canada who have made cash or in-kind contributions.  
36

37 292 Dr. Tricco is funded by a Tier 2 Canada Research Chair in Knowledge Synthesis [17-0126-  
38

39 293 AWA], and Dr. Straus is funded by a Tier 1 Canada Research Chair in Knowledge Translation  
40

41  
42 294 [17-0245-SUB].  
43

44 295 Ethics approval  
45

46 296 Not required.  
47  
48

49 297 Consent for publication  
50

51 298 Not applicable.  
52  
53

54 299 Availability of data and materials  
55  
56  
57  
58  
59  
60

1  
2  
3 300 The full dataset is available from the corresponding author upon reasonable request.  
4

5 301 Conflict of interests  
6

7  
8 302 All authors do not have any potential (or perceived) conflicts of interest.  
9

10 303 Author Contribution  
11

12 304 ACT obtained funding for this study. SMT, ACT, YJ, MdG, and KA conceptualized the study.  
13

14 305 SMT drafted the protocol, with input from ACT, YJ, MdG, KA, JB, JW, and SES. SMT oversaw  
15

16 306 screening, full-text review, and data abstraction. SMT, AP, JF, GM, AH, and JB screened  
17

18 307 citations and full text articles, abstracted and verified data. SMT and ACT interpreted results,  
19

20 308 and SMT, AP, and ACT drafted the manuscript and revised the final version of the manuscript.  
21

22 309 JF, GM, AH, YJ, MdG, KA, AGB, JB, JW, and SES critically reviewed the manuscript. All  
23

24 310 authors approved of the final version.  
25

26 311 Role of the funder  
27

28 312 The funders were co-developers of this research project and contributed to the design of the  
29

30 313 study and reviewed/approved of the manuscript.  
31

32 314 Acknowledgements  
33

34 315 We thank Alissa Epworth for running the searches, de-duplicating results and obtaining full-text  
35

36 316 articles. We also thank Katrina Chiu and Faryal Khan for their support with formatting the  
37

38 317 manuscript and creating tables and appendices.  
39  
40  
41  
42  
43  
44  
45  
46

47 318 **SUPPLEMENTAL FILES**  
48

49 319 Supplemental File 1: PRISMA Checklist  
50

51 320 Supplemental File 2: Appendices  
52  
53  
54  
55  
56  
57  
58  
59  
60

## REFERENCES

1. Keefe J, Andrew M, Fancey P, Hall M. A profile of social isolation in Canada. Report submitted to the F/P/T Working Group on Social Isolation Province of British Columbia and Mount Saint Vincent University. 2006.
2. Government of Canada. Report on the Social Isolation of Seniors. 2016, July 20.
3. World Health Organization. Falls. 2021, April 26; Available from: <https://www.who.int/news-room/fact-sheets/detail/falls>.
4. Public Health Agency of Canada. Seniors' Falls in Canada: Second Report. 2014.
5. Terroso M, Rosa N, Marques AT, Simoes R. Physical consequences of falls in the elderly: a literature review from 1995 to 2010. *Eur Rev Aging Phys Act*. 2014;11(1):51-9.
6. Tricco A, Thomas SM, Ramkissoon N, Mitchell G, Fortune J, Watt J, et al. Falls and social isolation in older adults. 2021; Available from: <https://osf.io/2r8hm>.
7. Kothari A, McCutcheon C, Graham ID. Defining integrated knowledge translation and moving forward: a response to recent commentaries. *Int J Health Policy Manag*. 2017;6(5):299.
8. Tricco AC, Lillie E, Zarin W, O'Brien KK, Colquhoun H, Levac D, et al. PRISMA extension for scoping reviews (PRISMA-ScR): checklist and explanation. *Ann Intern Med*. 2018;169(7):467-73.
9. Page MJ, McKenzie JE, Bossuyt PM, Boutron I, Hoffmann TC, Mulrow CD, et al. The PRISMA 2020 statement: an updated guideline for reporting systematic reviews. *BMJ*. 2021;372.
10. McGowan J, Sampson M, Salzwedel DM, Cogo E, Foerster V, Lefebvre C. PRESS peer review of electronic search strategies: 2015 guideline statement. *J Clin Epidemiol*. 2016;75:40-6.
11. Canadian Agency for Drugs Technologies in Health. Grey Matters: a practical tool for searching health-related grey literature (Internet). 2018.
12. Tricco A, Thomas SM, Radhakrishnan A, Ramkissoon N, Mitchell G, Fortune J, et al. Interventions for social isolation in older adults who have experienced a fall: A systematic review. *BMJ Open*. 2022; 12(4):e056540.
13. Perlman D, Peplau LA. Toward a social psychology of loneliness. *Pers Relationsh*. 1981;3:31-56.
14. Tinetti ME, Williams CS. The effect of falls and fall injuries on functioning in community-dwelling older persons. *J Gerontol A Biol Sci Med Sci*. 1998;53(2):M112-9.
15. Pin S, Spini D. Impact of falling on social participation and social support trajectories in a middle-aged and elderly European sample. *SSM Popul Health*. 2016;2:382-9.
16. Vellas B, Cayla F, Bocquet H, de Pemille F, Albarede JL. Prospective study of restriction of activity in old people after falls. *Age Ageing*. 1987;16(3):189-93.
17. van der Meulen E, Zijlstra GA, Ambergen T, Kempen GI. Effect of fall-related concerns on physical, mental, and social function in community-dwelling older adults: a prospective cohort study. *J Am Geriatr Soc*. 2014;62(12):2333-8.
18. Yu K, Wu S, Jang Y, Chou CP, Wilber KH, Aranda MP, et al. Longitudinal Assessment of the Relationships Between Geriatric Conditions and Loneliness. *J Am Med Dir Assoc*. 2021;22(5):1107-13.e1.

- 1  
2  
3 364 19. Hajek A, König HH. What are the psychosocial consequences when fear of falling starts  
4 365 or ends? Evidence from an asymmetric fixed effects analysis based on longitudinal data  
5 366 from the general population. *Int J Geriatr Psychiatry*. 2020;35(9):1028-35.
- 6 367 20. Quach LT. Social Determinants of Falls: The Role of Social Support and Depression  
7 368 Among Community-Dwelling Older Adults. *Dissertation Abstracts International: Section*  
8 369 *B: The Sciences and Engineering* 2018; 78(8-B(E)):No Pagination Specified. 2016.
- 9 370 21. Hajek A, König HH. The association of falls with loneliness and social exclusion:  
10 371 evidence from the DEAS German Ageing Survey. *BMC Geriatr*. 2017;17(1):204.
- 11 372 22. Schnittger RI, Wherton J, Prendergast D, Lawlor BA. Risk factors and mediating  
12 373 pathways of loneliness and social support in community-dwelling older adults. *Aging*  
13 374 *Ment Health*. 2012;16(3):335-46.
- 14 375 23. Stel VS, Smit JH, Pluijm SM, Lips P. Consequences of falling in older men and women  
15 376 and risk factors for health service use and functional decline. *Age Ageing*. 2004;33(1):58-  
16 377 65.
- 17 378 24. Vanden Wyngaert K, Van Craenenbroeck AH, Eloot S, Calders P, Celie B, Holvoet E, et  
18 379 al. Associations between the measures of physical function, risk of falls and the quality of  
19 380 life in haemodialysis patients: a cross-sectional study. *BMC Nephrol*. 2020;21(1):7.
- 20 381 25. Nicholson Jr NR. The relationship between injurious falls, fear of falling, social isolation  
21 382 and depression. 2005.
- 22 383 26. Iliffe S, Kharicha K, Harari D, Swift C, Gillmann G, Stuck AE. Health risk appraisal in  
23 384 older people 2: the implications for clinicians and commissioners of social isolation risk  
24 385 in older people. *Br J Gen Pract*. 2007;57(537):277.
- 25 386 27. Robins LM, Hill KD, Finch CF, Clemson L, Haines T. The association between physical  
26 387 activity and social isolation in community-dwelling older adults. *Aging Ment Health*.  
27 388 2018;22(2):175-82.
- 28 389 28. van Lankveld W, Fransen M, van den Hoogen F, den Broeder A. Age-related health  
29 390 hazards in old patients with first-time referral to a rheumatologist: a descriptive study.  
30 391 *Arthritis*. 2011;2011:823527.
- 31 392 29. Faria A, Martins M, Ribeiro O, Gomes BP, Fernandes C. Elderly residents in the  
32 393 community: gaining knowledge to support a rehabilitation nursing program. *Rev Bras*  
33 394 *Enferm*. 2020;73Suppl 3(Suppl 3):e20200194.
- 34 395 30. Finn JM. The relationship between falls and fall-related efficacy, depression, and social  
35 396 resources: *Adler School of Professional Psychology*; 2001.
- 36 397 31. Gagnon N, Flint AJ, Naglie G, Devins GM. Affective correlates of fear of falling in  
37 398 elderly persons. *Am J Geriatr Psychiatry*. 2005;13(1):7-14.
- 38 399 32. Curcio CL, Gomez F, Reyes-Ortiz CA. Activity restriction related to fear of falling  
39 400 among older people in the Colombian Andes mountains: are functional or psychosocial  
40 401 risk factors more important? *J Aging Health*. 2009;21(3):460-79.
- 41 402 33. Petrinc AB, Crowe ML, Flanagan SK, Baker J. Health-related Quality of Life of Older  
42 403 Women Religious: Negative Influence of Frailty. *West J Nurs Res*. 2020;42(12):1088-96.
- 43 404 34. Merchant RA, Chen MZ, Wong BLL, Ng SE, Shirooka H, Lim JY, et al. Relationship  
44 405 Between Fear of Falling, Fear-Related Activity Restriction, Frailty, and Sarcopenia. *J Am*  
45 406 *Geriatr Soc*. 2020;68(11):2602-8.
- 46 407 35. Ferreira FR, César CC, Andrade FB, Souza Junior PRB, Lima-Costa MF, Proietti FA.  
47 408 Aspects of social participation and neighborhood perception: ELSI-Brazil. *Rev Saude*  
48 409 *Publica*. 2018;52Suppl 2(Suppl 2):18s.



- 1  
2  
3 410 36. Kara B, Yildirim Y, Genc A, Ekizler S. Assessment of home environment and life  
4 411 satisfaction in geriatrics and relation to fear of falling. *Turk J Physiother Rehabil.*  
5 412 2009;20(3):190-200.  
6  
7 413 37. Tinetti ME, Mendes de Leon CF, Doucette JT, Baker DI. Fear of falling and fall-related  
8 414 efficacy in relationship to functioning among community-living elders. *J Gerontol.*  
9 415 1994;49(3):M140-7.  
10 416 38. Apikommonkon H. Fear of falling and fall circumstances in Thailand: Curtin University;  
11 417 2003.  
12 418 39. Mendes da Costa E, Peppersack T, Godin I, Bantuelle M, Petit B, Levêque A. Fear of  
13 419 falling and associated activity restriction in older people. results of a cross-sectional study  
14 420 conducted in a Belgian town. *Arch Public Health.* 2012;70(1):1.  
15  
16 421 40. Murphy SL, Williams CS, Gill TM. Characteristics associated with fear of falling and  
17 422 activity restriction in community-living older persons. *J Am Geriatr Soc.* 2002;50(3):516-  
18 423 20.  
19 424 41. Choi K, Ko Y. Characteristics Associated With Fear of Falling and Activity Restriction in  
20 425 South Korean Older Adults. *J Aging Health.* 2015;27(6):1066-83.  
21 426 42. Howland J, Lachman ME, Peterson EW, Cote J, Kasten L, Jette A. Covariates of fear of  
22 427 falling and associated activity curtailment. *Gerontologist.* 1998;38(5):549-55.  
23 428 43. Schmid AA, Rittman M. Consequences of poststroke falls: activity limitation, increased  
24 429 dependence, and the development of fear of falling. *Am J Occup Ther.* 2009;63(3):310-6.  
25  
26 430 44. Xu T, O'Loughlin K, Clemson L, Lannin NA, Dean C, Koh G. Developing a falls  
27 431 prevention program for community-dwelling stroke survivors in Singapore: client and  
28 432 caregiver perspectives. *Disabil Rehabil.* 2019;41(9):1044-54.  
29  
30 433 45. Faes MC, Reelick MF, Joosten-Weyn Banningh LW, Gier Md, Esselink RA, Olde  
31 434 Rikkert MG. Qualitative study on the impact of falling in frail older persons and family  
32 435 caregivers: foundations for an intervention to prevent falls. *Aging Ment Health.*  
33 436 2010;14(7):834-42.  
34 437 46. Meltem M, Oflaz, Ç Fahriye. A Qualitative Study on the Perception of Elderly about fear  
35 438 of falling and it's impact on daily life. *Turk Geriatri Derg.* 2007;10(1):19-23.  
36  
37 439 47. Høst D, Hendriksen C, Borup I. Older people's perception of and coping with falling, and  
38 440 their motivation for fall-prevention programmes. *Scand J Public Health.* 2011;39(7):742-  
39 441 8.  
40 442 48. Chiu MW-Y. Psychosocial responses to falling in older Chinese immigrants living in the  
41 443 community [Doctoral Dissertation]. 2010.  
42 444 49. Cornwell EY, Waite LJ. Measuring social isolation among older adults using multiple  
43 445 indicators from the NSHAP study. *J Gerontol B: Psychol Sci Soc Sci.*  
44 446 2009;64(suppl\_1):i38-i46.  
45  
46 447 50. Kasar KS, Karaman E. Life in lockdown: Social isolation, loneliness and quality of life in  
47 448 the elderly during the COVID-19 pandemic: A scoping review. *Geriatr Nurs.*  
48 449 2021;42(5):1222-9.  
49 450 51. Tricco AC, Thomas SM, Veroniki AA, Hamid JS, Cogo E, Strifler L, et al. Comparisons  
50 451 of interventions for preventing falls in older adults: a systematic review and meta-  
51 452 analysis. *JAMA.* 2017;318(17):1687-99.  
52  
53 453 52. Langhammer B, Bergland A, Rydwik E. The importance of physical activity exercise  
54 454 among older people. *BioMed Res;* 2018.



- 1  
2  
3 455 53. Larson EA, Bader-Larsen KS, Magkos F. The effect of COVID-19-related lockdowns on  
4 456 diet and physical activity in older adults: A systematic review. *Aging Dis.*  
5 457 2021;12(8):1935.  
6  
7  
8  
9  
10  
11  
12  
13  
14  
15  
16  
17  
18  
19  
20  
21  
22  
23  
24  
25  
26  
27  
28  
29  
30  
31  
32  
33  
34  
35  
36  
37  
38  
39  
40  
41  
42  
43  
44  
45  
46  
47  
48  
49  
50  
51  
52  
53  
54  
55  
56  
57  
58  
59  
60

For peer review only

1  
2  
3  
4  
5  
6  
7  
8  
9  
10  
11  
12  
13  
14  
15  
16  
17  
18  
19  
20  
21  
22  
23  
24  
25  
26  
27  
28  
29  
30  
31  
32  
33  
34  
35  
36  
37  
38  
39  
40  
41  
42  
43  
44  
45  
46  
47  
48  
49  
50  
51  
52  
53  
54  
55  
56  
57  
58  
59  
60

458 **FIGURE LEGEND:**

459 Figure 1 – PRISMA 2020 study flow diagram.

460

For peer review only

Figure 1: PRISMA 2020 study flow diagram

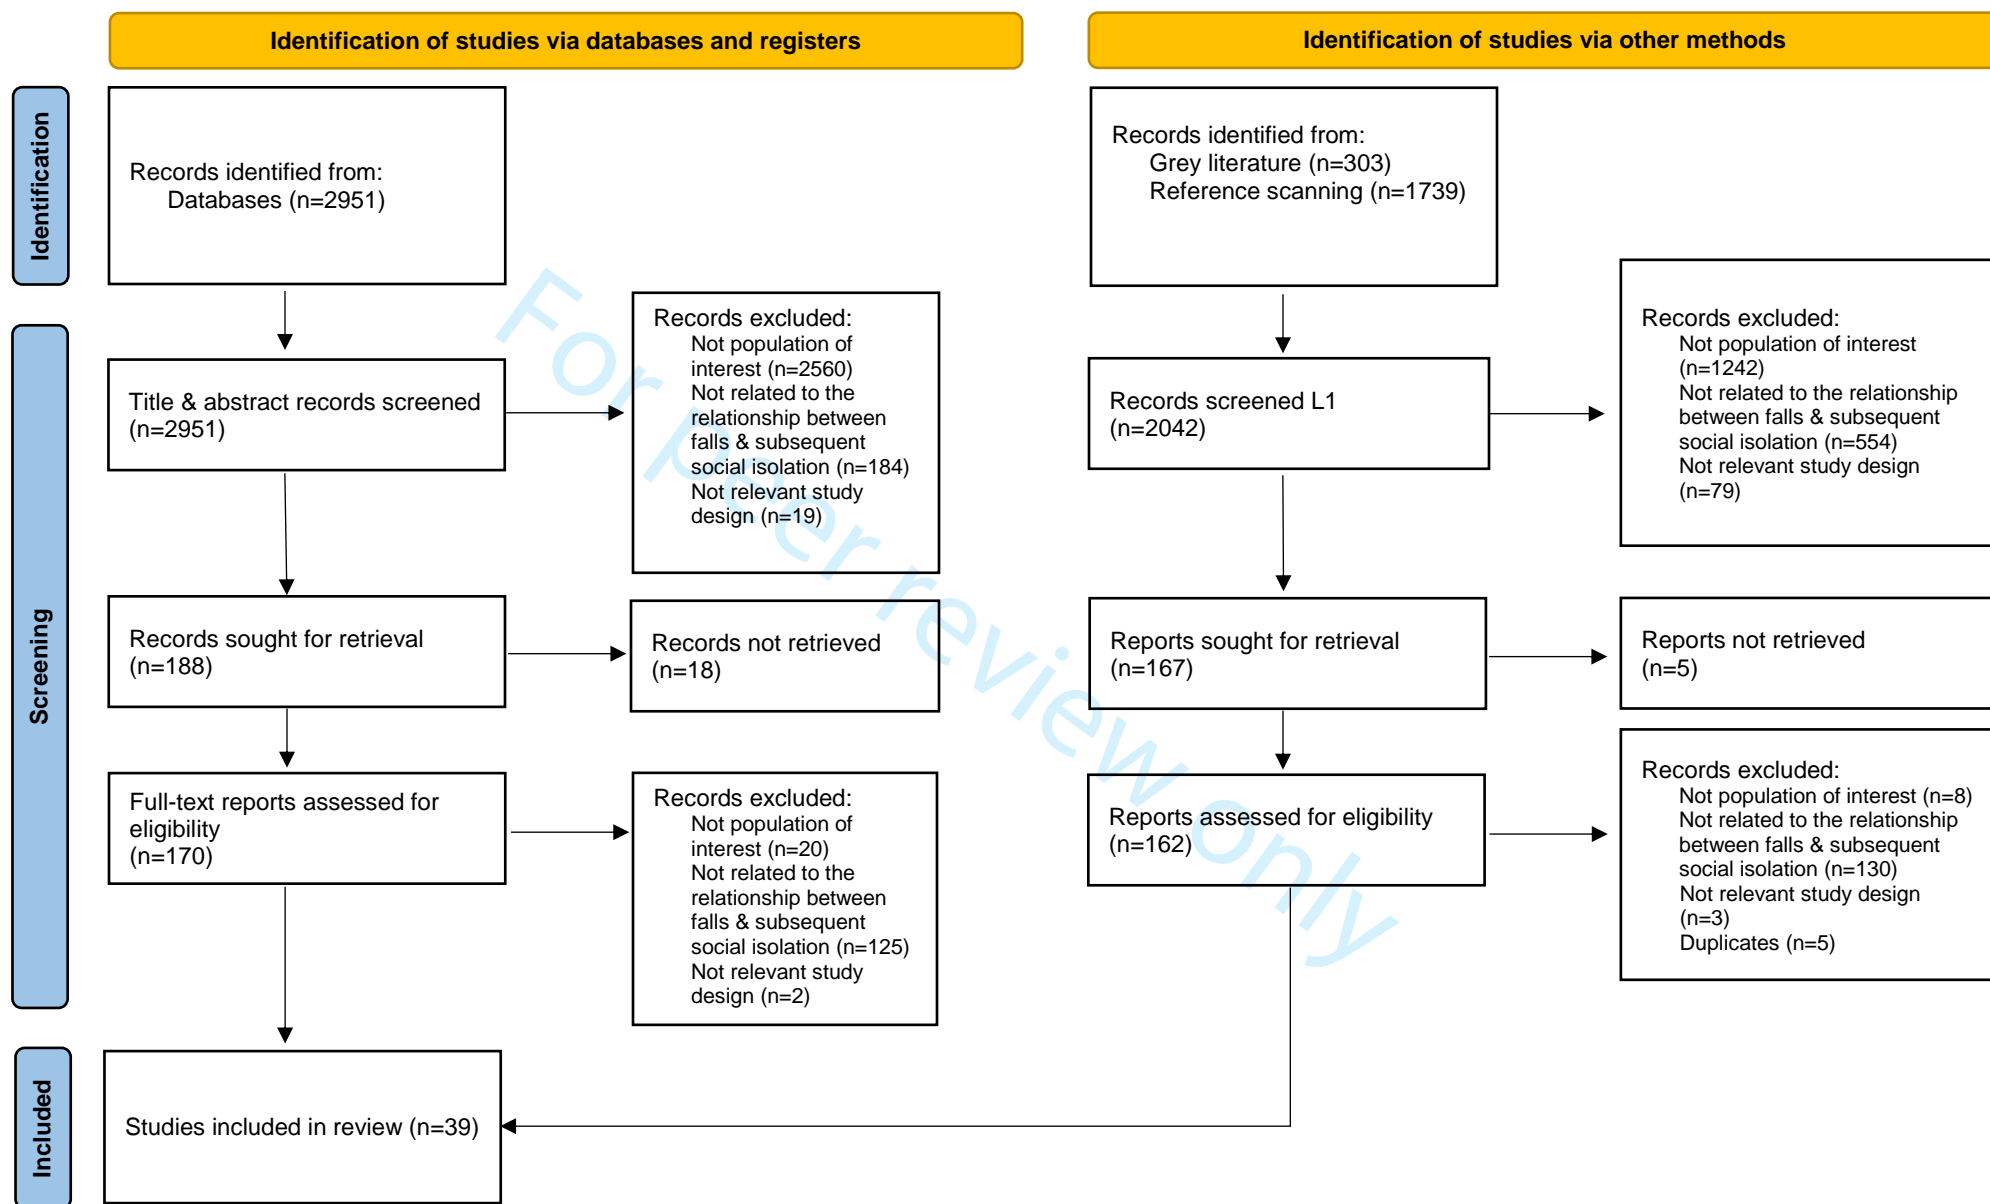

## Supplementary File 2: Appendices

|                                                                                                                               |    |
|-------------------------------------------------------------------------------------------------------------------------------|----|
| Appendix 1: Literature search strategies.....                                                                                 | 2  |
| Appendix 2: Study Characteristics (n=39).....                                                                                 | 4  |
| Appendix 3: Patient Characteristics (n=39).....                                                                               | 8  |
| Appendix 4: Mental health outcomes related to falls, fear of falling, and social isolation (n=6). 15                          |    |
| Appendix 5: Findings from included cohort studies (n=6).....                                                                  | 17 |
| Appendix 6: Cross-sectional studies reporting on falls and social isolation/loneliness (n=11) ...                             | 20 |
| Appendix 7: Cross-sectional studies reporting on fear of falling and activity restriction due to fear of falling (n= 15)..... | 24 |
| Appendix 8: Relevant findings from qualitative studies (n=7).....                                                             | 30 |

## Appendix 1: Literature search strategies

### Ovid MEDLINE(R) ALL <1946 to Jan 11, 2021>

1 Accidental Falls/  
 2 (slip\* or trip\* or stumbl\* or tumbl\*).tw,kf.  
 3 (fall\* or fell or "fall- related" or "near- fall").tw,kf.  
 4 or/1-3  
 5 limit 4 to "all aged (65 and over)"  
 6 exp Aged/ or geriatrics/  
 7 (geriatric\* or elder\* or age\* or "of age" or aging or senior\* or older  
 adult\* or retired or retiree\* or elder\* or pensioner\* or older people or older  
 patient\* or gerontology or Sexagenarian\* or septuagenarian\* or  
 octogenarian or nonagenarian\* or centenarian\* or sixties or seventies or  
 eighties or nineties).tw,kf.  
 8 4 and (6 or 7)  
 9 5 or 8  
 10 Social Isolation/  
 11 loneliness/  
 12 exp social support/  
 13 (social barrier\* or social isolat\* or social support\* or social car\* or  
 psychosocial support\* or psycho-social support\* or social frailt\* or  
 friendship\* or "social\* connected\*" or connectedness or lonely or loneliness  
 or "feel\* alone\*" or companionship).tw,kf.  
 14 ((lack or absence or minimi\*) adj2 (contact or communication or  
 support\*)),tw,kf.  
 15 or/10-14  
 16 9 and 15  
 17 animals/ not humans/  
 18 16 not 17

### PsycINFO <1806 to January Week 2 2021>

1 falls/  
 2 (slip\* or trip\* or stumbl\* or tumbl\*).tw.  
 3 (fall\* or fell or "fall- related" or "near- fall").tw.  
 4 or/1-3  
 5 limit 4 to "380 aged <age 65 yrs and older>"  
 6 (geriatric\* or elder\* or age\* or "of age" or aging or senior\* or older  
 adult\* or retired or retiree\* or elder\* or pensioner\* or older people or older  
 patient\* or gerontology or Sexagenarian\* or septuagenarian\* or

octogenarian or nonagenarian\* or centenarian\* or sixties or seventies or  
 eighties or nineties).tw.  
 7 4 and 6  
 8 5 or 7  
 9 social isolation/ or loneliness/ or social support/ or friendship/  
 10 (social barrier\* or social isolat\* or social support\* or social car\* or  
 psychosocial support\* or psycho-social support\* or social frailt\* or  
 friendship\* or "social\* connected\*" or connectedness or lonely or loneliness  
 or "feel\* alone\*" or companionship).tw.  
 11 ((lack or absence or minimi\*) adj2 (contact or communication or  
 support\*)),tw.  
 12 or/9-11  
 13 8 and 12  
 14 Limit 13 to human

### Embase Classic+Embase <1947 to 2021 January 11>

1 falling/  
 2 (slip\* or trip\* or stumbl\* or tumbl\*).tw.  
 3 (fall\* or fell or "fall- related" or "near- fall").tw.  
 4 or/1-3  
 5 limit 4 to aged <65+ years>  
 6 loneliness/ or social support/ or friendship/  
 7 exp social isolation/  
 8 (social barrier\* or social isolat\* or social support\* or social car\* or  
 psychosocial support\* or psycho-social support\* or social frailt\* or  
 friendship\* or "social\* connected\*" or connectedness or lonely or loneliness  
 or "feel\* alone\*" or companionship).tw.  
 9 ((lack or absence or minimi\*) adj2 (contact or communication or  
 support\*)),tw.  
 10 or/6-9  
 11 5 and 10  
 12 limit 11 to human

### Database: EBM Reviews - Cochrane Database of Systematic Reviews <2005 to January 11, 2021>, EBM Reviews - ACP Journal Club <1991 to January 11, 2021>, EBM Reviews - Cochrane Clinical Answers <January 2021>, EBM Reviews - Database of Abstracts of Reviews of Effects <1st Quarter 2016>

1 (slip\* or trip\* or stumbl\* or tumbl\*).mp.  
 2 (fall\* or fell or "fall- related" or "near- fall").mp.

1  
2  
3 1 or 2  
4 (geriatric\* or elder\* or age\* or "of age" or aging or senior\* or older  
5 adult\* or retired or retiree\* or elder\* or pensioner\* or older people or older  
6 patient\* or gerontology or Sexagenarian\* or septuagenarian\* or  
7 octogenarian or nonagenarian\* or centenarian\* or sixties or seventies or  
8 eighties or nineties).mp.  
9 5 3 and 4  
10 6 (social barrier\* or social isolat\* or social support\* or social car\* or  
11 psychosocial support\* or psycho-social support\* or social frailt\* or  
12 friendship\* or "social\* connected\*" or connectedness or lonely or loneliness  
13 or "feel\* alone\*" or companionship).mp.  
14 7 ((lack or absence or minimi\*) adj2 (contact or communication or  
15 support\*)).mp.  
16 8 6 or 7  
17 9 5 and 8

#### Joanna Briggs Institute EBP Database - <Current to January 11, 2021>

1 (slip\* or trip\* or stumbl\* or tumbl\*).mp.  
2 (fall\* or fell or "fall- related" or "near- fall").mp.  
3 1 or 2  
4 (geriatric\* or elder\* or age\* or "of age" or aging or senior\* or older  
5 adult\* or retired or retiree\* or elder\* or pensioner\* or older people or older  
6 patient\* or gerontology or Sexagenarian\* or septuagenarian\* or  
7 octogenarian or nonagenarian\* or centenarian\* or sixties or seventies or  
8 eighties or nineties).mp.  
9 5 3 and 4  
10 6 (social barrier\* or social isolation\* or social support\* or social car\* or  
11 psychosocial support\* or psycho-social support\* or social frailt\* or  
12 friendship\* or "social\* connected\*" or connectedness or lonely or loneliness  
13 or "feel\* alone\*" or companionship).mp.  
14 7 ((lack or absence or minimi\*) adj2 (contact or communication or  
15 support\*)).mp.  
16 8 6 or 7  
17 9 5 and 8

#### AMED (Allied and Complementary Medicine) <1985 to January 2021>

1 (slip\* or trip\* or stumbl\* or tumbl\*).mp.  
2 (fall\* or fell or "fall- related" or "near- fall").mp.  
3 1 or 2

4 (geriatric\* or elder\* or age\* or "of age" or aging or senior\* or older  
5 adult\* or retired or retiree\* or elder\* or pensioner\* or older people or older  
6 patient\* or gerontology or Sexagenarian\* or septuagenarian\* or  
7 octogenarian or nonagenarian\* or centenarian\* or sixties or seventies or  
8 eighties or nineties).mp.  
9 5 3 and 4  
10 6 (social barrier\* or social isolation\* or social support\* or social car\* or  
11 psychosocial support\* or psycho-social support\* or social frailt\* or  
12 friendship\* or "social\* connected\*" or connectedness or lonely or loneliness  
13 or "feel\* alone\*" or companionship).mp.  
14 7 ((lack or absence or minimi\*) adj2 (contact or communication or  
15 support\*)).mp.  
16 8 6 or 7  
17 9 5 and 8

## Appendix 2: Study Characteristics (n=39)

| Author, year        | Study title                                                                                                                               | Journal name                                                                   | Country     | Study design    | Study duration (months) |
|---------------------|-------------------------------------------------------------------------------------------------------------------------------------------|--------------------------------------------------------------------------------|-------------|-----------------|-------------------------|
| Apikomkon, 2003[26] | Fear of falling and fall circumstances in Thailand                                                                                        | NA                                                                             | Thailand    | cross-sectional | NA                      |
| Chiu, 2011[37]      | Psychosocial responses to falling in older Chinese immigrants living in the community                                                     | Dissertation Abstracts International Section A: Humanities and Social Sciences | Canada      | qualitative     | 6                       |
| Choi, 2015[30]      | Characteristics associated with fear of falling and activity restriction in South Korean older adults                                     | Journal of Aging and Health                                                    | South Korea | cross-sectional | NA                      |
| Curcio, 2009[4]     | Activity restriction related to fear of falling among older people in the Colombian Andes Mountain                                        | Journal of Aging and Health                                                    | Columbia    | cross-sectional | NA                      |
| Dias, 2011[5]       | Characteristics associated with activity restriction induced by fear of falling in community-dwelling elderly                             | Revista Brasileira de Fisioterapia                                             | Brazil      | cross-sectional | NA                      |
| Faes, 2010[36]      | Qualitative study on the impact of falling in frail older persons and family caregivers: Foundations for an intervention to prevent falls | Aging & Mental Health                                                          | Netherlands | qualitative     | NA                      |
| Faria, 2020[22]     | Elderly residents in the community: gaining knowledge to support a rehabilitation nursing program                                         | Revista Brasileira de Enfermagem                                               | Portugal    | cross-sectional | NA                      |
| Ferreira, 2018[31]  | Aspects of social participation and neighborhood perception: ELSI-Brazil                                                                  | Revista de saude Publica                                                       | Brazil      | cross sectional | NA                      |
| Finn, 2001[14]      | The relationship between falls and fall-related efficacy, depression, and social resources                                                | Dissertation Abstracts International: Section B: The Sciences and Engineering  | USA         | cross-sectional | NA                      |
| Gagnon, 2005[3]     | Affective correlates of fear of falling in elderly persons                                                                                | American Journal of Geriatric Psychiatry                                       | Canada      | cross-sectional | NA                      |
| Hajek, 2017[20]     | The association of falls with loneliness and social exclusion: evidence from the DEAS German Ageing Survey                                | BMC Geriatrics                                                                 | Germany     | cross-sectional | NA                      |

|                           |                                                                                                                                                                                       |                                                 |                                                                  |                 |    |
|---------------------------|---------------------------------------------------------------------------------------------------------------------------------------------------------------------------------------|-------------------------------------------------|------------------------------------------------------------------|-----------------|----|
| Hajek, 2020[13]           | What are the psychosocial consequences when fear of falling starts or ends? Evidence from an asymmetric fixed effects analysis based on longitudinal data from the general population | International Journal of Geriatric Psychiatry   | Germany                                                          | cohort          | 36 |
| Host, 2011[38]            | Older people's perception of and coping with falling, and their motivation for fall-prevention programmes                                                                             | Scandinavian Journal of Public Health           | Denmark                                                          | qualitative     | 2  |
| Howland, 1998[25]         | Covariates of fear of falling and associated activity curtailment                                                                                                                     | The Gerontological Society of America           | USA                                                              | cross-sectional | NA |
| Iliffe, 2007[16]          | Health risk appraisal in older people 2: the implications for clinicians and commissioners of social isolation risk in older people                                                   | British Journal of General Practice             | England                                                          | cross-sectional | NA |
| Kara, 2009[28]            | Evaluation of home environment and life satisfaction and falling in geriatrics: Examination of its relationship with fear                                                             | Physiotherapy Rehabilitation                    | Turkey                                                           | cross-sectional | NA |
| Mendes da Costa, 2012[29] | Fear of falling and associated activity restriction in older people. results of a cross-sectional study conducted in a Belgian town                                                   | Archives of Public Health                       | Belgium                                                          | cross-sectional | NA |
| Merchant, 2020[7]         | Relationship between fear of falling, fear-related activity restriction, frailty, and sarcopenia                                                                                      | Journal of the American Geriatrics Society      | Singapore                                                        | cross-sectional | NA |
| Meric, 2007[34]           | A qualitative study on the perceptions of old individuals regarding the life of the fall and its effect on their daily lives                                                          | Turkish Journal of Geriatrics                   | Turkey                                                           | qualitative     | 2  |
| Murphy, 2002[1]           | Characteristics associated with fear of falling and activity restriction in community-living older Persons                                                                            | Journal of the American Geriatrics Society      | USA                                                              | cross-sectional | NA |
| Nakaya, 2013[6]           | The association between self-reported history of physical diseases and psychological distress in a community-dwelling Japanese population: the Ohsaki Cohort 2006 Study               | European Journal of Public Health               | Japan                                                            | cross-sectional | NA |
| Nicholson, 2005[15]       | The relationship between injurious falls, fear of falling, social isolation, and depression                                                                                           | NA                                              | USA                                                              | cross-sectional | NA |
| Petrinec, 2020[32]        | Health-related quality of life of older women religious: negative influence of frailty                                                                                                | Western Journal of Nursing Research             | USA                                                              | cross-sectional | NA |
| Pin, 2016[11]             | Impact of falling on social participation and social support trajectories in a middle-aged and elderly European sample                                                                | Social Science and Medicine - Population Health | Denmark, Sweden, Netherlands, Austria, Germany, France, Belgium, | cohort          | 72 |



|                           |                                                                                                                                                  |                                                                               |                           |                 |    |
|---------------------------|--------------------------------------------------------------------------------------------------------------------------------------------------|-------------------------------------------------------------------------------|---------------------------|-----------------|----|
|                           |                                                                                                                                                  |                                                                               | Switzerland, Italy, Spain |                 |    |
| Quach, 2016[19]           | Social determinants of falls: The role of social support and depression among community-dwelling older adults                                    | Dissertation Abstracts International: Section B: The Sciences and Engineering | USA                       | cohort          | 36 |
| Robins, 2018[21]          | The association between physical activity and social isolation in community-dwelling older adults                                                | Aging & Mental Health                                                         | Australia                 | cross-sectional | NA |
| Schmid, 2009[35]          | Consequences of poststroke falls: activity limitation, increased dependence, and the development of fear of falling                              | American Journal of Occupational Therapy                                      | USA                       | qualitative     | 6  |
| Schnittger, 2012[18]      | Risk factors and mediating pathways of loneliness and social support in community-dwelling older adults                                          | Aging & Mental Health                                                         | Ireland                   | cross-sectional | NA |
| Stel, 2004[2]             | Consequences of falling in older men and women and risk factors for health service use and functional decline                                    | Age and Ageing                                                                | Netherlands               | cross-sectional | NA |
| Tinetti, 1998[9]          | The effect of falls and fall injuries on functioning in community-dwelling older persons                                                         | Journal of Gerontology                                                        | USA                       | cohort          | 36 |
| Tinetti, 1994[24]         | Fear of falling and fall-related efficacy in relationship to functioning among community-living elders                                           | Journal of Gerontology                                                        | USA                       | cross-sectional | NA |
| van der Meulen, 2014[10]  | Effect of fall-related concerns on physical, mental, and social function in community-dwelling older adults: A prospective cohort study          | Journal of American Geriatrics Society                                        | Netherlands               | cohort          | 14 |
| van Lankveld, 2011[17]    | Age-related health hazards in old patients with first-time referral to a rheumatologist: A descriptive study                                     | Arthritis                                                                     | Netherlands               | cross sectional | NA |
| Vanden Wyngaert, 2020[23] | Associations between the measures of physical function, risk of falls and the quality of life in haemodialysis patients: a cross-sectional study | BMC Nephrology                                                                | Belgium                   |                 |    |
| Vellas, 1987[8]           | Prospective study of restriction of activity in old people after falls                                                                           | Age and Ageing                                                                | France                    | cohort          | 6  |
| Ward-Griffin, 2004[33]    | Falls and fear of falling among community dwelling seniors: the dynamic tension between exercising precaution and striving for independence      | Canadian Journal on Aging                                                     | Canada                    | qualitative     | NA |

1  
2  
3  
4  
5  
6  
7  
8  
9  
10  
11  
12  
13  
14  
15  
16  
17  
18  
19  
20  
21  
22  
23  
24  
25  
26  
27  
28  
29  
30  
31  
32  
33  
34  
35  
36  
37  
38  
39  
40  
41  
42  
43  
44  
45  
46  
47

|                    |                                                                                                                                               |                                                       |             |                 |    |
|--------------------|-----------------------------------------------------------------------------------------------------------------------------------------------|-------------------------------------------------------|-------------|-----------------|----|
| Xu, 2019[39]       | Developing a falls prevention program for community-dwelling stroke survivors in Singapore: client and caregiver perspectives                 | Disability and Rehabilitation                         | Singapore   | qualitative     | NA |
| Yu, 2020[12]       | Longitudinal Assessment of the relationships between geriatric conditions and loneliness                                                      | Journal of the American Medical Directors Association | USA         | cohort          | 96 |
| Zijlstra, 2007[27] | Prevalence and correlates of fear of falling, and associated avoidance of activity in the general population of community-living older people | Age and Ageing                                        | Netherlands | cross-sectional | NA |

For peer review only

## Appendix 3: Patient Characteristics (n=39)

| DEMOGRAPHIC DATA          |                     |                     |                    |                              |                             |          |        |
|---------------------------|---------------------|---------------------|--------------------|------------------------------|-----------------------------|----------|--------|
| Author, year              | Overall sample size | Overall age (years) | Overall age (type) | Overall age variance (value) | Overall age variance (type) | % female | % male |
| Apikomokon, 2003[26]      | 546                 | NR                  | NR                 | 60-94                        | range                       | 61       | 39     |
| Chiu, 2011[37]            | 18                  | 81                  | mean               | 71 to 94                     | range                       | 88.9     | 11.1   |
| Choi, 2015[30]            | 4,247               | NR                  | NR                 | NR                           | NR                          | NR       | NR     |
| Curcio, 2009[4]           | 1668                | 70.9                | mean               | 7.4                          | SD                          | 54.5     | 45.5   |
| Dias, 2011[5]             | 113                 | 74.5                | mean               | 7                            | SD                          | 85       | 15     |
| Faes, 2010[36]            | 10                  | 70-90               | range              | NR                           | NR                          | 60       | 40     |
| Faria, 2020[22]           | 48                  | 75                  | mean               | 6.8                          | SD                          | 66.67    | 33.33  |
| Ferreira, 2018[31]        | 7935                | NR                  | NR                 | NR                           | NR                          | 56.9     | 43.1   |
| Finn, 2001[14]            | 49                  | NR                  | mean               | NR                           | SD                          | NR       | NR     |
| Gagnon, 2005[3]           | 105                 | 78.2                | mean               | 8.9                          | SD                          | 86.7     | 13.3   |
| Hajek, 2017[20]           | 7808                | 73.8                | mean               | 5.9                          | SD                          | 46.2     | 53.8   |
| Hajek, 2020[13]           | 8836                | 65.5                | mean               | 10.7                         | SD                          | 50.4     | 49.6   |
| Host, 2011[38]            | 14                  | 77                  | mean               | 68-87                        | range                       | 64.3     | 35.7   |
| Howland, 1998[25]         | 266                 | 76.3                | mean               | 7.9                          | SD                          | 77       | 23     |
| Illiffe, 2007[16]         | 3139                | NR                  | NR                 | 65-75+                       | range                       | 54.5     | 45.5   |
| Kara, 2009[28]            | 47                  | 71.7                | mean               | 5.6                          | SD                          | 55.3     | 44.7   |
| Mendes da Costa, 2012[29] | 501                 | NR                  | NR                 | 65-85+                       | NR                          | 57.7     | 42.3   |
| Merchant, 2020[7]         | 493                 | 73                  | mean               | 8                            | SD                          | 79.3     | 20.7   |
| Meric, 2007[34]           | 22                  | NR                  | NR                 | 65-83+                       | range                       | 63.6     | 36.4   |
| Murphy, 2002[1]           | 1064                | 79.6                | mean               | 5.3                          | SD                          | 73       | 27     |
| Nakaya, 2013[6]           | 43487               | 65+                 | range              | NR                           | NR                          | 53.9     | 46.1   |
| Nicholson, 2005[15]       | 68                  | 78.5                | mean               | 6.3                          | SD                          | 60.4     | 39.6   |
| Petrinec, 2020[32]        | 108                 | 75.6                | mean               | 65-93                        | range                       | 100      | 0      |
| Pin, 2016[11]             | 16583               | 50-95               | range              | NR                           | NR                          | NR       | NR     |
| Quach, 2016[19]           | 8464                | 74                  | mean               | 7                            | SD                          | 58.7     | 41.3   |
| Robins, 2018[21]          | 245                 | 77                  | mean               | 6                            | SD                          | 60       | 40     |
| Schmid, 2009[35]          | 42                  | 67.5                | mean               | 11.93                        | SD                          | NR       | NR     |
| Schnittger, 2012[18]      | 579                 | NR                  | NR                 | NR                           | NR                          | 69.1     | 30.9   |
| Stel, 2004[2]             | 204                 | 78.7                | mean               | 6.3                          | SD                          | 54.9     | 45.1   |
| Tinetti, 1998[9]          | 1103                | NR                  | NR                 | NR                           | NR                          | NR       | NR     |
| Tinetti, 1994[24]         | 1103                | 79.6                | mean               | 5.2                          | SD                          | 73       | 27     |

|                           |      |        |       |       |       |      |      |
|---------------------------|------|--------|-------|-------|-------|------|------|
| van der Meulen, 2014[10]  | 260  | 77.9   | mean  | 5     | SD    | 72.7 | 27.3 |
| van Lankveld, 2011[17]    | 154  | 79.2   | mean  | 5.1   | SD    | 79   | 21   |
| Vanden Wyngaert, 2020[23] | 113  | 67.5   | mean  | 16    | SD    | 42.5 | 57.5 |
| Vellas, 1987[8]           | 178  | 65-85+ | range | NR    | NR    | 76.4 | 23.6 |
| Ward-Griffin, 2004[33]    | 9    | 81.7   | mean  | 72-92 | range | 77.7 | 22.3 |
| Xu, 2019[39]              | 17   | 65     | mean  | 7     | SD    | 44.4 | 55.6 |
| Yu, 2020[12]              | 4680 | 74.01  | mean  | 9.69  | SD    | 56.1 | 43.9 |
| Zijlstra, 2007[27]        | 4376 | 77.1   | mean  | 4.9   | SD    | 59.9 | 40.1 |

| SETTING DATA        |                                                               |                                 |                               |                                                                                                                                                                                                                         |
|---------------------|---------------------------------------------------------------|---------------------------------|-------------------------------|-------------------------------------------------------------------------------------------------------------------------------------------------------------------------------------------------------------------------|
| Author, year        | Setting                                                       | Streamlined setting description | Participants living alone (%) | Description of access to caregivers                                                                                                                                                                                     |
| Apikomkon, 2003[26] | Community in 4 provinces of Thailand                          | Community                       | 9.9                           | NR                                                                                                                                                                                                                      |
| Chiu, 2011[37]      | Community in the Greater Toronto Area, Canada                 | Community                       | 61                            | Two respondents lived with their children. The rest lived alone or only with their spouse. Only seven of 18 respondents had at least one grown child living in the same city, who might provide assistance when needed. |
| Choi, 2015[30]      | Community setting in Korea                                    | Community                       | NR                            | NR                                                                                                                                                                                                                      |
| Curcio, 2009[4]     | Community in Columbian Andes Mountains                        | Community                       | 9.5                           | NR                                                                                                                                                                                                                      |
| Dias, 2011[5]       | Community setting in Brazil                                   | Community                       | 38                            | NR                                                                                                                                                                                                                      |
| Faes, 2010[36]      | Home and outpatient clinic in Netherlands                     | Community + Medical             | 10                            | All participants had access to a caregiver (either child or spouse)                                                                                                                                                     |
| Faria, 2020[22]     | Urban health unit in northern Portugal                        | Medical                         | NR                            | NR                                                                                                                                                                                                                      |
| Ferreira, 2018[31]  | Urban communities in Brazil                                   | Community                       | NR                            | NR                                                                                                                                                                                                                      |
| Finn, 2001[14]      | Two nursing homes in the Chicago Metropolitan Area, USA       | Nursing home                    | 0                             | In general, they have entered a nursing home because of an inability to adequately care for themselves, and they do not have anyone who can ably assist them, or they lack financial resources.                         |
| Gagnon, 2005[3]     | Medical or orthopedic wards of 3 hospitals in Toronto, Canada | Medical                         | 65.7                          | NR                                                                                                                                                                                                                      |
| Hajek, 2017[20]     | Communities in Germany                                        | Community                       | NR                            | NR                                                                                                                                                                                                                      |

|                           |                                                                                                                                           |           |      |                                                                                                         |
|---------------------------|-------------------------------------------------------------------------------------------------------------------------------------------|-----------|------|---------------------------------------------------------------------------------------------------------|
| Hajek, 2020[13]           | Community in Germany                                                                                                                      | Community | 28.9 | NR                                                                                                      |
| Host, 2011[38]            | Copenhagen area in Denmark                                                                                                                | Community | 64.3 | NR                                                                                                      |
| Howland, 1998[25]         | Communities in Eastern Massachusetts                                                                                                      | Community | 87   | NR                                                                                                      |
| Iliffe, 2007[16]          | Community in London, England                                                                                                              | Community | 32.8 | NR                                                                                                      |
| Kara, 2009[28]            | Districts of Narlıdere, Gülbahçe and Mordoğan in Izmir, Turkey                                                                            | Community | 27.7 | NR                                                                                                      |
| Mendes da Costa, 2012[29] | Community in Walloon region of Belgium                                                                                                    | Community | 36.4 | NR                                                                                                      |
| Merchant, 2020[7]         | Community in northwest region of Singapore                                                                                                | Community | NR   | NR                                                                                                      |
| Meric, 2007[34]           | Geriatric Outpatient of Gülhane Military Medical Academy in Turkey                                                                        | Medical   | 13.6 | NR                                                                                                      |
| Murphy, 2002[1]           | Community setting in New Haven, Connecticut, USA                                                                                          | Community | 70   | NR                                                                                                      |
| Nakaya, 2013[6]           | Community in Japan                                                                                                                        | Community | NR   | 87.3% reported sufficient social support, 12.2% reported lack of social support, 4.2% unknown.          |
| Nicholson, 2005[15]       | Community in United States                                                                                                                | Community | 53.4 | NR                                                                                                      |
| Petrinec, 2020[32]        | Cleveland Catholic Diocese in USA                                                                                                         | Community | 100  | Participants were not included if they needed caregiver assistance.                                     |
| Pin, 2016[11]             | Communities in 10 European Countries (Denmark, Sweden, The Netherlands, Austria, Germany, France, Belgium, Switzerland, Italy, and Spain) | Community | NR   | NR                                                                                                      |
| Quach, 2016[19]           | Communities in USA                                                                                                                        | Community | 23.3 | One-third did not have the perceived support with basic personal care (eating or dressing) when needed. |
| Robins, 2018[21]          | Communities in Australia                                                                                                                  | Community | 49   | NR                                                                                                      |
| Schmid, 2009[35]          | Community in United States                                                                                                                | Community | NR   | All participants had a caregiver.                                                                       |
| Schnittger, 2012[18]      | Technology Research for Independent Living (TRIL) clinic at St James's Hospital, Dublin.                                                  | Medical   | NR   | NR                                                                                                      |
| Stel, 2004[2]             | Community in three regions in the Netherlands                                                                                             | Community | NR   | NR                                                                                                      |

1  
2  
3  
4  
5  
6  
7  
8  
9  
10  
11  
12  
13  
14  
15  
16  
17  
18  
19  
20  
21  
22  
23  
24  
25  
26  
27  
28  
29  
30  
31  
32  
33  
34  
35  
36  
37  
38  
39  
40  
41  
42  
43  
44  
45  
46  
47

|                           |                                                                                                     |           |      |                                                                                                                          |
|---------------------------|-----------------------------------------------------------------------------------------------------|-----------|------|--------------------------------------------------------------------------------------------------------------------------|
| Tinetti, 1998[9]          | Community in New Haven, Connecticut, USA                                                            | Community | NR   | NR                                                                                                                       |
| Tinetti, 1994[24]         | Community in New Haven, Connecticut, USA                                                            | Community | 69   | NR                                                                                                                       |
| van der Meulen, 2014[10]  | Community in the Netherlands                                                                        | Community | 53.1 | NA                                                                                                                       |
| van Lankveld, 2011[17]    | Community in the Netherlands                                                                        | Community | NR   | NR                                                                                                                       |
| Vanden Wyngaert, 2020[23] | Dialysis centres in Belgium                                                                         | Medical   | NR   | NR                                                                                                                       |
| Vellas, 1987[8]           | Community in Toulouse, France                                                                       | Community | NR   | NR                                                                                                                       |
| Ward-Griffin, 2004[33]    | Community in Canada (11 senior apartment towers and in the Health Information and Promotion Centre) | Community | 77.7 | NR                                                                                                                       |
| Xu, 2019[39]              | Community rehabilitation centers in Singapore                                                       | Medical   | 0    | Four family caregivers (two male) and four maids (all female) were interviewed. 33% employed a maid as a main caregiver. |
| Yu, 2020[12]              | Community in USA                                                                                    | Community | NR   | NR                                                                                                                       |
| Zijlstra, 2007[27]        | Community in two urban areas in the Netherlands                                                     | Community | 44   | NR                                                                                                                       |

| FALLS AND FRAILITY DATA |                                          |                                                                                                                                   |                               |               |                       |                            |                        |                       |
|-------------------------|------------------------------------------|-----------------------------------------------------------------------------------------------------------------------------------|-------------------------------|---------------|-----------------------|----------------------------|------------------------|-----------------------|
| Author, year            | Participants with history of falling (%) | List of comorbidities [comorbidity 1 (%), etc.]                                                                                   | Participants with frailty (%) | Frailty scale | Overall frailty score | Overall frailty score type | Frailty variance value | Frailty variance type |
| Apikomokon, 2003[26]    | 21                                       | NR                                                                                                                                | NR                            | NR            | NR                    | NR                         | NR                     | NR                    |
| Chiu, 2011[37]          | 100                                      | All participants reported having chronic conditions. The most common physical conditions reported were diabetes and hypertension. | NR                            | NR            | NR                    | NR                         | NR                     | NR                    |
| Choi, 2015[30]          | NR                                       | NR                                                                                                                                | NR                            | NR            | NR                    | NR                         | NR                     | NR                    |
| Curcio, 2009[4]         | 31.9                                     | Hypertension (53.0), Osteoarthritis (39.2), heart disease (20.2), COPD                                                            | NR                            | NR            | NR                    | NR                         | NR                     | NR                    |

|                           |            |                                                                                                                                                                                          |      |             |    |    |    |    |
|---------------------------|------------|------------------------------------------------------------------------------------------------------------------------------------------------------------------------------------------|------|-------------|----|----|----|----|
|                           |            | (16.8), Diabetes Mellitus (13.4), Lower extremities fracture (11.7), Pain in joints (33.1), Dizziness (15.2), Breathlessness (11.4), Hearing impairment (33.0), visual impairment (68.9) |      |             |    |    |    |    |
| Dias, 2011[5]             | NR         | NR                                                                                                                                                                                       | NR   | NR          | NR | NR | NR | NR |
| Faes, 2010[36]            | 100        | Cognitive impairment (70%)                                                                                                                                                               | NR   | NR          | NR | NR | NR | NR |
| Faria, 2020[22]           | 25         | Cardiovascular diseases (76.6), endocrine diseases (56.8), musculoskeletal diseases (45.7), depression (16.3), respiratory diseases (14.3) and cerebrovascular diseases (9.3).           | NR   | NR          | NR | NR | NR | NR |
| Ferreira, 2018[31]        | NR         | Overweight (women=65.2%, men=59.0%)                                                                                                                                                      | NR   | NR          | NR | NR | NR | NR |
| Finn, 2001[14]            | 51         | NR                                                                                                                                                                                       | NR   | NR          | NR | NR | NR | NR |
| Gagnon, 2005[3]           | 100        | NR                                                                                                                                                                                       | NR   | NR          | NR | NR | NR | NR |
| Hajek, 2017[20]           | 17.6       | NR                                                                                                                                                                                       | NR   | NR          | NR | NR | NR | NR |
| Hajek, 2020[13]           | NR         | Number of physical illnesses is mean = 2.6, SD = 1.9                                                                                                                                     | NR   | NR          | NR | NR | NR | NR |
| Host, 2011[38]            | 100        | NR                                                                                                                                                                                       | NR   | NR          | NR | NR | NR | NR |
| Howland, 1998[25]         | 35         | Vision problems (26), stroke (11), dizziness (29)                                                                                                                                        | NR   | NR          | NR | NR | NR | NR |
| Iiliffe, 2007[16]         | 11.20      | Two or more chronic conditions (59.0%), takes 4 or more meds (33.4%)                                                                                                                     | NR   | NR          | NR | NR | NR | NR |
| Kara, 2009[28]            | 29.9       | NR                                                                                                                                                                                       | NR   | NR          | NR | NR | NR | NR |
| Mendes da Costa, 2012[29] | 31.6       | NR                                                                                                                                                                                       | NR   | NR          | NR | NR | NR | NR |
| Merchant, 2020[7]         | mean = 0.4 | NR                                                                                                                                                                                       | 51.3 | FRAIL scale | NR | NR | NR | NR |
| Meric, 2007[34]           | 81         | NR                                                                                                                                                                                       | NR   | NR          | NR | NR | NR | NR |
| Murphy, 2002[1]           | 39.70      | Chronic dizziness (24.2), 5 or more medications (35.8), vision impairment (40.5)                                                                                                         | NR   | NR          | NR | NR | NR | NR |
| Nakaya, 2013[6]           | 17.3       | NR                                                                                                                                                                                       | NR   | NR          | NR | NR | NR | NR |
| Nicholson, 2005[15]       | 100        | NR                                                                                                                                                                                       | NR   | NR          | NR | NR | NR | NR |

1  
2  
3  
4  
5  
6  
7  
8  
9  
10  
11  
12  
13  
14  
15  
16  
17  
18  
19  
20  
21  
22  
23  
24  
25  
26  
27  
28  
29  
30  
31  
32  
33  
34  
35  
36  
37  
38  
39  
40  
41  
42  
43  
44  
45  
46  
47

|                           |      |                                                                                                                                                                                                                                                                                                                                                                                                                                                                                                       |    |                                 |    |    |    |    |
|---------------------------|------|-------------------------------------------------------------------------------------------------------------------------------------------------------------------------------------------------------------------------------------------------------------------------------------------------------------------------------------------------------------------------------------------------------------------------------------------------------------------------------------------------------|----|---------------------------------|----|----|----|----|
| Petrinec, 2020[32]        | NR   | Hypertension (60), Cataracts (60), Thyroid disorders (30), Osteoporosis (17), Diabetes (7)                                                                                                                                                                                                                                                                                                                                                                                                            | 19 | Tilburg Frailty Indicator (TFI) | NR | NR | NR | NR |
| Pin, 2016[11]             | 2.8  | NR                                                                                                                                                                                                                                                                                                                                                                                                                                                                                                    | NR | NR                              | NR | NR | NR | NR |
| Quach, 2016[19]           | 38.0 | NR                                                                                                                                                                                                                                                                                                                                                                                                                                                                                                    | NR | NR                              | NR | NR | NR | NR |
| Robins, 2018[21]          | 38   | Congestive heart failure (4%); Heart disease (33%); stroke (9%); Cancer (25%); diabetes (18%); lung disease (16%); Parkinson's disease (1%)                                                                                                                                                                                                                                                                                                                                                           | NR | NR                              | NR | NR | NR | NR |
| Schmid, 2009[35]          | NR   | Stroke (100%)                                                                                                                                                                                                                                                                                                                                                                                                                                                                                         | NR | NR                              | NR | NR | NR | NR |
| Schnittger, 2012[18]      | NR   | NR                                                                                                                                                                                                                                                                                                                                                                                                                                                                                                    | NR | NR                              | NR | NR | NR | NR |
| Stel, 2004[2]             | 100  | Dizziness (27.9%), visual impairment (23%)                                                                                                                                                                                                                                                                                                                                                                                                                                                            | NR | NR                              | NR | NR | NR | NR |
| Tinetti, 1998[9]          | 30.3 | NR                                                                                                                                                                                                                                                                                                                                                                                                                                                                                                    | NR | NR                              | NR | NR | NR | NR |
| Tinetti, 1994[24]         | 39   | One or more chronic conditions (78%)                                                                                                                                                                                                                                                                                                                                                                                                                                                                  | NR | NR                              | NR | NR | NR | NR |
| van der Meulen, 2014[10]  | 55.5 | NA                                                                                                                                                                                                                                                                                                                                                                                                                                                                                                    | NR | NA                              | NA | NA | NA | NA |
| van Lankveld, 2011[17]    | 44   | Cardiac 36%, hypertension 40%, vascular 25%, respiratory 12%, EENT 21%, upper GI 14%, lower GI 10%, Hepatic 3%, kidney 3%, other GU 16%, neurological 18%, endocrine 21%, psychiatric 8%, Rheumatic disease general (56%), Osteoarthritis (49%), Spondylosis(31%), Rheumatoid arthritis(17%), Arthritis otherwise defined (12%), Gout (6%), Chodrocalcinosis (12%), Osteoporosis (1%), Shoulder problem (6%), Polymyalgia rheumatica (3%), Soft tissue (1%), Carpal tunnel syndrome (2%), Others (6%) | NR | NR                              | NR | NR | NR | NR |
| Vanden Wyngaert, 2020[23] | NR   | Cardiovascular disease (74.3%) diabetes (46.0%) musculoskeletal complications (44.2%), Neuropathy (28.3), retinopathy (31.9), respiratory complications (24.8), hepatopathy (17.7), pain (27.4%), depression                                                                                                                                                                                                                                                                                          | NR | NR                              | NR | NR | NR | NR |



|                        |            |                                                                       |    |    |    |    |    |    |
|------------------------|------------|-----------------------------------------------------------------------|----|----|----|----|----|----|
|                        |            | (23.9%), fatigue (18.6%), anxiety (15.0%), sleep disturbances (12.4%) |    |    |    |    |    |    |
| Vellas, 1987[8]        | 50         | NR                                                                    | NR | NR | NR | NR | NR | NR |
| Ward-Griffin, 2004[33] | NR         | NR                                                                    | NR | NR | NR | NR | NR | NR |
| Xu, 2019[39]           | 100        | Stroke (100%)                                                         | NR | NR | NR | NR | NR | NR |
| Yu, 2020[12]           | mean =0.74 | The mean number of comorbidities at baseline was 2.24 (SD=1.38)       | NR | NR | NR | NR | NR | NR |
| Zijlstra, 2007[27]     | 32.6       | NR                                                                    | NR | NR | NR | NR | NR | NR |

For peer review only

## Appendix 4: Mental health outcomes related to falls, fear of falling, and social isolation (n=6)

| Author, Year    | Sample | Results                                                                                                                                                                                                                                                                                                                                                                             | Text description/ interpretation of findings                                                                                                                                                                                                                                                                                                                                                                                                                                                                                                                                                                                                                                                                                                                          |
|-----------------|--------|-------------------------------------------------------------------------------------------------------------------------------------------------------------------------------------------------------------------------------------------------------------------------------------------------------------------------------------------------------------------------------------|-----------------------------------------------------------------------------------------------------------------------------------------------------------------------------------------------------------------------------------------------------------------------------------------------------------------------------------------------------------------------------------------------------------------------------------------------------------------------------------------------------------------------------------------------------------------------------------------------------------------------------------------------------------------------------------------------------------------------------------------------------------------------|
| Murphy, 2002[1] | n=1064 | <p><b>Variables independently associated with activity restriction in participants with fear of falling</b></p> <p><i>Depression (CES-D scale)</i><br/>Adj relative risk: 1.27 (95% CI, 1.00-1.60); p=0.048</p>                                                                                                                                                                     | “We found that a history of an injurious fall within the past year, slow timed physical performance, two or more chronic conditions, and depressive symptoms were all independently associated with activity restriction.”                                                                                                                                                                                                                                                                                                                                                                                                                                                                                                                                            |
| Stel, 2004[2]   | n=204  | <p><b>Relationship between higher depression score and decline in social activities because of a fall</b></p> <p>OR: 2.0 (95% CI: 1.2-3.3); p&lt;0.05</p>                                                                                                                                                                                                                           | “A decline in functional status, social activities and physical activities was reported more often in respondents with a higher depression score.”                                                                                                                                                                                                                                                                                                                                                                                                                                                                                                                                                                                                                    |
| Gagnon, 2005[3] | n=105  | <p><b>Variables associated with fear of falling</b><br/>(Comparing subjects with no/slight fear and subjects with moderate/severe fear)</p> <p><b>Depression</b><br/>(Structured Clinical Interview for DSM-IV (SCID))</p> <p>Wald chi-square= 8.76; p=0.03</p> <p><b>Anxiety</b><br/>(Structured Clinical Interview for DSM-IV (SCID))</p> <p>Wald chi-square= 5.95; p&lt;0.02</p> | <p>“Not only were depressive disorders and depression severity independently associated with fear of falling, but depression had the strongest association with this fear among all the variables that we measured.</p> <p>Given that this was a cross-sectional study, a causal relationship between depression and fear of falling cannot be inferred. [...] It is possible, therefore, that in some individuals, fear of falling is an anxious manifestation of depression. However, depression could also be a consequence of activity restriction or social isolation resulting from a fear of falling”</p> <p>“Depressive disorders and anxiety disorders were significantly associated with categorical fear of falling, independently of these variables”</p> |
| Curcio, 2009[4] | n=1668 | <p><b>Variables associated with activity restriction related to fear of falling</b></p> <p><b>Depression</b><br/>OR: 1.76 (95% CI, 1.38-2.24)</p>                                                                                                                                                                                                                                   | “A second model was then constructed with the psychosocial associated factors and other clinical and functional covariates (see Table 4). After adjustment, functional and clinical factors remained independently associated with activity restriction related to fear of falling. Only depression and poor perceived health variables emerged as independent factors.”                                                                                                                                                                                                                                                                                                                                                                                              |
| Dias, 2011[5]   | n=113  | <p><b>Variables associated with activity restriction due to fear of falling</b><br/>(compared to no FOF or FOF alone)</p>                                                                                                                                                                                                                                                           | “The variables that best discriminated the groups were depression, exhaustion and participation in social activities, demonstrated in the diagram (Figure 1). For the grouping obtained through the Chi-square                                                                                                                                                                                                                                                                                                                                                                                                                                                                                                                                                        |

|                   |         |                                                                                                                                                                                                                                                                                               |                                                                                                                                                                                                                                                                                                                                                                                                                                                                                                                                                                                                                                                                                                                                                                                                                                                                                                                  |
|-------------------|---------|-----------------------------------------------------------------------------------------------------------------------------------------------------------------------------------------------------------------------------------------------------------------------------------------------|------------------------------------------------------------------------------------------------------------------------------------------------------------------------------------------------------------------------------------------------------------------------------------------------------------------------------------------------------------------------------------------------------------------------------------------------------------------------------------------------------------------------------------------------------------------------------------------------------------------------------------------------------------------------------------------------------------------------------------------------------------------------------------------------------------------------------------------------------------------------------------------------------------------|
|                   |         | <p><b>Depression</b><br/>Chi-square=15.2, p=0.004</p>                                                                                                                                                                                                                                         | <p>Automatic Interaction Detection (CHAID) method, it may be observed that the first distinctive characteristic was depression, evaluated using GDS. Those with positive symptoms for depression showed 90% chance of restricting activities due to fear of falling.</p> <p>Additionally, the presence of depressive symptoms seems to modulate the factors that are associated with activity restriction due to fear of falling. A greater risk for depression has been associated with inadequate evaluation of coping self-efficacy in stressful events of life. It is worth noting that the participants of the present study who restricted activities by FOF showed lower self-efficacy in relation to the other participants. Thus, it is possible that elders with depressive symptoms perceive themselves less capable of performing certain tasks and, because of that, restrict their activities.</p> |
| Nakaya, 2013[6]   | n=43487 | <p><b>Relationship between history of falling and psychological distress</b></p> <p><u>Sufficient social support</u><br/>OR, 1.6 (95% CI: 1.3-1.9)<br/>p&lt;0.01</p> <p><u>Lack of social support</u><br/>OR, 2.0 (95% CI: 1.4-2.8)<br/>p&lt;0.01</p>                                         | <p>“We also conducted stratified analyses regarding OR of psychological distress according to differences in social support status. Almost all subjects with a history of physical disease (including those with history of fall/fracture) were at increased risk of psychological distress, regardless of social support.”</p>                                                                                                                                                                                                                                                                                                                                                                                                                                                                                                                                                                                  |
| Merchant, 2020[7] | n=493   | <p><b>Variables associated with fear of falling alone</b></p> <p><b>Depression</b><br/>OR, 4.90 ( 95% CI, 1.06–22.67)<br/>p&lt;0.05</p> <p><b>Variables associated with fear of falling + fear-based activity restriction</b></p> <p><b>Depression</b><br/>OR, 5.17 ( 95% CI, 1.84–14.54)</p> | <p>“In our study, FOF and/or FAR were both significantly associated with <b>depression</b> in univariate and multivariate logistics regression model. Those with FOF + FAR were nine times more likely to be depressed than those with no FOF. [...] Strong links between depressive symptoms with FOF and/or FAR have been reported in various studies, and their association is believed to be bidirectional, where management of one condition would improve the other.”</p>                                                                                                                                                                                                                                                                                                                                                                                                                                  |

## Appendix 5: Findings from included cohort studies (n=6)

| Author, Year     | Sample                                                                                                                                                                                           | Results                                                                                                                                                                                                                                                                                                                                                                                                                                                                                                                                                                                                                                                                                                                                                                  | Text description/ interpretation of findings                                                                                                                                                                                                                                                                                                                                                                                                                                                                                                                                                                                                                                                                                                                                                                                                                                 |
|------------------|--------------------------------------------------------------------------------------------------------------------------------------------------------------------------------------------------|--------------------------------------------------------------------------------------------------------------------------------------------------------------------------------------------------------------------------------------------------------------------------------------------------------------------------------------------------------------------------------------------------------------------------------------------------------------------------------------------------------------------------------------------------------------------------------------------------------------------------------------------------------------------------------------------------------------------------------------------------------------------------|------------------------------------------------------------------------------------------------------------------------------------------------------------------------------------------------------------------------------------------------------------------------------------------------------------------------------------------------------------------------------------------------------------------------------------------------------------------------------------------------------------------------------------------------------------------------------------------------------------------------------------------------------------------------------------------------------------------------------------------------------------------------------------------------------------------------------------------------------------------------------|
| Vellas, 1987[8]  | n=178<br><br>Studied two populations:<br>1) Individuals living in a retirement home (Fall victims = 59; Non-fallers=59)<br><br>2) Individuals living at home (Fall victims = 30; Non-fallers=30) | <u>Retirement home (n=118)</u><br>Among the fall victims there was a tendency towards restriction of activity: 3% walked less indoors, 5% went outside less, 4% had no leisure activity, 7% no longer visited their children and 11% no longer visited their friends. The lack of significance ( $P>0.05$ ) is linked both to the very low level of activity on day 1 of the aged population living in retirement homes and to our small sample.<br><br><u>At home (n=60)</u><br>On day 1, the fallers and control group had identical levels of activity. Reported a significant difference in the number of participants who maintained the same level of activity after 6 months, with this number being reduced in fall victims compared to non-fallers ( $p<0.02$ ) | <p>“The interpersonal relationships of the fallers were very poor: 90% did not belong to any group, 54% never visited their children, 40% never visited anybody.”</p> <p>“A fall may lead to loss of autonomy. Factors arising as a result of falls have been identified by Isaacs and his co-workers. Our prospective study confirms these findings and demonstrates the restriction of activity following a fall without fracture.”</p> <p>“Falls in elderly persons give rise to a decrease in activity and social life. The fear of recurrence often leads to 'institutionalizing' the patient. But, it is difficult to show whether falls are an indication or the cause of the loss of autonomy.”</p>                                                                                                                                                                  |
| Tinetti, 1998[9] | n=1103 at baseline, 770 at 3 years follow-up                                                                                                                                                     | <b>Effect of having 2 or more non-injurious falls on social functioning</b> (Social Activity Scale):<br><br>Regression coefficient = -0.538 ( $p<0.05$ )                                                                                                                                                                                                                                                                                                                                                                                                                                                                                                                                                                                                                 | <p>“While there did not appear to be an increased risk of decline in social functioning among participants experiencing a single noninjurious fall, repetitive fallers experienced a decline in social functioning in both short- and long-term follow-up analyses. The relationship between repetitive falling and decline in social functioning remained after adjusting for each category of covariates.</p> <p>Experiencing a serious fall injury, on the other hand, was only marginally associated with decline in social functioning over the 1-year follow-up, and not at all over the 3-year follow-up. Preferential loss to follow-up of persons experiencing decline in social functioning between the 1- and 3-year follow-up interviews might at least partially explain the lack of relationship between injurious falls and change in social activities.”</p> |

|                          |                                                                                                                                                |                                                                                                                                                                                                                                                                                                                                                                                                                                                                                                                                                                                                                                                                                                                                                                                                    |                                                                                                                                                                                                                                                                                                                                                                                                                                                                                                                                                                                                                                                                                                                                                                                                                                                                                                                                                                                                                                                                                                                                                                                                                                                                                                                                                                                                              |
|--------------------------|------------------------------------------------------------------------------------------------------------------------------------------------|----------------------------------------------------------------------------------------------------------------------------------------------------------------------------------------------------------------------------------------------------------------------------------------------------------------------------------------------------------------------------------------------------------------------------------------------------------------------------------------------------------------------------------------------------------------------------------------------------------------------------------------------------------------------------------------------------------------------------------------------------------------------------------------------------|--------------------------------------------------------------------------------------------------------------------------------------------------------------------------------------------------------------------------------------------------------------------------------------------------------------------------------------------------------------------------------------------------------------------------------------------------------------------------------------------------------------------------------------------------------------------------------------------------------------------------------------------------------------------------------------------------------------------------------------------------------------------------------------------------------------------------------------------------------------------------------------------------------------------------------------------------------------------------------------------------------------------------------------------------------------------------------------------------------------------------------------------------------------------------------------------------------------------------------------------------------------------------------------------------------------------------------------------------------------------------------------------------------------|
| Van der Meulen, 2014[10] | <p>n=260</p> <p>Low level of concern about falling (n=127)</p> <p>High level of concern about falling (n=129)</p> <p>Follow-up = 14 months</p> | <p><b>Social participation</b><br/>(Frenchay Activities Index)</p> <p><u>Low level falling concern:</u><br/>Baseline mean, 39.9 (SD, 7.1)<br/>Follow-up mean, 38.8 (SD, 7.6)</p> <p><u>High level falling concern:</u><br/>Baseline mean, 36.8 (SD, 7)<br/>Follow-up mean, 35.7 (SD, 7.7)</p> <p><b>p-value = 0.006</b></p>                                                                                                                                                                                                                                                                                                                                                                                                                                                                        | <p>“High and low levels of fall-related concerns predicted significant differences in ADL dysfunction and social participation that were persistent over 14 months of follow-up. [...] Accompanying effect size estimations were medium (social participation) to large (ADL dysfunction).”</p>                                                                                                                                                                                                                                                                                                                                                                                                                                                                                                                                                                                                                                                                                                                                                                                                                                                                                                                                                                                                                                                                                                              |
| Pin, 2016[11]            | <p>n=16583</p> <p>Fallers (n=411)</p> <p>Non-fallers (n=14205)</p>                                                                             | <p><b>Effect of falls on social participation</b><br/>(binary variable based on if they reported performing at least one activity from a prespecified list of activities)</p> <p>Model 2 adjusted by time, age, sociodemographic variables and health indicators:<br/>OR, 0.86 [95% CI, 0.76-0.89] (p&lt;0.001)</p> <p>Model 3 added adjustment for frailty:<br/>OR, 0.95 [95% CI, 0.89-1.02]<br/>The interaction between initial frailty status and falling was significant (Table 4, Model 7a).<br/>Contrast analyses revealed that the probability of social participation was less among frail people than among people who did not meet any of the frailty criteria in both fallers (<math>\chi^2</math> (1)=6.93; p&lt;0.01) and non-fallers (<math>\chi^2</math> (1)=41.21; p&lt;0.001)</p> | <p>“Falling significantly decreased the probability of social participation in each of these activities and of participation in at least one of them, but only before frailty was introduced into the models (Table 3, Models 2 and 3). Frailty is indeed a strong confounder in the relationship between falls and social participation. When it is taken in consideration in multivariate models, the size of the effect for falling decreased and was no longer significant.”</p> <p>“Then, we demonstrated the major role of frailty in the relationship between falling and social participation. The construction of the frailty phenotype (Fried et al., 2001; Santos-Eggimann et al., 2009) was based on its physical component. In this manner, frailty and falling were very close constructs. They shared similar risk factors, such as mobility disorders or bone density, and they had similar consequences in terms of disability or mortality. Moreover, we showed that they had similar consequences in terms of social participation. Thus, it may be difficult to distinguish between the two concepts and to identify a specific impact of falling (Nowak &amp; Hubbard, 2009). However, our analyses showed that the continuity in or disengagement from social activities was due to a long-term process that was amplified by health events, rather than by the falls themselves.”</p> |
| Yu, 2020[12]             | <p>n=4680</p>                                                                                                                                  | <p><b>Relationship between number of falls and loneliness over 3 time-points</b><br/>(3 item UCLA Loneliness Scale)</p> <p>Regression coefficient = 0.008, SE = 0.04, p = 0.048;</p>                                                                                                                                                                                                                                                                                                                                                                                                                                                                                                                                                                                                               | <p>“Only the number of falls was significantly correlated with the loneliness score in the next time point, and more frequent loneliness at the previous wave predicts an increased number of falls in 4 years [...] The results suggest that a vicious circle relationship exists between loneliness and falls. [...] An increased number of falls also predicted more frequent loneliness in 4 years. These findings support evidence reported in cross-</p>                                                                                                                                                                                                                                                                                                                                                                                                                                                                                                                                                                                                                                                                                                                                                                                                                                                                                                                                               |

1  
2  
3  
4  
5  
6  
7  
8  
9  
10  
11  
12  
13  
14  
15  
16  
17  
18  
19  
20  
21  
22  
23  
24  
25  
26  
27  
28  
29  
30  
31  
32  
33  
34  
35  
36  
37  
38  
39  
40  
41  
42  
43  
44  
45  
46  
47

|                 |                                                                                                                                                                                                                        |                                                                                                                                                                                                                                                                                                                                                                                                                                          |                                                                                                                                                                                                                                                                                                                                                                                                                                                                                                                                                                                                                                                                                                                                                                                                                                                                                                                                                                                                                                                                                                                                                                                                                                                          |
|-----------------|------------------------------------------------------------------------------------------------------------------------------------------------------------------------------------------------------------------------|------------------------------------------------------------------------------------------------------------------------------------------------------------------------------------------------------------------------------------------------------------------------------------------------------------------------------------------------------------------------------------------------------------------------------------------|----------------------------------------------------------------------------------------------------------------------------------------------------------------------------------------------------------------------------------------------------------------------------------------------------------------------------------------------------------------------------------------------------------------------------------------------------------------------------------------------------------------------------------------------------------------------------------------------------------------------------------------------------------------------------------------------------------------------------------------------------------------------------------------------------------------------------------------------------------------------------------------------------------------------------------------------------------------------------------------------------------------------------------------------------------------------------------------------------------------------------------------------------------------------------------------------------------------------------------------------------------|
|                 |                                                                                                                                                                                                                        | Wave 1-2: $\beta=0.030$ ,<br>Wave 2-3: $\beta= 0.068$                                                                                                                                                                                                                                                                                                                                                                                    | sectional studies that the occurrence of falls was related to social exclusion. [...] Older adults who have fallen more frequently might choose to avoid risky activities such as going outside of the home and engaging in social activities. This could lead to a discrepancy in desired and actual social engagement, which in turn results in more frequent experience of loneliness.”                                                                                                                                                                                                                                                                                                                                                                                                                                                                                                                                                                                                                                                                                                                                                                                                                                                               |
| Hajek, 2020[13] | n=8836<br><br>In total, 669 individuals changed fear of falling (FOF) status from wave 5 to wave 6. More specifically, while the onset of FOF occurred in 431 individuals, the end of FOF occurred in 238 individuals. | <b>Relationship between fear of falling and loneliness</b> (Bude and Lantermann scale)<br><br><b>Onset of FOF</b><br>$\beta=0.02$ , SE=0.02, p=NR<br><b>End of FOF</b><br>$\beta= -0.06$ , SE=0.03, p<0.05<br><br><b>Relationship between fear of falling and social isolation</b> (De Jong Gierveld Loneliness Scale)<br><br><b>Onset of FOF</b><br>$\beta=0.06$ , SE=0.03, p<0.1<br><b>End of FOF</b><br>$\beta= 0.01$ , SE=0.04, p=NR | “The end of FOF was associated with reduced depressive symptoms ( $\beta = -1.08$ , $P < .05$ ), decreased loneliness scores ( $\beta = -0.06$ , $P < .05$ ), as well as decreased negative affect ( $\beta = -0.07$ , $P < .05$ ).<br>We assume that the end of FOF has the potential to mark a decisive turning point in life for individuals who scored high in these adverse conditions (severe depressive symptoms, high loneliness, or frequent negative emotions) when they had FOF.”<br><br>“The end of FOF was associated with decreases in negative psychosocial outcome measures (depressive symptoms, negative affect, and loneliness). However, and in contrast to the other negative psychosocial outcome measures, it is quite puzzling why the end of FOF was not associated with decreases in social isolation. A possible explanation may be that even a major life event, such as the end of FOF, does not have the power to reduce social isolation because feelings of isolation may remain largely stable over the years among middle-aged and older adults with FOF. Thus, individuals developing feelings of social isolation caused by FOF, several years ago, may have difficulties in overcoming these feelings of isolation” |

## Appendix 6: Cross-sectional studies reporting on falls and social isolation/loneliness (n=11)

| Author, Year        | Sample | Results                                                                                                                                                                                                                                                                                                                            | Text description/ interpretation of findings                                                                                                                                                                                                                                                                                                                                                                                                                                                                                                                                                                                                                                                                                                                                                                                                                                                                                                                                                                                                                                                                                                                                                                                                                                                                                          |
|---------------------|--------|------------------------------------------------------------------------------------------------------------------------------------------------------------------------------------------------------------------------------------------------------------------------------------------------------------------------------------|---------------------------------------------------------------------------------------------------------------------------------------------------------------------------------------------------------------------------------------------------------------------------------------------------------------------------------------------------------------------------------------------------------------------------------------------------------------------------------------------------------------------------------------------------------------------------------------------------------------------------------------------------------------------------------------------------------------------------------------------------------------------------------------------------------------------------------------------------------------------------------------------------------------------------------------------------------------------------------------------------------------------------------------------------------------------------------------------------------------------------------------------------------------------------------------------------------------------------------------------------------------------------------------------------------------------------------------|
| Finn, 2001[14]      | n=49   | <p><b>Social Resources</b><br/>(OARS Social Support Scale)</p> <p><u>Fallers (n=25)</u><br/>Mean: 2.4 (SD, 1)</p> <p><u>Non-Fallers (n=24)</u><br/>Mean: 2.0 (SD, 0.78)</p> <p>p = 0.59</p>                                                                                                                                        | <p>“The data from the present study supports the conclusion that the social resources of nursing home residents are the same, regardless of a history of falls that does not change their level of previous functioning. Most nursing home residents are already in a position where they have to rely on others to come to them for visits, outings, etc.. Unlike many community-based elderly individuals most nursing home residents do not have the means or capabilities to visit others who are not in their immediate environment. Therefore, regardless of fall-history the social resources available to nursing home residents is dependent on others.”</p>                                                                                                                                                                                                                                                                                                                                                                                                                                                                                                                                                                                                                                                                 |
| Stel, 2004[2]       | n=204  | <p><b>Relationship between falls inside and decline in social activities because of a fall</b></p> <p>OR: 2.6 (95% CI: 1.1-6.5); p&lt;0.05</p>                                                                                                                                                                                     | <p>“A decline in social activities after falling was significantly associated with falls inside. The current study shows that falls could also have consequences on the level of functioning in older people: respondents reported a decline in functional status (35.3%), a decline in social activities outside the house (16.7%) and physical activities (15.2%) as a direct consequence of the last fall.”</p>                                                                                                                                                                                                                                                                                                                                                                                                                                                                                                                                                                                                                                                                                                                                                                                                                                                                                                                    |
| Nicholson, 2005[15] | n=68   | <p><b>Relationship between injurious falls and social isolation</b><br/>(Lubben Social Network Scale)</p> <p><b>Social isolation</b><br/><math>\rho = -0.4</math>; p&lt;0.05</p> <p><b>Female</b><br/><math>\rho = -0.5</math>; p=0.01</p> <p><b>Family Sub Scale of Social Isolation</b><br/><math>\rho = -0.2</math>; p=0.12</p> | <p>“Results suggest that there is a strong positive relationship between injurious falls and social isolation. Results from this sample suggest that there is an association between lower scores of the LSNS and higher number of injurious falls, which means that increased injurious falls are related to increased social isolation. In the findings for this sample it appears that there may be some direct link between injurious falls and social isolation.</p> <p>Gender appeared to play a role when examining H4. Males as a group did not show a significant relationship between number of injurious falls and social isolation. The relationship for females as a group was positive and significant. This female sample showed a high Pearson’s correlation coefficient (see Table 4). This suggests that injurious falls may trigger some direct link to social isolation in females.”</p> <p>“When examining the family subscale of the LSNS, there was no correlation between injurious falls and social isolation (see Table 3). It is possible that as the participant continues to have injurious falls and becomes less likely to leave the house due to a fear of future injurious falls, he/she will eventually become socially isolated. This is not necessarily the case when families are involved.”</p> |



1  
2  
3  
4  
5  
6  
7  
8  
9  
10  
11  
12  
13  
14  
15  
16  
17  
18  
19  
20  
21  
22  
23  
24  
25  
26  
27  
28  
29  
30  
31  
32  
33  
34  
35  
36  
37  
38  
39  
40  
41  
42  
43  
44  
45  
46  
47

|                        |        |                                                                                                                                                                                                                                                                                                                                                                                     |                                                                                                                                                                                                                                                                                                                                                                                                                                                                                                                                                                                                                                                                                                                                                 |
|------------------------|--------|-------------------------------------------------------------------------------------------------------------------------------------------------------------------------------------------------------------------------------------------------------------------------------------------------------------------------------------------------------------------------------------|-------------------------------------------------------------------------------------------------------------------------------------------------------------------------------------------------------------------------------------------------------------------------------------------------------------------------------------------------------------------------------------------------------------------------------------------------------------------------------------------------------------------------------------------------------------------------------------------------------------------------------------------------------------------------------------------------------------------------------------------------|
|                        |        | <p><b>Friend Sub Scale of Social Isolation</b><br/> <math>\rho = -0.43</math>; <math>p &lt; 0.05</math></p>                                                                                                                                                                                                                                                                         | <p>“On the other hand, in the case of the friends subscale, there was a strong correlation between injurious falls and social isolation, such that a greater number of injurious falls was associated with a greater degree of social isolation. A possible explanation for this may be the opposite of the phenomenon with family and social isolation. The participant who has increasing injurious falls may become more likely to stay in the house thus losing contact with friends. Friends of the participants tend to be around the same age as the participant and are less likely to increase the amount of visits to the participant to make up for the lack of contact the participant suffers as a result of being homebound.”</p> |
| Iliffe, 2007[16]       | n=3139 | <p><b>Falls and social isolation</b><br/> (Lubben social network scale)<br/> <u>Socially isolated (n=368)</u><br/> 13.6% reported multiple falls in the past 12 months<br/> <u>Not socially isolated (n=2133)</u> 10.7% reported multiple falls in the past 12 months<br/> <math>p = 0.11</math></p>                                                                                | <p>Multivariate analysis taking into account all statistically significant associations shows a different pattern. The risk of social isolation appears to be associated with depressed mood and living alone, while male sex, memory impairment and perceived poor health may be weakly associated. For the other factors [multiple falls] listed in the second hypothesis, no significant associations in bivariate or multivariate analyses were found.</p>                                                                                                                                                                                                                                                                                  |
| Van Lankveld, 2011[17] | n=154  | <p><b>Relationship of falls with loneliness</b><br/> (De Jong Gierveld Loneliness scale)<br/> Correlation coefficient = 0.14<br/> <math>p = \text{not significant}</math></p>                                                                                                                                                                                                       | <p>“Health status indicators were unrelated to falls and cognitive functioning, and showed low to moderate relations with the remaining health hazards.”</p>                                                                                                                                                                                                                                                                                                                                                                                                                                                                                                                                                                                    |
| Schnittger, 2012[18]   | n=579  | <p><b>Association between history of falls and pathways of loneliness</b></p> <p><b>Emotional loneliness</b><br/> (de Jong-Gierveld Loneliness Scale)<br/> Correlation coefficient=0.134<br/> <math>p &lt; 0.003</math></p> <p><b>Social loneliness</b><br/> (de Jong-Gierveld Loneliness Scale)<br/> Correlation coefficient=0.09<br/> <math>p = \text{not significant}</math></p> | <p>“Interestingly, social support was the only outcome in which a biological variable, falls history, emerged in the final model; this may indicate the relative importance of health factors compared to psychosocial factors in the loneliness models”</p>                                                                                                                                                                                                                                                                                                                                                                                                                                                                                    |



|                  |                                                                                                                |                                                                                                                                                                                                                                                                                                                                 |                                                                                                                                                                                                                                                                                                                                                                                                                                                                                                                                                                                               |
|------------------|----------------------------------------------------------------------------------------------------------------|---------------------------------------------------------------------------------------------------------------------------------------------------------------------------------------------------------------------------------------------------------------------------------------------------------------------------------|-----------------------------------------------------------------------------------------------------------------------------------------------------------------------------------------------------------------------------------------------------------------------------------------------------------------------------------------------------------------------------------------------------------------------------------------------------------------------------------------------------------------------------------------------------------------------------------------------|
|                  |                                                                                                                | <p><b>Social support</b><br/>(Lubben Social Network Scale)<br/>Correlation coefficient= -0.247<br/>p&lt;0.003</p>                                                                                                                                                                                                               |                                                                                                                                                                                                                                                                                                                                                                                                                                                                                                                                                                                               |
| Quach, 2016[19]  | <p>n=8464</p> <p>No falls group (n=5249)<br/>One fall group (n=1352)<br/>At least two falls group (n=1863)</p> | <p><b>Social Relationship Index [mean (SD)]</b></p> <p>No falls: 3.34 (1.32)<br/>One fall: 3.24 (1.35)<br/>At least two falls: 3.08 (1.35)<br/>p&lt;0.0001</p> <p><i>Note: this is a cohort study, but the outcomes relevant to our review question are from a cross-sectional survey given to participants at baseline</i></p> | <p>“Respondents who fell had a higher prevalence of clinically significant depression symptoms, were more often not married, had fewer good friends living in their neighborhood, were less likely to attend religious services or to be a volunteer, and were less likely to have perceived support from friends or relatives, when needed. The average score of the social relationship index for fallers (3.08 or 3.24 for respondents with at least 2 falls or one fall respectively) tended to be lower than for respondents who did not fall (3.34 score of the index, p&lt;.0001)”</p> |
| Hajek, 2017[20]  | <p>n=7808</p>                                                                                                  | <p><b>Variables associated with history of falls</b></p> <p><b>Social exclusion</b><br/>(Bude and Lantermann scale)<br/><math>\beta = 0.08</math>; SE, -0.02; p&lt;0.001</p> <p><b>Loneliness</b><br/>(De Jong Gierveld Loneliness Scale)<br/><math>\beta = 0.08</math>; SE, -0.02; p&lt;0.001</p>                              | <p>Controlling for potential confounders, linear regression analysis showed that reporting a fall in the previous 12 months was associated with higher social exclusion scores (<math>\beta = .08</math>, p &lt; .001), and higher loneliness scores (<math>\beta = .08</math>, p &lt; .001). Contrarily, reporting a fall in the preceding 12 months was not associated with the number of important people in regular contact.</p>                                                                                                                                                          |
| Robins, 2018[21] | <p>n=245</p>                                                                                                   | <p><b>Relationship between falls and social isolation</b><br/>(Friendship Scale for social isolation)<br/>OR 1.03 (95% CI: 0.66-1.62);<br/>p=0.9</p>                                                                                                                                                                            | <p>No statistically significant association reported between experiencing a fall in the past 12 months and social isolation.</p>                                                                                                                                                                                                                                                                                                                                                                                                                                                              |
| Faria, 2020[22]  | <p>n=48</p>                                                                                                    | <p><b>Relationship between falls and loneliness</b><br/>(UCLA scale)<br/>p=0.384</p>                                                                                                                                                                                                                                            | <p>No statistically significant association reported between experiencing a fall in the past 6 months and loneliness</p>                                                                                                                                                                                                                                                                                                                                                                                                                                                                      |

1  
2  
3  
4  
5  
6  
7  
8  
9  
10  
11  
12  
13  
14  
15  
16  
17  
18  
19  
20  
21  
22  
23  
24  
25  
26  
27  
28  
29  
30  
31  
32  
33  
34  
35  
36  
37  
38  
39  
40  
41  
42  
43  
44  
45  
46  
47

|                           |       |                                                                                                                                                                                                                                             |                                                                                                                                                                                                                                                                                                                                                                                                                                                                                                                                                                                                                                                                                                                                                                                                           |
|---------------------------|-------|---------------------------------------------------------------------------------------------------------------------------------------------------------------------------------------------------------------------------------------------|-----------------------------------------------------------------------------------------------------------------------------------------------------------------------------------------------------------------------------------------------------------------------------------------------------------------------------------------------------------------------------------------------------------------------------------------------------------------------------------------------------------------------------------------------------------------------------------------------------------------------------------------------------------------------------------------------------------------------------------------------------------------------------------------------------------|
| Vanden Wyngaert, 2020[23] | n=113 | <p><b>Variables associated with risk of falls</b></p> <p><b>Ability to participate in social roles and activities</b><br/>(PROMIS questionnaire)<br/>R<sup>2</sup>=0.11; p=0.01</p> <p><b>Depression</b><br/>R<sup>2</sup>=0.08; p=0.01</p> | <p>“Regarding the PROMIS questionnaire, low associations were found between measures of the risk of falls and the appreciation of participation in social roles and activities on the one hand (R2 = 0.11), and depression on the other (R2 = 0.08)”</p> <p>“Remarkably, the risk of falls on itself was identified as a determinant of difficulties on psycho-social well-being (i.e. depression and social isolation) and of objective health utility [...]</p> <p>As such, falls and an increased risk of falls can deter subjects to continue their outdoor social activities, resulting in changes in means and location of social contact to less stimulating activities (e.g. a phone call rather than a rendezvous point), promoting the risk of impairments in mental health and depression”</p> |
|---------------------------|-------|---------------------------------------------------------------------------------------------------------------------------------------------------------------------------------------------------------------------------------------------|-----------------------------------------------------------------------------------------------------------------------------------------------------------------------------------------------------------------------------------------------------------------------------------------------------------------------------------------------------------------------------------------------------------------------------------------------------------------------------------------------------------------------------------------------------------------------------------------------------------------------------------------------------------------------------------------------------------------------------------------------------------------------------------------------------------|

For peer review only

## Appendix 7: Cross-sectional studies reporting on fear of falling and activity restriction due to fear of falling (n= 15)

| Author, Year      | Sample | Results                                                                                                                                                                                                                                                                                                                                                                                                                                                                                                                             | Text description/ interpretation of findings                                                                                                                                                                                                                                                                                                                                                                                                                                                                                                                                                                                                                                                                                                                                                                                                                                                                                                                                                                                                                                                                                                          |
|-------------------|--------|-------------------------------------------------------------------------------------------------------------------------------------------------------------------------------------------------------------------------------------------------------------------------------------------------------------------------------------------------------------------------------------------------------------------------------------------------------------------------------------------------------------------------------------|-------------------------------------------------------------------------------------------------------------------------------------------------------------------------------------------------------------------------------------------------------------------------------------------------------------------------------------------------------------------------------------------------------------------------------------------------------------------------------------------------------------------------------------------------------------------------------------------------------------------------------------------------------------------------------------------------------------------------------------------------------------------------------------------------------------------------------------------------------------------------------------------------------------------------------------------------------------------------------------------------------------------------------------------------------------------------------------------------------------------------------------------------------|
| Tinetti, 1994[24] | n=1103 | <p><b>Fear of falling</b><br/>(Falls Efficacy Scale – modified so low score corresponds with low confidence or greater fear)</p> <p><u>Fallers</u><br/>Mean, 79.8 (SD 23.4)</p> <p><u>Non-fallers</u><br/>Mean, 88.1 (SD 17.9)</p> <p>p &lt; .0001</p> <p><b>Activity restriction because of fear of falling</b><br/>Fallers = 24%<br/>Non-fallers =15%<br/>chi-square= 13.1; p &lt; 0.001</p>                                                                                                                                      | In order to examine the impact of recent falls, we also determined the proportion of subjects reporting fear and the mean fall-related efficacy scores separately for subjects who did and did not experience a fall in the year prior to the interview. The proportion of subjects reporting a decrease in activity because of fear of falling was 24% among fallers vs 15% among non-fallers (chi-square= 13.1; p < .001). The mean fall-related efficacy scores were 79.8 (SD 23.4) and 88.1 (SD 17.9) among fallers and non-fallers, respectively (p < .0001).                                                                                                                                                                                                                                                                                                                                                                                                                                                                                                                                                                                    |
| Howland, 1998[25] | n=266  | <p><b>Relationship between falls and fear of falling</b><br/>OR: 2.498 (95% CI: 1.013-6.159); p=0.05</p> <p><b>Relationship between falls and activity curtailment among those afraid of falling</b><br/>OR: 1.094 (95% CI: 0.376-3.177); p=0.869</p> <p><b>Relationship between social support and activity curtailment among those afraid of falling</b><br/>(Social Support Scale)<br/>OR: 1.574 (95% CI: 1.082-2.290); p=0.018<br/><i>Note: Here a higher social support score indicates lower levels of social support</i></p> | <p>“The contribution of personal falls experience to fear of falling was apparent. Those who suffered a previous fall were more likely to have a fear of falling.”</p> <p>“Surprisingly, neither the degree of fear of falling nor the experience of falls was associated with activity restriction. This finding suggests that activity curtailment is not just associated with extreme levels of fear. The presence of social support was, however, important. Those who could rely on others or talk with friends about falling were least likely to report activity curtailment. Thus, support of family and friends may be an important prerequisite for continuing to remain active even in the face of fear of falling. This support may serve as a buffer to the potentially debilitating consequences of fear of falling. It is possible this support is manifested as encouragement for remaining active.”</p> <p>“Those who curtailed activities [...] did not differ with respect to social integration but were significantly (p = .024) less likely to be able to rely on friends or relatives in times of crisis (social support)”</p> |
| Murphy, 2002[1]   | n=1064 | <b>Variables independently associated with activity restriction in participants with fear of falling</b>                                                                                                                                                                                                                                                                                                                                                                                                                            | “We found that a history of an injurious fall within the past year, slow timed physical performance, two or more chronic conditions, and                                                                                                                                                                                                                                                                                                                                                                                                                                                                                                                                                                                                                                                                                                                                                                                                                                                                                                                                                                                                              |

|                       |        |                                                                                                                                                                                                                                                                                                                                          |                                                                                                                                                                                                                                                                                                                                                                                                                                                                                                                                                                            |
|-----------------------|--------|------------------------------------------------------------------------------------------------------------------------------------------------------------------------------------------------------------------------------------------------------------------------------------------------------------------------------------------|----------------------------------------------------------------------------------------------------------------------------------------------------------------------------------------------------------------------------------------------------------------------------------------------------------------------------------------------------------------------------------------------------------------------------------------------------------------------------------------------------------------------------------------------------------------------------|
|                       |        | <p><i>Injurious fall</i><br/>Adjusted relative risk (ARR): 1.36 (95% CI, 1.11-1.66); p=0.003</p> <p><i>Two or more chronic conditions</i><br/>ARR: 1.34 (95% CI, 1.08-1.65); p=0.007</p> <p><i>Slow-timed physical performance</i><br/>ARR: 1.44 (95% CI, 1.18-1.75); p=0.0004</p>                                                       | <p>depressive symptoms were all independently associated with activity restriction.”</p>                                                                                                                                                                                                                                                                                                                                                                                                                                                                                   |
| Apikomonkon, 2003[26] | n=546  | <p><b>Relationship between falls and activity restriction</b><br/>Chi-square=5.49, p&lt;0.05</p> <p><b>Relationship between fear of falling and activity restriction</b><br/>Chi-square=23.27, p&lt;0.001</p>                                                                                                                            | <p>“Compared with non-fallers, the older persons with falls experiences were more likely to have activity restriction (25% vs 16%). The Chi-square test indicated that fall history was associated with activity restriction measured by dichotomous question.”</p> <p>“Older people with FOF were more likely to have activity restriction (26% vs 10%). The FOF using the SAFE Thai version was significantly associated with activity restriction as measured by dichotomous question.”</p>                                                                             |
| Gagnon, 2005[3]       | n=105  | <p><b>Variables associated with fear of falling</b><br/>(Comparing subjects with no/slight fear and subjects with moderate/severe fear)</p> <p><b>Social support</b><br/>(confiding-relationships component of the Bedford Life Events and Difficulties Schedule modified for elderly subjects)</p> <p>Wald chi-square= 3.77; p=0.05</p> | <p>“The following secondary independent variables were significantly associated with categorical fear of falling: dizziness (Wald chi-square 6.58; p 0.01), total number of medications (Wald chi-square 5.40; p 0.02), and social support (Wald chi-square 3.77; p 0.05). (Note: Higher scores mean less support.)”</p>                                                                                                                                                                                                                                                   |
| Zijlstra, 2007[27]    | n=4376 | <p><b>Variables significantly associated with avoidance of activity due to fear of falling</b></p> <p><b>Multiple falls in past 6 months</b><br/>OR: 1.97 (95% CI, 1.52-2.54)</p>                                                                                                                                                        | <p>“When fear of falling was added as an additional variable (model 3; Table 3), odds ratios of all variables that showed significance in model 2 decreased. Nevertheless, the association for the highest age group (≥80 years), fair and poor perceived general health and multiple falls with avoidance of activities remained statistically significant. Our findings regarding avoidance of activity remained fairly similar when fear of falling was entered into the logistic model. Although sometimes, often and very often experiencing fear of falling were</p> |

|                  |        |                                                                                                                                                                                                                                                                                                                                                                                                                                                                                                           |                                                                                                                                                                                                                                                                                                                                                                                                                                                                                                                                                                                                                                                                                                                                                                                                                                                                                                                                                                                                                                                                                                                                                                                                                                                                                                |
|------------------|--------|-----------------------------------------------------------------------------------------------------------------------------------------------------------------------------------------------------------------------------------------------------------------------------------------------------------------------------------------------------------------------------------------------------------------------------------------------------------------------------------------------------------|------------------------------------------------------------------------------------------------------------------------------------------------------------------------------------------------------------------------------------------------------------------------------------------------------------------------------------------------------------------------------------------------------------------------------------------------------------------------------------------------------------------------------------------------------------------------------------------------------------------------------------------------------------------------------------------------------------------------------------------------------------------------------------------------------------------------------------------------------------------------------------------------------------------------------------------------------------------------------------------------------------------------------------------------------------------------------------------------------------------------------------------------------------------------------------------------------------------------------------------------------------------------------------------------|
|                  |        | <p><b>Aged 80 years or older</b><br/>OR: 1.56 (95% CI, 1.24-1.95)</p> <p><b>Fair perceived general health</b><br/>OR: 2.92 (95% CI, 2.43-3.52)</p> <p><b>Poor perceived general health</b><br/>OR: 5.7 (95% CI, 3.57-9.12)</p>                                                                                                                                                                                                                                                                            | <p>strongly associated with avoidance of activity, higher age (<math>\geq 80</math> years), fair and poor perceived health and multiple falls remained independently associated with avoidance of activity in community-living older people. This implies that interventions aimed at reducing avoidance of activity should not focus on fear of falling alone, but on other modifiable factors, like falls, as well”</p>                                                                                                                                                                                                                                                                                                                                                                                                                                                                                                                                                                                                                                                                                                                                                                                                                                                                      |
| Iliffe, 2007[16] | n=3139 | <p><b>Relationship between fear of falling and social isolation</b><br/>(Lubben Social Network Scale)</p> <p>OR: 1.21 (95% CI, 0.88-1.65)</p>                                                                                                                                                                                                                                                                                                                                                             | <p>Multivariate analysis taking into account all statistically significant associations shows a different pattern. The risk of social isolation appears to be associated with depressed mood and living alone, while male sex, memory impairment and perceived poor health may be weakly associated. For the other factors [(fear of falling)] listed in the second hypothesis, no significant associations in bivariate or multivariate analyses were found.</p>                                                                                                                                                                                                                                                                                                                                                                                                                                                                                                                                                                                                                                                                                                                                                                                                                              |
| Curcio, 2009[4]  | n=1668 | <p><b>Variables associated with activity restriction related to fear of falling</b></p> <p><b>At least 1 fall in past year</b><br/>OR: 1.48 (95% CI, 1.18-1.86); p=0.001</p> <p><b>Low social participation</b><br/>OR: 1.52 (95% CI, 1.20-1.92); p&lt;0.01</p> <p><b>Poor perceived health</b><br/>OR: 1.38 (95% CI, 1.06-1.79)</p> <p><b>Difficulties in activities of daily living</b><br/>OR: 1.65 (95% CI, 1.16-2.32)</p> <p><b>Decreased physical activity</b><br/>OR: 1.35 (95% CI, 1.06-1.70)</p> | <p>“Those who had activity restriction related to fear of falling were significantly more likely to have had a fall within the past year, with a trend to suffer recurrent falls and injurious falls”</p> <p>“Table 3 shows the bivariate relationships between activity restriction related to fear of falling and psychosocial factors. Activity restriction related to fear of falling had a strong bivariate association with poor perceived health, depression, low social participation, and poor life satisfaction.”</p> <p>“A second model was then constructed with the psychosocial associated factors and other clinical and functional covariates (see Table 4). After adjustment, functional and clinical factors remained independently associated with activity restriction related to fear of falling. Only depression and poor perceived health variables emerged as independent factors.”</p> <p>“logistic regression analyses for activity restriction related to fear of falling. In the first model, 19 demographic, functional, and health-related variables with p values less than .05 derived from the bivariate analysis were entered into the logistic regression as independent variables. Difficulties in ADL, decreased physical activity, polypharmacy, and</p> |

1  
2  
3  
4  
5  
6  
7  
8  
9  
10  
11  
12  
13  
14  
15  
16  
17  
18  
19  
20  
21  
22  
23  
24  
25  
26  
27  
28  
29  
30  
31  
32  
33  
34  
35  
36  
37  
38  
39  
40  
41  
42  
43  
44  
45  
46  
47

|                |       |                                                                                                                                                                                                                                                                                                                                                                                                                                                        |                                                                                                                                                                                                                                                                                                                                                                                                                                                                                                                                                                                                                                                                                                                                                                                                                                                                                                                                                                                                                                                                                                                                                                                                                                                                                                                                                                                                                                                                                                                                                                                                                                                                                                                                                                                                                                                                 |
|----------------|-------|--------------------------------------------------------------------------------------------------------------------------------------------------------------------------------------------------------------------------------------------------------------------------------------------------------------------------------------------------------------------------------------------------------------------------------------------------------|-----------------------------------------------------------------------------------------------------------------------------------------------------------------------------------------------------------------------------------------------------------------------------------------------------------------------------------------------------------------------------------------------------------------------------------------------------------------------------------------------------------------------------------------------------------------------------------------------------------------------------------------------------------------------------------------------------------------------------------------------------------------------------------------------------------------------------------------------------------------------------------------------------------------------------------------------------------------------------------------------------------------------------------------------------------------------------------------------------------------------------------------------------------------------------------------------------------------------------------------------------------------------------------------------------------------------------------------------------------------------------------------------------------------------------------------------------------------------------------------------------------------------------------------------------------------------------------------------------------------------------------------------------------------------------------------------------------------------------------------------------------------------------------------------------------------------------------------------------------------|
|                |       | <p><b>Polypharmacy</b><br/>OR: 1.56 (95% CI, 1.14-2.14)</p> <p><b>Below poverty level</b><br/>OR: 1.32 (95% CI, 1.05-1.65)</p>                                                                                                                                                                                                                                                                                                                         | <p>extreme poverty were independently associated with activity restriction related to fear of falling. A second model was then constructed with the psychosocial associated factors and other clinical and functional covariates (see Table 4). After adjustment, functional and clinical factors remained independently associated with activity restriction related to fear of falling.”</p>                                                                                                                                                                                                                                                                                                                                                                                                                                                                                                                                                                                                                                                                                                                                                                                                                                                                                                                                                                                                                                                                                                                                                                                                                                                                                                                                                                                                                                                                  |
| Kara, 2009[28] | n=47  | <p><b>Relationship between fear of falling and loneliness</b><br/>(Philadelphia Geriatric Center Morale Scale)<br/><math>\rho = 0.258</math>; <math>p = \text{Not significant}</math></p>                                                                                                                                                                                                                                                              | <p>When the correlation between the fear of falling and the subscales of the Philadelphia Geriatric Center Morale Scale is examined, no correlations were found (Table 5).</p>                                                                                                                                                                                                                                                                                                                                                                                                                                                                                                                                                                                                                                                                                                                                                                                                                                                                                                                                                                                                                                                                                                                                                                                                                                                                                                                                                                                                                                                                                                                                                                                                                                                                                  |
| Dias, 2011[5]  | n=113 | <p><b>Variables associated with activity restriction due to fear of falling</b><br/>(compared to no FOF or FOF alone)</p> <p><b>Fear of falling intensity</b><br/>Mean 3.4 (SD, 0.9); <math>p &lt; 0.0</math></p> <p><b>Depression</b><br/>Chi-square=15.2, <math>p = 0.004</math></p> <p><b>Exhaustion</b><br/>Chi-square=9.2, <math>p = 0.01</math></p> <p><b>Participation in social activities</b><br/>Chi-square=10.4, <math>p = 0.016</math></p> | <p>“The three groups were statistically different in relation to FOF evaluated using the question about fear intensity. The group that reported FOF and activity restriction demonstrated higher levels of fear when compared with the other groups”</p> <p>“The variables that best discriminated the groups were depression, exhaustion and participation in social activities, demonstrated in the diagram (Figure 1). For the grouping obtained through the Chi-square Automatic Interaction Detection (CHAID) method, it may be observed that the first distinctive characteristic was depression, evaluated using GDS. Those with positive symptoms for depression showed 90% chance of restricting activities due to fear of falling.</p> <p>Additionally, the presence of depressive symptoms seems to modulate the factors that are associated with activity restriction due to fear of falling. A greater risk for depression has been associated with inadequate evaluation of coping self-efficacy in stressful events of life. It is worth noting that the participants of the present study who restricted activities by FOF showed lower self-efficacy in relation to the other participants. Thus, it is possible that elders with depressive symptoms perceive themselves less capable of performing certain tasks and, because of that, restrict their activities.</p> <p>Out of the elders that did not have depressive symptoms, those who had positive result for exhaustion of the frailty phenotype had 78% chance of restricting activities due to fear of falling.”</p> <p>“Out of the ones who did not show positive result for exhaustion, the other distinctive characteristic was participation in social activities. Those who stopped performing activities had 73% chance of restricting activities due to fear of falling.</p> |

|                           |        |                                                                                                                                                                                                                                                |                                                                                                                                                                                                                                                                                                                                                      |
|---------------------------|--------|------------------------------------------------------------------------------------------------------------------------------------------------------------------------------------------------------------------------------------------------|------------------------------------------------------------------------------------------------------------------------------------------------------------------------------------------------------------------------------------------------------------------------------------------------------------------------------------------------------|
|                           |        |                                                                                                                                                                                                                                                | Participation in social activities was the last discriminatory factor for the studied sample; however this variable did not show association with activity restriction in the bivariate analysis. It is possible that this difference in relation to the participation in social activities only occurs for a subgroup and not for the whole sample” |
| Mendes da Costa, 2012[29] | n=501  | <p><b>Relationship between activity restriction due to fear of falling and number of falls in past 12 months</b></p> <p>2 or more falls<br/>OR, 3.04 (95% CI, 1.70-5.42)</p> <p>1 fall<br/>OR, 1.33 (95% CI, 0.66-2.68)</p>                    | “activity restriction was increased significantly with age and with the number of falls within the past 12 months, affecting however one quarter of the subjects who did not fall. In the logistic regression model, these associations remained significant”                                                                                        |
| Choi, 2015[30]            | n=4247 | <p><b>Relationship between falls and fear-induced activity restriction</b></p> <p><u>Previous fall experiences</u><br/>OR, 2.12 [95% CI, 0.96-4.67]<br/>p=0.062</p> <p><u>Injurious falls</u><br/>OR, 3.03 [95% CI, 1.21-7.54]<br/>p=0.008</p> | Characteristics independently associated with fear-induced activity restriction were low socioeconomic status, cognitive impairment, difficulty with activities of daily living, and a history of injurious falls.                                                                                                                                   |
| Ferreira, 2018[31]        | n=7935 | <p><b>Relationship between fear of falling because of sidewalk defects and social participation</b></p> <p>OR 1.01 (95% CI: 0.99-1.04)</p>                                                                                                     | “As in the univariate analysis, the fear of falling because of defects in sidewalks and the perception of violence in the neighborhood were not associated with social participation.”                                                                                                                                                               |
| Petrinec, 2020[32]        | n=108  | <p><b>Relationship between fear of falling and social functioning</b></p> <p>(Medical Outcomes Study 36-item Short-Form General Health Survey)</p> <p><math>\beta = -0.29</math></p>                                                           | “Fear of falls was an independent predictor for role physical, physical functioning, and social functioning.”                                                                                                                                                                                                                                        |
| Merchant, 2020[7]         | n=493  | <p><b>Variables associated with fear of falling alone</b></p> <p><b>Number of falls</b></p>                                                                                                                                                    | “The multivariate logistics regression in Table 2 shows that female sex (OR = 3.54; 95% CI = 1.82–6.90), number of medications (OR = 1.28; 95% CI = 1.03–13.60), prefrail or frail (OR = 2.17; 95% CI = 1.26–3.73), depression (OR = 4.90; 95% CI = 1.06–22.67), and number of falls in the                                                          |

1  
2  
3  
4  
5  
6  
7  
8  
9  
10  
11  
12  
13  
14  
15  
16  
17  
18  
19  
20  
21  
22  
23  
24  
25  
26  
27  
28  
29  
30  
31  
32  
33  
34  
35  
36  
37  
38  
39  
40  
41  
42  
43  
44  
45  
46  
47

|  |  |                                                                                                                                                                                                                                                                                                                                                                                                                                                                           |                                                                                                                                                                                                                                                                                                                                                                                                                                                                                                                                                                                                                                                                                                                                                                                                                                                                                               |
|--|--|---------------------------------------------------------------------------------------------------------------------------------------------------------------------------------------------------------------------------------------------------------------------------------------------------------------------------------------------------------------------------------------------------------------------------------------------------------------------------|-----------------------------------------------------------------------------------------------------------------------------------------------------------------------------------------------------------------------------------------------------------------------------------------------------------------------------------------------------------------------------------------------------------------------------------------------------------------------------------------------------------------------------------------------------------------------------------------------------------------------------------------------------------------------------------------------------------------------------------------------------------------------------------------------------------------------------------------------------------------------------------------------|
|  |  | <p>OR, 2.13 ( 95% CI, 1.20–3.78)<br/>p&lt;0.05</p> <p><b>Social isolation</b><br/>OR, 0.99 ( 95% CI, 0.51–1.89)<br/>p=not significant</p> <p><b>Variables associated with fear of falling + fear-based activity restriction</b></p> <p><b>Number of falls</b><br/>OR, 1.4 ( 95% CI, 0.94–2.20)<br/>p=not significant</p> <p><b>Social isolation</b><br/>OR, 1.7 ( 95% CI, 0.82–3.55)<br/>p=not significant</p> <p><b>Sarcopenia</b><br/>OR, 8.13 (95% CI, 1.52–43.41)</p> | <p>past 12 months (OR = 2.13; 95% CI = 1.20–3.78) were significantly associated with FOF. Only sarcopenia (OR = 8.13; 95% CI = 1.52–43.41) and depression (OR = 5.17; 95% CI = 1.84–14.54) were significantly associated with FOF + FAR.”</p> <p>“<b>History of falling</b> is a well-known risk factor for FOF and/or FAR as persons who have experienced falls are more likely to develop fear. However, three-quarters of those with FOF and two-thirds of those with FOF + FAR had never experienced a fall in our study”</p> <p>“<b>Social isolation</b> is another factor that is poorly studied. In our study, one in three older adults with FOF + FAR were at risk of social isolation compared with one in five with no FOF”</p> <p>“Prefrailty, frailty, and <b>sarcopenia</b> have significant association with FOF and/or FAR in both univariate and multivariate analysis.”</p> |
|--|--|---------------------------------------------------------------------------------------------------------------------------------------------------------------------------------------------------------------------------------------------------------------------------------------------------------------------------------------------------------------------------------------------------------------------------------------------------------------------------|-----------------------------------------------------------------------------------------------------------------------------------------------------------------------------------------------------------------------------------------------------------------------------------------------------------------------------------------------------------------------------------------------------------------------------------------------------------------------------------------------------------------------------------------------------------------------------------------------------------------------------------------------------------------------------------------------------------------------------------------------------------------------------------------------------------------------------------------------------------------------------------------------|



## Appendix 8: Relevant findings from qualitative studies (n=7)

| Author, Year           | Qualitative analysis approach, and sample size | Results                                                                                                                                                                                                                                                                                                                                                                                                                                                                                                                                                                                                                                                                                                                                                                                                                                                                                                                                                                                                                                                                                                                                                                                                                                                                                                                                                                                                                                                                                                                                                                                                                                                                                                                                                                                                                                                                                                                                                                                                                                                                                                                                                                                                                                                               |
|------------------------|------------------------------------------------|-----------------------------------------------------------------------------------------------------------------------------------------------------------------------------------------------------------------------------------------------------------------------------------------------------------------------------------------------------------------------------------------------------------------------------------------------------------------------------------------------------------------------------------------------------------------------------------------------------------------------------------------------------------------------------------------------------------------------------------------------------------------------------------------------------------------------------------------------------------------------------------------------------------------------------------------------------------------------------------------------------------------------------------------------------------------------------------------------------------------------------------------------------------------------------------------------------------------------------------------------------------------------------------------------------------------------------------------------------------------------------------------------------------------------------------------------------------------------------------------------------------------------------------------------------------------------------------------------------------------------------------------------------------------------------------------------------------------------------------------------------------------------------------------------------------------------------------------------------------------------------------------------------------------------------------------------------------------------------------------------------------------------------------------------------------------------------------------------------------------------------------------------------------------------------------------------------------------------------------------------------------------------|
| Ward-Griffin, 2004[33] | Phenomenological approach<br><br>n=9           | <b><i>“Restricting activities was a second strategy identified by the participants, which involved avoiding certain social activities or/and physical environments. Participants used this strategy when they wanted to “play it safe” in times of inclement weather or in situations where ambulation might be difficult.</i></b> Precarious weather conditions seemed to heighten their awareness and fear of falling. As Sarah explained, “I do not fear falling, except around steps. They terrify me to death [along with] scaffolding around the town—that bothers me. Little kids on bicycles on the sidewalk— that bothers me. And I am restricted to the house when there’s fresh snow on the ground.” Similarly Wilfred stated, “When it’s really, really icy, and I don’t have to go out, I don’t drive the car. I don’t go out either.””                                                                                                                                                                                                                                                                                                                                                                                                                                                                                                                                                                                                                                                                                                                                                                                                                                                                                                                                                                                                                                                                                                                                                                                                                                                                                                                                                                                                                  |
| Meric, 2007[34]        | Analysis approach not reported<br><br>n=22     | <b><i>“After having a falling experience, elderly individuals had behavioral changes, which decreased the competency of achieving daily life activities, such as staying away from the crowded environments, not going outside alone, acting very slowly, not able to do daily activities alone:</i></b><br>“... I can't go out anymore. I haven't been out alone for 2 years, there are always people next to me.” (75; woman).<br>“... I take my man's arm on the street, I can't get out much in case I fall into the street” (77; woman).””                                                                                                                                                                                                                                                                                                                                                                                                                                                                                                                                                                                                                                                                                                                                                                                                                                                                                                                                                                                                                                                                                                                                                                                                                                                                                                                                                                                                                                                                                                                                                                                                                                                                                                                       |
| Schmid, 2009[35]       | Latent content analysis<br><br>n=42            | <b><i>“Quotes regarding the subsequent consequences of poststroke falls categorized into the following three themes: (1) limiting activity and participation, (2) increasing dependence, and (3) developing a fear of falling”</i></b><br><br><b><i>“Limiting activity: Because falling became common for some participants, talk about strategies for the prevention of future falls was common and emerged naturally during interviews. A significant consequence was the choice to limit everyday life activities at home and in the community to help manage and prevent falls”</i></b><br><br><b><i>“Increasing dependence: Participants discussed their dependence on assistive devices such as walkers, canes, and wheelchairs to reduce falls and feel secure in their environment. Some participants indicated use of the furniture, walls, or people as alternative assistive devices. Many discussed dependence on caregivers for maintaining balance and preventing falls. Participants easily became isolated because they were fearful to leave their home, and some were even fearful to move about their own home, becoming increasingly dependent.”</i></b><br><br><b><i>“Developing fear of falling: This initial experience of falling with stroke onset was a traumatic event that consequently resulted in participants expressing fear that future falls would mean having another stroke. They also discussed the subsequent development of fear of falling and the fear of being left on the floor for hours at a time. Participants described genuine fear of falling and fear about being hurt as well as the subsequent impact on function and independence. Some participants discussed falls becoming a frequent event and a common and pervasive concern; fear, worry, and concern became a daily consequence of poststroke falls. Some participants were fearful that they would fall while out in the community and addressed the embarrassment of a public fall. They were concerned about how they looked while walking around and seemed to be worried about the stigma related to falls and decreased mobility. Managing falls and fear of falling in everyday life became an important aspect of poststroke adjustment.”</i></b> |

|                       |                                                     |                                                                                                                                                                                                                                                                                                                                                                                                                                                                                                                                                                                                                                                                                                                                                                                                                                                                                                                                                                                                                                                                                                                                                                                                                                 |
|-----------------------|-----------------------------------------------------|---------------------------------------------------------------------------------------------------------------------------------------------------------------------------------------------------------------------------------------------------------------------------------------------------------------------------------------------------------------------------------------------------------------------------------------------------------------------------------------------------------------------------------------------------------------------------------------------------------------------------------------------------------------------------------------------------------------------------------------------------------------------------------------------------------------------------------------------------------------------------------------------------------------------------------------------------------------------------------------------------------------------------------------------------------------------------------------------------------------------------------------------------------------------------------------------------------------------------------|
| <p>Faes, 2010[36]</p> | <p>Grounded theory approach<br/><br/>n=10</p>       | <p><b><i>“Patients described social withdrawal and attributed this to their fear of falling and the loss of physical capabilities after falling. Patients recognised that they became (more) dependent on their caregiver after falling. One patient experienced social benefits from her fall, since she now receives more attention from her children”</i></b></p> <p>“P#1 I can’t travel anymore because of my limited mobility. I injured my leg in a fall.<br/>P#4 I stay at home more often and don’t visit my friends anymore. I am afraid to fall when I go out.<br/>P#5 My grandson is almost one year old. I still haven’t seen his room. His room is upstairs; I am too anxious to fall when climbing the stairs.”</p> <p><b><i>“Furthermore, our findings confirmed the consequences of falls in cognitively unimpaired older persons that are mentioned in the literature; these include a fear of falling and social withdrawal due to the fear of falling and physical limitations”</i></b></p>                                                                                                                                                                                                                  |
| <p>Chiu, 2011[37]</p> | <p>Focussed ethnographic approach<br/><br/>n=18</p> | <p>“Following their initial fall, it appeared that changes occurred in individuals’ independent living and use of informal support networks. While activities of daily living are continued either independently, or with help from —hourly maids during the rehabilitation period or for longer, <b><i>recreational activities usually were a second priority and were soon discontinued.</i></b> Mah-Jong, one of the most popular tile games among Chinese was mentioned by 12 respondents as a favourite pass time. Other social activities mentioned included Cantonese opera, volunteering within their communities, and dim sum with friends. <b><i>After a fall, these activities were interrupted for two main reasons: 1) lack of transportation means and 2) lower mobility capabilities. Feelings of loneliness arose as the respondents felt that they were cut off from their friends.”</i></b></p> <p>“Intuitive changes included modifications made to personal behaviours. <b><i>Avoidance behaviour was reported as an intuitive change. Specifically, fallers would avoid outdoor activities.</i></b> Other intuitive changes include being more careful ("taking care") when walking and slowing down.”</p> |
| <p>Host, 2011[38]</p> | <p>Phenomenographic approach<br/><br/>n=14</p>      | <p>“Others <b><i>stopped doing certain activities to avoid falling and they did not choose activities that made them scared and nervous and caused bodily pain. They thus perceived that physical activity was not good and therefore stopped the activity.</i></b> The families and the general practitioner (GP) supported their choices. Conversely, some felt that it was a loss if they had to stop activities they had enjoyed because it increased their risk of falling.”</p> <p><b><i>“Fall accidents had implications for older people’s identity and autonomy, and they could lead to social isolation.”</i></b></p> <p>“Conversely, social interaction in the context of participation in fall-prevention activities was not always welcomed because it placed the respondents in a context in which they did not like to see themselves.”</p> <p>“For others, <b><i>support from professionals was important in how they coped with falls</i></b> and their prevention. The GP was a good support when they needed knowledge about appropriate and applicable preventive activities.”</p>                                                                                                                          |
| <p>Xu, 2019[39]</p>   | <p>Thematic analysis<br/><br/>n=17</p>              | <p>Identified theme of restricted mobility and social participation.</p>                                                                                                                                                                                                                                                                                                                                                                                                                                                                                                                                                                                                                                                                                                                                                                                                                                                                                                                                                                                                                                                                                                                                                        |

1  
2  
3  
4  
5  
6  
7  
8  
9  
10  
11  
12  
13  
14  
15  
16  
17  
18  
19  
20  
21  
22  
23  
24  
25  
26  
27  
28  
29  
30  
31  
32  
33  
34  
35  
36  
37  
38  
39  
40  
41  
42  
43  
44  
45  
46  
47

|  |  |                                                                                                                                                                                                                                                                                                                                                                                                                                                                                                                                                                                                     |
|--|--|-----------------------------------------------------------------------------------------------------------------------------------------------------------------------------------------------------------------------------------------------------------------------------------------------------------------------------------------------------------------------------------------------------------------------------------------------------------------------------------------------------------------------------------------------------------------------------------------------------|
|  |  | <p><b><i>“Stroke participants felt that they were restricted after the fall, particularly around having reduced balance, and this affected their mobility functions and degree of social participation:</i></b></p> <p>I am getting worse, especially my balance. I used to walk for a short distance outside, but now I can’t. (S7)</p> <p>There was a big difference ... I used to walk with walking stick. But I have not been able to walk since that fall. (S8)</p> <p>Last time I could take public transport, go to [central area] and take a walk, now it’s too difficult for me. (S1)”</p> |
|--|--|-----------------------------------------------------------------------------------------------------------------------------------------------------------------------------------------------------------------------------------------------------------------------------------------------------------------------------------------------------------------------------------------------------------------------------------------------------------------------------------------------------------------------------------------------------------------------------------------------------|

For peer review only

## References

1. Murphy SL, Williams CS, Gill TM. Characteristics associated with fear of falling and activity restriction in community-living older persons. *J Am Geriatr Soc*. 2002 Mar;50(3):516-20.
2. Stel VS, Smit JH, Pluijm SM, Lips P. Consequences of falling in older men and women and risk factors for health service use and functional decline. *Age Ageing*. 2004 Jan;33(1):58-65.
3. Gagnon N, Flint AJ, Naglie G, Devins GM. Affective correlates of fear of falling in elderly persons. *Am J Geriatr Psychiatry*. 2005 Jan;13(1):7-14.
4. Curcio CL, Gomez F, Reyes-Ortiz CA. Activity restriction related to fear of falling among older people in the Colombian Andes mountains: are functional or psychosocial risk factors more important? *J Aging Health*. 2009 Jun;21(3):460-79.
5. Dias RC, Freire MT, Santos EG, Vieira RA, Dias JM, Perracini MR. Characteristics associated with activity restriction induced by fear of falling in community-dwelling elderly. *Rev Bras Fisioter*. 2011 Sep-Oct;15(5):406-13.
6. Nakaya N, Kogure M, Saito-Nakaya K, Tomata Y, Sone T, Kakizaki M, et al. The association between self-reported history of physical diseases and psychological distress in a community-dwelling Japanese population: the Ohsaki Cohort 2006 Study. *Eur J Public Health*. 2014 Feb;24(1):45-9.
7. Merchant RA, Chen MZ, Wong BLL, Ng SE, Shirooka H, Lim JY, et al. Relationship Between Fear of Falling, Fear-Related Activity Restriction, Frailty, and Sarcopenia. *J Am Geriatr Soc*. 2020 Nov;68(11):2602-8.
8. Vellas B, Cayla F, Bocquet H, de Pemille F, Albarede JL. Prospective study of restriction of activity in old people after falls. *Age Ageing*. 1987 May;16(3):189-93.
9. Tinetti ME, Williams CS. The effect of falls and fall injuries on functioning in community-dwelling older persons. *J Gerontol A Biol Sci Med Sci*. 1998 Mar;53(2):M112-9.
10. van der Meulen E, Zijlstra GA, Ambergen T, Kempen GI. Effect of fall-related concerns on physical, mental, and social function in community-dwelling older adults: a prospective cohort study. *J Am Geriatr Soc*. 2014 Dec;62(12):2333-8.
11. Pin S, Spini D. Impact of falling on social participation and social support trajectories in a middle-aged and elderly European sample. *SSM Popul Health*. 2016 Dec;2:382-9.
12. Yu K, Wu S, Jang Y, Chou CP, Wilber KH, Aranda MP, et al. Longitudinal Assessment of the Relationships Between Geriatric Conditions and Loneliness. *J Am Med Dir Assoc*. 2021 May;22(5):1107-13.e1.
13. Hajek A, König HH. What are the psychosocial consequences when fear of falling starts or ends? Evidence from an asymmetric fixed effects analysis based on longitudinal data from the general population. *Int J Geriatr Psychiatry*. 2020 Sep;35(9):1028-35.
14. Finn JM. The relationship between falls and fall-related efficacy, depression, and social resources: Adler School of Professional Psychology; 2001.
15. Nicholson Jr NR. The relationship between injurious falls, fear of falling, social isolation and depression. 2005.
16. Iliffe S, Kharicha K, Harari D, Swift C, Gillmann G, Stuck AE. Health risk appraisal in older people 2: the implications for clinicians and commissioners of social isolation risk in older people. *Br J Gen Pract*. 2007;57(537):277.

17. van Lankveld W, Fransen M, van den Hoogen F, den Broeder A. Age-related health hazards in old patients with first-time referral to a rheumatologist: a descriptive study. *Arthritis*. 2011;2011:823527.
18. Schnittger RI, Wherton J, Prendergast D, Lawlor BA. Risk factors and mediating pathways of loneliness and social support in community-dwelling older adults. *Aging Ment Health*. 2012;16(3):335-46.
19. Quach LT. Social Determinants of Falls: The Role of Social Support and Depression Among Community-Dwelling Older Adults. *Dissertation Abstracts International: Section B: The Sciences and Engineering 2018; 78(8-B(E))*:No Pagination Specified. 2016.
20. Hajek A, König HH. The association of falls with loneliness and social exclusion: evidence from the DEAS German Ageing Survey. *BMC Geriatr*. 2017 Sep 5;17(1):204.
21. Robins LM, Hill KD, Finch CF, Clemson L, Haines T. The association between physical activity and social isolation in community-dwelling older adults. *Aging Ment Health*. 2018 Feb;22(2):175-82.
22. Faria A, Martins M, Ribeiro O, Gomes BP, Fernandes C. Elderly residents in the community: gaining knowledge to support a rehabilitation nursing program. *Rev Bras Enferm*. 2020;73Suppl 3(Suppl 3):e20200194.
23. Vanden Wyngaert K, Van Craenenbroeck AH, Eloot S, Calders P, Celie B, Holvoet E, et al. Associations between the measures of physical function, risk of falls and the quality of life in haemodialysis patients: a cross-sectional study. *BMC Nephrol*. 2020 Jan 6;21(1):7.
24. Tinetti ME, Mendes de Leon CF, Doucette JT, Baker DI. Fear of falling and fall-related efficacy in relationship to functioning among community-living elders. *J Gerontol*. 1994 May;49(3):M140-7.
25. Howland J, Lachman ME, Peterson EW, Cote J, Kasten L, Jette A. Covariates of fear of falling and associated activity curtailment. *Gerontologist*. 1998 Oct;38(5):549-55.
26. Apikomkon H. Fear of falling and fall circumstances in Thailand: Curtin University; 2003.
27. Zijlstra GA, van Haastregt JC, van Eijk JT, van Rossum E, Stalenhoef PA, Kempen GI. Prevalence and correlates of fear of falling, and associated avoidance of activity in the general population of community-living older people. *Age Ageing*. 2007 May;36(3):304-9.
28. Kara B, Yildirim Y, Genc A, Ekizler S. Assessment of home environment and life satisfaction in geriatrics and relation to fear of falling. *Turk J Physiother Rehabil*. 2009;20(3):190-200.
29. Mendes da Costa E, Pepersack T, Godin I, Bantuelle M, Petit B, Levêque A. Fear of falling and associated activity restriction in older people. results of a cross-sectional study conducted in a Belgian town. *Arch Public Health*. 2012 Jan 3;70(1):1.
30. Choi K, Ko Y. Characteristics Associated With Fear of Falling and Activity Restriction in South Korean Older Adults. *J Aging Health*. 2015 Sep;27(6):1066-83.
31. Ferreira FR, César CC, Andrade FB, Souza Junior PRB, Lima-Costa MF, Proietti FA. Aspects of social participation and neighborhood perception: ELSI-Brazil. *Rev Saude Publica*. 2018 Oct 25;52Suppl 2(Suppl 2):18s.
32. Petrinc AB, Crowe ML, Flanagan SK, Baker J. Health-related Quality of Life of Older Women Religious: Negative Influence of Frailty. *West J Nurs Res*. 2020 Dec;42(12):1088-96.
33. Ward-Griffin C, Hobson S, Melles P, Kloseck M, Vandervoort A, Crilly R. Falls and Fear of Falling among Community-Dwelling Seniors: The Dynamic Tension between Exercising Precaution and Striving for Independence. *Canadian Journal on Aging / La Revue canadienne du vieillissement*. 2004;23(4):307-18.

- 1  
2  
3 34. Meric MO, Fahriye. A qualitative study on perception of elderly about fear of falling and it's impact on daily life. Turkish Journal of  
4 Geriatrics. 2007;10(1):19-23.  
5 35. Schmid AA, Rittman M. Consequences of poststroke falls: activity limitation, increased dependence, and the development of fear of  
6 falling. Am J Occup Ther. 2009 May-Jun;63(3):310-6.  
7 36. Faes MC, Reelick MF, Joosten-Weyn Banningh LW, Gier M, Esselink RA, Olde Rikkert MG. Qualitative study on the impact of falling in frail  
8 older persons and family caregivers: foundations for an intervention to prevent falls. Aging Ment Health. 2010 Sep;14(7):834-42.  
9 37. Chiu MW-Y. Psychosocial responses to falling in older Chinese immigrants living in the community 2010.  
10 38. Høst D, Hendriksen C, Borup I. Older people's perception of and coping with falling, and their motivation for fall-prevention  
11 programmes. Scand J Public Health. 2011 Nov;39(7):742-8.  
12 39. Xu T, O'Loughlin K, Clemson L, Lannin NA, Dean C, Koh G. Developing a falls prevention program for community-dwelling stroke survivors  
13 in Singapore: client and caregiver perspectives. Disabil Rehabil. 2019 May;41(9):1044-54.  
14  
15  
16  
17  
18  
19  
20  
21  
22  
23  
24  
25  
26  
27  
28  
29  
30  
31  
32  
33  
34  
35  
36  
37  
38  
39  
40  
41  
42  
43  
44  
45  
46  
47

## Preferred Reporting Items for Systematic reviews and Meta-Analyses extension for Scoping Reviews (PRISMA-ScR) Checklist

| SECTION                                               | ITEM | PRISMA-ScR CHECKLIST ITEM                                                                                                                                                                                                                                                                                  | REPORTED ON PAGE # |
|-------------------------------------------------------|------|------------------------------------------------------------------------------------------------------------------------------------------------------------------------------------------------------------------------------------------------------------------------------------------------------------|--------------------|
| <b>TITLE</b>                                          |      |                                                                                                                                                                                                                                                                                                            |                    |
| Title                                                 | 1    | Identify the report as a scoping review.                                                                                                                                                                                                                                                                   | 1                  |
| <b>ABSTRACT</b>                                       |      |                                                                                                                                                                                                                                                                                                            |                    |
| Structured summary                                    | 2    | Provide a structured summary that includes (as applicable): background, objectives, eligibility criteria, sources of evidence, charting methods, results, and conclusions that relate to the review questions and objectives.                                                                              | 3                  |
| <b>INTRODUCTION</b>                                   |      |                                                                                                                                                                                                                                                                                                            |                    |
| Rationale                                             | 3    | Describe the rationale for the review in the context of what is already known. Explain why the review questions/objectives lend themselves to a scoping review approach.                                                                                                                                   | 5                  |
| Objectives                                            | 4    | Provide an explicit statement of the questions and objectives being addressed with reference to their key elements (e.g., population or participants, concepts, and context) or other relevant key elements used to conceptualize the review questions and/or objectives.                                  | 5                  |
| <b>METHODS</b>                                        |      |                                                                                                                                                                                                                                                                                                            |                    |
| Protocol and registration                             | 5    | Indicate whether a review protocol exists; state if and where it can be accessed (e.g., a Web address); and if available, provide registration information, including the registration number.                                                                                                             | 5-6                |
| Eligibility criteria                                  | 6    | Specify characteristics of the sources of evidence used as eligibility criteria (e.g., years considered, language, and publication status), and provide a rationale.                                                                                                                                       | 6-7                |
| Information sources*                                  | 7    | Describe all information sources in the search (e.g., databases with dates of coverage and contact with authors to identify additional sources), as well as the date the most recent search was executed.                                                                                                  | 6                  |
| Search                                                | 8    | Present the full electronic search strategy for at least 1 database, including any limits used, such that it could be repeated.                                                                                                                                                                            | Appendix 1         |
| Selection of sources of evidence†                     | 9    | State the process for selecting sources of evidence (i.e., screening and eligibility) included in the scoping review.                                                                                                                                                                                      | 6                  |
| Data charting process‡                                | 10   | Describe the methods of charting data from the included sources of evidence (e.g., calibrated forms or forms that have been tested by the team before their use, and whether data charting was done independently or in duplicate) and any processes for obtaining and confirming data from investigators. | 8                  |
| Data items                                            | 11   | List and define all variables for which data were sought and any assumptions and simplifications made.                                                                                                                                                                                                     | 7-8                |
| Critical appraisal of individual sources of evidence§ | 12   | If done, provide a rationale for conducting a critical appraisal of included sources of evidence; describe the methods used and how this information was used in any data synthesis (if appropriate).                                                                                                      | N/A                |
| Synthesis of results                                  | 13   | Describe the methods of handling and summarizing the data that were charted.                                                                                                                                                                                                                               | Appendix 4-6       |

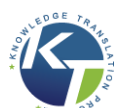



| SECTION                                       | ITEM | PRISMA-ScR CHECKLIST ITEM                                                                                                                                                                       | REPORTED ON PAGE #        |
|-----------------------------------------------|------|-------------------------------------------------------------------------------------------------------------------------------------------------------------------------------------------------|---------------------------|
| <b>RESULTS</b>                                |      |                                                                                                                                                                                                 |                           |
| Selection of sources of evidence              | 14   | Give numbers of sources of evidence screened, assessed for eligibility, and included in the review, with reasons for exclusions at each stage, ideally using a flow diagram.                    | 8; Figure 1               |
| Characteristics of sources of evidence        | 15   | For each source of evidence, present characteristics for which data were charted and provide the citations.                                                                                     | 8-11; Table 1; Appendix 7 |
| Critical appraisal within sources of evidence | 16   | If done, present data on critical appraisal of included sources of evidence (see item 12).                                                                                                      | N/A                       |
| Results of individual sources of evidence     | 17   | For each included source of evidence, present the relevant data that were charted that relate to the review questions and objectives.                                                           | 11-15                     |
| Synthesis of results                          | 18   | Summarize and/or present the charting results as they relate to the review questions and objectives.                                                                                            | Table 2                   |
| <b>DISCUSSION</b>                             |      |                                                                                                                                                                                                 |                           |
| Summary of evidence                           | 19   | Summarize the main results (including an overview of concepts, themes, and types of evidence available), link to the review questions and objectives, and consider the relevance to key groups. | 15-16                     |
| Limitations                                   | 20   | Discuss the limitations of the scoping review process.                                                                                                                                          | 17                        |
| Conclusions                                   | 21   | Provide a general interpretation of the results with respect to the review questions and objectives, as well as potential implications and/or next steps.                                       | 17                        |
| <b>FUNDING</b>                                |      |                                                                                                                                                                                                 |                           |
| Funding                                       | 22   | Describe sources of funding for the included sources of evidence, as well as sources of funding for the scoping review. Describe the role of the funders of the scoping review.                 | 18                        |

JBI = Joanna Briggs Institute; PRISMA-ScR = Preferred Reporting Items for Systematic reviews and Meta-Analyses extension for Scoping Reviews.

\* Where *sources of evidence* (see second footnote) are compiled from, such as bibliographic databases, social media platforms, and Web sites.

† A more inclusive/heterogeneous term used to account for the different types of evidence or data sources (e.g., quantitative and/or qualitative research, expert opinion, and policy documents) that may be eligible in a scoping review as opposed to only studies. This is not to be confused with *information sources* (see first footnote).

‡ The frameworks by Arksey and O'Malley (6) and Levac and colleagues (7) and the JBI guidance (4, 5) refer to the process of data extraction in a scoping review as data charting.

§ The process of systematically examining research evidence to assess its validity, results, and relevance before using it to inform a decision. This term is used for items 12 and 19 instead of "risk of bias" (which is more applicable to systematic reviews of interventions) to include and acknowledge the various sources of evidence that may be used in a scoping review (e.g., quantitative and/or qualitative research, expert opinion, and policy document).

From: Tricco AC, Lillie E, Zarin W, O'Brien KK, Colquhoun H, Levac D, et al. PRISMA Extension for Scoping Reviews (PRISMA-ScR): Checklist and Explanation. *Ann Intern Med.* 2018;169:467–473. doi: [10.7326/M18-0850](https://doi.org/10.7326/M18-0850).

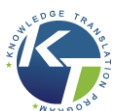

St. Michael's

Inspired Care.  
Inspiring Science.

For peer review only - <http://bmjopen.bmj.com/site/about/guidelines.xhtml>



# BMJ Open

## Global evidence on falls and subsequent social isolation in older adults: A scoping review

|                                 |                                                                                                                                                                                                                                                                                                                                                                                                                                                                                                                                                                                                                                                                                                                                                                                                                                                                                                                                                                                                                                                                                                                                                                                                                                                                                                                                                                                                                                                                                                   |
|---------------------------------|---------------------------------------------------------------------------------------------------------------------------------------------------------------------------------------------------------------------------------------------------------------------------------------------------------------------------------------------------------------------------------------------------------------------------------------------------------------------------------------------------------------------------------------------------------------------------------------------------------------------------------------------------------------------------------------------------------------------------------------------------------------------------------------------------------------------------------------------------------------------------------------------------------------------------------------------------------------------------------------------------------------------------------------------------------------------------------------------------------------------------------------------------------------------------------------------------------------------------------------------------------------------------------------------------------------------------------------------------------------------------------------------------------------------------------------------------------------------------------------------------|
| Journal:                        | <i>BMJ Open</i>                                                                                                                                                                                                                                                                                                                                                                                                                                                                                                                                                                                                                                                                                                                                                                                                                                                                                                                                                                                                                                                                                                                                                                                                                                                                                                                                                                                                                                                                                   |
| Manuscript ID                   | bmjopen-2022-062124.R2                                                                                                                                                                                                                                                                                                                                                                                                                                                                                                                                                                                                                                                                                                                                                                                                                                                                                                                                                                                                                                                                                                                                                                                                                                                                                                                                                                                                                                                                            |
| Article Type:                   | Original research                                                                                                                                                                                                                                                                                                                                                                                                                                                                                                                                                                                                                                                                                                                                                                                                                                                                                                                                                                                                                                                                                                                                                                                                                                                                                                                                                                                                                                                                                 |
| Date Submitted by the Author:   | 24-Aug-2022                                                                                                                                                                                                                                                                                                                                                                                                                                                                                                                                                                                                                                                                                                                                                                                                                                                                                                                                                                                                                                                                                                                                                                                                                                                                                                                                                                                                                                                                                       |
| Complete List of Authors:       | <p>Thomas, Sonia; St Michael's Hospital Li Ka Shing Knowledge Institute, Knowledge Translation Program</p> <p>Parker, Amanda; St Michael's Hospital Li Ka Shing Knowledge Institute</p> <p>Fortune, Jennifer; RCSI University of Medicine and Health Sciences, Department of Public Health and Epidemiology</p> <p>Mitchell, Gary; Queen's University Belfast, School of Nursing and Midwifery</p> <p>Hezam, Areej; St Michael's Hospital Li Ka Shing Knowledge Institute</p> <p>Jiang, Ying; Public Health Agency of Canada, Centre for Surveillance and Applied Research</p> <p>Degroh, Margaret; Public Health Agency of Canada, Centre for Surveillance and Applied Research</p> <p>Anderson, Kerry; Public Health Agency of Canada, Centre for Health Promotion</p> <p>Gauthier-Beaupré, Amélie; Public Health Agency of Canada, Centre for Health Promotion; University of Ottawa, Faculty of Health Sciences</p> <p>Barker, Joan; St Michael's Hospital Li Ka Shing Knowledge Institute</p> <p>Watt, Jennifer; St Michael's Hospital Li Ka Shing Knowledge Institute; University of Toronto, Department of Geriatric Medicine</p> <p>Straus, Sharon; St Michael's Hospital Li Ka Shing Knowledge Institute; University of Toronto, Department of Geriatric Medicine</p> <p>Tricco, Andrea; St Michael's Hospital Li Ka Shing Knowledge Institute; University of Toronto Dalla Lana School of Public Health, Epidemiology Division and Institute for Health, Management, and Evaluation</p> |
| <b>Primary Subject Heading</b>: | Geriatric medicine                                                                                                                                                                                                                                                                                                                                                                                                                                                                                                                                                                                                                                                                                                                                                                                                                                                                                                                                                                                                                                                                                                                                                                                                                                                                                                                                                                                                                                                                                |
| Secondary Subject Heading:      | Mental health                                                                                                                                                                                                                                                                                                                                                                                                                                                                                                                                                                                                                                                                                                                                                                                                                                                                                                                                                                                                                                                                                                                                                                                                                                                                                                                                                                                                                                                                                     |
| Keywords:                       | REHABILITATION MEDICINE, GERIATRIC MEDICINE, PREVENTIVE MEDICINE                                                                                                                                                                                                                                                                                                                                                                                                                                                                                                                                                                                                                                                                                                                                                                                                                                                                                                                                                                                                                                                                                                                                                                                                                                                                                                                                                                                                                                  |
|                                 |                                                                                                                                                                                                                                                                                                                                                                                                                                                                                                                                                                                                                                                                                                                                                                                                                                                                                                                                                                                                                                                                                                                                                                                                                                                                                                                                                                                                                                                                                                   |

SCHOLARONE™  
Manuscripts



I, the Submitting Author has the right to grant and does grant on behalf of all authors of the Work (as defined in the below author licence), an exclusive licence and/or a non-exclusive licence for contributions from authors who are: i) UK Crown employees; ii) where BMJ has agreed a CC-BY licence shall apply, and/or iii) in accordance with the terms applicable for US Federal Government officers or employees acting as part of their official duties; on a worldwide, perpetual, irrevocable, royalty-free basis to BMJ Publishing Group Ltd ("BMJ") its licensees and where the relevant Journal is co-owned by BMJ to the co-owners of the Journal, to publish the Work in this journal and any other BMJ products and to exploit all rights, as set out in our [licence](#).

The Submitting Author accepts and understands that any supply made under these terms is made by BMJ to the Submitting Author unless you are acting as an employee on behalf of your employer or a postgraduate student of an affiliated institution which is paying any applicable article publishing charge ("APC") for Open Access articles. Where the Submitting Author wishes to make the Work available on an Open Access basis (and intends to pay the relevant APC), the terms of reuse of such Open Access shall be governed by a Creative Commons licence – details of these licences and which [Creative Commons](#) licence will apply to this Work are set out in our licence referred to above.

Other than as permitted in any relevant BMJ Author's Self Archiving Policies, I confirm this Work has not been accepted for publication elsewhere, is not being considered for publication elsewhere and does not duplicate material already published. I confirm all authors consent to publication of this Work and authorise the granting of this licence.

## Global evidence on falls and subsequent social isolation in older adults: A scoping review

1  
2  
3  
4  
5  
6  
7  
8 Sonia M. Thomas<sup>1</sup> email: [Sonia.Thomas@unityhealth.to](mailto:Sonia.Thomas@unityhealth.to)  
9  
10 Amanda Parker<sup>1</sup> email: [Amanda.Parker@unityhealth.to](mailto:Amanda.Parker@unityhealth.to)  
11  
12 Jennifer Fortune<sup>2</sup> email: [jenniferfortune@rcsi.ie](mailto:jenniferfortune@rcsi.ie)  
13  
14 Gary Mitchell<sup>3</sup> email: [Gary.Mitchell@qub.ac.uk](mailto:Gary.Mitchell@qub.ac.uk)  
15  
16 Areej Hezam<sup>1</sup> email: [Areej.Hezam@unityhealth.to](mailto:Areej.Hezam@unityhealth.to)  
17  
18 Ying Jiang<sup>4</sup> email: [ying.jiang@phac-aspc.gc.ca](mailto:ying.jiang@phac-aspc.gc.ca)  
19  
20 Margaret de Groh<sup>4</sup> email: [margaret.degroh@phac-aspc.gc.ca](mailto:margaret.degroh@phac-aspc.gc.ca)  
21  
22 Kerry Anderson<sup>5</sup> email: [kerry.anderson@phac-aspc.gc.ca](mailto:kerry.anderson@phac-aspc.gc.ca)  
23  
24 Amélie Gauthier-Beaupré<sup>5,6</sup> email: [amelie.gauthier-beaupre@phac-aspc.gc.ca](mailto:amelie.gauthier-beaupre@phac-aspc.gc.ca)  
25  
26 Joan Barker<sup>1</sup> email: [joanbarker@rogers.com](mailto:joanbarker@rogers.com)  
27  
28 Jennifer Watt<sup>1,7</sup> email: [Jennifer.Watt@unityhealth.to](mailto:Jennifer.Watt@unityhealth.to)  
29  
30 Sharon E. Straus<sup>1,7</sup> email: [Sharon.Straus@utoronto.ca](mailto:Sharon.Straus@utoronto.ca)  
31  
32 Andrea C. Tricco<sup>1,8\*</sup> email: [Andrea.Tricco@unityhealth.to](mailto:Andrea.Tricco@unityhealth.to)  
33  
34  
35  
36  
37

38 <sup>1</sup>Li Ka Shing Knowledge Institute, St. Michael's Hospital, 209 Victoria Street, East Building,  
39 Toronto, Ontario, M5B 1W8, Canada  
40

41  
42 <sup>2</sup>Department of Public Health and Epidemiology, RCSI University of Medicine and Health  
43 Sciences, Dublin, Ireland  
44

45  
46 <sup>3</sup>School of Nursing and Midwifery, Queen's University Belfast, Belfast, United Kingdom.  
47

48  
49 <sup>4</sup>Centre for Surveillance and Applied Research, Public Health Agency of Canada, Ottawa,  
50 Ontario, Canada  
51

52  
53 <sup>5</sup>Centre for Health Promotion, Public Health Agency of Canada, Ottawa, Ontario, Canada  
54  
55  
56  
57  
58  
59  
60

1  
2  
3 <sup>6</sup>Faculty of Health Sciences, University of Ottawa, Ottawa, Ontario, Canada  
4

5 <sup>7</sup>Department of Geriatric Medicine, University of Toronto, Toronto, Ontario, Canada  
6

7 <sup>8</sup>Epidemiology Division and Institute for Health, Management, and Evaluation, Dalla Lana  
8

9  
10 School of Public Health, University of Toronto, Toronto, Ontario, Canada  
11

12 **\*Corresponding Author:**  
13

14 Dr. Andrea C. Tricco, PhD, MSc  
15

16  
17 Scientist and Director of the Knowledge Synthesis Team,  
18

19 Knowledge Translation Program, Li Ka Shing Knowledge Institute, St. Michael's Hospital  
20

21 209 Victoria Street, East Building, Toronto, Ontario, M5B 1W8, Canada  
22

23  
24 Phone: (416) 864-6060 ext. 77521, Fax: (416) 864-6057, Email: [Andrea.Tricco@unityhealth.to](mailto:Andrea.Tricco@unityhealth.to)  
25  
26  
27  
28  
29  
30  
31  
32  
33  
34  
35  
36  
37  
38  
39  
40  
41  
42  
43  
44  
45  
46  
47  
48  
49  
50  
51  
52  
53  
54  
55  
56  
57  
58  
59  
60

## 1 ABSTRACT

2 **Background:** Falls are a leading cause of injury-related hospitalizations among adults aged 65  
3 years and older and may result in social isolation.

4 **Objective:** To summarize evidence on falls and subsequent social isolation and/or loneliness in  
5 older adults through a scoping review.

6 **Eligibility criteria:** Studies were eligible for inclusion if the population had a mean age of 60  
7 years or older, they examined falls and subsequent social isolation, loneliness, fear of falling or  
8 risk factors, and were primary studies (e.g., experimental, quasi-experimental, observational,  
9 qualitative).

10 **Sources of evidence:** MEDLINE, CINAHL, Embase, Ageline, and grey literature from  
11 inception until January 11, 2021.

12 **Charting methods:** A screening and charting form was developed and pilot-tested.  
13 Subsequently, two reviewers screened citations and full-text articles, and charted the evidence.

14 **Results:** After screening 4,993 citations and 304 full-text articles, 39 studies were included in  
15 this review. Participants had a history of falling (range: 11 to 100%). Most studies were  
16 conducted in Europe (44%) and North America (33%) and were of the cross-sectional study  
17 design (66.7%), in the community (79%). Studies utilized 15 different scales. Six studies  
18 examined risk factors for social isolation and activity restriction associated with fear of falling.  
19 Six studies reported mental health outcomes related to falls and subsequent social isolation.

20 **Conclusions:** Consistency in outcome measurement is recommended, as multiple outcomes were  
21 used across the included studies. Further research is warranted in this area, given the aging  
22 population and the importance of falls and social isolation to the health of older adults.

23 **Scoping Review Registration:** 10.17605/OSF.IO/2R8HM

1  
2  
3 24 **Word count:** 246/250 (abstract), 3034/3000 (main text)  
4

5 25 **Keywords:** scoping review, older adults, falling, social isolation, loneliness, fear of falling  
6  
7

8 26 **Strengths and Limitations of this Study:**  
9

- 10 27 • A robust methodology including a thorough and extensive literature search was used to  
11  
12 28 review the literature in the area.  
13  
14 29 • There was no date limits or language limits for studies eligible for inclusion in this  
15  
16 30 scoping review.  
17  
18 31 • Scoping reviews do not assess the quality of included studies and we cannot confirm the  
19  
20 32 directional causality between falls and social isolation.  
21  
22  
23  
24  
25  
26  
27  
28  
29  
30  
31  
32  
33  
34  
35  
36  
37  
38  
39  
40  
41  
42  
43  
44  
45  
46  
47  
48  
49  
50  
51  
52  
53  
54  
55  
56  
57  
58  
59  
60

## 33 INTRODUCTION

34 Addressing social isolation in older adults is a growing priority in Canada, as over 30% older  
35 adults are at risk of social isolation [1]. Social isolation among older adults is associated with  
36 adverse health outcomes including cognitive decline, depression, anxiety, and dementia [2].  
37 Globally, falls are the second leading cause of unintentional injury death, making falls a major  
38 public health concern [3]. In Canada, falls are the leading cause of injury-related hospitalizations  
39 among adults aged 65 years and older, and 20-30% of older adults experience at least one fall  
40 each year [4]. Falls may result in serious health-related consequences including physical (e.g.,  
41 fractures), physiological (e.g., cognitive decline), and psychological (e.g., anxiety, depressive  
42 symptoms, fear of falling, and social isolation) outcomes [5].

43         Given the detrimental outcomes associated with both falls and social isolation, there is a  
44 need to understand the relationship between falls and subsequent social isolation in older adults.  
45 The current scoping review is focused on falling and the subsequent experience of social  
46 isolation and/or loneliness and to ascertain whether the COVID-19 context affected the  
47 relationship between falls and subsequent social isolation.

## 48 METHODS

### 49 Protocol and registration

50 The protocol for this scoping review was developed in accordance with the JBI (formerly Joanna  
51 Briggs Institute) guidance for scoping reviews and registered with Open Science Framework [6].  
52 An integrated knowledge translation approach was used [7], whereby colleagues from the Public  
53 Health Agency of Canada (YJ, KA, MdG, AGB) co-developed the review. The results are  
54 reported using the Preferred Reporting Items for Systematic Reviews and Meta-analysis  
55 (PRISMA) extension to scoping reviews [8] supplemented by PRISMA 2020 [9].

## 56 Patient and Public Involvement

57 Through the Strategy for Patient-Oriented Research (SPOR) Evidence Alliance, we collaborated  
58 closely with a patient partner who provided feedback on our protocol, participated in full-text  
59 screening piloting, and provided input on the manuscript (JB).

## 60 Search strategy

61 An experienced librarian developed our comprehensive literature search strategy, which was  
62 peer-reviewed by a second information specialist using the Peer Review of Electronic Search  
63 Strategies (PRESS) checklist [10]. MEDLINE, CINAHL, Embase, and Ageline were searched  
64 from inception until January 11, 2021 (Appendix 1). References of included studies and relevant  
65 reviews were scanned. Grey literature (i.e., unpublished or difficult to locate studies) was  
66 searched using the Canadian Agency for Drugs and Technologies in Health's Grey Matters  
67 checklist [11].

## 68 Eligibility criteria

69 The population of interest were older adults with a mean age of 60 years or older. The concept  
70 was the relationship between falls and subsequent social isolation or loneliness. As mentioned in  
71 our related systematic review on interventions for social isolation after falling, social isolation  
72 and loneliness are distinct concepts [12]. Social isolation included a decrease in any of the  
73 following: number of social contacts, feeling of belonging, fulfilling relationships, engagement  
74 with others, and quality of their personal network [12]. We defined loneliness as "the unpleasant  
75 experience that occurs when a person's network of social relations is deficient in some way,  
76 either quantitatively or qualitatively" [13]. For our primary objective, the context included any  
77 community or institutional setting. For our secondary objective, we limited the context to include  
78 studies that specified their consideration of the COVID-19 pandemic. Studies including



1  
2  
3 79 participants reporting a history of falling (i.e., regardless of the proportion of the sample who  
4  
5 80 fell), the role of fear of falling in this relationship, as well as any risk (e.g. medication use,  
6  
7 81 frailty) or protective (e.g. exercise, gait or balance training) factors were considered eligible for  
8  
9 82 inclusion.

10  
11  
12 83 Eligible study designs included primary research studies of experimental (e.g.,  
13  
14 84 randomized controlled trials), quasi-experimental (e.g. non-randomized controlled trials,  
15  
16 85 controlled before and after studies, interrupted time series), observational (e.g., cohort studies,  
17  
18 86 case-control studies, cross-sectional studies), qualitative (phenomenological, ethnography,  
19  
20 87 qualitative interview, etc.) and mixed method (e.g., convergent parallel, embedded, explanatory  
21  
22 88 sequential) design. No restrictions based on study year, language of publication, or study  
23  
24 89 duration were applied.

#### 25 26 27 28 90 Study selection

29  
30  
31 91 A screening form was developed and a pilot-test using 50 citations was completed with 80%  
32  
33 92 agreement, and subsequently, all remaining titles and abstracts were screened independently by  
34  
35 93 pairs of reviewers (SMT, AP, JF, GM, AH). Discrepancies were resolved by a third reviewer.

36  
37 94 Similarly, two pilot-tests were completed for full-text article screening (achieving 27%  
38  
39 95 and 40% agreement, respectively), screening criteria were revised, and subsequently, full-text  
40  
41 96 articles were assigned to independent pairs of reviewers. Discrepancies were resolved by a third  
42  
43 97 reviewer.

#### 44 45 46 98 Data charting

47  
48  
49 99 A charting form was developed to capture data on study characteristics, population  
50  
51 100 characteristics and outcomes of interest. Relevant outcomes included any data illustrating the  
52  
53 101 relationship between falls and subsequent social isolation, including the role of fear of falling,  
54  
55  
56  
57  
58  
59  
60

102 and other risk factors or protective factors. A pilot-test was conducted using five studies,  
 103 sufficient agreement was achieved, and subsequently, full data charting was completed by  
 104 independent pairs of reviewers. Discrepancies were resolved by a third reviewer.

#### 105 Analysis and presentation of results

106 The review findings were summarized descriptively using summary tables.

## 107 **RESULTS**

108 After screening 4993 citations and 304 full-text articles against our eligibility criteria, 39 studies  
 109 were identified as eligible for inclusion based on our primary objective for this review (Figure 1).

110 No studies were identified when limiting to the COVID-19 context for our secondary objective.

111 Study and patient characteristics have been summarized in Table 1 and detailed data are reported  
 112 in Appendices 2 and 3.

113 Table 1: Summary of study and patient characteristics

| Characteristics                     | Number (%)                 |
|-------------------------------------|----------------------------|
| <b>Study Characteristics (n=39)</b> |                            |
| <b>Geographical region</b>          |                            |
| Asia                                | 5 (12.8%)                  |
| Australia                           | 1 (2.5%)                   |
| Europe                              | 17 (43.6%)                 |
| North America                       | 13 (33.3%)                 |
| South America                       | 3 (7.7%)                   |
| <b>Study design</b>                 |                            |
| Cohort                              | 6 (13.8%)                  |
| Cross-sectional                     | 26 (66.7%)                 |
| Qualitative                         | 7 (19.4%)                  |
| <b>Study duration</b>               |                            |
| Not applicable                      | 29 (74.3%)                 |
| ≤ 1 year                            | 5 (12.8%)                  |
| ≥ 1 year                            | 5 (12.8%)                  |
| <b>Patient characteristics</b>      |                            |
| <b>Mean age</b>                     | 74.9 (range, 65.0 to 95.0) |
| Not reported                        | 11 (28.2%)                 |
| 65.0-69.9 years                     | 4 (10.2%)                  |
| 70.0-74.9 years                     | 8 (20.5%)                  |
| 75.0-79.9 years                     | 14 (35.9%)                 |

|                                               |                                   |            |
|-----------------------------------------------|-----------------------------------|------------|
|                                               | ≥80.0 years                       | 2 (5.1%)   |
| <b>Proportion of female participants</b>      | Mean: 65.3% (range, 42.5 to 88.9) |            |
| <b>Sample size</b>                            | Mean: 3043.6 (9 to 43487)         |            |
|                                               | <100                              | 11 (28.2%) |
|                                               | 100-499                           | 11 (28.2%) |
|                                               | 500-999                           | 3 (7.7%)   |
|                                               | 1000-1999                         | 4 (10.2%)  |
|                                               | 2000-5000                         | 4 (10.2%)  |
|                                               | >5000                             | 6 (15.4%)  |
| <b>Study setting</b>                          |                                   |            |
|                                               | Community                         | 31 (79.4%) |
|                                               | Medical                           | 6 (15.4%)  |
|                                               | Nursing home                      | 1 (2.5%)   |
|                                               | Multi-site                        | 1 (2.5%)   |
| <b>Participants living alone</b>              | 44.1% (range, 0 to 100)           |            |
| <b>Participants with a history of falling</b> | Mean: 50.8% (range, 11.2 to 100)  |            |
|                                               | Not reported*                     | 11 (28.2%) |
|                                               | ≤25%                              | 6 (15.4%)  |
|                                               | 25-40%                            | 10 (25.6%) |
|                                               | 40-85%                            | 5 (12.8%)  |
|                                               | >85%                              | 7 (17.9%)  |

**Note:** \*not reported for the overall sample

#### 114 Study characteristics

115 The publication year for included studies ranged from 1987 to 2020, with more than half  
 116 published since 2010. Most studies were conducted in Europe (17/39, 44%) and North America  
 117 (13/39, 33%). More than half of the studies were cross-sectional study design (66.7%) and 7  
 118 qualitative studies were included. Most were conducted in the community (79%). Studies utilized  
 119 15 different scales and a variety of self reported responses to assess variables such as social  
 120 isolation, loneliness. (e.g., 18-item Lubben Social Network Scale, 6-item de Jong-Gierveld  
 121 Loneliness Scale). Six studies identified risk factors for social isolation and for activity  
 122 restriction due to fear of falling (Table 2). Six studies reported mental health outcomes  
 123 (Appendix 4).  
 124 Table 2: Potential risk factors for social isolation and activity restriction associated with fear of  
 125 falling

| Author, Year                                       | Risk factor                                | Associated evidence                                                                                                                                                          |
|----------------------------------------------------|--------------------------------------------|------------------------------------------------------------------------------------------------------------------------------------------------------------------------------|
| <b>Social Isolation after injurious fall</b>       |                                            |                                                                                                                                                                              |
| Nicholson, 2005                                    | Sex (female)                               | The authors noted a strong positive correlation between injurious falls and social isolation for women ( $\rho = -0.5$ ; $p = 0.01$ ), but this was not significant for men. |
| <b>Activity Restriction due to fear of falling</b> |                                            |                                                                                                                                                                              |
| Zijlstra, 2007                                     | Aged 80 years or older                     | OR: 1.56 (95% CI, 1.24-1.95)                                                                                                                                                 |
|                                                    | Fair perceived general health              | OR: 2.92 (95% CI, 2.43-3.52)                                                                                                                                                 |
|                                                    | Poor perceived general health              | OR: 5.7 (95% CI, 3.57-9.12)                                                                                                                                                  |
| Curcio, 2009                                       | Poor perceived health                      | OR: 1.38 (95% CI, 1.06-1.79)                                                                                                                                                 |
|                                                    | Depression                                 | OR: 1.76 (95% CI, 1.38-2.24)                                                                                                                                                 |
|                                                    | Low social participation                   | OR: 1.52 (95% CI, 1.20-1.92)                                                                                                                                                 |
|                                                    | Difficulties in activities of daily living | OR: 1.65 (95% CI, 1.16-2.32)                                                                                                                                                 |
|                                                    | Decreased physical activity                | OR: 1.35 (95% CI, 1.06-1.70)                                                                                                                                                 |
|                                                    | Polypharmacy                               | OR: 1.56 (95% CI, 1.14-2.14)                                                                                                                                                 |
|                                                    | Below poverty level                        | OR: 1.32 (95% CI, 1.05-1.65)                                                                                                                                                 |
| Dias, 2011                                         | Depression                                 | Chi-square=15.2, $p = 0.004$                                                                                                                                                 |
|                                                    | Exhaustion (frailty)                       | Chi-square=9.2, $p = 0.01$                                                                                                                                                   |
|                                                    | Participation in social activities         | Chi-square=10.4, $p = 0.016$                                                                                                                                                 |
| Murphy, 2002                                       | Two or more chronic conditions             | ARR: 1.34 (95% CI, 1.08-1.65)                                                                                                                                                |
|                                                    | Slow-timed physical performance            | ARR: 1.44 (95% CI, 1.18-1.75)                                                                                                                                                |
| Merchant, 2020                                     | Sarcopenia                                 | OR, 8.13 (95% CI, 1.52–43.41)                                                                                                                                                |

126 Abbreviations: OR, odds ratio; ARR, adjusted risk ratio

### 127 Patient characteristics

128 Across all studies, the number of included patients was 118,702, with an average of 3,043  
 129 patients per study. Their mean age ranged from 65 to 95 years. Approximately 65% of patients  
 130 were female. Most studies included participants with a history of falling, ranging from 11% to  
 131 100% of the study population.

### 132 Cohort studies

1  
2  
3 133 Among the 39 included studies, six were cohort studies (Appendix 5). Tinetti et al (1998)  
4  
5 134 demonstrated a significant relationship between multiple non-injurious falls and a decline in  
6  
7 135 social functioning (Regression coefficient = -0.538 ( $p < 0.05$ )), measured using the Social Activity  
8  
9 136 scale, in a sample of 770 older adults after 3 years of follow-up [14]. Similarly, Pin et al. (2016)  
10  
11 137 found that in their cohort of 16,583 participants, those who fell showed decreased social  
12  
13 138 participation after falling ( $p < 0.001$ ), which was no longer statistically significant when frailty  
14  
15 139 was added in the model [15].

16  
17  
18  
19 140 Vellas et al. (1987) compared people who fall versus those who did not in two  
20  
21 141 populations: a retirement home ( $n=118$ ) and older adults living at home ( $n=60$ ) [16]. Among the  
22  
23 142 older adults who lived at home, they noted that fewer fallers were able to maintain the same level  
24  
25 143 of activity after 6 months of follow-up when compared to non-fallers ( $p < 0.02$ ).

26  
27  
28 144 Van der Meulen et al. (2014) assessed social participation (using the Frenchay Activities  
29  
30 145 Index) in 260 older adults with low and high levels of concern about falling over 14-months [17].  
31  
32 146 They reported significant differences (specific results not reported) between the groups, with  
33  
34 147 lower social participation scores in those who had a higher level of concern about falling.

35  
36  
37 148 In 4,680 older adults, Yu et al. (2021) reported a significant relationship between the  
38  
39 149 number of falls and loneliness scores (measured using the 3 item University of California, Los  
40  
41 150 Angeles (UCLA) Loneliness Scale) across three time points over 4-years ( $B = 0.008$ ,  $p < 0.05$ )  
42  
43 151 [18]. A cohort study by Hajek et al. (2020) looked at loneliness (as measured using the Bude and  
44  
45 152 Lantermann scale) and social isolation (measured using the De Jong Gierveld Loneliness Scale)  
46  
47 153 and their link to fear of falling 669 older adults [19]. They compared older adults with an onset  
48  
49 154 of fear of falling, to those who had no fear. Their findings revealed that the end of fear of falling  
50  
51  
52  
53  
54  
55  
56  
57  
58  
59  
60

1  
2  
3 155 was associated with lower loneliness scores ( $\beta = -0.06$ ,  $p < 0.05$ ) and other negative psychosocial  
4  
5 156 outcomes (e.g., increased depressive symptoms).

7  
8 157 Cross-sectional studies related to falls and social isolation

9  
10 158 Of the twenty-six cross-sectional studies included in this review, 11 reported on the relationship  
11  
12 159 between falls and social isolation or loneliness (Appendix 6).

13  
14 160 Quach et al. (2016) examined the relationship between falls and scores on the Social  
15  
16 161 Relationship Index including 8,464 participants [20]. They noted that participants who reported  
17  
18 162 experiencing a fall or multiple falls had a lower social relationship index score (mean, 3.24 and  
19  
20 163 3.08 respectively) compared to those who had not fallen (mean, 3.34;  $p < 0.0001$ ).

21  
22 164 Hajek et al (2017) examined variables associated with a history of falling in 7,808  
23  
24 165 participants [21]. They found those reporting a fall in the previous 12 months had higher  
25  
26 166 loneliness scores (De Jong Gierveld Loneliness Scale;  $\beta = .08$ ,  $p < .001$ ) and social exclusion  
27  
28 167 scores (Bude and Lantermann scale;  $\beta = .08$ ,  $p < .001$ ) compared to those who had not fallen.

29  
30 168 Schnittger et al. (2012) conducted a study in 579 older adults identifying risk factors for  
31  
32 169 different pathways of loneliness – emotional loneliness, social loneliness (both measured using  
33  
34 170 the De Jong Gierveld Loneliness Scale), and social support (measured using the Lubben Social  
35  
36 171 Network Scale) [22]. A history of falls was the only biological variable that was identified as a  
37  
38 172 statistically significant risk factor for inclusion in the model for social support (correlation  
39  
40 173 coefficient= -0.247;  $p < 0.003$ ).

41  
42 174 Stel et al (2004) reported a statistically significant decline in social activities in 204 older  
43  
44 175 adults who experienced a fall inside their home (OR: 2.6 (95% CI: 1.1-6.5);  $p < 0.05$ ) [23], and  
45  
46 176 Vanden Wyngaert et al. (2020) reported an association between risk of falls and participation in  
47  
48 177 social roles and activities in 154 older adult haemodialysis patients (PROMIS questionnaire;

1  
2  
3 178  $R^2=0.11$ ;  $p=0.01$ ) [24]. Finally, Nicholson et al. (2005) reported a strong positive relationship  
4  
5 179 between experiencing an injurious fall and increasing social isolation in a sample of 68 older  
6  
7 180 adults (Lubben Social Network Scale;  $\rho= -0.4$ ;  $p<0.05$ ), and highlighted that this relationship  
8  
9 181 was stronger in women ( $\rho= -0.5$ ;  $p=0.01$ ) [25]. Additionally, they assessed this relationship using  
10  
11 182 both the Family and Friends subscales of the Lubben Social Network Scale and found that the  
12  
13 183 correlation was specific to the Friends subscale ( $\rho= -0.43$ ;  $p<0.05$ ).

14  
15  
16  
17 184 Iliffe et al. (2007) and Robins et al. (2018) found no statistically significant associations  
18  
19 185 between falls and social isolation using the Lubben Social Network Scale in a sample of 3,139  
20  
21 186 older adults and the Friendship Scale for social isolation in a sample of 245 older adults,  
22  
23 187 respectively [26, 27]. Similarly, Van Lankveld et al. (2011) and Faria et al. (2020) found no  
24  
25 188 correlation between falls and loneliness, using the De Jong Gierveld Loneliness scale in a sample  
26  
27 189 of 579 older adults, and the UCLA scale in a sample of 48 older adults, respectively [28, 29].  
28  
29  
30 190 Additionally, Finn et al. (2001) noted no difference in scores for the OARS social support scale  
31  
32 191 when comparing fallers to non-fallers in a nursing home setting ( $n=49$ ) [30].

### 33 192 Cross-sectional studies related to fear of falling and social isolation

34  
35  
36  
37 193 Seven studies examined fear of falling linked to falls and social isolation (Appendix 7). Gagnon  
38  
39 194 et al. (2005) reported a statistically significant positive relationship between fear of falling and  
40  
41 195 social support in a sample of 105 older adults (measured using the confiding-relationships  
42  
43 196 component of the Bedford Life Events and Difficulties Schedule modified for elderly subjects;  
44  
45 197 Wald chi-square= 3.77;  $p=0.05$ ) [31]. Curcio et al. (2009) reported a strong relationship between  
46  
47 198 fear of falling and low social participation in 1,668 older adults (OR, 1.52; 95% CI, 1.20-1.92;  
48  
49 199  $p<0.01$ ) [32]. Petrinc et al. (2020) identified fear of falling as an independent predictor of social  
50  
51  
52  
53  
54  
55  
56  
57  
58  
59  
60



1  
2  
3 200 functioning (as measured by the Medical Outcomes Study 36-item Short-Form General Health  
4  
5 201 Survey;  $\beta = -0.29$ ) in 108 older adults [33].

6  
7 202 Merchant et al. (2020) and Iliffe et al. (2007) showed no statistically significant  
8  
9 203 relationship between fear of falling and social isolation in 493 older adults and 3,139 older  
10  
11 204 adults, respectively [26, 34]. Ferreira et al. (2018) and Kara et al. (2009) showed no association  
12  
13 205 between fear of falling and social participation (n= 7,935) or fear of falling and loneliness  
14  
15 206 (n=47), respectively [35, 36].

16  
17 207 Cross-sectional studies related to falls and activity restriction due to fear of falling

18  
19 208 Eight studies examined the relationship between falls and activity restriction due to fear of  
20  
21 209 falling (Appendix 7). Tinetti et al (1994) and Apikomkon et al. (2003) both reported a  
22  
23 210 statistically significant decrease in activity due to fear of falling in individuals who experienced a  
24  
25 211 fall compared to those who had not (n=1,103, chi-square= 13.1,  $p < 0.001$ ; and n=546, chi-  
26  
27 212 square=5.49,  $p < 0.05$ , respectively) [37, 38]. Similarly, in 1,668 older adults, Curcio et al. (2009)  
28  
29 213 demonstrated that those who restricted activity due to fear of falling were more likely to have  
30  
31 214 experienced a fall in the year prior (OR: 1.48 (95%CI, 1.18-1.86);  $p = 0.001$ ) [32], and Mendes da  
32  
33 215 Costa et al. (2012) demonstrated that activity restriction increased in those with multiple falls  
34  
35 216 over the past year (OR, 3.04; 95% CI, 1.70-5.42) [39]. Murphy et al. (2002), and Choi et al.  
36  
37 217 (2015) showed that a history of injurious falls was independently associated with activity  
38  
39 218 restriction due to fear of falling (n=1,064, ARR: 1.36; 95% CI, 1.11-1.66;  $p = 0.003$ ; and n=4,247,  
40  
41 219 OR, 3.03; 95% CI, 1.21-7.54,  $p = 0.008$ , respectively) [40, 41].

42  
43 220 Howland et al. (1998) reported no relationship between the experience of a fall and  
44  
45 221 activity restriction in a sample of 266 older adults (OR: 1.094; 95% CI, 0.376-3.177;  $p = 0.869$ )  
46  
47 222 [42], as did Choi et al. (2015) (OR, 2.12; 95% CI, 0.96-4.67;  $p = 0.062$ ) among 4,247 older adults  
48  
49  
50  
51  
52  
53  
54  
55  
56  
57  
58  
59  
60



1  
2  
3 223 [41]. Similarly, Merchant et al. (2020) also reported no significant relationship between the  
4  
5 224 number of falls and fear-based activity restriction in 493 older adults (OR, 1.4; 95% CI, 0.94–  
6  
7  
8 225 2.20) [34].  
9

### 10 226 Qualitative studies

11  
12 227 Seven qualitative studies were included (Appendix 8). All participants interviewed were older  
13  
14 228 adults (n=124), including 51 stroke survivors [43, 44] and 10 experiencing frailty [45]. Common  
15  
16  
17 229 categories identified across these studies were activity restriction to manage fear of falling,  
18  
19 230 changing behaviours to avoid falling [43, 45-47], feeling restricted due to reduced mobility after  
20  
21 231 falling [43, 44, 48], increasing dependence on caregivers [43, 45], developing fear of falling [43,  
22  
23  
24 232 45], feelings of loneliness or isolation [43, 48], and a negative impact on identity or autonomy  
25  
26 233 [47].  
27

## 28 234 **DISCUSSION**

29  
30  
31 235 We conducted a comprehensive scoping review including 39 studies examining the relationship  
32  
33 236 between falls and subsequent social isolation. We limited the scoping review to studies that  
34  
35 237 identified social isolation after a fall, this was due to the request of the commissioning  
36  
37  
38 238 knowledge user. More than half of the studies were published since 2010, suggesting increased  
39  
40 239 interest in the relationship between falls and social isolation in older adults. Social isolation and  
41  
42 240 loneliness were measured using a variety of outcome measures across studies, such as degree of  
43  
44  
45 241 activity, and varying scales for loneliness, social isolation, social participation, social support,  
46  
47 242 etc. This highlights the growing need for consistency in the measurement of social isolation and  
48  
49 243 loneliness to allow for meaningful comparison across studies. Cornwall et al. (2009) highlight  
50  
51 244 previous efforts to consolidate different measures of social isolation and build off this work.  
52  
53  
54  
55  
56  
57  
58  
59  
60

1  
2  
3 245 They combined multiple measures of social isolation to develop two scales that measure distinct  
4  
5 246 dimensions of social isolation – social disconnectedness and perceived isolation [49].  
6

7  
8 247 Only a few studies examined risk factors and mental health outcomes related to falls and  
9  
10 248 subsequent social isolation. Risk factors linked to social isolation and activity restriction  
11  
12 249 included age, sex/gender, poor perceived health, poverty, frailty, and comorbidity. Few studies  
13  
14 250 also documented an association between activity restriction due to fear of falling and depression.  
15  
16  
17 251 Our findings suggest the presence of gaps in the literature for these important outcomes,  
18  
19 252 highlighting the need for further research. No randomized trials exploring interventions for social  
20  
21 253 isolation after a fall were identified in our scoping review, highlighting another gap in the  
22  
23 254 literature and an area for future research to explore.  
24  
25

26 255 We did not identify any studies on falls and subsequent social isolation that were specific  
27  
28 256 to the COVID-19 context, highlighting another gap in the evidence base. A scoping review by  
29  
30 257 Kasar et al. (2021) suggests that older adults face increased social isolation as a result of  
31  
32 258 pandemic-related restrictions, which can result in increased loneliness and reduced quality of life  
33  
34 259 [50]. They also highlighted how technology can be used to deliver virtual or tele-health support  
35  
36 260 services, and to allow older adults stay connected with their social networks [50]. A systematic  
37  
38 261 review by Larson et al. (2021) assessed the impact of COVID-19 lockdowns on physical activity  
39  
40 262 in older adults and reported that most studies demonstrated a decline in physical activity or an  
41  
42 263 increase in sedentary behaviours in this population. The effectiveness of physical activity and  
43  
44 264 exercise in preventing falls and fractures in older adults is well-established in the literature [51-  
45  
46 265 53]. A decline in physical activity in older adults could lead to sarcopenia, and an increased risk  
47  
48 266 of falls or fractures [53].  
49  
50  
51  
52  
53  
54  
55  
56  
57  
58  
59  
60

1  
2  
3 267           There are several strengths to our scoping review, such as the use of the JBI guide, and  
4  
5 268   the PRISMA-ScR. A comprehensive literature search was conducted and several different types  
6  
7  
8 269   of study designs were included. However, limitations include that all studies were conducted in  
9  
10 270   middle-high- or high-income economy countries. This suggests that our results may not be  
11  
12 271   generalizable to low- and middle-income countries, highlighting a gap in the literature. Many of  
13  
14 272   the included studies were cross-sectional and we cannot confirm the directional causality  
15  
16  
17 273   between falls and social isolation without more robust research. Furthermore, none of the  
18  
19 274   included studies specifically focused on culturally and linguistically diverse (CALD)  
20  
21 275   backgrounds, who might be at greater risk of social isolation after experiencing a fall. Additional  
22  
23 276   research is warranted in this area [54]. In addition, we were unable to update the literature search  
24  
25  
26 277   due to lack of capacity and funding.

27  
28 278           In summary, we found a dearth of research, particularly examining risk factors and  
29  
30 279   mental health outcomes related to social isolation and falling older adults. Further research is  
31  
32  
33 280   warranted in this area, given the importance of falls and social isolation to the health of older  
34  
35 281   adults.

1  
2  
3 282 **LIST OF ABBREVIATIONS**  
4

5 283 ARR Absolute Risk Reduction  
6

7  
8 284 CADTH Canadian Agency for Drugs and Technologies in Health  
9

10 285 CI Confidence interval  
11

12 286 OR Odds Ratio  
13

14  
15 287 PRESS Peer Review of Electronic Search Strategies  
16

17 288 PRISMA Preferred Reporting Items for Systematic Reviews and Meta-Analyses  
18  
19  
20

21 289 **DECLARATIONS**  
22

23  
24 290 Funding  
25

26 291 This project was commissioned and funded by the Public Health Agency of Canada  
27

28 292 [4500415303] through the query services of the SPOR Evidence Alliance. The SPOR Evidence  
29

30  
31 293 Alliance is supported by the Canadian Institutes of Health Research (CIHR) under Canada's  
32

33 294 Strategy for Patient-Oriented Research (SPOR) initiative, and the generosity of partners from 41  
34

35 295 public agencies and organizations across Canada who have made cash or in-kind contributions.  
36

37 296 Dr. Tricco is funded by a Tier 2 Canada Research Chair in Knowledge Synthesis [17-0126-  
38

39 297 AWA], and Dr. Straus is funded by a Tier 1 Canada Research Chair in Knowledge Translation  
40

41  
42 298 [17-0245-SUB].  
43

44 299 Ethics approval  
45

46  
47 300 Not required.  
48

49 301 Consent for publication  
50

51 302 Not applicable.  
52

53  
54 303 Availability of data and materials  
55  
56  
57  
58  
59  
60

1  
2  
3 304 The full dataset is available from the corresponding author upon reasonable request.  
4

5 305 Conflict of interests  
6

7  
8 306 All authors do not have any potential (or perceived) conflicts of interest.  
9

10 307 Author Contribution  
11

12 308 ACT obtained funding for this study. SMT, ACT, YJ, MdG, and KA conceptualized the study.  
13

14 309 SMT drafted the protocol, with input from ACT, YJ, MdG, KA, JB, JW, and SES. SMT oversaw  
15

16 310 screening, full-text review, and data abstraction. SMT, AP, JF, GM, AH, and JB screened  
17

18 311 citations and full text articles, abstracted and verified data. SMT and ACT interpreted results,  
19

20 312 and SMT, AP, and ACT drafted the manuscript and revised the final version of the manuscript.  
21

22 313 JF, GM, AH, YJ, MdG, KA, AGB, JB, JW, and SES critically reviewed the manuscript. All  
23

24 314 authors approved of the final version.  
25  
26  
27

28 315 Role of the funder  
29

30 316 The funders were co-developers of this research project and contributed to the design of the  
31

32 317 study and reviewed/approved of the manuscript.  
33  
34

35 318 Acknowledgements  
36

37 319 We thank Alissa Epworth for running the searches, de-duplicating results and obtaining full-text  
38

39 320 articles. We also thank Katrina Chiu and Faryal Khan for their support with formatting the  
40

41 321 manuscript and creating tables and appendices.  
42  
43  
44  
45  
46

47 322 **SUPPLEMENTAL FILES**  
48

49 323 Supplemental File 1: PRISMA Checklist  
50

51 324 Supplemental File 2: Appendices  
52  
53  
54  
55  
56  
57  
58  
59  
60

## REFERENCES

1. Keefe J, Andrew M, Fancey P, Hall M. A profile of social isolation in Canada. Report submitted to the F/P/T Working Group on Social Isolation Province of British Columbia and Mount Saint Vincent University. 2006.
2. Government of Canada. Report on the Social Isolation of Seniors. 2016, July 20.
3. World Health Organization. Falls. 2021, April 26; Available from: <https://www.who.int/news-room/fact-sheets/detail/falls>.
4. Public Health Agency of Canada. Seniors' Falls in Canada: Second Report. 2014.
5. Terroso M, Rosa N, Marques AT, Simoes R. Physical consequences of falls in the elderly: a literature review from 1995 to 2010. *Eur Rev Aging Phys Act*. 2014;11(1):51-9.
6. Tricco A, Thomas SM, Ramkissoon N, Mitchell G, Fortune J, Watt J, et al. Falls and social isolation in older adults. 2021; Available from: <https://osf.io/2r8hm>.
7. Kothari A, McCutcheon C, Graham ID. Defining integrated knowledge translation and moving forward: a response to recent commentaries. *Int J Health Policy Manag*. 2017;6(5):299.
8. Tricco AC, Lillie E, Zarin W, O'Brien KK, Colquhoun H, Levac D, et al. PRISMA extension for scoping reviews (PRISMA-ScR): checklist and explanation. *Ann Intern Med*. 2018;169(7):467-73.
9. Page MJ, McKenzie JE, Bossuyt PM, Boutron I, Hoffmann TC, Mulrow CD, et al. The PRISMA 2020 statement: an updated guideline for reporting systematic reviews. *BMJ*. 2021;372.
10. McGowan J, Sampson M, Salzwedel DM, Cogo E, Foerster V, Lefebvre C. PRESS peer review of electronic search strategies: 2015 guideline statement. *J Clin Epidemiol*. 2016;75:40-6.
11. Canadian Agency for Drugs Technologies in Health. Grey Matters: a practical tool for searching health-related grey literature (Internet). 2018.
12. Tricco A, Thomas SM, Radhakrishnan A, Ramkissoon N, Mitchell G, Fortune J, et al. Interventions for social isolation in older adults who have experienced a fall: A systematic review. *BMJ Open*. 2022; 12(4):e056540.
13. Perlman D, Peplau LA. Toward a social psychology of loneliness. *Pers Relationsh*. 1981;3:31-56.
14. Tinetti ME, Williams CS. The effect of falls and fall injuries on functioning in community-dwelling older persons. *J Gerontol A Biol Sci Med Sci*. 1998;53(2):M112-9.
15. Pin S, Spini D. Impact of falling on social participation and social support trajectories in a middle-aged and elderly European sample. *SSM Popul Health*. 2016;2:382-9.
16. Vellas B, Cayla F, Bocquet H, de Pemille F, Albarede JL. Prospective study of restriction of activity in old people after falls. *Age Ageing*. 1987;16(3):189-93.
17. van der Meulen E, Zijlstra GA, Ambergen T, Kempen GI. Effect of fall-related concerns on physical, mental, and social function in community-dwelling older adults: a prospective cohort study. *J Am Geriatr Soc*. 2014;62(12):2333-8.
18. Yu K, Wu S, Jang Y, Chou CP, Wilber KH, Aranda MP, et al. Longitudinal Assessment of the Relationships Between Geriatric Conditions and Loneliness. *J Am Med Dir Assoc*. 2021;22(5):1107-13.e1.

- 1  
2  
3 368 19. Hajek A, König HH. What are the psychosocial consequences when fear of falling starts  
4 369 or ends? Evidence from an asymmetric fixed effects analysis based on longitudinal data  
5 370 from the general population. *Int J Geriatr Psychiatry*. 2020;35(9):1028-35.
- 6 371 20. Quach LT. Social Determinants of Falls: The Role of Social Support and Depression  
7 372 Among Community-Dwelling Older Adults. *Dissertation Abstracts International: Section*  
8 373 *B: The Sciences and Engineering* 2018; 78(8-B(E)):No Pagination Specified. 2016.
- 9 374 21. Hajek A, König HH. The association of falls with loneliness and social exclusion:  
10 375 evidence from the DEAS German Ageing Survey. *BMC Geriatr*. 2017;17(1):204.
- 11 376 22. Schnittger RI, Wherton J, Prendergast D, Lawlor BA. Risk factors and mediating  
12 377 pathways of loneliness and social support in community-dwelling older adults. *Aging*  
13 378 *Ment Health*. 2012;16(3):335-46.
- 14 379 23. Stel VS, Smit JH, Pluijm SM, Lips P. Consequences of falling in older men and women  
15 380 and risk factors for health service use and functional decline. *Age Ageing*. 2004;33(1):58-  
16 381 65.
- 17 382 24. Vanden Wyngaert K, Van Craenenbroeck AH, Eloot S, Calders P, Celie B, Holvoet E, et  
18 383 al. Associations between the measures of physical function, risk of falls and the quality of  
19 384 life in haemodialysis patients: a cross-sectional study. *BMC Nephrol*. 2020;21(1):7.
- 20 385 25. Nicholson Jr NR. The relationship between injurious falls, fear of falling, social isolation  
21 386 and depression. 2005.
- 22 387 26. Iliffe S, Kharicha K, Harari D, Swift C, Gillmann G, Stuck AE. Health risk appraisal in  
23 388 older people 2: the implications for clinicians and commissioners of social isolation risk  
24 389 in older people. *Br J Gen Pract*. 2007;57(537):277.
- 25 390 27. Robins LM, Hill KD, Finch CF, Clemson L, Haines T. The association between physical  
26 391 activity and social isolation in community-dwelling older adults. *Aging Ment Health*.  
27 392 2018;22(2):175-82.
- 28 393 28. van Lankveld W, Fransen M, van den Hoogen F, den Broeder A. Age-related health  
29 394 hazards in old patients with first-time referral to a rheumatologist: a descriptive study.  
30 395 *Arthritis*. 2011;2011:823527.
- 31 396 29. Faria A, Martins M, Ribeiro O, Gomes BP, Fernandes C. Elderly residents in the  
32 397 community: gaining knowledge to support a rehabilitation nursing program. *Rev Bras*  
33 398 *Enferm*. 2020;73Suppl 3(Suppl 3):e20200194.
- 34 399 30. Finn JM. The relationship between falls and fall-related efficacy, depression, and social  
35 400 resources: *Adler School of Professional Psychology*; 2001.
- 36 401 31. Gagnon N, Flint AJ, Naglie G, Devins GM. Affective correlates of fear of falling in  
37 402 elderly persons. *Am J Geriatr Psychiatry*. 2005;13(1):7-14.
- 38 403 32. Curcio CL, Gomez F, Reyes-Ortiz CA. Activity restriction related to fear of falling  
39 404 among older people in the Colombian Andes mountains: are functional or psychosocial  
40 405 risk factors more important? *J Aging Health*. 2009;21(3):460-79.
- 41 406 33. Petrinc AB, Crowe ML, Flanagan SK, Baker J. Health-related Quality of Life of Older  
42 407 Women Religious: Negative Influence of Frailty. *West J Nurs Res*. 2020;42(12):1088-96.
- 43 408 34. Merchant RA, Chen MZ, Wong BLL, Ng SE, Shirooka H, Lim JY, et al. Relationship  
44 409 Between Fear of Falling, Fear-Related Activity Restriction, Frailty, and Sarcopenia. *J Am*  
45 410 *Geriatr Soc*. 2020;68(11):2602-8.
- 46 411 35. Ferreira FR, César CC, Andrade FB, Souza Junior PRB, Lima-Costa MF, Proietti FA.  
47 412 Aspects of social participation and neighborhood perception: ELSI-Brazil. *Rev Saude*  
48 413 *Publica*. 2018;52Suppl 2(Suppl 2):18s.



- 1  
2  
3 414 36. Kara B, Yildirim Y, Genc A, Ekizler S. Assessment of home environment and life  
4 415 satisfaction in geriatrics and relation to fear of falling. *Turk J Physiother Rehabil.*  
5 416 2009;20(3):190-200.  
6  
7 417 37. Tinetti ME, Mendes de Leon CF, Doucette JT, Baker DI. Fear of falling and fall-related  
8 418 efficacy in relationship to functioning among community-living elders. *J Gerontol.*  
9 419 1994;49(3):M140-7.  
10 420 38. Apikommonkon H. Fear of falling and fall circumstances in Thailand: Curtin University;  
11 421 2003.  
12 422 39. Mendes da Costa E, Peppersack T, Godin I, Bantuelle M, Petit B, Levêque A. Fear of  
13 423 falling and associated activity restriction in older people. results of a cross-sectional study  
14 424 conducted in a Belgian town. *Arch Public Health.* 2012;70(1):1.  
15  
16 425 40. Murphy SL, Williams CS, Gill TM. Characteristics associated with fear of falling and  
17 426 activity restriction in community-living older persons. *J Am Geriatr Soc.* 2002;50(3):516-  
18 427 20.  
19 428 41. Choi K, Ko Y. Characteristics Associated With Fear of Falling and Activity Restriction in  
20 429 South Korean Older Adults. *J Aging Health.* 2015;27(6):1066-83.  
21  
22 430 42. Howland J, Lachman ME, Peterson EW, Cote J, Kasten L, Jette A. Covariates of fear of  
23 431 falling and associated activity curtailment. *Gerontologist.* 1998;38(5):549-55.  
24 432 43. Schmid AA, Rittman M. Consequences of poststroke falls: activity limitation, increased  
25 433 dependence, and the development of fear of falling. *Am J Occup Ther.* 2009;63(3):310-6.  
26 434 44. Xu T, O'Loughlin K, Clemson L, Lannin NA, Dean C, Koh G. Developing a falls  
27 435 prevention program for community-dwelling stroke survivors in Singapore: client and  
28 436 caregiver perspectives. *Disabil Rehabil.* 2019;41(9):1044-54.  
29  
30 437 45. Faes MC, Reelick MF, Joosten-Weyn Banningh LW, Gier Md, Esselink RA, Olde  
31 438 Rikkert MG. Qualitative study on the impact of falling in frail older persons and family  
32 439 caregivers: foundations for an intervention to prevent falls. *Aging Ment Health.*  
33 440 2010;14(7):834-42.  
34 441 46. Meltem M, Oflaz, Ç Fahriye. A Qualitative Study on the Perception of Elderly about fear  
35 442 of falling and it's impact on daily life. *Turk Geriatri Derg.* 2007;10(1):19-23.  
36  
37 443 47. Høst D, Hendriksen C, Borup I. Older people's perception of and coping with falling, and  
38 444 their motivation for fall-prevention programmes. *Scand J Public Health.* 2011;39(7):742-  
39 445 8.  
40 446 48. Chiu MW-Y. Psychosocial responses to falling in older Chinese immigrants living in the  
41 447 community [Doctoral Dissertation]. 2010.  
42 448 49. Cornwell EY, Waite LJ. Measuring social isolation among older adults using multiple  
43 449 indicators from the NSHAP study. *J Gerontol B: Psychol Sci Soc Sci.*  
44 450 2009;64(suppl\_1):i38-i46.  
45  
46 451 50. Kasar KS, Karaman E. Life in lockdown: Social isolation, loneliness and quality of life in  
47 452 the elderly during the COVID-19 pandemic: A scoping review. *Geriatr Nurs.*  
48 453 2021;42(5):1222-9.  
49 454 51. Tricco AC, Thomas SM, Veroniki AA, Hamid JS, Cogo E, Strifler L, et al. Comparisons  
50 455 of interventions for preventing falls in older adults: a systematic review and meta-  
51 456 analysis. *JAMA.* 2017;318(17):1687-99.  
52  
53 457 52. Langhammer B, Bergland A, Rydwik E. The importance of physical activity exercise  
54 458 among older people. *BioMed Res;* 2018.  
55  
56  
57  
58  
59  
60



- 1  
2  
3 459 53. Larson EA, Bader-Larsen KS, Magkos F. The effect of COVID-19-related lockdowns on  
4 460 diet and physical activity in older adults: A systematic review. *Aging Dis.*  
5 461 2021;12(8):1935.  
6 462 54. Jang H, Lovarini M, Clemson L, Willis K, Lord S, Sherrington C. Fall prevention  
7 463 programs for culturally and linguistically diverse groups: program provider perspectives.  
8 464 *Ethn Health.* 2021 Feb;26(2):299-317. doi: 10.1080/13557858.2018.1493436.

10  
11  
12  
13  
14  
15  
16  
17  
18  
19  
20  
21  
22  
23  
24  
25  
26  
27  
28  
29  
30  
31  
32  
33  
34  
35  
36  
37  
38  
39  
40  
41  
42  
43  
44  
45  
46  
47  
48  
49  
50  
51  
52  
53  
54  
55  
56  
57  
58  
59  
60

For peer review only

1  
2  
3  
4  
5  
6  
7  
8  
9  
10  
11  
12  
13  
14  
15  
16  
17  
18  
19  
20  
21  
22  
23  
24  
25  
26  
27  
28  
29  
30  
31  
32  
33  
34  
35  
36  
37  
38  
39  
40  
41  
42  
43  
44  
45  
46  
47  
48  
49  
50  
51  
52  
53  
54  
55  
56  
57  
58  
59  
60

465 **FIGURE LEGEND:**

466 Figure 1 – PRISMA 2020 study flow diagram.

467

For peer review only

Figure 1: PRISMA 2020 study flow diagram

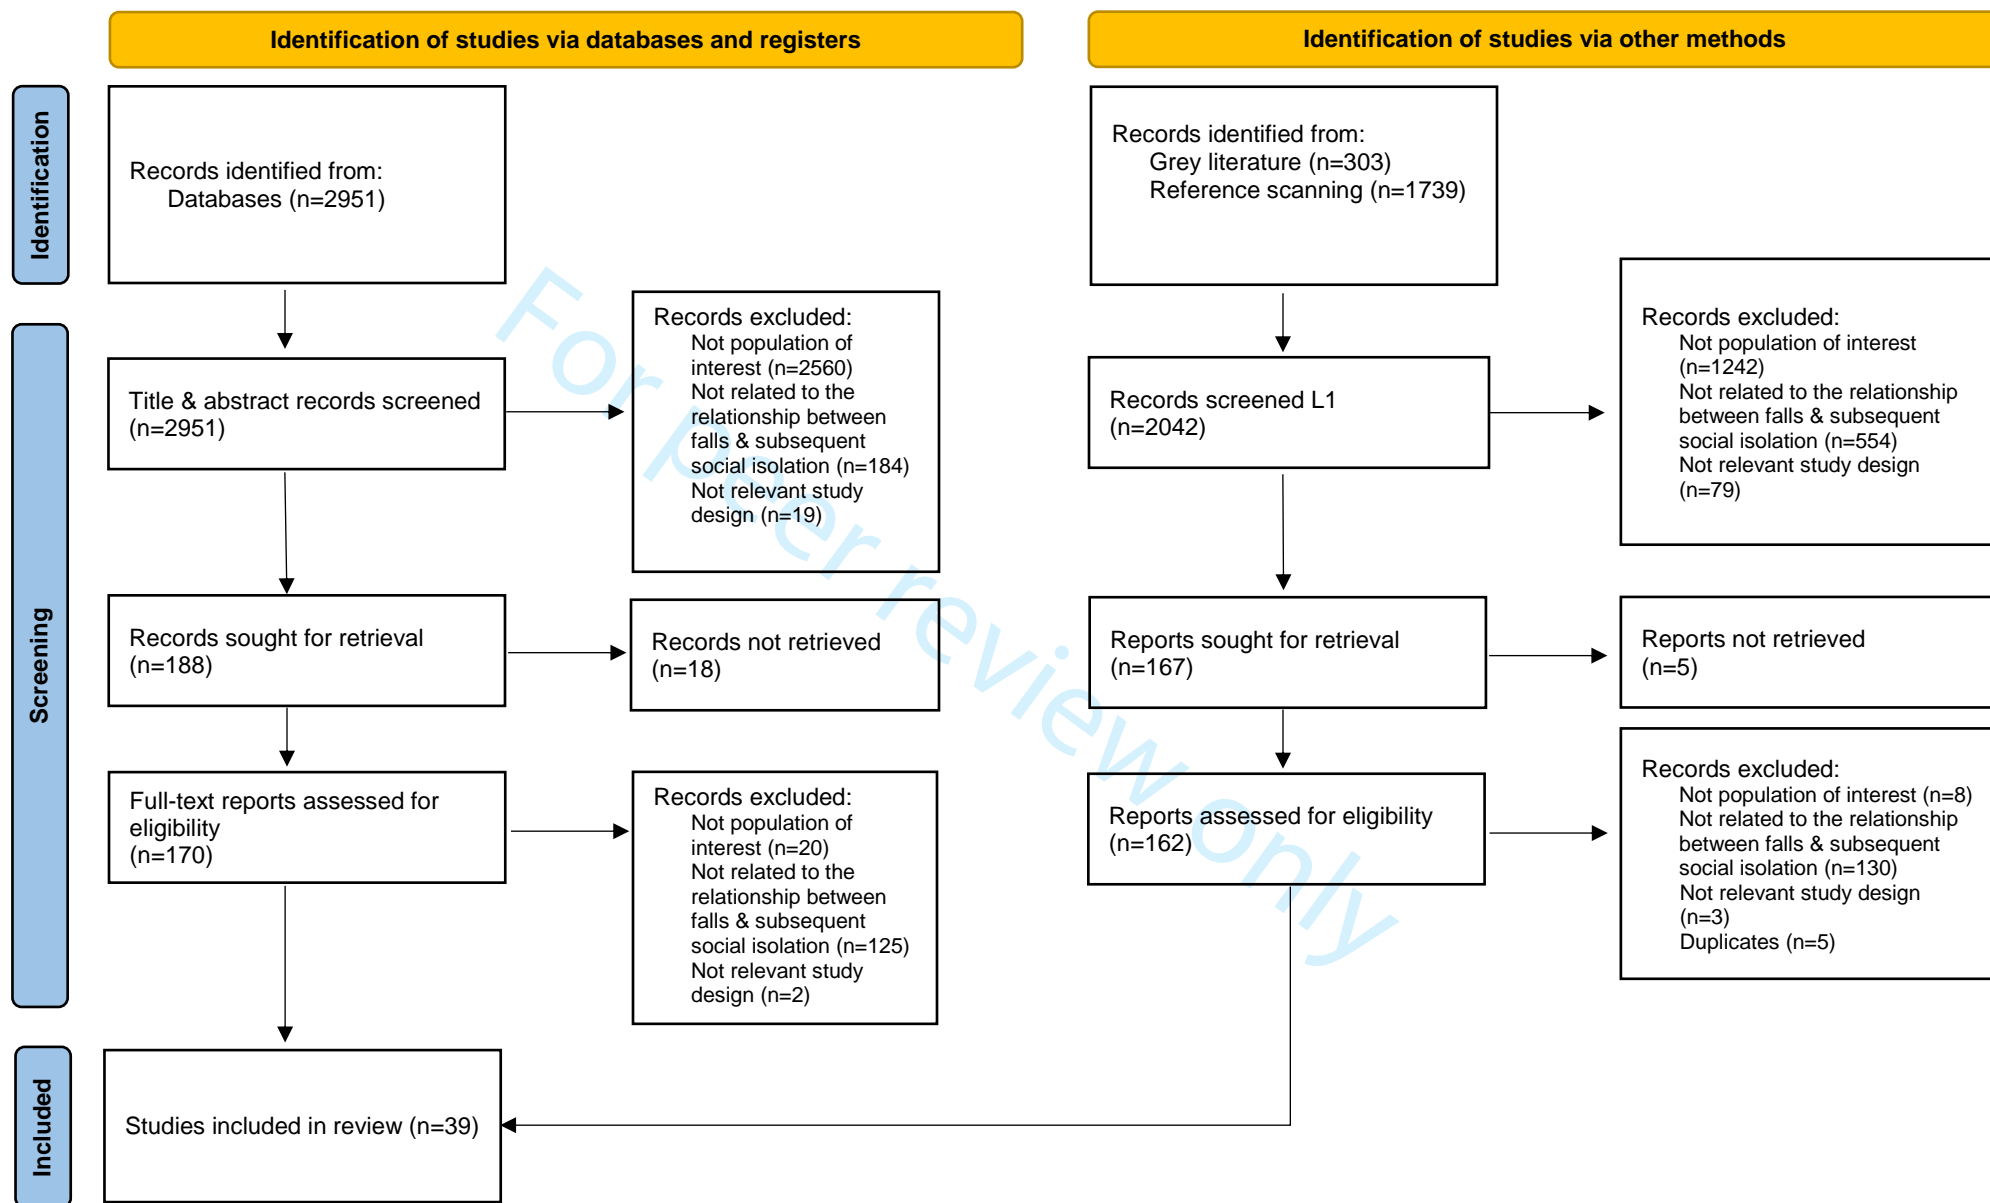

## Supplementary File 2: Appendices

|                                                                                                                               |    |
|-------------------------------------------------------------------------------------------------------------------------------|----|
| Appendix 1: Literature search strategies.....                                                                                 | 2  |
| Appendix 2: Study Characteristics (n=39).....                                                                                 | 4  |
| Appendix 3: Patient Characteristics (n=39).....                                                                               | 8  |
| Appendix 4: Mental health outcomes related to falls, fear of falling, and social isolation (n=6). 15                          |    |
| Appendix 5: Findings from included cohort studies (n=6).....                                                                  | 17 |
| Appendix 6: Cross-sectional studies reporting on falls and social isolation/loneliness (n=11) ...                             | 20 |
| Appendix 7: Cross-sectional studies reporting on fear of falling and activity restriction due to fear of falling (n= 15)..... | 24 |
| Appendix 8: Relevant findings from qualitative studies (n=7).....                                                             | 30 |

## Appendix 1: Literature search strategies

### Ovid MEDLINE(R) ALL <1946 to Jan 11, 2021>

1 Accidental Falls/  
 2 (slip\* or trip\* or stumbl\* or tumbl\*).tw,kf.  
 3 (fall\* or fell or "fall- related" or "near- fall").tw,kf.  
 4 or/1-3  
 5 limit 4 to "all aged (65 and over)"  
 6 exp Aged/ or geriatrics/  
 7 (geriatric\* or elder\* or age\* or "of age" or aging or senior\* or older  
 adult\* or retired or retiree\* or elder\* or pensioner\* or older people or older  
 patient\* or gerontology or Sexagenarian\* or septuagenarian\* or  
 octogenarian or nonagenarian\* or centenarian\* or sixties or seventies or  
 eighties or nineties).tw,kf.  
 8 4 and (6 or 7)  
 9 5 or 8  
 10 Social Isolation/  
 11 loneliness/  
 12 exp social support/  
 13 (social barrier\* or social isolat\* or social support\* or social car\* or  
 psychosocial support\* or psycho-social support\* or social frailt\* or  
 friendship\* or "social\* connected\*" or connectedness or lonely or loneliness  
 or "feel\* alone\*" or companionship).tw,kf.  
 14 ((lack or absence or minimi\*) adj2 (contact or communication or  
 support\*)),tw,kf.  
 15 or/10-14  
 16 9 and 15  
 17 animals/ not humans/  
 18 16 not 17

### PsycINFO <1806 to January Week 2 2021>

1 falls/  
 2 (slip\* or trip\* or stumbl\* or tumbl\*).tw.  
 3 (fall\* or fell or "fall- related" or "near- fall").tw.  
 4 or/1-3  
 5 limit 4 to "380 aged <age 65 yrs and older>"  
 6 (geriatric\* or elder\* or age\* or "of age" or aging or senior\* or older  
 adult\* or retired or retiree\* or elder\* or pensioner\* or older people or older  
 patient\* or gerontology or Sexagenarian\* or septuagenarian\* or

octogenarian or nonagenarian\* or centenarian\* or sixties or seventies or  
 eighties or nineties).tw.  
 7 4 and 6  
 8 5 or 7  
 9 social isolation/ or loneliness/ or social support/ or friendship/  
 10 (social barrier\* or social isolat\* or social support\* or social car\* or  
 psychosocial support\* or psycho-social support\* or social frailt\* or  
 friendship\* or "social\* connected\*" or connectedness or lonely or loneliness  
 or "feel\* alone\*" or companionship).tw.  
 11 ((lack or absence or minimi\*) adj2 (contact or communication or  
 support\*)),tw.  
 12 or/9-11  
 13 8 and 12  
 14 Limit 13 to human

### Embase Classic+Embase <1947 to 2021 January 11>

1 falling/  
 2 (slip\* or trip\* or stumbl\* or tumbl\*).tw.  
 3 (fall\* or fell or "fall- related" or "near- fall").tw.  
 4 or/1-3  
 5 limit 4 to aged <65+ years>  
 6 loneliness/ or social support/ or friendship/  
 7 exp social isolation/  
 8 (social barrier\* or social isolat\* or social support\* or social car\* or  
 psychosocial support\* or psycho-social support\* or social frailt\* or  
 friendship\* or "social\* connected\*" or connectedness or lonely or loneliness  
 or "feel\* alone\*" or companionship).tw.  
 9 ((lack or absence or minimi\*) adj2 (contact or communication or  
 support\*)),tw.  
 10 or/6-9  
 11 5 and 10  
 12 limit 11 to human

### Database: EBM Reviews - Cochrane Database of Systematic Reviews <2005 to January 11, 2021>, EBM Reviews - ACP Journal Club <1991 to January 11, 2021>, EBM Reviews - Cochrane Clinical Answers <January 2021>, EBM Reviews - Database of Abstracts of Reviews of Effects <1st Quarter 2016>

1 (slip\* or trip\* or stumbl\* or tumbl\*).mp.  
 2 (fall\* or fell or "fall- related" or "near- fall").mp.

1  
2  
3 1 or 2  
4 (geriatric\* or elder\* or age\* or "of age" or aging or senior\* or older  
5 adult\* or retired or retiree\* or elder\* or pensioner\* or older people or older  
6 patient\* or gerontology or Sexagenarian\* or septuagenarian\* or  
7 octogenarian or nonagenarian\* or centenarian\* or sixties or seventies or  
8 eighties or nineties).mp.  
9 3 and 4  
10 6 (social barrier\* or social isolat\* or social support\* or social car\* or  
11 psychosocial support\* or psycho-social support\* or social frailt\* or  
12 friendship\* or "social\* connected\*" or connectedness or lonely or loneliness  
13 or "feel\* alone\*" or companionship).mp.  
14 7 ((lack or absence or minimi\*) adj2 (contact or communication or  
15 support\*)).mp.  
16 8 6 or 7  
17 9 5 and 8

#### Joanna Briggs Institute EBP Database - <Current to January 11, 2021>

1 (slip\* or trip\* or stumbl\* or tumbl\*).mp.  
2 (fall\* or fell or "fall- related" or "near- fall").mp.  
3 1 or 2  
4 (geriatric\* or elder\* or age\* or "of age" or aging or senior\* or older  
5 adult\* or retired or retiree\* or elder\* or pensioner\* or older people or older  
6 patient\* or gerontology or Sexagenarian\* or septuagenarian\* or  
7 octogenarian or nonagenarian\* or centenarian\* or sixties or seventies or  
8 eighties or nineties).mp.  
9 3 and 4  
10 6 (social barrier\* or social isolation\* or social support\* or social car\* or  
11 psychosocial support\* or psycho-social support\* or social frailt\* or  
12 friendship\* or "social\* connected\*" or connectedness or lonely or loneliness  
13 or "feel\* alone\*" or companionship).mp.  
14 7 ((lack or absence or minimi\*) adj2 (contact or communication or  
15 support\*)).mp.  
16 8 6 or 7  
17 9 5 and 8

#### AMED (Allied and Complementary Medicine) <1985 to January 2021>

1 (slip\* or trip\* or stumbl\* or tumbl\*).mp.  
2 (fall\* or fell or "fall- related" or "near- fall").mp.  
3 1 or 2

4 (geriatric\* or elder\* or age\* or "of age" or aging or senior\* or older  
5 adult\* or retired or retiree\* or elder\* or pensioner\* or older people or older  
6 patient\* or gerontology or Sexagenarian\* or septuagenarian\* or  
7 octogenarian or nonagenarian\* or centenarian\* or sixties or seventies or  
8 eighties or nineties).mp.  
9 3 and 4  
10 6 (social barrier\* or social isolation\* or social support\* or social car\* or  
11 psychosocial support\* or psycho-social support\* or social frailt\* or  
12 friendship\* or "social\* connected\*" or connectedness or lonely or loneliness  
13 or "feel\* alone\*" or companionship).mp.  
14 7 ((lack or absence or minimi\*) adj2 (contact or communication or  
15 support\*)).mp.  
16 8 6 or 7  
17 9 5 and 8

## Appendix 2: Study Characteristics (n=39)

| Author, year        | Study title                                                                                                                               | Journal name                                                                   | Country     | Study design    | Study duration (months) |
|---------------------|-------------------------------------------------------------------------------------------------------------------------------------------|--------------------------------------------------------------------------------|-------------|-----------------|-------------------------|
| Apikomkon, 2003[26] | Fear of falling and fall circumstances in Thailand                                                                                        | NA                                                                             | Thailand    | cross-sectional | NA                      |
| Chiu, 2011[37]      | Psychosocial responses to falling in older Chinese immigrants living in the community                                                     | Dissertation Abstracts International Section A: Humanities and Social Sciences | Canada      | qualitative     | 6                       |
| Choi, 2015[30]      | Characteristics associated with fear of falling and activity restriction in South Korean older adults                                     | Journal of Aging and Health                                                    | South Korea | cross-sectional | NA                      |
| Curcio, 2009[4]     | Activity restriction related to fear of falling among older people in the Colombian Andes Mountain                                        | Journal of Aging and Health                                                    | Columbia    | cross-sectional | NA                      |
| Dias, 2011[5]       | Characteristics associated with activity restriction induced by fear of falling in community-dwelling elderly                             | Revista Brasileira de Fisioterapia                                             | Brazil      | cross-sectional | NA                      |
| Faes, 2010[36]      | Qualitative study on the impact of falling in frail older persons and family caregivers: Foundations for an intervention to prevent falls | Aging & Mental Health                                                          | Netherlands | qualitative     | NA                      |
| Faria, 2020[22]     | Elderly residents in the community: gaining knowledge to support a rehabilitation nursing program                                         | Revista Brasileira de Enfermagem                                               | Portugal    | cross-sectional | NA                      |
| Ferreira, 2018[31]  | Aspects of social participation and neighborhood perception: ELSI-Brazil                                                                  | Revista de saude Publica                                                       | Brazil      | cross sectional | NA                      |
| Finn, 2001[14]      | The relationship between falls and fall-related efficacy, depression, and social resources                                                | Dissertation Abstracts International: Section B: The Sciences and Engineering  | USA         | cross-sectional | NA                      |
| Gagnon, 2005[3]     | Affective correlates of fear of falling in elderly persons                                                                                | American Journal of Geriatric Psychiatry                                       | Canada      | cross-sectional | NA                      |
| Hajek, 2017[20]     | The association of falls with loneliness and social exclusion: evidence from the DEAS German Ageing Survey                                | BMC Geriatrics                                                                 | Germany     | cross-sectional | NA                      |

|                           |                                                                                                                                                                                       |                                                 |                                                                  |                 |    |
|---------------------------|---------------------------------------------------------------------------------------------------------------------------------------------------------------------------------------|-------------------------------------------------|------------------------------------------------------------------|-----------------|----|
| Hajek, 2020[13]           | What are the psychosocial consequences when fear of falling starts or ends? Evidence from an asymmetric fixed effects analysis based on longitudinal data from the general population | International Journal of Geriatric Psychiatry   | Germany                                                          | cohort          | 36 |
| Host, 2011[38]            | Older people's perception of and coping with falling, and their motivation for fall-prevention programmes                                                                             | Scandinavian Journal of Public Health           | Denmark                                                          | qualitative     | 2  |
| Howland, 1998[25]         | Covariates of fear of falling and associated activity curtailment                                                                                                                     | The Gerontological Society of America           | USA                                                              | cross-sectional | NA |
| Iliffe, 2007[16]          | Health risk appraisal in older people 2: the implications for clinicians and commissioners of social isolation risk in older people                                                   | British Journal of General Practice             | England                                                          | cross-sectional | NA |
| Kara, 2009[28]            | Evaluation of home environment and life satisfaction and falling in geriatrics: Examination of its relationship with fear                                                             | Physiotherapy Rehabilitation                    | Turkey                                                           | cross-sectional | NA |
| Mendes da Costa, 2012[29] | Fear of falling and associated activity restriction in older people. results of a cross-sectional study conducted in a Belgian town                                                   | Archives of Public Health                       | Belgium                                                          | cross-sectional | NA |
| Merchant, 2020[7]         | Relationship between fear of falling, fear-related activity restriction, frailty, and sarcopenia                                                                                      | Journal of the American Geriatrics Society      | Singapore                                                        | cross-sectional | NA |
| Meric, 2007[34]           | A qualitative study on the perceptions of old individuals regarding the life of the fall and its effect on their daily lives                                                          | Turkish Journal of Geriatrics                   | Turkey                                                           | qualitative     | 2  |
| Murphy, 2002[1]           | Characteristics associated with fear of falling and activity restriction in community-living older Persons                                                                            | Journal of the American Geriatrics Society      | USA                                                              | cross-sectional | NA |
| Nakaya, 2013[6]           | The association between self-reported history of physical diseases and psychological distress in a community-dwelling Japanese population: the Ohsaki Cohort 2006 Study               | European Journal of Public Health               | Japan                                                            | cross-sectional | NA |
| Nicholson, 2005[15]       | The relationship between injurious falls, fear of falling, social isolation, and depression                                                                                           | NA                                              | USA                                                              | cross-sectional | NA |
| Petrinec, 2020[32]        | Health-related quality of life of older women religious: negative influence of frailty                                                                                                | Western Journal of Nursing Research             | USA                                                              | cross-sectional | NA |
| Pin, 2016[11]             | Impact of falling on social participation and social support trajectories in a middle-aged and elderly European sample                                                                | Social Science and Medicine - Population Health | Denmark, Sweden, Netherlands, Austria, Germany, France, Belgium, | cohort          | 72 |



|                           |                                                                                                                                                  |                                                                               |                           |                 |    |
|---------------------------|--------------------------------------------------------------------------------------------------------------------------------------------------|-------------------------------------------------------------------------------|---------------------------|-----------------|----|
|                           |                                                                                                                                                  |                                                                               | Switzerland, Italy, Spain |                 |    |
| Quach, 2016[19]           | Social determinants of falls: The role of social support and depression among community-dwelling older adults                                    | Dissertation Abstracts International: Section B: The Sciences and Engineering | USA                       | cohort          | 36 |
| Robins, 2018[21]          | The association between physical activity and social isolation in community-dwelling older adults                                                | Aging & Mental Health                                                         | Australia                 | cross-sectional | NA |
| Schmid, 2009[35]          | Consequences of poststroke falls: activity limitation, increased dependence, and the development of fear of falling                              | American Journal of Occupational Therapy                                      | USA                       | qualitative     | 6  |
| Schnittger, 2012[18]      | Risk factors and mediating pathways of loneliness and social support in community-dwelling older adults                                          | Aging & Mental Health                                                         | Ireland                   | cross-sectional | NA |
| Stel, 2004[2]             | Consequences of falling in older men and women and risk factors for health service use and functional decline                                    | Age and Ageing                                                                | Netherlands               | cross-sectional | NA |
| Tinetti, 1998[9]          | The effect of falls and fall injuries on functioning in community-dwelling older persons                                                         | Journal of Gerontology                                                        | USA                       | cohort          | 36 |
| Tinetti, 1994[24]         | Fear of falling and fall-related efficacy in relationship to functioning among community-living elders                                           | Journal of Gerontology                                                        | USA                       | cross-sectional | NA |
| van der Meulen, 2014[10]  | Effect of fall-related concerns on physical, mental, and social function in community-dwelling older adults: A prospective cohort study          | Journal of American Geriatrics Society                                        | Netherlands               | cohort          | 14 |
| van Lankveld, 2011[17]    | Age-related health hazards in old patients with first-time referral to a rheumatologist: A descriptive study                                     | Arthritis                                                                     | Netherlands               | cross sectional | NA |
| Vanden Wyngaert, 2020[23] | Associations between the measures of physical function, risk of falls and the quality of life in haemodialysis patients: a cross-sectional study | BMC Nephrology                                                                | Belgium                   |                 |    |
| Vellas, 1987[8]           | Prospective study of restriction of activity in old people after falls                                                                           | Age and Ageing                                                                | France                    | cohort          | 6  |
| Ward-Griffin, 2004[33]    | Falls and fear of falling among community dwelling seniors: the dynamic tension between exercising precaution and striving for independence      | Canadian Journal on Aging                                                     | Canada                    | qualitative     | NA |

1  
2  
3  
4  
5  
6  
7  
8  
9  
10  
11  
12  
13  
14  
15  
16  
17  
18  
19  
20  
21  
22  
23  
24  
25  
26  
27  
28  
29  
30  
31  
32  
33  
34  
35  
36  
37  
38  
39  
40  
41  
42  
43  
44  
45  
46  
47

|                    |                                                                                                                                               |                                                       |             |                 |    |
|--------------------|-----------------------------------------------------------------------------------------------------------------------------------------------|-------------------------------------------------------|-------------|-----------------|----|
| Xu, 2019[39]       | Developing a falls prevention program for community-dwelling stroke survivors in Singapore: client and caregiver perspectives                 | Disability and Rehabilitation                         | Singapore   | qualitative     | NA |
| Yu, 2020[12]       | Longitudinal Assessment of the relationships between geriatric conditions and loneliness                                                      | Journal of the American Medical Directors Association | USA         | cohort          | 96 |
| Zijlstra, 2007[27] | Prevalence and correlates of fear of falling, and associated avoidance of activity in the general population of community-living older people | Age and Ageing                                        | Netherlands | cross-sectional | NA |

For peer review only

## Appendix 3: Patient Characteristics (n=39)

| DEMOGRAPHIC DATA          |                     |                     |                    |                              |                             |          |        |
|---------------------------|---------------------|---------------------|--------------------|------------------------------|-----------------------------|----------|--------|
| Author, year              | Overall sample size | Overall age (years) | Overall age (type) | Overall age variance (value) | Overall age variance (type) | % female | % male |
| Apikomokon, 2003[26]      | 546                 | NR                  | NR                 | 60-94                        | range                       | 61       | 39     |
| Chiu, 2011[37]            | 18                  | 81                  | mean               | 71 to 94                     | range                       | 88.9     | 11.1   |
| Choi, 2015[30]            | 4,247               | NR                  | NR                 | NR                           | NR                          | NR       | NR     |
| Curcio, 2009[4]           | 1668                | 70.9                | mean               | 7.4                          | SD                          | 54.5     | 45.5   |
| Dias, 2011[5]             | 113                 | 74.5                | mean               | 7                            | SD                          | 85       | 15     |
| Faes, 2010[36]            | 10                  | 70-90               | range              | NR                           | NR                          | 60       | 40     |
| Faria, 2020[22]           | 48                  | 75                  | mean               | 6.8                          | SD                          | 66.67    | 33.33  |
| Ferreira, 2018[31]        | 7935                | NR                  | NR                 | NR                           | NR                          | 56.9     | 43.1   |
| Finn, 2001[14]            | 49                  | NR                  | mean               | NR                           | SD                          | NR       | NR     |
| Gagnon, 2005[3]           | 105                 | 78.2                | mean               | 8.9                          | SD                          | 86.7     | 13.3   |
| Hajek, 2017[20]           | 7808                | 73.8                | mean               | 5.9                          | SD                          | 46.2     | 53.8   |
| Hajek, 2020[13]           | 8836                | 65.5                | mean               | 10.7                         | SD                          | 50.4     | 49.6   |
| Host, 2011[38]            | 14                  | 77                  | mean               | 68-87                        | range                       | 64.3     | 35.7   |
| Howland, 1998[25]         | 266                 | 76.3                | mean               | 7.9                          | SD                          | 77       | 23     |
| Illiffe, 2007[16]         | 3139                | NR                  | NR                 | 65-75+                       | range                       | 54.5     | 45.5   |
| Kara, 2009[28]            | 47                  | 71.7                | mean               | 5.6                          | SD                          | 55.3     | 44.7   |
| Mendes da Costa, 2012[29] | 501                 | NR                  | NR                 | 65-85+                       | NR                          | 57.7     | 42.3   |
| Merchant, 2020[7]         | 493                 | 73                  | mean               | 8                            | SD                          | 79.3     | 20.7   |
| Meric, 2007[34]           | 22                  | NR                  | NR                 | 65-83+                       | range                       | 63.6     | 36.4   |
| Murphy, 2002[1]           | 1064                | 79.6                | mean               | 5.3                          | SD                          | 73       | 27     |
| Nakaya, 2013[6]           | 43487               | 65+                 | range              | NR                           | NR                          | 53.9     | 46.1   |
| Nicholson, 2005[15]       | 68                  | 78.5                | mean               | 6.3                          | SD                          | 60.4     | 39.6   |
| Petrinec, 2020[32]        | 108                 | 75.6                | mean               | 65-93                        | range                       | 100      | 0      |
| Pin, 2016[11]             | 16583               | 50-95               | range              | NR                           | NR                          | NR       | NR     |
| Quach, 2016[19]           | 8464                | 74                  | mean               | 7                            | SD                          | 58.7     | 41.3   |
| Robins, 2018[21]          | 245                 | 77                  | mean               | 6                            | SD                          | 60       | 40     |
| Schmid, 2009[35]          | 42                  | 67.5                | mean               | 11.93                        | SD                          | NR       | NR     |
| Schnittger, 2012[18]      | 579                 | NR                  | NR                 | NR                           | NR                          | 69.1     | 30.9   |
| Stel, 2004[2]             | 204                 | 78.7                | mean               | 6.3                          | SD                          | 54.9     | 45.1   |
| Tinetti, 1998[9]          | 1103                | NR                  | NR                 | NR                           | NR                          | NR       | NR     |
| Tinetti, 1994[24]         | 1103                | 79.6                | mean               | 5.2                          | SD                          | 73       | 27     |

|                           |      |        |       |       |       |      |      |
|---------------------------|------|--------|-------|-------|-------|------|------|
| van der Meulen, 2014[10]  | 260  | 77.9   | mean  | 5     | SD    | 72.7 | 27.3 |
| van Lankveld, 2011[17]    | 154  | 79.2   | mean  | 5.1   | SD    | 79   | 21   |
| Vanden Wyngaert, 2020[23] | 113  | 67.5   | mean  | 16    | SD    | 42.5 | 57.5 |
| Vellas, 1987[8]           | 178  | 65-85+ | range | NR    | NR    | 76.4 | 23.6 |
| Ward-Griffin, 2004[33]    | 9    | 81.7   | mean  | 72-92 | range | 77.7 | 22.3 |
| Xu, 2019[39]              | 17   | 65     | mean  | 7     | SD    | 44.4 | 55.6 |
| Yu, 2020[12]              | 4680 | 74.01  | mean  | 9.69  | SD    | 56.1 | 43.9 |
| Zijlstra, 2007[27]        | 4376 | 77.1   | mean  | 4.9   | SD    | 59.9 | 40.1 |

| SETTING DATA        |                                                               |                                 |                               |                                                                                                                                                                                                                         |
|---------------------|---------------------------------------------------------------|---------------------------------|-------------------------------|-------------------------------------------------------------------------------------------------------------------------------------------------------------------------------------------------------------------------|
| Author, year        | Setting                                                       | Streamlined setting description | Participants living alone (%) | Description of access to caregivers                                                                                                                                                                                     |
| Apikomkon, 2003[26] | Community in 4 provinces of Thailand                          | Community                       | 9.9                           | NR                                                                                                                                                                                                                      |
| Chiu, 2011[37]      | Community in the Greater Toronto Area, Canada                 | Community                       | 61                            | Two respondents lived with their children. The rest lived alone or only with their spouse. Only seven of 18 respondents had at least one grown child living in the same city, who might provide assistance when needed. |
| Choi, 2015[30]      | Community setting in Korea                                    | Community                       | NR                            | NR                                                                                                                                                                                                                      |
| Curcio, 2009[4]     | Community in Columbian Andes Mountains                        | Community                       | 9.5                           | NR                                                                                                                                                                                                                      |
| Dias, 2011[5]       | Community setting in Brazil                                   | Community                       | 38                            | NR                                                                                                                                                                                                                      |
| Faes, 2010[36]      | Home and outpatient clinic in Netherlands                     | Community + Medical             | 10                            | All participants had access to a caregiver (either child or spouse)                                                                                                                                                     |
| Faria, 2020[22]     | Urban health unit in northern Portugal                        | Medical                         | NR                            | NR                                                                                                                                                                                                                      |
| Ferreira, 2018[31]  | Urban communities in Brazil                                   | Community                       | NR                            | NR                                                                                                                                                                                                                      |
| Finn, 2001[14]      | Two nursing homes in the Chicago Metropolitan Area, USA       | Nursing home                    | 0                             | In general, they have entered a nursing home because of an inability to adequately care for themselves, and they do not have anyone who can ably assist them, or they lack financial resources.                         |
| Gagnon, 2005[3]     | Medical or orthopedic wards of 3 hospitals in Toronto, Canada | Medical                         | 65.7                          | NR                                                                                                                                                                                                                      |
| Hajek, 2017[20]     | Communities in Germany                                        | Community                       | NR                            | NR                                                                                                                                                                                                                      |

|                           |                                                                                                                                           |           |      |                                                                                                         |
|---------------------------|-------------------------------------------------------------------------------------------------------------------------------------------|-----------|------|---------------------------------------------------------------------------------------------------------|
| Hajek, 2020[13]           | Community in Germany                                                                                                                      | Community | 28.9 | NR                                                                                                      |
| Host, 2011[38]            | Copenhagen area in Denmark                                                                                                                | Community | 64.3 | NR                                                                                                      |
| Howland, 1998[25]         | Communities in Eastern Massachusetts                                                                                                      | Community | 87   | NR                                                                                                      |
| Iiliffe, 2007[16]         | Community in London, England                                                                                                              | Community | 32.8 | NR                                                                                                      |
| Kara, 2009[28]            | Districts of Narlıdere, Gülbahçe and Mordoğan in Izmir, Turkey                                                                            | Community | 27.7 | NR                                                                                                      |
| Mendes da Costa, 2012[29] | Community in Walloon region of Belgium                                                                                                    | Community | 36.4 | NR                                                                                                      |
| Merchant, 2020[7]         | Community in northwest region of Singapore                                                                                                | Community | NR   | NR                                                                                                      |
| Meric, 2007[34]           | Geriatric Outpatient of Gülhane Military Medical Academy in Turkey                                                                        | Medical   | 13.6 | NR                                                                                                      |
| Murphy, 2002[1]           | Community setting in New Haven, Connecticut, USA                                                                                          | Community | 70   | NR                                                                                                      |
| Nakaya, 2013[6]           | Community in Japan                                                                                                                        | Community | NR   | 87.3% reported sufficient social support, 12.2% reported lack of social support, 4.2% unknown.          |
| Nicholson, 2005[15]       | Community in United States                                                                                                                | Community | 53.4 | NR                                                                                                      |
| Petrinec, 2020[32]        | Cleveland Catholic Diocese in USA                                                                                                         | Community | 100  | Participants were not included if they needed caregiver assistance.                                     |
| Pin, 2016[11]             | Communities in 10 European Countries (Denmark, Sweden, The Netherlands, Austria, Germany, France, Belgium, Switzerland, Italy, and Spain) | Community | NR   | NR                                                                                                      |
| Quach, 2016[19]           | Communities in USA                                                                                                                        | Community | 23.3 | One-third did not have the perceived support with basic personal care (eating or dressing) when needed. |
| Robins, 2018[21]          | Communities in Australia                                                                                                                  | Community | 49   | NR                                                                                                      |
| Schmid, 2009[35]          | Community in United States                                                                                                                | Community | NR   | All participants had a caregiver.                                                                       |
| Schnittger, 2012[18]      | Technology Research for Independent Living (TRIL) clinic at St James's Hospital, Dublin.                                                  | Medical   | NR   | NR                                                                                                      |
| Stel, 2004[2]             | Community in three regions in the Netherlands                                                                                             | Community | NR   | NR                                                                                                      |

1  
2  
3  
4  
5  
6  
7  
8  
9  
10  
11  
12  
13  
14  
15  
16  
17  
18  
19  
20  
21  
22  
23  
24  
25  
26  
27  
28  
29  
30  
31  
32  
33  
34  
35  
36  
37  
38  
39  
40  
41  
42  
43  
44  
45  
46  
47

|                           |                                                                                                     |           |      |                                                                                                                          |
|---------------------------|-----------------------------------------------------------------------------------------------------|-----------|------|--------------------------------------------------------------------------------------------------------------------------|
| Tinetti, 1998[9]          | Community in New Haven, Connecticut, USA                                                            | Community | NR   | NR                                                                                                                       |
| Tinetti, 1994[24]         | Community in New Haven, Connecticut, USA                                                            | Community | 69   | NR                                                                                                                       |
| van der Meulen, 2014[10]  | Community in the Netherlands                                                                        | Community | 53.1 | NA                                                                                                                       |
| van Lankveld, 2011[17]    | Community in the Netherlands                                                                        | Community | NR   | NR                                                                                                                       |
| Vanden Wyngaert, 2020[23] | Dialysis centres in Belgium                                                                         | Medical   | NR   | NR                                                                                                                       |
| Vellas, 1987[8]           | Community in Toulouse, France                                                                       | Community | NR   | NR                                                                                                                       |
| Ward-Griffin, 2004[33]    | Community in Canada (11 senior apartment towers and in the Health Information and Promotion Centre) | Community | 77.7 | NR                                                                                                                       |
| Xu, 2019[39]              | Community rehabilitation centers in Singapore                                                       | Medical   | 0    | Four family caregivers (two male) and four maids (all female) were interviewed. 33% employed a maid as a main caregiver. |
| Yu, 2020[12]              | Community in USA                                                                                    | Community | NR   | NR                                                                                                                       |
| Zijlstra, 2007[27]        | Community in two urban areas in the Netherlands                                                     | Community | 44   | NR                                                                                                                       |

| FALLS AND FRAILITY DATA |                                          |                                                                                                                                   |                               |               |                       |                            |                        |                       |
|-------------------------|------------------------------------------|-----------------------------------------------------------------------------------------------------------------------------------|-------------------------------|---------------|-----------------------|----------------------------|------------------------|-----------------------|
| Author, year            | Participants with history of falling (%) | List of comorbidities [comorbidity 1 (%), etc.]                                                                                   | Participants with frailty (%) | Frailty scale | Overall frailty score | Overall frailty score type | Frailty variance value | Frailty variance type |
| Apikomokon, 2003[26]    | 21                                       | NR                                                                                                                                | NR                            | NR            | NR                    | NR                         | NR                     | NR                    |
| Chiu, 2011[37]          | 100                                      | All participants reported having chronic conditions. The most common physical conditions reported were diabetes and hypertension. | NR                            | NR            | NR                    | NR                         | NR                     | NR                    |
| Choi, 2015[30]          | NR                                       | NR                                                                                                                                | NR                            | NR            | NR                    | NR                         | NR                     | NR                    |
| Curcio, 2009[4]         | 31.9                                     | Hypertension (53.0), Osteoarthritis (39.2), heart disease (20.2), COPD                                                            | NR                            | NR            | NR                    | NR                         | NR                     | NR                    |

|                           |            |                                                                                                                                                                                          |      |             |    |    |    |    |
|---------------------------|------------|------------------------------------------------------------------------------------------------------------------------------------------------------------------------------------------|------|-------------|----|----|----|----|
|                           |            | (16.8), Diabetes Mellitus (13.4), Lower extremities fracture (11.7), Pain in joints (33.1), Dizziness (15.2), Breathlessness (11.4), Hearing impairment (33.0), visual impairment (68.9) |      |             |    |    |    |    |
| Dias, 2011[5]             | NR         | NR                                                                                                                                                                                       | NR   | NR          | NR | NR | NR | NR |
| Faes, 2010[36]            | 100        | Cognitive impairment (70%)                                                                                                                                                               | NR   | NR          | NR | NR | NR | NR |
| Faria, 2020[22]           | 25         | Cardiovascular diseases (76.6), endocrine diseases (56.8), musculoskeletal diseases (45.7), depression (16.3), respiratory diseases (14.3) and cerebrovascular diseases (9.3).           | NR   | NR          | NR | NR | NR | NR |
| Ferreira, 2018[31]        | NR         | Overweight (women=65.2%, men=59.0%)                                                                                                                                                      | NR   | NR          | NR | NR | NR | NR |
| Finn, 2001[14]            | 51         | NR                                                                                                                                                                                       | NR   | NR          | NR | NR | NR | NR |
| Gagnon, 2005[3]           | 100        | NR                                                                                                                                                                                       | NR   | NR          | NR | NR | NR | NR |
| Hajek, 2017[20]           | 17.6       | NR                                                                                                                                                                                       | NR   | NR          | NR | NR | NR | NR |
| Hajek, 2020[13]           | NR         | Number of physical illnesses is mean = 2.6, SD = 1.9                                                                                                                                     | NR   | NR          | NR | NR | NR | NR |
| Host, 2011[38]            | 100        | NR                                                                                                                                                                                       | NR   | NR          | NR | NR | NR | NR |
| Howland, 1998[25]         | 35         | Vision problems (26), stroke (11), dizziness (29)                                                                                                                                        | NR   | NR          | NR | NR | NR | NR |
| Iiliffe, 2007[16]         | 11.20      | Two or more chronic conditions (59.0%), takes 4 or more meds (33.4%)                                                                                                                     | NR   | NR          | NR | NR | NR | NR |
| Kara, 2009[28]            | 29.9       | NR                                                                                                                                                                                       | NR   | NR          | NR | NR | NR | NR |
| Mendes da Costa, 2012[29] | 31.6       | NR                                                                                                                                                                                       | NR   | NR          | NR | NR | NR | NR |
| Merchant, 2020[7]         | mean = 0.4 | NR                                                                                                                                                                                       | 51.3 | FRAIL scale | NR | NR | NR | NR |
| Meric, 2007[34]           | 81         | NR                                                                                                                                                                                       | NR   | NR          | NR | NR | NR | NR |
| Murphy, 2002[1]           | 39.70      | Chronic dizziness (24.2), 5 or more medications (35.8), vision impairment (40.5)                                                                                                         | NR   | NR          | NR | NR | NR | NR |
| Nakaya, 2013[6]           | 17.3       | NR                                                                                                                                                                                       | NR   | NR          | NR | NR | NR | NR |
| Nicholson, 2005[15]       | 100        | NR                                                                                                                                                                                       | NR   | NR          | NR | NR | NR | NR |

1  
2  
3  
4  
5  
6  
7  
8  
9  
10  
11  
12  
13  
14  
15  
16  
17  
18  
19  
20  
21  
22  
23  
24  
25  
26  
27  
28  
29  
30  
31  
32  
33  
34  
35  
36  
37  
38  
39  
40  
41  
42  
43  
44  
45  
46  
47

|                           |      |                                                                                                                                                                                                                                                                                                                                                                                                                                                                                                       |    |                                 |    |    |    |    |
|---------------------------|------|-------------------------------------------------------------------------------------------------------------------------------------------------------------------------------------------------------------------------------------------------------------------------------------------------------------------------------------------------------------------------------------------------------------------------------------------------------------------------------------------------------|----|---------------------------------|----|----|----|----|
| Petrinec, 2020[32]        | NR   | Hypertension (60), Cataracts (60), Thyroid disorders (30), Osteoporosis (17), Diabetes (7)                                                                                                                                                                                                                                                                                                                                                                                                            | 19 | Tilburg Frailty Indicator (TFI) | NR | NR | NR | NR |
| Pin, 2016[11]             | 2.8  | NR                                                                                                                                                                                                                                                                                                                                                                                                                                                                                                    | NR | NR                              | NR | NR | NR | NR |
| Quach, 2016[19]           | 38.0 | NR                                                                                                                                                                                                                                                                                                                                                                                                                                                                                                    | NR | NR                              | NR | NR | NR | NR |
| Robins, 2018[21]          | 38   | Congestive heart failure (4%); Heart disease (33%); stroke (9%); Cancer (25%); diabetes (18%); lung disease (16%); Parkinson's disease (1%)                                                                                                                                                                                                                                                                                                                                                           | NR | NR                              | NR | NR | NR | NR |
| Schmid, 2009[35]          | NR   | Stroke (100%)                                                                                                                                                                                                                                                                                                                                                                                                                                                                                         | NR | NR                              | NR | NR | NR | NR |
| Schnittger, 2012[18]      | NR   | NR                                                                                                                                                                                                                                                                                                                                                                                                                                                                                                    | NR | NR                              | NR | NR | NR | NR |
| Stel, 2004[2]             | 100  | Dizziness (27.9%), visual impairment (23%)                                                                                                                                                                                                                                                                                                                                                                                                                                                            | NR | NR                              | NR | NR | NR | NR |
| Tinetti, 1998[9]          | 30.3 | NR                                                                                                                                                                                                                                                                                                                                                                                                                                                                                                    | NR | NR                              | NR | NR | NR | NR |
| Tinetti, 1994[24]         | 39   | One or more chronic conditions (78%)                                                                                                                                                                                                                                                                                                                                                                                                                                                                  | NR | NR                              | NR | NR | NR | NR |
| van der Meulen, 2014[10]  | 55.5 | NA                                                                                                                                                                                                                                                                                                                                                                                                                                                                                                    | NR | NA                              | NA | NA | NA | NA |
| van Lankveld, 2011[17]    | 44   | Cardiac 36%, hypertension 40%, vascular 25%, respiratory 12%, EENT 21%, upper GI 14%, lower GI 10%, Hepatic 3%, kidney 3%, other GU 16%, neurological 18%, endocrine 21%, psychiatric 8%, Rheumatic disease general (56%), Osteoarthritis (49%), Spondylosis(31%), Rheumatoid arthritis(17%), Arthritis otherwise defined (12%), Gout (6%), Chodrocalcinosis (12%), Osteoporosis (1%), Shoulder problem (6%), Polymyalgia rheumatica (3%), Soft tissue (1%), Carpal tunnel syndrome (2%), Others (6%) | NR | NR                              | NR | NR | NR | NR |
| Vanden Wyngaert, 2020[23] | NR   | Cardiovascular disease (74.3%) diabetes (46.0%) musculoskeletal complications (44.2%), Neuropathy (28.3), retinopathy (31.9), respiratory complications (24.8), hepatopathy (17.7), pain (27.4%), depression                                                                                                                                                                                                                                                                                          | NR | NR                              | NR | NR | NR | NR |



|                        |            |                                                                       |    |    |    |    |    |    |
|------------------------|------------|-----------------------------------------------------------------------|----|----|----|----|----|----|
|                        |            | (23.9%), fatigue (18.6%), anxiety (15.0%), sleep disturbances (12.4%) |    |    |    |    |    |    |
| Vellas, 1987[8]        | 50         | NR                                                                    | NR | NR | NR | NR | NR | NR |
| Ward-Griffin, 2004[33] | NR         | NR                                                                    | NR | NR | NR | NR | NR | NR |
| Xu, 2019[39]           | 100        | Stroke (100%)                                                         | NR | NR | NR | NR | NR | NR |
| Yu, 2020[12]           | mean =0.74 | The mean number of comorbidities at baseline was 2.24 (SD=1.38)       | NR | NR | NR | NR | NR | NR |
| Zijlstra, 2007[27]     | 32.6       | NR                                                                    | NR | NR | NR | NR | NR | NR |

For peer review only

## Appendix 4: Mental health outcomes related to falls, fear of falling, and social isolation (n=6)

| Author, Year    | Sample | Results                                                                                                                                                                                                                                                                                                                                                                             | Text description/ interpretation of findings                                                                                                                                                                                                                                                                                                                                                                                                                                                                                                                                                                                                                                                                                                                          |
|-----------------|--------|-------------------------------------------------------------------------------------------------------------------------------------------------------------------------------------------------------------------------------------------------------------------------------------------------------------------------------------------------------------------------------------|-----------------------------------------------------------------------------------------------------------------------------------------------------------------------------------------------------------------------------------------------------------------------------------------------------------------------------------------------------------------------------------------------------------------------------------------------------------------------------------------------------------------------------------------------------------------------------------------------------------------------------------------------------------------------------------------------------------------------------------------------------------------------|
| Murphy, 2002[1] | n=1064 | <p><b>Variables independently associated with activity restriction in participants with fear of falling</b></p> <p><i>Depression (CES-D scale)</i><br/>Adj relative risk: 1.27 (95% CI, 1.00-1.60); p=0.048</p>                                                                                                                                                                     | “We found that a history of an injurious fall within the past year, slow timed physical performance, two or more chronic conditions, and depressive symptoms were all independently associated with activity restriction.”                                                                                                                                                                                                                                                                                                                                                                                                                                                                                                                                            |
| Stel, 2004[2]   | n=204  | <p><b>Relationship between higher depression score and decline in social activities because of a fall</b></p> <p>OR: 2.0 (95% CI: 1.2-3.3); p&lt;0.05</p>                                                                                                                                                                                                                           | “A decline in functional status, social activities and physical activities was reported more often in respondents with a higher depression score.”                                                                                                                                                                                                                                                                                                                                                                                                                                                                                                                                                                                                                    |
| Gagnon, 2005[3] | n=105  | <p><b>Variables associated with fear of falling</b><br/>(Comparing subjects with no/slight fear and subjects with moderate/severe fear)</p> <p><b>Depression</b><br/>(Structured Clinical Interview for DSM-IV (SCID))</p> <p>Wald chi-square= 8.76; p=0.03</p> <p><b>Anxiety</b><br/>(Structured Clinical Interview for DSM-IV (SCID))</p> <p>Wald chi-square= 5.95; p&lt;0.02</p> | <p>“Not only were depressive disorders and depression severity independently associated with fear of falling, but depression had the strongest association with this fear among all the variables that we measured.</p> <p>Given that this was a cross-sectional study, a causal relationship between depression and fear of falling cannot be inferred. [...] It is possible, therefore, that in some individuals, fear of falling is an anxious manifestation of depression. However, depression could also be a consequence of activity restriction or social isolation resulting from a fear of falling”</p> <p>“Depressive disorders and anxiety disorders were significantly associated with categorical fear of falling, independently of these variables”</p> |
| Curcio, 2009[4] | n=1668 | <p><b>Variables associated with activity restriction related to fear of falling</b></p> <p><b>Depression</b><br/>OR: 1.76 (95% CI, 1.38-2.24)</p>                                                                                                                                                                                                                                   | “A second model was then constructed with the psychosocial associated factors and other clinical and functional covariates (see Table 4). After adjustment, functional and clinical factors remained independently associated with activity restriction related to fear of falling. Only depression and poor perceived health variables emerged as independent factors.”                                                                                                                                                                                                                                                                                                                                                                                              |
| Dias, 2011[5]   | n=113  | <p><b>Variables associated with activity restriction due to fear of falling</b><br/>(compared to no FOF or FOF alone)</p>                                                                                                                                                                                                                                                           | “The variables that best discriminated the groups were depression, exhaustion and participation in social activities, demonstrated in the diagram (Figure 1). For the grouping obtained through the Chi-square                                                                                                                                                                                                                                                                                                                                                                                                                                                                                                                                                        |

|                   |         |                                                                                                                                                                                                                                                                                               |                                                                                                                                                                                                                                                                                                                                                                                                                                                                                                                                                                                                                                                                                                                                                                                                                                                                                                                  |
|-------------------|---------|-----------------------------------------------------------------------------------------------------------------------------------------------------------------------------------------------------------------------------------------------------------------------------------------------|------------------------------------------------------------------------------------------------------------------------------------------------------------------------------------------------------------------------------------------------------------------------------------------------------------------------------------------------------------------------------------------------------------------------------------------------------------------------------------------------------------------------------------------------------------------------------------------------------------------------------------------------------------------------------------------------------------------------------------------------------------------------------------------------------------------------------------------------------------------------------------------------------------------|
|                   |         | <p><b>Depression</b><br/>Chi-square=15.2, p=0.004</p>                                                                                                                                                                                                                                         | <p>Automatic Interaction Detection (CHAID) method, it may be observed that the first distinctive characteristic was depression, evaluated using GDS. Those with positive symptoms for depression showed 90% chance of restricting activities due to fear of falling.</p> <p>Additionally, the presence of depressive symptoms seems to modulate the factors that are associated with activity restriction due to fear of falling. A greater risk for depression has been associated with inadequate evaluation of coping self-efficacy in stressful events of life. It is worth noting that the participants of the present study who restricted activities by FOF showed lower self-efficacy in relation to the other participants. Thus, it is possible that elders with depressive symptoms perceive themselves less capable of performing certain tasks and, because of that, restrict their activities.</p> |
| Nakaya, 2013[6]   | n=43487 | <p><b>Relationship between history of falling and psychological distress</b></p> <p><u>Sufficient social support</u><br/>OR, 1.6 (95% CI: 1.3-1.9)<br/>p&lt;0.01</p> <p><u>Lack of social support</u><br/>OR, 2.0 (95% CI: 1.4-2.8)<br/>p&lt;0.01</p>                                         | <p>“We also conducted stratified analyses regarding OR of psychological distress according to differences in social support status. Almost all subjects with a history of physical disease (including those with history of fall/fracture) were at increased risk of psychological distress, regardless of social support.”</p>                                                                                                                                                                                                                                                                                                                                                                                                                                                                                                                                                                                  |
| Merchant, 2020[7] | n=493   | <p><b>Variables associated with fear of falling alone</b></p> <p><b>Depression</b><br/>OR, 4.90 ( 95% CI, 1.06–22.67)<br/>p&lt;0.05</p> <p><b>Variables associated with fear of falling + fear-based activity restriction</b></p> <p><b>Depression</b><br/>OR, 5.17 ( 95% CI, 1.84–14.54)</p> | <p>“In our study, FOF and/or FAR were both significantly associated with <b>depression</b> in univariate and multivariate logistics regression model. Those with FOF + FAR were nine times more likely to be depressed than those with no FOF. [...] Strong links between depressive symptoms with FOF and/or FAR have been reported in various studies, and their association is believed to be bidirectional, where management of one condition would improve the other.”</p>                                                                                                                                                                                                                                                                                                                                                                                                                                  |

## Appendix 5: Findings from included cohort studies (n=6)

| Author, Year     | Sample                                                                                                                                                                                                      | Results                                                                                                                                                                                                                                                                                                                                                                                                                                                                                                                                                                                                                                                                                                                                                                               | Text description/ interpretation of findings                                                                                                                                                                                                                                                                                                                                                                                                                                                                                                                                                                                                                                                                                                                                                                                                                                 |
|------------------|-------------------------------------------------------------------------------------------------------------------------------------------------------------------------------------------------------------|---------------------------------------------------------------------------------------------------------------------------------------------------------------------------------------------------------------------------------------------------------------------------------------------------------------------------------------------------------------------------------------------------------------------------------------------------------------------------------------------------------------------------------------------------------------------------------------------------------------------------------------------------------------------------------------------------------------------------------------------------------------------------------------|------------------------------------------------------------------------------------------------------------------------------------------------------------------------------------------------------------------------------------------------------------------------------------------------------------------------------------------------------------------------------------------------------------------------------------------------------------------------------------------------------------------------------------------------------------------------------------------------------------------------------------------------------------------------------------------------------------------------------------------------------------------------------------------------------------------------------------------------------------------------------|
| Vellas, 1987[8]  | <p>n=178</p> <p>Studied two populations:</p> <p>1) Individuals living in a retirement home (Fall victims = 59; Non-fallers=59)</p> <p>2) Individuals living at home (Fall victims = 30; Non-fallers=30)</p> | <p><u>Retirement home (n=118)</u></p> <p>Among the fall victims there was a tendency towards restriction of activity: 3% walked less indoors, 5% went outside less, 4% had no leisure activity, 7% no longer visited their children and 11% no longer visited their friends. The lack of significance (P&gt;0.05) is linked both to the very low level of activity on day 1 of the aged population living in retirement homes and to our small sample.</p> <p><u>At home (n=60)</u></p> <p>On day 1, the fallers and control group had identical levels of activity. Reported a significant difference in the number of participants who maintained the same level of activity after 6 months, with this number being reduced in fall victims compared to non-fallers (p&lt;0.02)</p> | <p>“The interpersonal relationships of the fallers were very poor: 90% did not belong to any group, 54% never visited their children, 40% never visited anybody.”</p> <p>“A fall may lead to loss of autonomy. Factors arising as a result of falls have been identified by Isaacs and his co-workers. Our prospective study confirms these findings and demonstrates the restriction of activity following a fall without fracture.”</p> <p>“Falls in elderly persons give rise to a decrease in activity and social life. The fear of recurrence often leads to 'institutionalizing' the patient. But, it is difficult to show whether falls are an indication or the cause of the loss of autonomy.”</p>                                                                                                                                                                  |
| Tinetti, 1998[9] | <p>n=1103 at baseline, 770 at 3 years follow-up</p>                                                                                                                                                         | <p><b>Effect of having 2 or more non-injurious falls on social functioning</b> (Social Activity Scale):</p> <p>Regression coefficient = -0.538 (p&lt;0.05)</p>                                                                                                                                                                                                                                                                                                                                                                                                                                                                                                                                                                                                                        | <p>“While there did not appear to be an increased risk of decline in social functioning among participants experiencing a single noninjurious fall, repetitive fallers experienced a decline in social functioning in both short- and long-term follow-up analyses. The relationship between repetitive falling and decline in social functioning remained after adjusting for each category of covariates.</p> <p>Experiencing a serious fall injury, on the other hand, was only marginally associated with decline in social functioning over the 1-year follow-up, and not at all over the 3-year follow-up. Preferential loss to follow-up of persons experiencing decline in social functioning between the 1- and 3-year follow-up interviews might at least partially explain the lack of relationship between injurious falls and change in social activities.”</p> |

|                          |                                                                                                                                                |                                                                                                                                                                                                                                                                                                                                                                                                                                                                                                                                                                                                                                                                                                                                                                                                |                                                                                                                                                                                                                                                                                                                                                                                                                                                                                                                                                                                                                                                                                                                                                                                                                                                                                                                                                                                                                                                                                                                                                                                                                                                                                                                                                                                                              |
|--------------------------|------------------------------------------------------------------------------------------------------------------------------------------------|------------------------------------------------------------------------------------------------------------------------------------------------------------------------------------------------------------------------------------------------------------------------------------------------------------------------------------------------------------------------------------------------------------------------------------------------------------------------------------------------------------------------------------------------------------------------------------------------------------------------------------------------------------------------------------------------------------------------------------------------------------------------------------------------|--------------------------------------------------------------------------------------------------------------------------------------------------------------------------------------------------------------------------------------------------------------------------------------------------------------------------------------------------------------------------------------------------------------------------------------------------------------------------------------------------------------------------------------------------------------------------------------------------------------------------------------------------------------------------------------------------------------------------------------------------------------------------------------------------------------------------------------------------------------------------------------------------------------------------------------------------------------------------------------------------------------------------------------------------------------------------------------------------------------------------------------------------------------------------------------------------------------------------------------------------------------------------------------------------------------------------------------------------------------------------------------------------------------|
| Van der Meulen, 2014[10] | <p>n=260</p> <p>Low level of concern about falling (n=127)</p> <p>High level of concern about falling (n=129)</p> <p>Follow-up = 14 months</p> | <p><b>Social participation</b> (Frenchay Activities Index)</p> <p><u>Low level falling concern:</u><br/>Baseline mean, 39.9 (SD, 7.1)<br/>Follow-up mean, 38.8 (SD, 7.6)</p> <p><u>High level falling concern:</u><br/>Baseline mean, 36.8 (SD, 7)<br/>Follow-up mean, 35.7 (SD, 7.7)</p> <p><b>p-value = 0.006</b></p>                                                                                                                                                                                                                                                                                                                                                                                                                                                                        | <p>“High and low levels of fall-related concerns predicted significant differences in ADL dysfunction and social participation that were persistent over 14 months of follow-up. [...] Accompanying effect size estimations were medium (social participation) to large (ADL dysfunction).”</p>                                                                                                                                                                                                                                                                                                                                                                                                                                                                                                                                                                                                                                                                                                                                                                                                                                                                                                                                                                                                                                                                                                              |
| Pin, 2016[11]            | <p>n=16583</p> <p>Fallers (n=411)</p> <p>Non-fallers (n=14205)</p>                                                                             | <p><b>Effect of falls on social participation</b> (binary variable based on if they reported performing at least one activity from a prespecified list of activities)</p> <p>Model 2 adjusted by time, age, sociodemographic variables and health indicators:<br/>OR, 0.86 [95% CI, 0.76-0.89] (p&lt;0.001)</p> <p>Model 3 added adjustment for frailty:<br/>OR, 0.95 [95% CI, 0.89-1.02]<br/>The interaction between initial frailty status and falling was significant (Table 4, Model 7a).<br/>Contrast analyses revealed that the probability of social participation was less among frail people than among people who did not meet any of the frailty criteria in both fallers (<math>\chi^2</math> (1)=6.93; p&lt;0.01) and non-fallers (<math>\chi^2</math> (1)=41.21; p&lt;0.001)</p> | <p>“Falling significantly decreased the probability of social participation in each of these activities and of participation in at least one of them, but only before frailty was introduced into the models (Table 3, Models 2 and 3). Frailty is indeed a strong confounder in the relationship between falls and social participation. When it is taken in consideration in multivariate models, the size of the effect for falling decreased and was no longer significant.”</p> <p>“Then, we demonstrated the major role of frailty in the relationship between falling and social participation. The construction of the frailty phenotype (Fried et al., 2001; Santos-Eggimann et al., 2009) was based on its physical component. In this manner, frailty and falling were very close constructs. They shared similar risk factors, such as mobility disorders or bone density, and they had similar consequences in terms of disability or mortality. Moreover, we showed that they had similar consequences in terms of social participation. Thus, it may be difficult to distinguish between the two concepts and to identify a specific impact of falling (Nowak &amp; Hubbard, 2009). However, our analyses showed that the continuity in or disengagement from social activities was due to a long-term process that was amplified by health events, rather than by the falls themselves.”</p> |
| Yu, 2020[12]             | <p>n=4680</p>                                                                                                                                  | <p><b>Relationship between number of falls and loneliness over 3 time-points</b> (3 item UCLA Loneliness Scale)</p> <p>Regression coefficient = 0.008, SE = 0.04, p = 0.048;</p>                                                                                                                                                                                                                                                                                                                                                                                                                                                                                                                                                                                                               | <p>“Only the number of falls was significantly correlated with the loneliness score in the next time point, and more frequent loneliness at the previous wave predicts an increased number of falls in 4 years [...] The results suggest that a vicious circle relationship exists between loneliness and falls. [...] An increased number of falls also predicted more frequent loneliness in 4 years. These findings support evidence reported in cross-</p>                                                                                                                                                                                                                                                                                                                                                                                                                                                                                                                                                                                                                                                                                                                                                                                                                                                                                                                                               |

1  
2  
3  
4  
5  
6  
7  
8  
9  
10  
11  
12  
13  
14  
15  
16  
17  
18  
19  
20  
21  
22  
23  
24  
25  
26  
27  
28  
29  
30  
31  
32  
33  
34  
35  
36  
37  
38  
39  
40  
41  
42  
43  
44  
45  
46  
47

|                 |                                                                                                                                                                                                                        |                                                                                                                                                                                                                                                                                                                                                                                                                                          |                                                                                                                                                                                                                                                                                                                                                                                                                                                                                                                                                                                                                                                                                                                                                                                                                                                                                                                                                                                                                                                                                                                                                                                                                                                          |
|-----------------|------------------------------------------------------------------------------------------------------------------------------------------------------------------------------------------------------------------------|------------------------------------------------------------------------------------------------------------------------------------------------------------------------------------------------------------------------------------------------------------------------------------------------------------------------------------------------------------------------------------------------------------------------------------------|----------------------------------------------------------------------------------------------------------------------------------------------------------------------------------------------------------------------------------------------------------------------------------------------------------------------------------------------------------------------------------------------------------------------------------------------------------------------------------------------------------------------------------------------------------------------------------------------------------------------------------------------------------------------------------------------------------------------------------------------------------------------------------------------------------------------------------------------------------------------------------------------------------------------------------------------------------------------------------------------------------------------------------------------------------------------------------------------------------------------------------------------------------------------------------------------------------------------------------------------------------|
|                 |                                                                                                                                                                                                                        | Wave 1-2: $\beta=0.030$ ,<br>Wave 2-3: $\beta= 0.068$                                                                                                                                                                                                                                                                                                                                                                                    | sectional studies that the occurrence of falls was related to social exclusion. [...] Older adults who have fallen more frequently might choose to avoid risky activities such as going outside of the home and engaging in social activities. This could lead to a discrepancy in desired and actual social engagement, which in turn results in more frequent experience of loneliness.”                                                                                                                                                                                                                                                                                                                                                                                                                                                                                                                                                                                                                                                                                                                                                                                                                                                               |
| Hajek, 2020[13] | n=8836<br><br>In total, 669 individuals changed fear of falling (FOF) status from wave 5 to wave 6. More specifically, while the onset of FOF occurred in 431 individuals, the end of FOF occurred in 238 individuals. | <b>Relationship between fear of falling and loneliness</b> (Bude and Lantermann scale)<br><br><b>Onset of FOF</b><br>$\beta=0.02$ , SE=0.02, p=NR<br><b>End of FOF</b><br>$\beta= -0.06$ , SE=0.03, p<0.05<br><br><b>Relationship between fear of falling and social isolation</b> (De Jong Gierveld Loneliness Scale)<br><br><b>Onset of FOF</b><br>$\beta=0.06$ , SE=0.03, p<0.1<br><b>End of FOF</b><br>$\beta= 0.01$ , SE=0.04, p=NR | “The end of FOF was associated with reduced depressive symptoms ( $\beta = -1.08$ , $P < .05$ ), decreased loneliness scores ( $\beta = -0.06$ , $P < .05$ ), as well as decreased negative affect ( $\beta = -0.07$ , $P < .05$ ).<br>We assume that the end of FOF has the potential to mark a decisive turning point in life for individuals who scored high in these adverse conditions (severe depressive symptoms, high loneliness, or frequent negative emotions) when they had FOF.”<br><br>“The end of FOF was associated with decreases in negative psychosocial outcome measures (depressive symptoms, negative affect, and loneliness). However, and in contrast to the other negative psychosocial outcome measures, it is quite puzzling why the end of FOF was not associated with decreases in social isolation. A possible explanation may be that even a major life event, such as the end of FOF, does not have the power to reduce social isolation because feelings of isolation may remain largely stable over the years among middle-aged and older adults with FOF. Thus, individuals developing feelings of social isolation caused by FOF, several years ago, may have difficulties in overcoming these feelings of isolation” |

## Appendix 6: Cross-sectional studies reporting on falls and social isolation/loneliness (n=11)

| Author, Year        | Sample | Results                                                                                                                                                                                                                                                                                                                            | Text description/ interpretation of findings                                                                                                                                                                                                                                                                                                                                                                                                                                                                                                                                                                                                                                                                                                                                                                                                                                                                                                                                                                                                                                                                                                                                                                                                                                                                                          |
|---------------------|--------|------------------------------------------------------------------------------------------------------------------------------------------------------------------------------------------------------------------------------------------------------------------------------------------------------------------------------------|---------------------------------------------------------------------------------------------------------------------------------------------------------------------------------------------------------------------------------------------------------------------------------------------------------------------------------------------------------------------------------------------------------------------------------------------------------------------------------------------------------------------------------------------------------------------------------------------------------------------------------------------------------------------------------------------------------------------------------------------------------------------------------------------------------------------------------------------------------------------------------------------------------------------------------------------------------------------------------------------------------------------------------------------------------------------------------------------------------------------------------------------------------------------------------------------------------------------------------------------------------------------------------------------------------------------------------------|
| Finn, 2001[14]      | n=49   | <p><b>Social Resources</b><br/>(OARS Social Support Scale)</p> <p><u>Fallers (n=25)</u><br/>Mean: 2.4 (SD, 1)</p> <p><u>Non-Fallers (n=24)</u><br/>Mean: 2.0 (SD, 0.78)</p> <p>p = 0.59</p>                                                                                                                                        | <p>“The data from the present study supports the conclusion that the social resources of nursing home residents are the same, regardless of a history of falls that does not change their level of previous functioning. Most nursing home residents are already in a position where they have to rely on others to come to them for visits, outings, etc.. Unlike many community-based elderly individuals most nursing home residents do not have the means or capabilities to visit others who are not in their immediate environment. Therefore, regardless of fall-history the social resources available to nursing home residents is dependent on others.”</p>                                                                                                                                                                                                                                                                                                                                                                                                                                                                                                                                                                                                                                                                 |
| Stel, 2004[2]       | n=204  | <p><b>Relationship between falls inside and decline in social activities because of a fall</b></p> <p>OR: 2.6 (95% CI: 1.1-6.5); p&lt;0.05</p>                                                                                                                                                                                     | <p>“A decline in social activities after falling was significantly associated with falls inside. The current study shows that falls could also have consequences on the level of functioning in older people: respondents reported a decline in functional status (35.3%), a decline in social activities outside the house (16.7%) and physical activities (15.2%) as a direct consequence of the last fall.”</p>                                                                                                                                                                                                                                                                                                                                                                                                                                                                                                                                                                                                                                                                                                                                                                                                                                                                                                                    |
| Nicholson, 2005[15] | n=68   | <p><b>Relationship between injurious falls and social isolation</b><br/>(Lubben Social Network Scale)</p> <p><b>Social isolation</b><br/><math>\rho = -0.4</math>; p&lt;0.05</p> <p><b>Female</b><br/><math>\rho = -0.5</math>; p=0.01</p> <p><b>Family Sub Scale of Social Isolation</b><br/><math>\rho = -0.2</math>; p=0.12</p> | <p>“Results suggest that there is a strong positive relationship between injurious falls and social isolation. Results from this sample suggest that there is an association between lower scores of the LSNS and higher number of injurious falls, which means that increased injurious falls are related to increased social isolation. In the findings for this sample it appears that there may be some direct link between injurious falls and social isolation.</p> <p>Gender appeared to play a role when examining H4. Males as a group did not show a significant relationship between number of injurious falls and social isolation. The relationship for females as a group was positive and significant. This female sample showed a high Pearson’s correlation coefficient (see Table 4). This suggests that injurious falls may trigger some direct link to social isolation in females.”</p> <p>“When examining the family subscale of the LSNS, there was no correlation between injurious falls and social isolation (see Table 3). It is possible that as the participant continues to have injurious falls and becomes less likely to leave the house due to a fear of future injurious falls, he/she will eventually become socially isolated. This is not necessarily the case when families are involved.”</p> |



1  
2  
3  
4  
5  
6  
7  
8  
9  
10  
11  
12  
13  
14  
15  
16  
17  
18  
19  
20  
21  
22  
23  
24  
25  
26  
27  
28  
29  
30  
31  
32  
33  
34  
35  
36  
37  
38  
39  
40  
41  
42  
43  
44  
45  
46  
47

|                        |        |                                                                                                                                                                                                                                                                                                                                                                                     |                                                                                                                                                                                                                                                                                                                                                                                                                                                                                                                                                                                                                                                                                                                                                 |
|------------------------|--------|-------------------------------------------------------------------------------------------------------------------------------------------------------------------------------------------------------------------------------------------------------------------------------------------------------------------------------------------------------------------------------------|-------------------------------------------------------------------------------------------------------------------------------------------------------------------------------------------------------------------------------------------------------------------------------------------------------------------------------------------------------------------------------------------------------------------------------------------------------------------------------------------------------------------------------------------------------------------------------------------------------------------------------------------------------------------------------------------------------------------------------------------------|
|                        |        | <p><b>Friend Sub Scale of Social Isolation</b><br/> <math>\rho = -0.43</math>; <math>p &lt; 0.05</math></p>                                                                                                                                                                                                                                                                         | <p>“On the other hand, in the case of the friends subscale, there was a strong correlation between injurious falls and social isolation, such that a greater number of injurious falls was associated with a greater degree of social isolation. A possible explanation for this may be the opposite of the phenomenon with family and social isolation. The participant who has increasing injurious falls may become more likely to stay in the house thus losing contact with friends. Friends of the participants tend to be around the same age as the participant and are less likely to increase the amount of visits to the participant to make up for the lack of contact the participant suffers as a result of being homebound.”</p> |
| Iliffe, 2007[16]       | n=3139 | <p><b>Falls and social isolation</b><br/> (Lubben social network scale)<br/> <u>Socially isolated (n=368)</u><br/> 13.6% reported multiple falls in the past 12 months<br/> <u>Not socially isolated (n=2133)</u> 10.7% reported multiple falls in the past 12 months<br/> <math>p = 0.11</math></p>                                                                                | <p>Multivariate analysis taking into account all statistically significant associations shows a different pattern. The risk of social isolation appears to be associated with depressed mood and living alone, while male sex, memory impairment and perceived poor health may be weakly associated. For the other factors [multiple falls] listed in the second hypothesis, no significant associations in bivariate or multivariate analyses were found.</p>                                                                                                                                                                                                                                                                                  |
| Van Lankveld, 2011[17] | n=154  | <p><b>Relationship of falls with loneliness</b><br/> (De Jong Gierveld Loneliness scale)<br/> Correlation coefficient = 0.14<br/> <math>p = \text{not significant}</math></p>                                                                                                                                                                                                       | <p>“Health status indicators were unrelated to falls and cognitive functioning, and showed low to moderate relations with the remaining health hazards.”</p>                                                                                                                                                                                                                                                                                                                                                                                                                                                                                                                                                                                    |
| Schnittger, 2012[18]   | n=579  | <p><b>Association between history of falls and pathways of loneliness</b></p> <p><b>Emotional loneliness</b><br/> (de Jong-Gierveld Loneliness Scale)<br/> Correlation coefficient=0.134<br/> <math>p &lt; 0.003</math></p> <p><b>Social loneliness</b><br/> (de Jong-Gierveld Loneliness Scale)<br/> Correlation coefficient=0.09<br/> <math>p = \text{not significant}</math></p> | <p>“Interestingly, social support was the only outcome in which a biological variable, falls history, emerged in the final model; this may indicate the relative importance of health factors compared to psychosocial factors in the loneliness models”</p>                                                                                                                                                                                                                                                                                                                                                                                                                                                                                    |



|                  |                                                                                                                |                                                                                                                                                                                                                                                                                                                                 |                                                                                                                                                                                                                                                                                                                                                                                                                                                                                                                                                                                               |
|------------------|----------------------------------------------------------------------------------------------------------------|---------------------------------------------------------------------------------------------------------------------------------------------------------------------------------------------------------------------------------------------------------------------------------------------------------------------------------|-----------------------------------------------------------------------------------------------------------------------------------------------------------------------------------------------------------------------------------------------------------------------------------------------------------------------------------------------------------------------------------------------------------------------------------------------------------------------------------------------------------------------------------------------------------------------------------------------|
|                  |                                                                                                                | <p><b>Social support</b><br/>(Lubben Social Network Scale)<br/>Correlation coefficient= -0.247<br/>p&lt;0.003</p>                                                                                                                                                                                                               |                                                                                                                                                                                                                                                                                                                                                                                                                                                                                                                                                                                               |
| Quach, 2016[19]  | <p>n=8464</p> <p>No falls group (n=5249)<br/>One fall group (n=1352)<br/>At least two falls group (n=1863)</p> | <p><b>Social Relationship Index [mean (SD)]</b></p> <p>No falls: 3.34 (1.32)<br/>One fall: 3.24 (1.35)<br/>At least two falls: 3.08 (1.35)<br/>p&lt;0.0001</p> <p><i>Note: this is a cohort study, but the outcomes relevant to our review question are from a cross-sectional survey given to participants at baseline</i></p> | <p>“Respondents who fell had a higher prevalence of clinically significant depression symptoms, were more often not married, had fewer good friends living in their neighborhood, were less likely to attend religious services or to be a volunteer, and were less likely to have perceived support from friends or relatives, when needed. The average score of the social relationship index for fallers (3.08 or 3.24 for respondents with at least 2 falls or one fall respectively) tended to be lower than for respondents who did not fall (3.34 score of the index, p&lt;.0001)”</p> |
| Hajek, 2017[20]  | <p>n=7808</p>                                                                                                  | <p><b>Variables associated with history of falls</b></p> <p><b>Social exclusion</b><br/>(Bude and Lantermann scale)<br/><math>\beta = 0.08</math>; SE, -0.02; p&lt;0.001</p> <p><b>Loneliness</b><br/>(De Jong Gierveld Loneliness Scale)<br/><math>\beta = 0.08</math>; SE, -0.02; p&lt;0.001</p>                              | <p>Controlling for potential confounders, linear regression analysis showed that reporting a fall in the previous 12 months was associated with higher social exclusion scores (<math>\beta = .08</math>, p &lt; .001), and higher loneliness scores (<math>\beta = .08</math>, p &lt; .001). Contrarily, reporting a fall in the preceding 12 months was not associated with the number of important people in regular contact.</p>                                                                                                                                                          |
| Robins, 2018[21] | <p>n=245</p>                                                                                                   | <p><b>Relationship between falls and social isolation</b><br/>(Friendship Scale for social isolation)<br/>OR 1.03 (95% CI: 0.66-1.62);<br/>p=0.9</p>                                                                                                                                                                            | <p>No statistically significant association reported between experiencing a fall in the past 12 months and social isolation.</p>                                                                                                                                                                                                                                                                                                                                                                                                                                                              |
| Faria, 2020[22]  | <p>n=48</p>                                                                                                    | <p><b>Relationship between falls and loneliness</b><br/>(UCLA scale)<br/>p=0.384</p>                                                                                                                                                                                                                                            | <p>No statistically significant association reported between experiencing a fall in the past 6 months and loneliness</p>                                                                                                                                                                                                                                                                                                                                                                                                                                                                      |

1  
2  
3  
4  
5  
6  
7  
8  
9  
10  
11  
12  
13  
14  
15  
16  
17  
18  
19  
20  
21  
22  
23  
24  
25  
26  
27  
28  
29  
30  
31  
32  
33  
34  
35  
36  
37  
38  
39  
40  
41  
42  
43  
44  
45  
46  
47

|                           |       |                                                                                                                                                                                                                                             |                                                                                                                                                                                                                                                                                                                                                                                                                                                                                                                                                                                                                                                                                                                                                                                                           |
|---------------------------|-------|---------------------------------------------------------------------------------------------------------------------------------------------------------------------------------------------------------------------------------------------|-----------------------------------------------------------------------------------------------------------------------------------------------------------------------------------------------------------------------------------------------------------------------------------------------------------------------------------------------------------------------------------------------------------------------------------------------------------------------------------------------------------------------------------------------------------------------------------------------------------------------------------------------------------------------------------------------------------------------------------------------------------------------------------------------------------|
| Vanden Wyngaert, 2020[23] | n=113 | <p><b>Variables associated with risk of falls</b></p> <p><b>Ability to participate in social roles and activities</b><br/>(PROMIS questionnaire)<br/>R<sup>2</sup>=0.11; p=0.01</p> <p><b>Depression</b><br/>R<sup>2</sup>=0.08; p=0.01</p> | <p>“Regarding the PROMIS questionnaire, low associations were found between measures of the risk of falls and the appreciation of participation in social roles and activities on the one hand (R2 = 0.11), and depression on the other (R2 = 0.08)”</p> <p>“Remarkably, the risk of falls on itself was identified as a determinant of difficulties on psycho-social well-being (i.e. depression and social isolation) and of objective health utility [...]</p> <p>As such, falls and an increased risk of falls can deter subjects to continue their outdoor social activities, resulting in changes in means and location of social contact to less stimulating activities (e.g. a phone call rather than a rendezvous point), promoting the risk of impairments in mental health and depression”</p> |
|---------------------------|-------|---------------------------------------------------------------------------------------------------------------------------------------------------------------------------------------------------------------------------------------------|-----------------------------------------------------------------------------------------------------------------------------------------------------------------------------------------------------------------------------------------------------------------------------------------------------------------------------------------------------------------------------------------------------------------------------------------------------------------------------------------------------------------------------------------------------------------------------------------------------------------------------------------------------------------------------------------------------------------------------------------------------------------------------------------------------------|

For peer review only

## Appendix 7: Cross-sectional studies reporting on fear of falling and activity restriction due to fear of falling (n= 15)

| Author, Year      | Sample | Results                                                                                                                                                                                                                                                                                                                                                                                                                                                                                                                             | Text description/ interpretation of findings                                                                                                                                                                                                                                                                                                                                                                                                                                                                                                                                                                                                                                                                                                                                                                                                                                                                                                                                                                                                                                                                                                          |
|-------------------|--------|-------------------------------------------------------------------------------------------------------------------------------------------------------------------------------------------------------------------------------------------------------------------------------------------------------------------------------------------------------------------------------------------------------------------------------------------------------------------------------------------------------------------------------------|-------------------------------------------------------------------------------------------------------------------------------------------------------------------------------------------------------------------------------------------------------------------------------------------------------------------------------------------------------------------------------------------------------------------------------------------------------------------------------------------------------------------------------------------------------------------------------------------------------------------------------------------------------------------------------------------------------------------------------------------------------------------------------------------------------------------------------------------------------------------------------------------------------------------------------------------------------------------------------------------------------------------------------------------------------------------------------------------------------------------------------------------------------|
| Tinetti, 1994[24] | n=1103 | <p><b>Fear of falling</b><br/>(Falls Efficacy Scale – modified so low score corresponds with low confidence or greater fear)</p> <p><u>Fallers</u><br/>Mean, 79.8 (SD 23.4)</p> <p><u>Non-fallers</u><br/>Mean, 88.1 (SD 17.9)</p> <p>p &lt; .0001</p> <p><b>Activity restriction because of fear of falling</b><br/>Fallers = 24%<br/>Non-fallers =15%<br/>chi-square= 13.1; p &lt; 0.001</p>                                                                                                                                      | <p>In order to examine the impact of recent falls, we also determined the proportion of subjects reporting fear and the mean fall-related efficacy scores separately for subjects who did and did not experience a fall in the year prior to the interview. The proportion of subjects reporting a decrease in activity because of fear of falling was 24% among fallers vs 15% among non-fallers (chi-square= 13.1; p &lt; .001). The mean fall-related efficacy scores were 79.8 (SD 23.4) and 88.1 (SD 17.9) among fallers and non-fallers, respectively (p &lt; .0001).</p>                                                                                                                                                                                                                                                                                                                                                                                                                                                                                                                                                                       |
| Howland, 1998[25] | n=266  | <p><b>Relationship between falls and fear of falling</b><br/>OR: 2.498 (95% CI: 1.013-6.159); p=0.05</p> <p><b>Relationship between falls and activity curtailment among those afraid of falling</b><br/>OR: 1.094 (95% CI: 0.376-3.177); p=0.869</p> <p><b>Relationship between social support and activity curtailment among those afraid of falling</b><br/>(Social Support Scale)<br/>OR: 1.574 (95% CI: 1.082-2.290); p=0.018<br/><i>Note: Here a higher social support score indicates lower levels of social support</i></p> | <p>“The contribution of personal falls experience to fear of falling was apparent. Those who suffered a previous fall were more likely to have a fear of falling.”</p> <p>“Surprisingly, neither the degree of fear of falling nor the experience of falls was associated with activity restriction. This finding suggests that activity curtailment is not just associated with extreme levels of fear. The presence of social support was, however, important. Those who could rely on others or talk with friends about falling were least likely to report activity curtailment. Thus, support of family and friends may be an important prerequisite for continuing to remain active even in the face of fear of falling. This support may serve as a buffer to the potentially debilitating consequences of fear of falling. It is possible this support is manifested as encouragement for remaining active.”</p> <p>“Those who curtailed activities [...] did not differ with respect to social integration but were significantly (p = .024) less likely to be able to rely on friends or relatives in times of crisis (social support)”</p> |
| Murphy, 2002[1]   | n=1064 | <p><b>Variables independently associated with activity restriction in participants with fear of falling</b></p>                                                                                                                                                                                                                                                                                                                                                                                                                     | <p>“We found that a history of an injurious fall within the past year, slow timed physical performance, two or more chronic conditions, and</p>                                                                                                                                                                                                                                                                                                                                                                                                                                                                                                                                                                                                                                                                                                                                                                                                                                                                                                                                                                                                       |

|                       |        |                                                                                                                                                                                                                                                                                                                                          |                                                                                                                                                                                                                                                                                                                                                                                                                                                                                                                                                                            |
|-----------------------|--------|------------------------------------------------------------------------------------------------------------------------------------------------------------------------------------------------------------------------------------------------------------------------------------------------------------------------------------------|----------------------------------------------------------------------------------------------------------------------------------------------------------------------------------------------------------------------------------------------------------------------------------------------------------------------------------------------------------------------------------------------------------------------------------------------------------------------------------------------------------------------------------------------------------------------------|
|                       |        | <p><i>Injurious fall</i><br/>Adjusted relative risk (ARR): 1.36 (95% CI, 1.11-1.66); p=0.003</p> <p><i>Two or more chronic conditions</i><br/>ARR: 1.34 (95% CI, 1.08-1.65); p=0.007</p> <p><i>Slow-timed physical performance</i><br/>ARR: 1.44 (95% CI, 1.18-1.75); p=0.0004</p>                                                       | <p>depressive symptoms were all independently associated with activity restriction.”</p>                                                                                                                                                                                                                                                                                                                                                                                                                                                                                   |
| Apikomonkon, 2003[26] | n=546  | <p><b>Relationship between falls and activity restriction</b><br/>Chi-square=5.49, p&lt;0.05</p> <p><b>Relationship between fear of falling and activity restriction</b><br/>Chi-square=23.27, p&lt;0.001</p>                                                                                                                            | <p>“Compared with non-fallers, the older persons with falls experiences were more likely to have activity restriction (25% vs 16%). The Chi-square test indicated that fall history was associated with activity restriction measured by dichotomous question.”</p> <p>“Older people with FOF were more likely to have activity restriction (26% vs 10%). The FOF using the SAFE Thai version was significantly associated with activity restriction as measured by dichotomous question.”</p>                                                                             |
| Gagnon, 2005[3]       | n=105  | <p><b>Variables associated with fear of falling</b><br/>(Comparing subjects with no/slight fear and subjects with moderate/severe fear)</p> <p><b>Social support</b><br/>(confiding-relationships component of the Bedford Life Events and Difficulties Schedule modified for elderly subjects)</p> <p>Wald chi-square= 3.77; p=0.05</p> | <p>“The following secondary independent variables were significantly associated with categorical fear of falling: dizziness (Wald chi-square 6.58; p 0.01), total number of medications (Wald chi-square 5.40; p 0.02), and social support (Wald chi-square 3.77; p 0.05). (Note: Higher scores mean less support.)”</p>                                                                                                                                                                                                                                                   |
| Zijlstra, 2007[27]    | n=4376 | <p><b>Variables significantly associated with avoidance of activity due to fear of falling</b></p> <p><b>Multiple falls in past 6 months</b><br/>OR: 1.97 (95% CI, 1.52-2.54)</p>                                                                                                                                                        | <p>“When fear of falling was added as an additional variable (model 3; Table 3), odds ratios of all variables that showed significance in model 2 decreased. Nevertheless, the association for the highest age group (≥80 years), fair and poor perceived general health and multiple falls with avoidance of activities remained statistically significant. Our findings regarding avoidance of activity remained fairly similar when fear of falling was entered into the logistic model. Although sometimes, often and very often experiencing fear of falling were</p> |

|                  |        |                                                                                                                                                                                                                                                                                                                                                                                                                                                                                                           |                                                                                                                                                                                                                                                                                                                                                                                                                                                                                                                                                                                                                                                                                                                                                                                                                                                                                                                                                                                                                                                                                                                                                                                                                                                                                                |
|------------------|--------|-----------------------------------------------------------------------------------------------------------------------------------------------------------------------------------------------------------------------------------------------------------------------------------------------------------------------------------------------------------------------------------------------------------------------------------------------------------------------------------------------------------|------------------------------------------------------------------------------------------------------------------------------------------------------------------------------------------------------------------------------------------------------------------------------------------------------------------------------------------------------------------------------------------------------------------------------------------------------------------------------------------------------------------------------------------------------------------------------------------------------------------------------------------------------------------------------------------------------------------------------------------------------------------------------------------------------------------------------------------------------------------------------------------------------------------------------------------------------------------------------------------------------------------------------------------------------------------------------------------------------------------------------------------------------------------------------------------------------------------------------------------------------------------------------------------------|
|                  |        | <p><b>Aged 80 years or older</b><br/>OR: 1.56 (95% CI, 1.24-1.95)</p> <p><b>Fair perceived general health</b><br/>OR: 2.92 (95% CI, 2.43-3.52)</p> <p><b>Poor perceived general health</b><br/>OR: 5.7 (95% CI, 3.57-9.12)</p>                                                                                                                                                                                                                                                                            | <p>strongly associated with avoidance of activity, higher age (<math>\geq 80</math> years), fair and poor perceived health and multiple falls remained independently associated with avoidance of activity in community-living older people. This implies that interventions aimed at reducing avoidance of activity should not focus on fear of falling alone, but on other modifiable factors, like falls, as well”</p>                                                                                                                                                                                                                                                                                                                                                                                                                                                                                                                                                                                                                                                                                                                                                                                                                                                                      |
| Iliffe, 2007[16] | n=3139 | <p><b>Relationship between fear of falling and social isolation</b><br/>(Lubben Social Network Scale)</p> <p>OR: 1.21 (95% CI, 0.88-1.65)</p>                                                                                                                                                                                                                                                                                                                                                             | <p>Multivariate analysis taking into account all statistically significant associations shows a different pattern. The risk of social isolation appears to be associated with depressed mood and living alone, while male sex, memory impairment and perceived poor health may be weakly associated. For the other factors [(fear of falling)] listed in the second hypothesis, no significant associations in bivariate or multivariate analyses were found.</p>                                                                                                                                                                                                                                                                                                                                                                                                                                                                                                                                                                                                                                                                                                                                                                                                                              |
| Curcio, 2009[4]  | n=1668 | <p><b>Variables associated with activity restriction related to fear of falling</b></p> <p><b>At least 1 fall in past year</b><br/>OR: 1.48 (95% CI, 1.18-1.86); p=0.001</p> <p><b>Low social participation</b><br/>OR: 1.52 (95% CI, 1.20-1.92); p&lt;0.01</p> <p><b>Poor perceived health</b><br/>OR: 1.38 (95% CI, 1.06-1.79)</p> <p><b>Difficulties in activities of daily living</b><br/>OR: 1.65 (95% CI, 1.16-2.32)</p> <p><b>Decreased physical activity</b><br/>OR: 1.35 (95% CI, 1.06-1.70)</p> | <p>“Those who had activity restriction related to fear of falling were significantly more likely to have had a fall within the past year, with a trend to suffer recurrent falls and injurious falls”</p> <p>“Table 3 shows the bivariate relationships between activity restriction related to fear of falling and psychosocial factors. Activity restriction related to fear of falling had a strong bivariate association with poor perceived health, depression, low social participation, and poor life satisfaction.”</p> <p>“A second model was then constructed with the psychosocial associated factors and other clinical and functional covariates (see Table 4). After adjustment, functional and clinical factors remained independently associated with activity restriction related to fear of falling. Only depression and poor perceived health variables emerged as independent factors.”</p> <p>“logistic regression analyses for activity restriction related to fear of falling. In the first model, 19 demographic, functional, and health-related variables with p values less than .05 derived from the bivariate analysis were entered into the logistic regression as independent variables. Difficulties in ADL, decreased physical activity, polypharmacy, and</p> |

|                |       |                                                                                                                                                                                                                                                                                                                                                                                                                                                        |                                                                                                                                                                                                                                                                                                                                                                                                                                                                                                                                                                                                                                                                                                                                                                                                                                                                                                                                                                                                                                                                                                                                                                                                                                                                                                                                                                                                                                                                                                                                                                                                                                                                                                                                                                                                                                                           |
|----------------|-------|--------------------------------------------------------------------------------------------------------------------------------------------------------------------------------------------------------------------------------------------------------------------------------------------------------------------------------------------------------------------------------------------------------------------------------------------------------|-----------------------------------------------------------------------------------------------------------------------------------------------------------------------------------------------------------------------------------------------------------------------------------------------------------------------------------------------------------------------------------------------------------------------------------------------------------------------------------------------------------------------------------------------------------------------------------------------------------------------------------------------------------------------------------------------------------------------------------------------------------------------------------------------------------------------------------------------------------------------------------------------------------------------------------------------------------------------------------------------------------------------------------------------------------------------------------------------------------------------------------------------------------------------------------------------------------------------------------------------------------------------------------------------------------------------------------------------------------------------------------------------------------------------------------------------------------------------------------------------------------------------------------------------------------------------------------------------------------------------------------------------------------------------------------------------------------------------------------------------------------------------------------------------------------------------------------------------------------|
|                |       | <p><b>Polypharmacy</b><br/>OR: 1.56 (95% CI, 1.14-2.14)</p> <p><b>Below poverty level</b><br/>OR: 1.32 (95% CI, 1.05-1.65)</p>                                                                                                                                                                                                                                                                                                                         | <p>extreme poverty were independently associated with activity restriction related to fear of falling. A second model was then constructed with the psychosocial associated factors and other clinical and functional covariates (see Table 4). After adjustment, functional and clinical factors remained independently associated with activity restriction related to fear of falling.”</p>                                                                                                                                                                                                                                                                                                                                                                                                                                                                                                                                                                                                                                                                                                                                                                                                                                                                                                                                                                                                                                                                                                                                                                                                                                                                                                                                                                                                                                                            |
| Kara, 2009[28] | n=47  | <p><b>Relationship between fear of falling and loneliness</b><br/>(Philadelphia Geriatric Center Morale Scale)<br/><math>\rho = 0.258</math>; <math>p = \text{Not significant}</math></p>                                                                                                                                                                                                                                                              | <p>When the correlation between the fear of falling and the subscales of the Philadelphia Geriatric Center Morale Scale is examined, no correlations were found (Table 5).</p>                                                                                                                                                                                                                                                                                                                                                                                                                                                                                                                                                                                                                                                                                                                                                                                                                                                                                                                                                                                                                                                                                                                                                                                                                                                                                                                                                                                                                                                                                                                                                                                                                                                                            |
| Dias, 2011[5]  | n=113 | <p><b>Variables associated with activity restriction due to fear of falling</b><br/>(compared to no FOF or FOF alone)</p> <p><b>Fear of falling intensity</b><br/>Mean 3.4 (SD, 0.9); <math>p &lt; 0.0</math></p> <p><b>Depression</b><br/>Chi-square=15.2, <math>p = 0.004</math></p> <p><b>Exhaustion</b><br/>Chi-square=9.2, <math>p = 0.01</math></p> <p><b>Participation in social activities</b><br/>Chi-square=10.4, <math>p = 0.016</math></p> | <p>“The three groups were statistically different in relation to FOF evaluated using the question about fear intensity. The group that reported FOF and activity restriction demonstrated higher levels of fear when compared with the other groups”</p> <p>“The variables that best discriminated the groups were depression, exhaustion and participation in social activities, demonstrated in the diagram (Figure 1). For the grouping obtained through the Chi-square Automatic Interaction Detection (CHAID) method, it may be observed that the first distinctive characteristic was depression, evaluated using GDS. Those with positive symptoms for depression showed 90% chance of restricting activities due to fear of falling. Additionally, the presence of depressive symptoms seems to modulate the factors that are associated with activity restriction due to fear of falling. A greater risk for depression has been associated with inadequate evaluation of coping self-efficacy in stressful events of life. It is worth noting that the participants of the present study who restricted activities by FOF showed lower self-efficacy in relation to the other participants. Thus, it is possible that elders with depressive symptoms perceive themselves less capable of performing certain tasks and, because of that, restrict their activities.</p> <p>Out of the elders that did not have depressive symptoms, those who had positive result for exhaustion of the frailty phenotype had 78% chance of restricting activities due to fear of falling.”</p> <p>“Out of the ones who did not show positive result for exhaustion, the other distinctive characteristic was participation in social activities. Those who stopped performing activities had 73% chance of restricting activities due to fear of falling.”</p> |

|                           |        |                                                                                                                                                                                                                                                |                                                                                                                                                                                                                                                                                                                                                      |
|---------------------------|--------|------------------------------------------------------------------------------------------------------------------------------------------------------------------------------------------------------------------------------------------------|------------------------------------------------------------------------------------------------------------------------------------------------------------------------------------------------------------------------------------------------------------------------------------------------------------------------------------------------------|
|                           |        |                                                                                                                                                                                                                                                | Participation in social activities was the last discriminatory factor for the studied sample; however this variable did not show association with activity restriction in the bivariate analysis. It is possible that this difference in relation to the participation in social activities only occurs for a subgroup and not for the whole sample” |
| Mendes da Costa, 2012[29] | n=501  | <p><b>Relationship between activity restriction due to fear of falling and number of falls in past 12 months</b></p> <p>2 or more falls<br/>OR, 3.04 (95% CI, 1.70-5.42)</p> <p>1 fall<br/>OR, 1.33 (95% CI, 0.66-2.68)</p>                    | “activity restriction was increased significantly with age and with the number of falls within the past 12 months, affecting however one quarter of the subjects who did not fall. In the logistic regression model, these associations remained significant”                                                                                        |
| Choi, 2015[30]            | n=4247 | <p><b>Relationship between falls and fear-induced activity restriction</b></p> <p><u>Previous fall experiences</u><br/>OR, 2.12 [95% CI, 0.96-4.67]<br/>p=0.062</p> <p><u>Injurious falls</u><br/>OR, 3.03 [95% CI, 1.21-7.54]<br/>p=0.008</p> | Characteristics independently associated with fear-induced activity restriction were low socioeconomic status, cognitive impairment, difficulty with activities of daily living, and a history of injurious falls.                                                                                                                                   |
| Ferreira, 2018[31]        | n=7935 | <p><b>Relationship between fear of falling because of sidewalk defects and social participation</b></p> <p>OR 1.01 (95% CI: 0.99-1.04)</p>                                                                                                     | “As in the univariate analysis, the fear of falling because of defects in sidewalks and the perception of violence in the neighborhood were not associated with social participation.”                                                                                                                                                               |
| Petrinec, 2020[32]        | n=108  | <p><b>Relationship between fear of falling and social functioning</b></p> <p>(Medical Outcomes Study 36-item Short-Form General Health Survey)</p> <p><math>\beta = -0.29</math></p>                                                           | “Fear of falls was an independent predictor for role physical, physical functioning, and social functioning.”                                                                                                                                                                                                                                        |
| Merchant, 2020[7]         | n=493  | <p><b>Variables associated with fear of falling alone</b></p> <p><b>Number of falls</b></p>                                                                                                                                                    | “The multivariate logistics regression in Table 2 shows that female sex (OR = 3.54; 95% CI = 1.82–6.90), number of medications (OR = 1.28; 95% CI = 1.03–13.60), prefrail or frail (OR = 2.17; 95% CI = 1.26–3.73), depression (OR = 4.90; 95% CI = 1.06–22.67), and number of falls in the                                                          |

1  
2  
3  
4  
5  
6  
7  
8  
9  
10  
11  
12  
13  
14  
15  
16  
17  
18  
19  
20  
21  
22  
23  
24  
25  
26  
27  
28  
29  
30  
31  
32  
33  
34  
35  
36  
37  
38  
39  
40  
41  
42  
43  
44  
45  
46  
47

|  |  |                                                                                                                                                                                                                                                                                                                                                                                                                                                                           |                                                                                                                                                                                                                                                                                                                                                                                                                                                                                                                                                                                                                                                                                                                                                                                                                                                                                               |
|--|--|---------------------------------------------------------------------------------------------------------------------------------------------------------------------------------------------------------------------------------------------------------------------------------------------------------------------------------------------------------------------------------------------------------------------------------------------------------------------------|-----------------------------------------------------------------------------------------------------------------------------------------------------------------------------------------------------------------------------------------------------------------------------------------------------------------------------------------------------------------------------------------------------------------------------------------------------------------------------------------------------------------------------------------------------------------------------------------------------------------------------------------------------------------------------------------------------------------------------------------------------------------------------------------------------------------------------------------------------------------------------------------------|
|  |  | <p>OR, 2.13 ( 95% CI, 1.20–3.78)<br/>p&lt;0.05</p> <p><b>Social isolation</b><br/>OR, 0.99 ( 95% CI, 0.51–1.89)<br/>p=not significant</p> <p><b>Variables associated with fear of falling + fear-based activity restriction</b></p> <p><b>Number of falls</b><br/>OR, 1.4 ( 95% CI, 0.94–2.20)<br/>p=not significant</p> <p><b>Social isolation</b><br/>OR, 1.7 ( 95% CI, 0.82–3.55)<br/>p=not significant</p> <p><b>Sarcopenia</b><br/>OR, 8.13 (95% CI, 1.52–43.41)</p> | <p>past 12 months (OR = 2.13; 95% CI = 1.20–3.78) were significantly associated with FOF. Only sarcopenia (OR = 8.13; 95% CI = 1.52–43.41) and depression (OR = 5.17; 95% CI = 1.84–14.54) were significantly associated with FOF + FAR.”</p> <p>“<b>History of falling</b> is a well-known risk factor for FOF and/or FAR as persons who have experienced falls are more likely to develop fear. However, three-quarters of those with FOF and two-thirds of those with FOF + FAR had never experienced a fall in our study”</p> <p>“<b>Social isolation</b> is another factor that is poorly studied. In our study, one in three older adults with FOF + FAR were at risk of social isolation compared with one in five with no FOF”</p> <p>“Prefrailty, frailty, and <b>sarcopenia</b> have significant association with FOF and/or FAR in both univariate and multivariate analysis.”</p> |
|--|--|---------------------------------------------------------------------------------------------------------------------------------------------------------------------------------------------------------------------------------------------------------------------------------------------------------------------------------------------------------------------------------------------------------------------------------------------------------------------------|-----------------------------------------------------------------------------------------------------------------------------------------------------------------------------------------------------------------------------------------------------------------------------------------------------------------------------------------------------------------------------------------------------------------------------------------------------------------------------------------------------------------------------------------------------------------------------------------------------------------------------------------------------------------------------------------------------------------------------------------------------------------------------------------------------------------------------------------------------------------------------------------------|



## Appendix 8: Relevant findings from qualitative studies (n=7)

| Author, Year           | Qualitative analysis approach, and sample size | Results                                                                                                                                                                                                                                                                                                                                                                                                                                                                                                                                                                                                                                                                                                                                                                                                                                                                                                                                                                                                                                                                                                                                                                                                                                                                                                                                                                                                                                                                                                                                                                                                                                                                                                                                                                                                                                                                                                                                                                                                                                                                                                                                                                                                                                                               |
|------------------------|------------------------------------------------|-----------------------------------------------------------------------------------------------------------------------------------------------------------------------------------------------------------------------------------------------------------------------------------------------------------------------------------------------------------------------------------------------------------------------------------------------------------------------------------------------------------------------------------------------------------------------------------------------------------------------------------------------------------------------------------------------------------------------------------------------------------------------------------------------------------------------------------------------------------------------------------------------------------------------------------------------------------------------------------------------------------------------------------------------------------------------------------------------------------------------------------------------------------------------------------------------------------------------------------------------------------------------------------------------------------------------------------------------------------------------------------------------------------------------------------------------------------------------------------------------------------------------------------------------------------------------------------------------------------------------------------------------------------------------------------------------------------------------------------------------------------------------------------------------------------------------------------------------------------------------------------------------------------------------------------------------------------------------------------------------------------------------------------------------------------------------------------------------------------------------------------------------------------------------------------------------------------------------------------------------------------------------|
| Ward-Griffin, 2004[33] | Phenomenological approach<br><br>n=9           | <b><i>“Restricting activities was a second strategy identified by the participants, which involved avoiding certain social activities or/and physical environments. Participants used this strategy when they wanted to “play it safe” in times of inclement weather or in situations where ambulation might be difficult.</i></b> Precarious weather conditions seemed to heighten their awareness and fear of falling. As Sarah explained, “I do not fear falling, except around steps. They terrify me to death [along with] scaffolding around the town—that bothers me. Little kids on bicycles on the sidewalk— that bothers me. And I am restricted to the house when there’s fresh snow on the ground.” Similarly Wilfred stated, “When it’s really, really icy, and I don’t have to go out, I don’t drive the car. I don’t go out either.””                                                                                                                                                                                                                                                                                                                                                                                                                                                                                                                                                                                                                                                                                                                                                                                                                                                                                                                                                                                                                                                                                                                                                                                                                                                                                                                                                                                                                  |
| Meric, 2007[34]        | Analysis approach not reported<br><br>n=22     | <b><i>“After having a falling experience, elderly individuals had behavioral changes, which decreased the competency of achieving daily life activities, such as staying away from the crowded environments, not going outside alone, acting very slowly, not able to do daily activities alone:</i></b><br>“... I can't go out anymore. I haven't been out alone for 2 years, there are always people next to me.” (75; woman).<br>“... I take my man's arm on the street, I can't get out much in case I fall into the street” (77; woman).””                                                                                                                                                                                                                                                                                                                                                                                                                                                                                                                                                                                                                                                                                                                                                                                                                                                                                                                                                                                                                                                                                                                                                                                                                                                                                                                                                                                                                                                                                                                                                                                                                                                                                                                       |
| Schmid, 2009[35]       | Latent content analysis<br><br>n=42            | <b><i>“Quotes regarding the subsequent consequences of poststroke falls categorized into the following three themes: (1) limiting activity and participation, (2) increasing dependence, and (3) developing a fear of falling”</i></b><br><br><b><i>“Limiting activity: Because falling became common for some participants, talk about strategies for the prevention of future falls was common and emerged naturally during interviews. A significant consequence was the choice to limit everyday life activities at home and in the community to help manage and prevent falls”</i></b><br><br><b><i>“Increasing dependence: Participants discussed their dependence on assistive devices such as walkers, canes, and wheelchairs to reduce falls and feel secure in their environment. Some participants indicated use of the furniture, walls, or people as alternative assistive devices. Many discussed dependence on caregivers for maintaining balance and preventing falls. Participants easily became isolated because they were fearful to leave their home, and some were even fearful to move about their own home, becoming increasingly dependent.”</i></b><br><br><b><i>“Developing fear of falling: This initial experience of falling with stroke onset was a traumatic event that consequently resulted in participants expressing fear that future falls would mean having another stroke. They also discussed the subsequent development of fear of falling and the fear of being left on the floor for hours at a time. Participants described genuine fear of falling and fear about being hurt as well as the subsequent impact on function and independence. Some participants discussed falls becoming a frequent event and a common and pervasive concern; fear, worry, and concern became a daily consequence of poststroke falls. Some participants were fearful that they would fall while out in the community and addressed the embarrassment of a public fall. They were concerned about how they looked while walking around and seemed to be worried about the stigma related to falls and decreased mobility. Managing falls and fear of falling in everyday life became an important aspect of poststroke adjustment.”</i></b> |

|                       |                                                     |                                                                                                                                                                                                                                                                                                                                                                                                                                                                                                                                                                                                                                                                                                                                                                                                                                                                                                                                                                                                                                                                                                                                                                                                                                 |
|-----------------------|-----------------------------------------------------|---------------------------------------------------------------------------------------------------------------------------------------------------------------------------------------------------------------------------------------------------------------------------------------------------------------------------------------------------------------------------------------------------------------------------------------------------------------------------------------------------------------------------------------------------------------------------------------------------------------------------------------------------------------------------------------------------------------------------------------------------------------------------------------------------------------------------------------------------------------------------------------------------------------------------------------------------------------------------------------------------------------------------------------------------------------------------------------------------------------------------------------------------------------------------------------------------------------------------------|
| <p>Faes, 2010[36]</p> | <p>Grounded theory approach<br/><br/>n=10</p>       | <p><b><i>“Patients described social withdrawal and attributed this to their fear of falling and the loss of physical capabilities after falling. Patients recognised that they became (more) dependent on their caregiver after falling. One patient experienced social benefits from her fall, since she now receives more attention from her children”</i></b></p> <p>“P#1 I can’t travel anymore because of my limited mobility. I injured my leg in a fall.<br/>P#4 I stay at home more often and don’t visit my friends anymore. I am afraid to fall when I go out.<br/>P#5 My grandson is almost one year old. I still haven’t seen his room. His room is upstairs; I am too anxious to fall when climbing the stairs.”</p> <p><b><i>“Furthermore, our findings confirmed the consequences of falls in cognitively unimpaired older persons that are mentioned in the literature; these include a fear of falling and social withdrawal due to the fear of falling and physical limitations”</i></b></p>                                                                                                                                                                                                                  |
| <p>Chiu, 2011[37]</p> | <p>Focussed ethnographic approach<br/><br/>n=18</p> | <p>“Following their initial fall, it appeared that changes occurred in individuals’ independent living and use of informal support networks. While activities of daily living are continued either independently, or with help from —hourly maids during the rehabilitation period or for longer, <b><i>recreational activities usually were a second priority and were soon discontinued.</i></b> Mah-Jong, one of the most popular tile games among Chinese was mentioned by 12 respondents as a favourite pass time. Other social activities mentioned included Cantonese opera, volunteering within their communities, and dim sum with friends. <b><i>After a fall, these activities were interrupted for two main reasons: 1) lack of transportation means and 2) lower mobility capabilities. Feelings of loneliness arose as the respondents felt that they were cut off from their friends.”</i></b></p> <p>“Intuitive changes included modifications made to personal behaviours. <b><i>Avoidance behaviour was reported as an intuitive change. Specifically, fallers would avoid outdoor activities.</i></b> Other intuitive changes include being more careful ("taking care") when walking and slowing down.”</p> |
| <p>Host, 2011[38]</p> | <p>Phenomenographic approach<br/><br/>n=14</p>      | <p>“Others <b><i>stopped doing certain activities to avoid falling and they did not choose activities that made them scared and nervous and caused bodily pain. They thus perceived that physical activity was not good and therefore stopped the activity.</i></b> The families and the general practitioner (GP) supported their choices. Conversely, some felt that it was a loss if they had to stop activities they had enjoyed because it increased their risk of falling.”</p> <p><b><i>“Fall accidents had implications for older people’s identity and autonomy, and they could lead to social isolation.”</i></b></p> <p>“Conversely, social interaction in the context of participation in fall-prevention activities was not always welcomed because it placed the respondents in a context in which they did not like to see themselves.”</p> <p>“For others, <b><i>support from professionals was important in how they coped with falls</i></b> and their prevention. The GP was a good support when they needed knowledge about appropriate and applicable preventive activities.”</p>                                                                                                                          |
| <p>Xu, 2019[39]</p>   | <p>Thematic analysis<br/><br/>n=17</p>              | <p>Identified theme of restricted mobility and social participation.</p>                                                                                                                                                                                                                                                                                                                                                                                                                                                                                                                                                                                                                                                                                                                                                                                                                                                                                                                                                                                                                                                                                                                                                        |

1  
2  
3  
4  
5  
6  
7  
8  
9  
10  
11  
12  
13  
14  
15  
16  
17  
18  
19  
20  
21  
22  
23  
24  
25  
26  
27  
28  
29  
30  
31  
32  
33  
34  
35  
36  
37  
38  
39  
40  
41  
42  
43  
44  
45  
46  
47

|  |  |                                                                                                                                                                                                                                                                                                                                                                                                                                                                                                                                                                                                     |
|--|--|-----------------------------------------------------------------------------------------------------------------------------------------------------------------------------------------------------------------------------------------------------------------------------------------------------------------------------------------------------------------------------------------------------------------------------------------------------------------------------------------------------------------------------------------------------------------------------------------------------|
|  |  | <p><b><i>“Stroke participants felt that they were restricted after the fall, particularly around having reduced balance, and this affected their mobility functions and degree of social participation:</i></b></p> <p>I am getting worse, especially my balance. I used to walk for a short distance outside, but now I can’t. (S7)</p> <p>There was a big difference ... I used to walk with walking stick. But I have not been able to walk since that fall. (S8)</p> <p>Last time I could take public transport, go to [central area] and take a walk, now it’s too difficult for me. (S1)”</p> |
|--|--|-----------------------------------------------------------------------------------------------------------------------------------------------------------------------------------------------------------------------------------------------------------------------------------------------------------------------------------------------------------------------------------------------------------------------------------------------------------------------------------------------------------------------------------------------------------------------------------------------------|

For peer review only

## References

1. Murphy SL, Williams CS, Gill TM. Characteristics associated with fear of falling and activity restriction in community-living older persons. *J Am Geriatr Soc*. 2002 Mar;50(3):516-20.
2. Stel VS, Smit JH, Pluijm SM, Lips P. Consequences of falling in older men and women and risk factors for health service use and functional decline. *Age Ageing*. 2004 Jan;33(1):58-65.
3. Gagnon N, Flint AJ, Naglie G, Devins GM. Affective correlates of fear of falling in elderly persons. *Am J Geriatr Psychiatry*. 2005 Jan;13(1):7-14.
4. Curcio CL, Gomez F, Reyes-Ortiz CA. Activity restriction related to fear of falling among older people in the Colombian Andes mountains: are functional or psychosocial risk factors more important? *J Aging Health*. 2009 Jun;21(3):460-79.
5. Dias RC, Freire MT, Santos EG, Vieira RA, Dias JM, Perracini MR. Characteristics associated with activity restriction induced by fear of falling in community-dwelling elderly. *Rev Bras Fisioter*. 2011 Sep-Oct;15(5):406-13.
6. Nakaya N, Kogure M, Saito-Nakaya K, Tomata Y, Sone T, Kakizaki M, et al. The association between self-reported history of physical diseases and psychological distress in a community-dwelling Japanese population: the Ohsaki Cohort 2006 Study. *Eur J Public Health*. 2014 Feb;24(1):45-9.
7. Merchant RA, Chen MZ, Wong BLL, Ng SE, Shirooka H, Lim JY, et al. Relationship Between Fear of Falling, Fear-Related Activity Restriction, Frailty, and Sarcopenia. *J Am Geriatr Soc*. 2020 Nov;68(11):2602-8.
8. Vellas B, Cayla F, Bocquet H, de Pemille F, Albarede JL. Prospective study of restriction of activity in old people after falls. *Age Ageing*. 1987 May;16(3):189-93.
9. Tinetti ME, Williams CS. The effect of falls and fall injuries on functioning in community-dwelling older persons. *J Gerontol A Biol Sci Med Sci*. 1998 Mar;53(2):M112-9.
10. van der Meulen E, Zijlstra GA, Ambergen T, Kempen GI. Effect of fall-related concerns on physical, mental, and social function in community-dwelling older adults: a prospective cohort study. *J Am Geriatr Soc*. 2014 Dec;62(12):2333-8.
11. Pin S, Spini D. Impact of falling on social participation and social support trajectories in a middle-aged and elderly European sample. *SSM Popul Health*. 2016 Dec;2:382-9.
12. Yu K, Wu S, Jang Y, Chou CP, Wilber KH, Aranda MP, et al. Longitudinal Assessment of the Relationships Between Geriatric Conditions and Loneliness. *J Am Med Dir Assoc*. 2021 May;22(5):1107-13.e1.
13. Hajek A, König HH. What are the psychosocial consequences when fear of falling starts or ends? Evidence from an asymmetric fixed effects analysis based on longitudinal data from the general population. *Int J Geriatr Psychiatry*. 2020 Sep;35(9):1028-35.
14. Finn JM. The relationship between falls and fall-related efficacy, depression, and social resources: Adler School of Professional Psychology; 2001.
15. Nicholson Jr NR. The relationship between injurious falls, fear of falling, social isolation and depression. 2005.
16. Iliffe S, Kharicha K, Harari D, Swift C, Gillmann G, Stuck AE. Health risk appraisal in older people 2: the implications for clinicians and commissioners of social isolation risk in older people. *Br J Gen Pract*. 2007;57(537):277.

17. van Lankveld W, Fransen M, van den Hoogen F, den Broeder A. Age-related health hazards in old patients with first-time referral to a rheumatologist: a descriptive study. *Arthritis*. 2011;2011:823527.
18. Schnittger RI, Wherton J, Prendergast D, Lawlor BA. Risk factors and mediating pathways of loneliness and social support in community-dwelling older adults. *Aging Ment Health*. 2012;16(3):335-46.
19. Quach LT. Social Determinants of Falls: The Role of Social Support and Depression Among Community-Dwelling Older Adults. *Dissertation Abstracts International: Section B: The Sciences and Engineering 2018*; 78(8-B(E)):No Pagination Specified. 2016.
20. Hajek A, König HH. The association of falls with loneliness and social exclusion: evidence from the DEAS German Ageing Survey. *BMC Geriatr*. 2017 Sep 5;17(1):204.
21. Robins LM, Hill KD, Finch CF, Clemson L, Haines T. The association between physical activity and social isolation in community-dwelling older adults. *Aging Ment Health*. 2018 Feb;22(2):175-82.
22. Faria A, Martins M, Ribeiro O, Gomes BP, Fernandes C. Elderly residents in the community: gaining knowledge to support a rehabilitation nursing program. *Rev Bras Enferm*. 2020;73Suppl 3(Suppl 3):e20200194.
23. Vanden Wyngaert K, Van Craenenbroeck AH, Eloot S, Calders P, Celie B, Holvoet E, et al. Associations between the measures of physical function, risk of falls and the quality of life in haemodialysis patients: a cross-sectional study. *BMC Nephrol*. 2020 Jan 6;21(1):7.
24. Tinetti ME, Mendes de Leon CF, Doucette JT, Baker DI. Fear of falling and fall-related efficacy in relationship to functioning among community-living elders. *J Gerontol*. 1994 May;49(3):M140-7.
25. Howland J, Lachman ME, Peterson EW, Cote J, Kasten L, Jette A. Covariates of fear of falling and associated activity curtailment. *Gerontologist*. 1998 Oct;38(5):549-55.
26. Apikomkon H. Fear of falling and fall circumstances in Thailand: Curtin University; 2003.
27. Zijlstra GA, van Haastregt JC, van Eijk JT, van Rossum E, Stalenoef PA, Kempen GI. Prevalence and correlates of fear of falling, and associated avoidance of activity in the general population of community-living older people. *Age Ageing*. 2007 May;36(3):304-9.
28. Kara B, Yildirim Y, Genc A, Ekizler S. Assessment of home environment and life satisfaction in geriatrics and relation to fear of falling. *Turk J Physiother Rehabil*. 2009;20(3):190-200.
29. Mendes da Costa E, Pepersack T, Godin I, Bantuelle M, Petit B, Levêque A. Fear of falling and associated activity restriction in older people. results of a cross-sectional study conducted in a Belgian town. *Arch Public Health*. 2012 Jan 3;70(1):1.
30. Choi K, Ko Y. Characteristics Associated With Fear of Falling and Activity Restriction in South Korean Older Adults. *J Aging Health*. 2015 Sep;27(6):1066-83.
31. Ferreira FR, César CC, Andrade FB, Souza Junior PRB, Lima-Costa MF, Proietti FA. Aspects of social participation and neighborhood perception: ELSI-Brazil. *Rev Saude Publica*. 2018 Oct 25;52Suppl 2(Suppl 2):18s.
32. Petrinc AB, Crowe ML, Flanagan SK, Baker J. Health-related Quality of Life of Older Women Religious: Negative Influence of Frailty. *West J Nurs Res*. 2020 Dec;42(12):1088-96.
33. Ward-Griffin C, Hobson S, Melles P, Kloseck M, Vandervoort A, Crilly R. Falls and Fear of Falling among Community-Dwelling Seniors: The Dynamic Tension between Exercising Precaution and Striving for Independence. *Canadian Journal on Aging / La Revue canadienne du vieillissement*. 2004;23(4):307-18.

- 1  
2  
3 34. Meric MO, Fahriye. A qualitative study on perception of elderly about fear of falling and it's impact on daily life. Turkish Journal of  
4 Geriatrics. 2007;10(1):19-23.  
5 35. Schmid AA, Rittman M. Consequences of poststroke falls: activity limitation, increased dependence, and the development of fear of  
6 falling. Am J Occup Ther. 2009 May-Jun;63(3):310-6.  
7 36. Faes MC, Reelick MF, Joosten-Weyn Banningh LW, Gier M, Esselink RA, Olde Rikkert MG. Qualitative study on the impact of falling in frail  
8 older persons and family caregivers: foundations for an intervention to prevent falls. Aging Ment Health. 2010 Sep;14(7):834-42.  
9 37. Chiu MW-Y. Psychosocial responses to falling in older Chinese immigrants living in the community 2010.  
10 38. Høst D, Hendriksen C, Borup I. Older people's perception of and coping with falling, and their motivation for fall-prevention  
11 programmes. Scand J Public Health. 2011 Nov;39(7):742-8.  
12 39. Xu T, O'Loughlin K, Clemson L, Lannin NA, Dean C, Koh G. Developing a falls prevention program for community-dwelling stroke survivors  
13 in Singapore: client and caregiver perspectives. Disabil Rehabil. 2019 May;41(9):1044-54.  
14  
15  
16  
17  
18  
19  
20  
21  
22  
23  
24  
25  
26  
27  
28  
29  
30  
31  
32  
33  
34  
35  
36  
37  
38  
39  
40  
41  
42  
43  
44  
45  
46  
47

## Preferred Reporting Items for Systematic reviews and Meta-Analyses extension for Scoping Reviews (PRISMA-ScR) Checklist

| SECTION                                               | ITEM | PRISMA-ScR CHECKLIST ITEM                                                                                                                                                                                                                                                                                  | REPORTED ON PAGE # |
|-------------------------------------------------------|------|------------------------------------------------------------------------------------------------------------------------------------------------------------------------------------------------------------------------------------------------------------------------------------------------------------|--------------------|
| <b>TITLE</b>                                          |      |                                                                                                                                                                                                                                                                                                            |                    |
| Title                                                 | 1    | Identify the report as a scoping review.                                                                                                                                                                                                                                                                   | 1                  |
| <b>ABSTRACT</b>                                       |      |                                                                                                                                                                                                                                                                                                            |                    |
| Structured summary                                    | 2    | Provide a structured summary that includes (as applicable): background, objectives, eligibility criteria, sources of evidence, charting methods, results, and conclusions that relate to the review questions and objectives.                                                                              | 3                  |
| <b>INTRODUCTION</b>                                   |      |                                                                                                                                                                                                                                                                                                            |                    |
| Rationale                                             | 3    | Describe the rationale for the review in the context of what is already known. Explain why the review questions/objectives lend themselves to a scoping review approach.                                                                                                                                   | 5                  |
| Objectives                                            | 4    | Provide an explicit statement of the questions and objectives being addressed with reference to their key elements (e.g., population or participants, concepts, and context) or other relevant key elements used to conceptualize the review questions and/or objectives.                                  | 5                  |
| <b>METHODS</b>                                        |      |                                                                                                                                                                                                                                                                                                            |                    |
| Protocol and registration                             | 5    | Indicate whether a review protocol exists; state if and where it can be accessed (e.g., a Web address); and if available, provide registration information, including the registration number.                                                                                                             | 5-6                |
| Eligibility criteria                                  | 6    | Specify characteristics of the sources of evidence used as eligibility criteria (e.g., years considered, language, and publication status), and provide a rationale.                                                                                                                                       | 6-7                |
| Information sources*                                  | 7    | Describe all information sources in the search (e.g., databases with dates of coverage and contact with authors to identify additional sources), as well as the date the most recent search was executed.                                                                                                  | 6                  |
| Search                                                | 8    | Present the full electronic search strategy for at least 1 database, including any limits used, such that it could be repeated.                                                                                                                                                                            | Appendix 1         |
| Selection of sources of evidence†                     | 9    | State the process for selecting sources of evidence (i.e., screening and eligibility) included in the scoping review.                                                                                                                                                                                      | 6                  |
| Data charting process‡                                | 10   | Describe the methods of charting data from the included sources of evidence (e.g., calibrated forms or forms that have been tested by the team before their use, and whether data charting was done independently or in duplicate) and any processes for obtaining and confirming data from investigators. | 8                  |
| Data items                                            | 11   | List and define all variables for which data were sought and any assumptions and simplifications made.                                                                                                                                                                                                     | 7-8                |
| Critical appraisal of individual sources of evidence§ | 12   | If done, provide a rationale for conducting a critical appraisal of included sources of evidence; describe the methods used and how this information was used in any data synthesis (if appropriate).                                                                                                      | N/A                |
| Synthesis of results                                  | 13   | Describe the methods of handling and summarizing the data that were charted.                                                                                                                                                                                                                               | Appendix 4-6       |





| SECTION                                       | ITEM | PRISMA-ScR CHECKLIST ITEM                                                                                                                                                                       | REPORTED ON PAGE #        |
|-----------------------------------------------|------|-------------------------------------------------------------------------------------------------------------------------------------------------------------------------------------------------|---------------------------|
| <b>RESULTS</b>                                |      |                                                                                                                                                                                                 |                           |
| Selection of sources of evidence              | 14   | Give numbers of sources of evidence screened, assessed for eligibility, and included in the review, with reasons for exclusions at each stage, ideally using a flow diagram.                    | 8; Figure 1               |
| Characteristics of sources of evidence        | 15   | For each source of evidence, present characteristics for which data were charted and provide the citations.                                                                                     | 8-11; Table 1; Appendix 7 |
| Critical appraisal within sources of evidence | 16   | If done, present data on critical appraisal of included sources of evidence (see item 12).                                                                                                      | N/A                       |
| Results of individual sources of evidence     | 17   | For each included source of evidence, present the relevant data that were charted that relate to the review questions and objectives.                                                           | 11-15                     |
| Synthesis of results                          | 18   | Summarize and/or present the charting results as they relate to the review questions and objectives.                                                                                            | Table 2                   |
| <b>DISCUSSION</b>                             |      |                                                                                                                                                                                                 |                           |
| Summary of evidence                           | 19   | Summarize the main results (including an overview of concepts, themes, and types of evidence available), link to the review questions and objectives, and consider the relevance to key groups. | 15-16                     |
| Limitations                                   | 20   | Discuss the limitations of the scoping review process.                                                                                                                                          | 17                        |
| Conclusions                                   | 21   | Provide a general interpretation of the results with respect to the review questions and objectives, as well as potential implications and/or next steps.                                       | 17                        |
| <b>FUNDING</b>                                |      |                                                                                                                                                                                                 |                           |
| Funding                                       | 22   | Describe sources of funding for the included sources of evidence, as well as sources of funding for the scoping review. Describe the role of the funders of the scoping review.                 | 18                        |

JBI = Joanna Briggs Institute; PRISMA-ScR = Preferred Reporting Items for Systematic reviews and Meta-Analyses extension for Scoping Reviews.

\* Where *sources of evidence* (see second footnote) are compiled from, such as bibliographic databases, social media platforms, and Web sites.

† A more inclusive/heterogeneous term used to account for the different types of evidence or data sources (e.g., quantitative and/or qualitative research, expert opinion, and policy documents) that may be eligible in a scoping review as opposed to only studies. This is not to be confused with *information sources* (see first footnote).

‡ The frameworks by Arksey and O'Malley (6) and Levac and colleagues (7) and the JBI guidance (4, 5) refer to the process of data extraction in a scoping review as data charting.

§ The process of systematically examining research evidence to assess its validity, results, and relevance before using it to inform a decision. This term is used for items 12 and 19 instead of "risk of bias" (which is more applicable to systematic reviews of interventions) to include and acknowledge the various sources of evidence that may be used in a scoping review (e.g., quantitative and/or qualitative research, expert opinion, and policy document).

From: Tricco AC, Lillie E, Zarin W, O'Brien KK, Colquhoun H, Levac D, et al. PRISMA Extension for Scoping Reviews (PRISMA-ScR): Checklist and Explanation. *Ann Intern Med.* 2018;169:467–473. doi: 10.7326/M18-0850.



St. Michael's

Inspired Care.  
Inspiring Science.

For peer review only - <http://bmjopen.bmj.com/site/about/guidelines.xhtml>
